# Supplementary material for: Molecular Signatures in Arabidopsis thaliana in Response to Insect Attack and Bacterial Infection
Source: PLoS One. 2013 Mar 25;8(3):e58987. doi: 10.1371/journal.pone.0058987 (PMC3607608; doi:10.1371/journal.pone.0058987)
Supplement: File S4 — MapMan input file for all aphid-responsive genes and corresponding log2-transformed expression values. (XLS) [file pone.0058987.s004.xls]

## Sheet: Sheet1
MapMan input file for all B. brassicae -responsive genes and corresponding log2-transformed expression values.
Gene locus ID	LoG2 raTio
AT3G17820	-0.052
AT2G43430	-0.06
AT5G09900	-0.22
AT1G63420	-0.237
AT3G61580	-0.242
AT5G42190	-0.25
AT4G28360	-0.254
AT3G43810	-0.254
AT1G68870	-0.259
AT2G21640	-0.27
AT3G07410	-0.291
AT3G61780	-0.298
AT2G18290	-0.299
AT3G26810	-0.3
AT3G55250	-0.303
AT5G10240	-0.31
AT3G47650	-0.311
AT1G30580	-0.313
AT4G15110	-0.314
AT2G47590	-0.317
AT4G16800	-0.319
AT4G08876	-0.319
AT1G01320	-0.32
AT1G35160	-0.32
AT1G69330	-0.32
AT1G07720	-0.321
AT3G57800	-0.325
AT4G18130	-0.325
AT4G17090	-0.326
AT2G36930	-0.327
AT1G28100	-0.33
AT3G11500	-0.33
AT4G37590	-0.33
AT1G76080	-0.331
AT2G26770	-0.333
AT5G51180	-0.333
AT3G01280	-0.334
AT3G13700	-0.335
AT3G59600	-0.336
AT5G59440	-0.338
AT4G00630	-0.339
AT5G18520	-0.34
AT1G59840	-0.34
AT2G30500	-0.34
AT2G25970	-0.342
AT3G09800	-0.342
AT5G65120	-0.342
AT1G32410	-0.343
AT1G35420	-0.344
AT2G38550	-0.345
AT5G14320	-0.345
AT4G25910	-0.346
AT5G19820	-0.346
AT1G10060	-0.347
AT5G50335	-0.348
AT5G05470	-0.348
AT1G34390	-0.35
AT1G06190	-0.351
AT2G19385	-0.352
AT2G13070	-0.352
AT4G20940	-0.352
AT5G46530	-0.352
AT1G32470	-0.353
AT3G16290	-0.353
AT3G32930	-0.354
AT1G55370	-0.355
AT1G65320	-0.355
AT4G01800	-0.356
AT2G20450	-0.357
AT2G41040	-0.357
AT1G20340	-0.357
AT3G03010	-0.357
AT4G03205	-0.357
AT1G43710	-0.358
AT3G25470	-0.358
AT3G10230	-0.358
AT1G70490	-0.358
AT5G17000	-0.358
AT4G30993	-0.359
AT2G15690	-0.359
AT3G13226	-0.359
AT4G33750	-0.36
AT4G38570	-0.361
AT5G38520	-0.361
AT4G33180	-0.361
AT1G10380	-0.362
AT4G36810	-0.363
AT5G21920	-0.364
AT2G44120	-0.364
AT3G28070	-0.365
AT5G13300	-0.365
AT1G45474	-0.365
AT2G27040	-0.365
AT4G04880	-0.365
AT1G68490	-0.366
AT5G16590	-0.367
AT1G78995	-0.368
AT1G43860	-0.368
AT2G13440	-0.369
AT3G06700	-0.37
AT5G17010	-0.37
AT2G41370	-0.371
AT1G74880	-0.371
AT5G02540	-0.372
AT4G03415	-0.372
AT4G17120	-0.372
AT3G58610	-0.372
AT2G20840	-0.372
AT5G46580	-0.373
AT3G59650	-0.373
AT4G09150	-0.373
AT3G60210	-0.373
AT5G08080	-0.374
AT2G01420	-0.374
AT1G07650	-0.375
AT3G56680	-0.375
AT1G10430	-0.375
AT3G05490	-0.375
AT1G70310	-0.375
AT4G25500	-0.375
AT3G16570	-0.375
AT3G02780	-0.376
AT4G13195	-0.376
AT1G47813	-0.376
AT2G43360	-0.376
AT4G10080	-0.376
AT1G01500	-0.376
AT4G37550	-0.376
AT2G40460	-0.377
AT5G19220	-0.377
AT1G27450	-0.378
AT5G48590	-0.378
AT2G16370	-0.379
AT3G27060	-0.379
AT2G28105	-0.379
AT4G02990	-0.379
AT3G15030	-0.38
AT5G12860	-0.38
AT2G32440	-0.381
AT3G63460	-0.381
AT3G48110	-0.381
AT3G49240	-0.381
AT2G28605	-0.382
AT4G07524	-0.382
AT5G59180	-0.382
AT3G18530	-0.382
AT3G60810	-0.382
AT1G58350	-0.383
AT3G51140	-0.384
AT4G34555	-0.384
AT1G50140	-0.385
AT4G19006	-0.385
AT3G03830	-0.385
AT5G64670	-0.385
AT3G18870	-0.386
AT1G80690	-0.386
AT1G16920	-0.386
AT4G30220	-0.386
AT3G06640	-0.386
AT4G35905	-0.388
AT2G46735	-0.388
AT1G15660	-0.388
AT1G75590	-0.388
AT1G80380	-0.388
AT5G10390	-0.388
AT2G45820	-0.388
AT5G64820	-0.389
AT2G40070	-0.389
AT3G12860	-0.389
AT3G09500	-0.39
AT1G75600	-0.39
AT3G17360	-0.39
AT5G56600	-0.39
AT1G50450	-0.39
AT3G14930	-0.39
AT1G44575	-0.391
AT5G63060	-0.391
AT3G46060	-0.391
AT2G05210	-0.391
AT1G49760	-0.391
AT1G07770	-0.391
AT5G55580	-0.391
AT4G34350	-0.392
AT4G30660	-0.392
AT3G61260	-0.392
AT1G11090	-0.392
AT5G37020	-0.393
AT5G23040	-0.393
AT2G24090	-0.393
AT2G37180	-0.394
AT3G30180	-0.394
AT1G74470	-0.394
AT2G33810	-0.395
AT4G01590	-0.395
AT5G44530	-0.395
AT1G34340	-0.395
AT2G14890	-0.396
AT1G07820	-0.396
AT4G09020	-0.396
AT4G19100	-0.396
AT4G02510	-0.396
AT3G11700	-0.396
AT3G25040	-0.396
AT1G76990	-0.397
AT1G56500	-0.397
AT4G37300	-0.397
AT5G23420	-0.397
AT3G28900	-0.398
AT5G35160	-0.398
AT1G44920	-0.398
AT1G03930	-0.398
AT5G67560	-0.398
AT3G62820	-0.398
AT1G30360	-0.399
AT4G14510	-0.399
AT1G19740	-0.4
AT4G33250	-0.4
AT2G31360	-0.4
AT5G13630	-0.4
AT2G39920	-0.4
AT3G24770	-0.401
AT1G62430	-0.401
AT4G39960	-0.401
AT2G27190	-0.401
AT4G24090	-0.401
AT3G15110	-0.401
AT3G01810	-0.401
AT4G17520	-0.401
AT4G19830	-0.402
AT1G32440	-0.402
AT5G53580	-0.402
AT4G09800	-0.402
AT1G12120	-0.403
AT2G47160	-0.403
AT3G02720	-0.403
AT5G35840	-0.404
AT4G25370	-0.404
AT5G66520	-0.404
AT1G54040	-0.405
AT2G27960	-0.405
AT3G61970	-0.405
AT3G04730	-0.406
AT2G39800	-0.406
AT5G62980	-0.406
AT2G22190	-0.406
AT1G05360	-0.407
AT2G36880	-0.407
AT5G59910	-0.407
AT5G25130	-0.407
AT3G44140	-0.407
AT3G50685	-0.407
AT1G75990	-0.408
AT4G09010	-0.408
AT1G17730	-0.408
AT5G22620	-0.409
AT2G37050	-0.409
AT5G65610	-0.409
AT1G32860	-0.409
AT3G21580	-0.409
AT2G40760	-0.409
AT1G23360	-0.409
AT3G10060	-0.409
AT2G21195	-0.41
AT1G26880	-0.41
AT5G43700	-0.411
AT2G18940	-0.411
AT1G70760	-0.411
AT1G60780	-0.411
AT3G02480	-0.411
AT5G27290	-0.411
AT3G63490	-0.412
AT2G30410	-0.412
AT4G21860	-0.412
AT2G45860	-0.412
AT4G04955	-0.413
AT3G56590	-0.413
AT2G40475	-0.413
AT2G41720	-0.413
AT5G62350	-0.413
AT4G39150	-0.414
AT5G48910	-0.414
AT2G23760	-0.414
AT3G62750	-0.414
AT1G59930	-0.414
AT1G13820	-0.414
AT2G31140	-0.414
AT4G34480	-0.414
AT1G37150	-0.415
AT4G13770	-0.415
AT2G22120	-0.416
AT3G15820	-0.416
AT5G62440	-0.416
AT2G33855	-0.416
AT3G14420	-0.416
AT1G20330	-0.416
AT5G65410	-0.416
AT5G17870	-0.416
AT3G16800	-0.417
AT5G43270	-0.418
AT4G18740	-0.418
AT5G12130	-0.418
AT4G33500	-0.418
AT3G14600	-0.418
AT1G08030	-0.418
AT3G04830	-0.418
AT5G49170	-0.419
AT3G53750	-0.419
AT2G45970	-0.419
AT1G30910	-0.419
AT5G59480	-0.42
AT3G62530	-0.42
AT1G50320	-0.42
AT5G03520	-0.421
AT5G12950	-0.421
AT5G65220	-0.421
AT1G63780	-0.421
AT3G17611	-0.422
AT1G48450	-0.422
AT5G15520	-0.422
AT5G37475	-0.422
AT1G49510	-0.422
AT4G21770	-0.423
AT5G43430	-0.423
AT2G29730	-0.423
AT4G37330	-0.423
AT1G75180	-0.424
AT1G66050	-0.424
AT4G36360	-0.424
AT5G13650	-0.425
AT5G66060	-0.425
AT1G44960	-0.426
AT2G40840	-0.426
AT1G18800	-0.426
AT1G47820	-0.426
AT1G64780	-0.426
AT1G07320	-0.426
AT3G09890	-0.427
AT5G09240	-0.427
AT1G77122	-0.427
AT1G18810	-0.427
AT2G03420	-0.427
AT4G38510	-0.427
AT2G04790	-0.428
AT2G44820	-0.428
AT5G18570	-0.428
AT3G47910	-0.428
AT4G38920	-0.429
AT1G04680	-0.429
AT1G20030	-0.429
AT5G39800	-0.429
AT2G46640	-0.429
AT1G06960	-0.429
AT4G34950	-0.429
AT4G11820	-0.43
AT4G01060	-0.431
AT2G04395	-0.431
AT5G59300	-0.431
AT4G00950	-0.431
AT5G02180	-0.432
AT2G18900	-0.433
AT4G29490	-0.433
AT2G38760	-0.433
AT4G20760	-0.433
AT3G46940	-0.433
AT4G29870	-0.433
AT1G26150	-0.434
AT3G33064	-0.435
AT1G01630	-0.435
AT2G21200	-0.435
AT1G08580	-0.435
AT1G18490	-0.435
AT5G04160	-0.435
AT5G09860	-0.436
AT5G40080	-0.436
AT2G30100	-0.436
AT4G33350	-0.436
AT2G05920	-0.437
AT3G27850	-0.437
AT3G04340	-0.437
AT5G56890	-0.437
AT5G64040	-0.437
AT5G59150	-0.437
AT1G47550	-0.437
AT1G19720	-0.437
AT4G39620	-0.438
AT4G14890	-0.438
AT3G09162	-0.439
AT5G65860	-0.439
AT3G46030	-0.439
AT2G14750	-0.44
AT1G34060	-0.44
AT5G61290	-0.44
AT5G17620	-0.44
AT5G47435	-0.44
AT1G19570	-0.441
AT1G99999	-0.441
AT5G52060	-0.442
AT4G33530	-0.442
AT1G03310	-0.442
AT3G03950	-0.442
AT5G64030	-0.442
AT4G13720	-0.442
AT1G65190	-0.442
AT2G47890	-0.443
AT1G78610	-0.443
AT5G58490	-0.444
AT1G26820	-0.444
AT3G19720	-0.444
AT3G12750	-0.444
AT4G39880	-0.444
AT3G47380	-0.444
AT3G27160	-0.444
AT4G15790	-0.444
AT2G27770	-0.445
AT2G04570	-0.445
AT5G04710	-0.445
AT1G33600	-0.445
AT1G31860	-0.446
AT1G11820	-0.446
AT5G44660	-0.446
AT2G44860	-0.446
AT2G32090	-0.446
AT2G16740	-0.446
AT1G73090	-0.447
AT5G20190	-0.447
AT1G06690	-0.447
AT3G23080	-0.447
AT3G22420	-0.448
AT1G63810	-0.448
AT5G48220	-0.449
AT4G20890	-0.449
AT2G46530	-0.449
AT3G46180	-0.449
AT1G35080	-0.45
AT3G54050	-0.45
AT4G18670	-0.45
AT5G54145	-0.45
AT4G26500	-0.45
AT5G66720	-0.451
AT3G52380	-0.451
AT5G57345	-0.451
AT4G37200	-0.452
AT1G60000	-0.452
AT1G14620	-0.452
AT2G27340	-0.452
AT2G33860	-0.452
AT1G15825	-0.452
AT3G05350	-0.453
AT3G52155	-0.453
AT3G53580	-0.453
AT2G25430	-0.454
AT4G34560	-0.454
AT1G25290	-0.454
AT3G45600	-0.455
AT5G66900	-0.455
AT1G54500	-0.455
AT1G53000	-0.455
AT2G43770	-0.455
AT3G53110	-0.455
AT3G49910	-0.455
AT2G36620	-0.455
AT1G68725	-0.456
AT3G02220	-0.456
AT3G62630	-0.456
AT4G28660	-0.456
AT4G10430	-0.457
AT5G24840	-0.457
AT3G21390	-0.457
AT1G34245	-0.457
AT1G52150	-0.457
AT5G18800	-0.458
AT1G60990	-0.458
AT3G25480	-0.458
AT2G31725	-0.458
AT5G49910	-0.458
AT4G13170	-0.459
AT5G09760	-0.459
AT2G05070	-0.459
AT2G19860	-0.459
AT2G47940	-0.459
AT3G12260	-0.459
AT1G57660	-0.459
AT1G33040	-0.459
AT1G52510	-0.46
AT3G49220	-0.46
AT3G09150	-0.461
AT2G40490	-0.461
AT3G13180	-0.461
AT1G49380	-0.461
AT5G16710	-0.462
AT1G43670	-0.462
AT1G07940	-0.462
AT3G56910	-0.462
AT3G49430	-0.462
AT3G04920	-0.462
AT5G10690	-0.463
AT4G25320	-0.463
AT4G27080	-0.463
AT1G49560	-0.463
AT1G05385	-0.463
AT1G75780	-0.464
AT3G62690	-0.464
AT3G56330	-0.464
AT4G17030	-0.464
AT5G17400	-0.464
AT1G07310	-0.464
AT3G09035	-0.465
AT1G61010	-0.465
AT1G60950	-0.465
AT4G25130	-0.465
AT1G78790	-0.465
AT5G08415	-0.465
AT1G22780	-0.465
AT5G06480	-0.465
AT2G15090	-0.466
AT1G07780	-0.466
AT1G41880	-0.466
AT4G33110	-0.466
AT2G27470	-0.466
AT3G50560	-0.466
AT2G07739	-0.467
AT4G32980	-0.467
AT3G15900	-0.467
AT3G03270	-0.467
AT5G14460	-0.468
AT5G64740	-0.468
AT5G36290	-0.468
AT5G64480	-0.468
AT4G18730	-0.468
AT5G57180	-0.468
AT4G13930	-0.469
AT3G18050	-0.469
AT5G43050	-0.469
AT5G30495	-0.469
AT3G60770	-0.469
AT3G27030	-0.469
AT5G11580	-0.469
AT1G26770	-0.47
AT1G45230	-0.47
AT3G47450	-0.47
AT4G04640	-0.47
AT2G28660	-0.47
AT3G14210	-0.47
AT1G52140	-0.47
AT3G04630	-0.471
AT5G55710	-0.471
AT1G74070	-0.471
AT1G66820	-0.471
AT5G63420	-0.471
AT4G25050	-0.472
AT5G18960	-0.472
AT3G03710	-0.472
AT4G11120	-0.473
AT1G26180	-0.473
AT4G33380	-0.473
AT1G76710	-0.473
AT2G16780	-0.473
AT1G34640	-0.473
AT5G53880	-0.473
AT1G48480	-0.473
AT4G13500	-0.474
AT1G15290	-0.474
AT5G17790	-0.474
AT5G12150	-0.474
AT3G25140	-0.474
AT1G54630	-0.474
AT1G63610	-0.474
AT5G66190	-0.474
AT2G30170	-0.474
AT5G45650	-0.475
AT4G34020	-0.475
AT3G28300	-0.475
AT3G27080	-0.475
AT4G19530	-0.476
AT5G02530	-0.476
AT4G01390	-0.476
AT3G20300	-0.476
AT5G45930	-0.476
AT1G03250	-0.476
AT3G46630	-0.476
AT3G58700	-0.477
AT5G23430	-0.477
AT3G44890	-0.477
AT5G37890	-0.478
AT1G72630	-0.478
AT5G44410	-0.478
AT3G26060	-0.478
AT4G22200	-0.478
AT2G30160	-0.478
AT1G55160	-0.478
AT5G13930	-0.478
AT3G03210	-0.478
AT5G28060	-0.478
AT2G20270	-0.479
AT2G31380	-0.479
AT5G58070	-0.479
AT1G74800	-0.479
AT3G26710	-0.479
AT5G65990	-0.479
AT1G32290	-0.479
AT2G41350	-0.48
AT4G34240	-0.48
AT2G34430	-0.48
AT4G11630	-0.48
AT5G52970	-0.481
AT1G05850	-0.481
AT5G55630	-0.481
AT5G45620	-0.481
AT1G20450	-0.481
AT2G41950	-0.482
AT1G79850	-0.482
AT5G40950	-0.482
AT5G45760	-0.482
AT2G42870	-0.482
AT2G20990	-0.482
AT3G51895	-0.482
AT1G75300	-0.482
AT2G31600	-0.482
AT4G19985	-0.483
AT5G60860	-0.483
AT1G24120	-0.483
AT5G06970	-0.483
AT4G38430	-0.483
AT5G57320	-0.484
AT3G53100	-0.484
AT2G06925	-0.484
AT5G57800	-0.484
AT5G02120	-0.484
AT4G15000	-0.485
AT4G16770	-0.485
AT2G29180	-0.485
AT5G20000	-0.485
AT3G23390	-0.485
AT5G67260	-0.485
AT5G27300	-0.485
AT1G42430	-0.486
AT1G18540	-0.486
AT3G25717	-0.486
AT5G15230	-0.486
AT3G44620	-0.486
AT3G29160	-0.487
AT1G72500	-0.487
AT3G20570	-0.487
AT1G68560	-0.487
AT1G68050	-0.488
AT4G26965	-0.488
AT5G10020	-0.488
AT5G62840	-0.488
AT5G15160	-0.488
AT1G62180	-0.489
AT5G48170	-0.489
AT4G32270	-0.489
AT2G17360	-0.489
AT3G11520	-0.489
AT5G35630	-0.489
AT2G46170	-0.489
AT1G06550	-0.49
AT4G32915	-0.49
AT1G43560	-0.49
AT4G00810	-0.49
AT1G08110	-0.49
AT2G27710	-0.49
AT4G28180	-0.491
AT4G08170	-0.491
AT1G76460	-0.491
AT4G13220	-0.491
AT5G36120	-0.491
AT3G23710	-0.493
AT5G47900	-0.493
AT2G35620	-0.493
AT5G49740	-0.493
AT5G47210	-0.494
AT4G20870	-0.494
AT5G58970	-0.494
AT3G43670	-0.494
AT4G17390	-0.494
AT5G63780	-0.494
AT1G71990	-0.494
AT1G53670	-0.494
AT2G35660	-0.494
AT4G31820	-0.495
AT5G60850	-0.495
AT4G27690	-0.495
AT2G05990	-0.496
AT2G22470	-0.496
AT2G01250	-0.497
AT5G47780	-0.497
AT1G23460	-0.497
AT2G24020	-0.497
AT5G21430	-0.498
AT5G63220	-0.498
AT1G50730	-0.498
AT2G31150	-0.498
AT5G40160	-0.498
AT1G12020	-0.499
AT5G12900	-0.499
AT1G44835	-0.5
AT5G32450	-0.5
AT2G46340	-0.5
AT5G42130	-0.5
AT3G44380	-0.5
AT2G42770	-0.5
AT2G31170	-0.5
AT3G15270	-0.5
AT1G33470	-0.501
AT4G17770	-0.501
AT4G38370	-0.501
AT3G04260	-0.501
AT4G34820	-0.501
AT2G48120	-0.501
AT5G60920	-0.502
AT2G27530	-0.502
AT4G36910	-0.502
AT1G32080	-0.502
AT1G70090	-0.503
AT5G05860	-0.503
AT5G23740	-0.503
AT3G11750	-0.503
AT5G67530	-0.503
AT1G17850	-0.503
AT3G26290	-0.503
AT2G01630	-0.504
AT3G19680	-0.504
AT5G59770	-0.504
AT1G23280	-0.504
AT3G44310	-0.505
AT4G31360	-0.505
AT4G15450	-0.505
AT5G15760	-0.505
AT5G04430	-0.505
AT1G27210	-0.505
AT2G34680	-0.505
AT3G09900	-0.505
AT5G51110	-0.506
AT2G19730	-0.506
AT5G40820	-0.506
AT1G12080	-0.506
AT1G27050	-0.506
AT4G02130	-0.506
AT2G19760	-0.506
AT3G62110	-0.507
AT5G20630	-0.507
AT4G33660	-0.507
AT5G16930	-0.507
AT5G16140	-0.508
AT2G39450	-0.508
AT5G50280	-0.509
AT5G16715	-0.509
AT1G67050	-0.509
AT4G00180	-0.509
AT4G25100	-0.509
AT1G77490	-0.509
AT1G01910	-0.509
AT4G20440	-0.509
AT4G31590	-0.509
AT5G17510	-0.51
AT4G32260	-0.51
AT2G20830	-0.51
AT1G72030	-0.51
AT1G12900	-0.51
AT2G03480	-0.511
AT3G09580	-0.511
AT4G09580	-0.511
AT2G35490	-0.511
AT4G28210	-0.511
AT5G13120	-0.511
AT4G26780	-0.511
AT1G80050	-0.512
AT4G37870	-0.512
AT5G14500	-0.512
AT4G00755	-0.512
AT2G20120	-0.513
AT2G43710	-0.513
AT3G62390	-0.514
AT2G32720	-0.514
AT1G14720	-0.514
AT1G10360	-0.514
AT2G39850	-0.514
AT5G16550	-0.515
AT3G07430	-0.515
AT3G62910	-0.515
AT1G18360	-0.516
AT3G09820	-0.516
AT1G71260	-0.516
AT2G39390	-0.516
AT3G21870	-0.516
AT5G67280	-0.516
AT1G03160	-0.517
AT1G21350	-0.517
AT4G24670	-0.517
AT5G64580	-0.517
AT5G26360	-0.518
AT4G29750	-0.518
AT4G10450	-0.518
AT3G14890	-0.518
AT5G38140	-0.518
AT2G40610	-0.518
AT5G22710	-0.518
AT1G74050	-0.519
AT3G17950	-0.519
AT1G70890	-0.519
AT3G57890	-0.519
AT3G10620	-0.519
AT3G59970	-0.519
AT5G26000	-0.519
AT1G10510	-0.52
AT4G32570	-0.52
AT5G54070	-0.52
AT1G09900	-0.52
AT2G48070	-0.52
AT1G04520	-0.521
AT1G26650	-0.521
AT1G54310	-0.521
AT1G17090	-0.522
AT4G34220	-0.522
AT4G29120	-0.522
AT5G47110	-0.523
AT1G16350	-0.523
AT3G19180	-0.523
AT5G50375	-0.524
AT3G27180	-0.524
AT4G30410	-0.524
AT3G13710	-0.524
AT4G38680	-0.524
AT2G25080	-0.525
AT3G27906	-0.525
AT4G21750	-0.525
AT1G34030	-0.525
AT2G13360	-0.525
AT4G31700	-0.525
AT3G17210	-0.525
AT4G29060	-0.525
AT3G14110	-0.525
AT4G18390	-0.526
AT1G63240	-0.526
AT2G18110	-0.526
AT2G28720	-0.526
AT2G40300	-0.526
AT1G54690	-0.526
AT5G51750	-0.526
AT2G36830	-0.527
AT1G62750	-0.527
AT1G10840	-0.527
AT4G17460	-0.527
AT4G16845	-0.527
AT1G75280	-0.527
AT3G07950	-0.527
AT1G29440	-0.527
AT3G05880	-0.527
AT5G50110	-0.528
AT2G40670	-0.528
AT2G27810	-0.528
AT1G51560	-0.528
AT2G03330	-0.528
AT5G48240	-0.529
AT1G77590	-0.529
AT1G44170	-0.529
AT2G34510	-0.529
AT3G13580	-0.529
AT4G13050	-0.529
AT4G04840	-0.529
AT2G32230	-0.529
AT2G17972	-0.53
AT2G25610	-0.53
AT4G24930	-0.53
AT5G18020	-0.53
AT1G58440	-0.531
AT1G48240	-0.531
AT1G29965	-0.531
AT1G10522	-0.532
AT5G45420	-0.533
AT3G12110	-0.533
AT1G74780	-0.533
AT5G43960	-0.533
AT1G63000	-0.533
AT5G11690	-0.533
AT4G38710	-0.534
AT1G66330	-0.534
AT5G63310	-0.534
AT2G24250	-0.534
AT1G63120	-0.534
AT5G44650	-0.535
AT4G36250	-0.536
AT2G42220	-0.536
AT1G15180	-0.537
AT5G26960	-0.537
AT3G48800	-0.537
AT3G02560	-0.537
AT1G29510	-0.537
AT4G23920	-0.537
AT1G74520	-0.538
AT3G02020	-0.538
AT3G23700	-0.538
AT5G15770	-0.538
AT5G59870	-0.538
AT3G21300	-0.538
AT1G10020	-0.539
AT1G06240	-0.539
AT4G14440	-0.539
AT4G00050	-0.539
AT1G68400	-0.539
AT5G08740	-0.54
AT3G47430	-0.54
AT3G57000	-0.54
AT2G41310	-0.54
AT5G18080	-0.54
AT1G10030	-0.54
AT1G14580	-0.54
AT4G25890	-0.54
AT2G07690	-0.54
AT5G38360	-0.541
AT1G12330	-0.541
AT3G26570	-0.541
AT5G55620	-0.541
AT3G54920	-0.541
AT5G64940	-0.542
AT4G37800	-0.542
AT5G06770	-0.542
AT4G31850	-0.542
AT4G31350	-0.542
AT1G06950	-0.542
AT3G61870	-0.542
AT2G47510	-0.542
AT1G05190	-0.543
AT3G56130	-0.543
AT3G44430	-0.543
AT3G01060	-0.543
AT5G48760	-0.543
AT1G26810	-0.543
AT4G09730	-0.543
AT2G33310	-0.543
AT3G57030	-0.543
AT3G08940	-0.544
AT4G00165	-0.545
AT4G24830	-0.545
AT3G19590	-0.545
AT1G70830	-0.545
AT4G30825	-0.546
AT1G16080	-0.546
AT4G32930	-0.546
AT5G59010	-0.547
AT1G44750	-0.547
AT3G03860	-0.548
AT3G10720	-0.548
AT1G17220	-0.549
AT5G65780	-0.549
AT1G52830	-0.55
AT2G01830	-0.55
AT1G26850	-0.55
AT1G08550	-0.551
AT3G23830	-0.551
AT2G37270	-0.551
AT2G23610	-0.551
AT4G30690	-0.551
AT5G25080	-0.552
AT1G78180	-0.552
AT2G32180	-0.552
AT5G24420	-0.552
AT1G09130	-0.552
AT5G19450	-0.552
AT1G11860	-0.552
AT5G67390	-0.552
AT1G73630	-0.553
AT2G45300	-0.553
AT5G11270	-0.553
AT4G27700	-0.554
AT2G39700	-0.554
AT2G12400	-0.554
AT1G45130	-0.554
AT1G20020	-0.554
AT1G50370	-0.555
AT1G12450	-0.555
AT1G20810	-0.555
AT3G09860	-0.556
AT5G45820	-0.557
AT3G08920	-0.557
AT5G62790	-0.557
AT3G60390	-0.557
AT4G39770	-0.557
AT5G22650	-0.557
AT3G10405	-0.558
AT2G29310	-0.558
AT4G26520	-0.558
AT1G71810	-0.559
AT1G48620	-0.559
AT5G04830	-0.559
AT4G00740	-0.56
AT3G04940	-0.56
AT1G74690	-0.56
AT4G05410	-0.56
AT5G64380	-0.56
AT1G38950	-0.56
AT4G28730	-0.561
AT5G54600	-0.561
AT3G07460	-0.561
AT1G63550	-0.561
AT5G17840	-0.561
AT1G06290	-0.561
AT3G10525	-0.562
AT5G17920	-0.562
AT5G38480	-0.563
AT3G20790	-0.563
AT1G10200	-0.563
AT4G09040	-0.563
AT1G72430	-0.564
AT5G58600	-0.564
AT2G34460	-0.564
AT4G10030	-0.564
AT1G12090	-0.564
AT1G49975	-0.564
AT1G67400	-0.564
AT3G10370	-0.564
AT1G17200	-0.565
AT3G51280	-0.565
AT5G45610	-0.565
AT3G05640	-0.565
AT1G23080	-0.566
AT5G60670	-0.566
AT1G15260	-0.566
AT2G14880	-0.566
AT1G07750	-0.567
AT1G24020	-0.567
AT1G26560	-0.567
AT1G15930	-0.568
AT4G12390	-0.568
AT3G19340	-0.568
AT5G63380	-0.568
AT4G14160	-0.568
AT1G28440	-0.568
AT5G66410	-0.568
AT5G57960	-0.568
AT1G25230	-0.568
AT5G41140	-0.569
AT3G10670	-0.569
AT1G02690	-0.569
AT1G29660	-0.569
AT4G16155	-0.569
AT1G73470	-0.569
AT3G05410	-0.57
AT4G26230	-0.57
AT5G63040	-0.57
AT2G47450	-0.57
AT5G02740	-0.57
AT5G62670	-0.57
AT1G68960	-0.57
AT2G47910	-0.57
AT4G38690	-0.57
AT1G63170	-0.57
AT2G15970	-0.571
AT1G78630	-0.571
AT1G26920	-0.571
AT5G66580	-0.571
AT3G01790	-0.572
AT1G54770	-0.572
AT1G72040	-0.572
AT1G20630	-0.572
AT3G04550	-0.573
AT1G12800	-0.573
AT1G29840	-0.573
AT3G62740	-0.573
AT3G28860	-0.573
AT5G42420	-0.573
AT3G23620	-0.574
AT1G71720	-0.574
AT4G01150	-0.575
AT5G22440	-0.575
AT1G30520	-0.575
AT5G45590	-0.575
AT4G28600	-0.575
AT5G43750	-0.575
AT1G31070	-0.575
AT2G36410	-0.575
AT3G55350	-0.575
AT4G11010	-0.575
AT3G63250	-0.576
AT4G01900	-0.576
AT1G78580	-0.576
AT3G55280	-0.576
AT1G62390	-0.576
AT1G25420	-0.576
AT5G12960	-0.576
AT2G20890	-0.576
AT2G33620	-0.577
AT3G61520	-0.577
AT4G32830	-0.577
AT4G30580	-0.577
AT1G14590	-0.578
AT4G25600	-0.578
AT1G02350	-0.579
AT5G28750	-0.579
AT5G49100	-0.579
AT3G50440	-0.579
AT2G20690	-0.58
AT5G05000	-0.58
AT1G65010	-0.581
AT1G14710	-0.581
AT2G29570	-0.581
AT3G44716	-0.581
AT3G02870	-0.581
AT1G09490	-0.581
AT5G45775	-0.581
AT1G64510	-0.581
AT5G65340	-0.581
AT5G07460	-0.581
AT2G39900	-0.582
AT3G48420	-0.582
AT5G44600	-0.582
AT4G26370	-0.582
AT2G38050	-0.583
AT1G13090	-0.583
AT5G51200	-0.583
AT4G31050	-0.583
AT5G59250	-0.583
AT1G54790	-0.583
AT1G70600	-0.584
AT1G08750	-0.584
AT4G38420	-0.584
AT3G20320	-0.584
AT5G63140	-0.584
AT3G48460	-0.585
AT5G25754	-0.585
AT2G39870	-0.585
AT4G34490	-0.585
AT5G38060	-0.585
AT2G18570	-0.585
AT5G15390	-0.586
AT1G69523	-0.586
AT4G27820	-0.586
AT2G37190	-0.586
AT1G13930	-0.587
AT5G02710	-0.587
AT3G57220	-0.587
AT3G44320	-0.587
AT2G24050	-0.588
AT2G25180	-0.588
AT3G21190	-0.588
AT3G51950	-0.589
AT4G27440	-0.589
AT3G20100	-0.589
AT1G12250	-0.589
AT1G07620	-0.59
AT1G03110	-0.59
AT4G23900	-0.591
AT5G59350	-0.591
AT1G14900	-0.591
AT3G43400	-0.591
AT3G06880	-0.591
AT5G50370	-0.591
AT1G10370	-0.591
AT3G26700	-0.591
AT2G38360	-0.591
AT3G09300	-0.592
AT5G35170	-0.592
AT1G64860	-0.592
AT5G16810	-0.592
AT1G48830	-0.592
AT5G52190	-0.593
AT3G02180	-0.593
AT1G68590	-0.593
AT1G35340	-0.593
AT1G23800	-0.593
AT3G59870	-0.594
AT1G54820	-0.594
AT4G11175	-0.594
AT3G14240	-0.595
AT5G12050	-0.595
AT2G26260	-0.596
AT4G22930	-0.596
AT3G08730	-0.596
AT1G73110	-0.596
AT3G61770	-0.596
AT5G20070	-0.596
AT1G32090	-0.596
AT5G01920	-0.597
AT3G19980	-0.597
AT1G48570	-0.597
AT2G14660	-0.598
AT4G25960	-0.598
AT5G59970	-0.599
AT4G14040	-0.599
AT5G63980	-0.599
AT3G14230	-0.599
AT5G55070	-0.599
AT1G70850	-0.6
AT3G49670	-0.6
AT1G29460	-0.6
AT4G14030	-0.601
AT4G03190	-0.602
AT2G19880	-0.602
AT5G66590	-0.602
AT3G58100	-0.602
aTc12	-0.602
AT4G16980	-0.602
AT4G17600	-0.602
AT1G31410	-0.602
AT2G29390	-0.602
AT2G30432	-0.603
AT2G21960	-0.603
AT3G18850	-0.603
AT1G18470	-0.603
AT1G48460	-0.604
AT5G46240	-0.605
AT4G23770	-0.605
AT1G09160	-0.605
AT5G22880	-0.605
AT2G21330	-0.605
AT3G62020	-0.605
AT4G29400	-0.605
AT1G33811	-0.605
AT2G34300	-0.605
AT2G35780	-0.606
AT1G72310	-0.606
AT1G75760	-0.606
AT5G62270	-0.606
AT5G48460	-0.607
AT1G09580	-0.607
AT1G22335	-0.607
AT4G02920	-0.607
AT5G13510	-0.607
AT3G58850	-0.608
AT1G80080	-0.608
AT1G66100	-0.608
AT2G20635	-0.608
AT1G60600	-0.609
AT3G42150	-0.609
AT2G01755	-0.609
AT4G37760	-0.609
AT3G20070	-0.61
AT2G42300	-0.61
AT4G39460	-0.61
AT1G27480	-0.61
AT1G32200	-0.61
AT4G38840	-0.61
AT1G75690	-0.61
AT1G22340	-0.611
AT3G11200	-0.611
AT5G04900	-0.611
AT5G24155	-0.611
AT5G01460	-0.612
AT2G26580	-0.612
AT1G53040	-0.612
AT3G45780	-0.612
AT5G40650	-0.612
AT4G39795	-0.612
AT4G01130	-0.613
AT3G28290	-0.613
AT5G22260	-0.613
AT1G22590	-0.614
AT3G51480	-0.614
AT3G48540	-0.615
AT5G04600	-0.616
AT1G78300	-0.616
AT4G30800	-0.616
AT1G18170	-0.616
AT5G13430	-0.616
AT4G01410	-0.616
AT1G29390	-0.617
AT3G45350	-0.617
AT3G50820	-0.617
AT5G48840	-0.617
AT1G07790	-0.617
AT1G73840	-0.618
AT5G52310	-0.619
AT4G23490	-0.619
AT2G26640	-0.619
AT3G14810	-0.619
AT3G62700	-0.62
AT1G07930	-0.62
AT1G15710	-0.62
AT3G14770	-0.62
AT5G06980	-0.62
AT4G30996	-0.62
AT2G23755	-0.62
AT2G26830	-0.621
AT3G50270	-0.622
AT3G27690	-0.622
AT2G01918	-0.622
AT1G28670	-0.622
AT1G66430	-0.623
AT5G09995	-0.623
AT3G17640	-0.623
AT4G22830	-0.623
AT2G15430	-0.624
AT2G27130	-0.624
AT2G43535	-0.625
AT2G35010	-0.626
AT1G12310	-0.626
AT1G75680	-0.626
AT1G65295	-0.628
AT5G27930	-0.628
AT3G20230	-0.628
AT5G61770	-0.628
AT1G50490	-0.628
AT5G55280	-0.628
AT1G65150	-0.629
AT1G08890	-0.629
AT2G33800	-0.629
AT3G28130	-0.629
AT1G71270	-0.63
AT1G48350	-0.63
AT5G18410	-0.631
AT1G70820	-0.631
AT3G06750	-0.631
AT1G68260	-0.631
AT4G29720	-0.632
AT2G45560	-0.632
AT4G09350	-0.633
AT5G10620	-0.633
AT4G00430	-0.633
AT1G30440	-0.633
AT3G01410	-0.634
AT2G42130	-0.634
AT1G54580	-0.634
AT5G45940	-0.635
AT5G09820	-0.635
AT1G78100	-0.635
AT2G47370	-0.635
AT1G43580	-0.635
AT5G41600	-0.635
AT3G06680	-0.636
AT1G51500	-0.636
AT5G40830	-0.636
AT1G03630	-0.636
AT5G61410	-0.636
AT2G13950	-0.637
AT1G13320	-0.637
AT3G44590	-0.638
AT3G16950	-0.638
AT2G47240	-0.638
AT3G07270	-0.638
AT4G37000	-0.638
AT1G58380	-0.638
AT5G27440	-0.638
AT3G54910	-0.639
AT5G17160	-0.639
AT2G31610	-0.639
AT5G10480	-0.639
AT5G55050	-0.639
AT1G14410	-0.64
AT5G45040	-0.64
AT2G35040	-0.641
AT4G34610	-0.641
AT5G11450	-0.641
AT1G14430	-0.642
AT4G24960	-0.643
AT1G76090	-0.643
AT1G09310	-0.643
AT4G23820	-0.644
AT4G18810	-0.644
AT1G66760	-0.644
AT1G78020	-0.644
AT3G25520	-0.644
AT1G22330	-0.645
AT1G73390	-0.645
AT1G15340	-0.645
AT5G28500	-0.645
AT1G29980	-0.645
AT5G14910	-0.645
AT1G32990	-0.645
AT3G02750	-0.645
AT4G24770	-0.646
AT4G33480	-0.646
AT1G31160	-0.648
AT5G17630	-0.648
AT3G58990	-0.648
AT2G46780	-0.648
AT5G35740	-0.648
AT1G14350	-0.649
AT1G21790	-0.649
AT4G17550	-0.65
AT2G36570	-0.65
AT3G14220	-0.65
AT3G03630	-0.65
AT3G57180	-0.65
AT3G22415	-0.651
AT5G22500	-0.651
AT5G20410	-0.651
AT5G64850	-0.652
AT1G72250	-0.652
AT1G53300	-0.652
AT4G34160	-0.652
AT4G21280	-0.652
AT5G06290	-0.652
AT3G59040	-0.653
AT4G35100	-0.653
AT5G20970	-0.653
AT2G40920	-0.653
AT5G38540	-0.653
AT5G20920	-0.654
AT1G31690	-0.654
AT5G19690	-0.654
AT4G33760	-0.654
AT2G37620	-0.655
AT5G52320	-0.655
AT2G33450	-0.655
AT5G08580	-0.655
AT5G36710	-0.656
AT3G48200	-0.656
AT5G16970	-0.656
AT2G22250	-0.657
AT1G60160	-0.657
AT5G48920	-0.658
AT1G26450	-0.658
AT1G03420	-0.658
AT3G05020	-0.658
AT5G22580	-0.658
AT4G17560	-0.658
AT1G01300	-0.659
AT3G16250	-0.659
AT4G19120	-0.66
AT3G57810	-0.661
AT1G30530	-0.661
AT3G12685	-0.661
AT4G00370	-0.662
AT4G37040	-0.662
AT3G63510	-0.662
AT3G16850	-0.663
AT1G77990	-0.663
AT5G48230	-0.663
AT1G09390	-0.664
AT1G64355	-0.664
AT1G43690	-0.664
AT1G24764	-0.665
AT3G06950	-0.665
AT1G29490	-0.665
AT3G49470	-0.666
AT2G21370	-0.666
AT2G46810	-0.666
AT3G01500	-0.666
AT1G07070	-0.666
AT1G55140	-0.667
AT1G19150	-0.667
AT4G00400	-0.667
AT5G23920	-0.667
AT5G26330	-0.668
AT5G60600	-0.668
AT1G68540	-0.668
AT1G77690	-0.668
AT4G10480	-0.668
AT5G64680	-0.669
AT1G53650	-0.669
AT5G25100	-0.67
AT2G38140	-0.67
AT3G61820	-0.67
AT4G38860	-0.67
AT2G18160	-0.67
AT1G57980	-0.671
AT4G29020	-0.671
AT1G69160	-0.671
AT3G28040	-0.672
AT5G17900	-0.672
AT4G35090	-0.672
AT2G30790	-0.673
AT2G23000	-0.673
AT5G11590	-0.673
AT5G13400	-0.673
AT1G32550	-0.673
AT2G25840	-0.673
AT1G14250	-0.673
AT5G04950	-0.673
AT4G03150	-0.674
AT4G34980	-0.674
AT5G63100	-0.674
AT2G34560	-0.674
AT4G12420	-0.674
AT3G10940	-0.674
AT3G29280	-0.675
AT4G14210	-0.675
AT1G25450	-0.675
AT1G19920	-0.676
AT5G61240	-0.676
AT2G44740	-0.676
AT5G67180	-0.676
AT3G20680	-0.677
AT3G44735	-0.677
AT2G43800	-0.677
AT1G63680	-0.678
AT5G02230	-0.678
AT3G57320	-0.679
AT1G62560	-0.679
AT1G14270	-0.679
AT5G17670	-0.679
AT1G18590	-0.679
AT5G28490	-0.68
AT3G60720	-0.68
AT2G17410	-0.68
AT1G13810	-0.68
AT1G12920	-0.68
AT4G27640	-0.681
AT1G04800	-0.681
AT4G01050	-0.682
AT5G11150	-0.682
AT3G18000	-0.682
AT5G16000	-0.682
AT5G07110	-0.683
AT3G56630	-0.684
AT1G54217	-0.684
AT1G54385	-0.684
AT5G17660	-0.684
AT1G02950	-0.686
AT1G62800	-0.686
AT1G52910	-0.686
AT3G63140	-0.686
AT1G65060	-0.686
AT5G40380	-0.687
AT4G04630	-0.687
AT5G60840	-0.687
AT5G67150	-0.687
AT5G57170	-0.688
AT1G16020	-0.689
AT2G40590	-0.689
AT5G07630	-0.69
AT4G29610	-0.69
AT1G12244	-0.69
AT5G14920	-0.691
AT1G77060	-0.691
AT3G44160	-0.692
AT1G57680	-0.693
AT1G01080	-0.693
AT4G34900	-0.693
AT4G24510	-0.694
AT5G18060	-0.694
AT5G61130	-0.694
AT5G58250	-0.694
AT5G62430	-0.695
AT1G34010	-0.696
AT4G29360	-0.697
AT4G28050	-0.697
AT1G11870	-0.697
AT2G32650	-0.697
AT2G46710	-0.698
AT4G14870	-0.698
AT2G33180	-0.698
AT3G06980	-0.699
AT5G13470	-0.699
AT4G39970	-0.7
AT1G80560	-0.7
AT4G24750	-0.7
AT5G15210	-0.7
AT5G06390	-0.701
AT1G26210	-0.701
AT5G05890	-0.702
AT4G30650	-0.702
AT1G47540	-0.702
AT3G07320	-0.703
AT4G36390	-0.703
AT2G26800	-0.703
AT2G43560	-0.704
AT1G12860	-0.704
AT1G63980	-0.704
AT1G70580	-0.705
AT5G65730	-0.705
AT1G69700	-0.705
AT5G62920	-0.705
AT5G27330	-0.705
AT1G31190	-0.706
AT5G61660	-0.706
AT5G52420	-0.706
AT3G03780	-0.706
AT1G70280	-0.707
AT1G78040	-0.707
AT5G10920	-0.707
AT5G61420	-0.707
AT5G61200	-0.707
AT1G55340	-0.707
AT4G23740	-0.708
AT5G55960	-0.708
AT3G49260	-0.709
AT3G57040	-0.709
AT1G70370	-0.709
AT3G55760	-0.709
AT1G51805	-0.709
AT3G53700	-0.71
AT2G20750	-0.71
AT4G18030	-0.711
AT1G67730	-0.711
AT3G53190	-0.711
AT1G27460	-0.711
AT3G21670	-0.711
AT3G15190	-0.712
AT1G21880	-0.713
AT3G52940	-0.713
AT3G60900	-0.713
AT1G67660	-0.713
AT3G20130	-0.714
AT5G58870	-0.714
AT1G01970	-0.714
AT4G23500	-0.714
AT3G43600	-0.714
AT5G19090	-0.715
AT5G02760	-0.715
AT5G58420	-0.716
AT2G28470	-0.716
AT1G52280	-0.717
AT3G46740	-0.717
AT4G35335	-0.717
AT4G15620	-0.718
AT4G37920	-0.719
AT1G11670	-0.719
AT5G24800	-0.719
AT3G56370	-0.719
AT4G33740	-0.72
AT1G10670	-0.72
AT1G76020	-0.72
AT1G11840	-0.721
AT5G58260	-0.721
AT2G17630	-0.721
AT1G51110	-0.722
AT3G52110	-0.722
AT1G04420	-0.723
AT5G03760	-0.723
AT4G27430	-0.723
AT1G23740	-0.724
AT2G31410	-0.724
AT2G05790	-0.725
AT1G48330	-0.725
AT5G46110	-0.725
AT4G15630	-0.726
AT1G76540	-0.728
AT1G12240	-0.728
AT4G09500	-0.729
AT4G09650	-0.729
AT4G29080	-0.729
AT1G58290	-0.729
AT4G16442	-0.73
AT2G44230	-0.73
AT1G08560	-0.731
AT5G51010	-0.731
AT5G20890	-0.731
AT4G37450	-0.732
AT5G20720	-0.732
AT5G03940	-0.732
AT2G34490	-0.733
AT2G35410	-0.733
AT3G27200	-0.733
AT5G23060	-0.733
AT2G31270	-0.734
AT5G21100	-0.735
AT2G32280	-0.735
AT5G47190	-0.735
AT1G24510	-0.736
AT2G45190	-0.736
AT5G14570	-0.736
AT1G29420	-0.736
AT5G27640	-0.736
AT3G13120	-0.736
AT3G01700	-0.738
AT3G08680	-0.738
AT4G32770	-0.738
AT3G19170	-0.739
AT2G32500	-0.739
AT5G18290	-0.739
AT4G39330	-0.741
AT1G78915	-0.742
AT5G53860	-0.742
AT5G14660	-0.742
AT4G36195	-0.742
AT2G42570	-0.743
AT4G01310	-0.743
AT2G47840	-0.743
AT4G30890	-0.744
AT1G05430	-0.744
AT3G12610	-0.744
AT4G15920	-0.744
AT1G22530	-0.744
AT1G29530	-0.745
AT2G30600	-0.745
AT3G06770	-0.747
AT2G12462	-0.747
AT1G64770	-0.748
AT5G47770	-0.748
AT3G23760	-0.748
AT4G29140	-0.748
AT1G59610	-0.75
AT2G14860	-0.75
AT5G64150	-0.751
AT5G35360	-0.751
AT2G14260	-0.751
AT5G62550	-0.751
AT1G04240	-0.752
AT4G21215	-0.753
AT5G52920	-0.753
AT5G07020	-0.754
AT1G24170	-0.756
AT3G28760	-0.756
AT4G30620	-0.756
AT5G08650	-0.757
AT4G35950	-0.757
AT1G74670	-0.757
AT2G02500	-0.757
AT5G08330	-0.759
AT4G28706	-0.759
AT1G20440	-0.759
AT4G12970	-0.76
AT3G03840	-0.76
AT1G62190	-0.761
AT5G02940	-0.762
AT1G78880	-0.762
AT5G17700	-0.762
AT2G42120	-0.763
AT1G08000	-0.764
AT1G41830	-0.765
AT1G03600	-0.765
AT2G35860	-0.766
AT4G23940	-0.766
AT1G54730	-0.767
AT4G10380	-0.768
AT1G79460	-0.768
AT1G78170	-0.769
AT5G19740	-0.77
AT3G54690	-0.77
AT2G42530	-0.771
AT2G16580	-0.771
AT1G74970	-0.772
AT1G51090	-0.772
AT4G01580	-0.773
AT1G72480	-0.773
AT5G60490	-0.773
AT5G20060	-0.774
AT2G27385	-0.774
AT1G78260	-0.774
AT5G58330	-0.775
AT2G19170	-0.776
AT2G19650	-0.776
AT4G17360	-0.776
AT4G27030	-0.777
AT5G65390	-0.777
AT5G41050	-0.777
AT2G01890	-0.778
AT5G63810	-0.778
AT1G55890	-0.778
AT5G23575	-0.779
AT1G45010	-0.78
AT1G17840	-0.78
AT4G20430	-0.781
AT1G76240	-0.782
AT3G28220	-0.782
AT2G47440	-0.782
AT4G35250	-0.782
AT2G41820	-0.783
AT2G35120	-0.783
AT4G12910	-0.783
AT4G34730	-0.784
AT2G21140	-0.784
AT2G32560	-0.784
AT5G48360	-0.785
AT3G47520	-0.786
AT2G22990	-0.786
AT5G47490	-0.787
AT5G52010	-0.787
AT1G21480	-0.788
AT2G18990	-0.789
AT5G11880	-0.79
AT3G61550	-0.791
AT5G53490	-0.791
AT5G05270	-0.791
AT3G20015	-0.792
AT1G04350	-0.793
AT2G10940	-0.794
AT3G05800	-0.794
AT5G17710	-0.795
AT3G17100	-0.795
AT5G35220	-0.795
AT3G02110	-0.795
AT2G41340	-0.795
AT4G35840	-0.797
AT3G63200	-0.797
AT1G69420	-0.798
AT3G16370	-0.798
AT1G73760	-0.798
AT1G80480	-0.798
AT5G55220	-0.798
AT1G29395	-0.798
AT2G33330	-0.801
AT5G05590	-0.802
AT1G19940	-0.802
AT5G18050	-0.802
AT5G64460	-0.803
AT5G18030	-0.805
AT1G77870	-0.805
AT3G48500	-0.806
AT3G09540	-0.806
AT1G10640	-0.806
AT2G06850	-0.807
AT5G23840	-0.807
AT5G59290	-0.807
AT1G17650	-0.807
AT1G70410	-0.807
AT5G64080	-0.807
AT1G62510	-0.808
AT1G04040	-0.808
AT1G14290	-0.809
AT3G17390	-0.81
AT5G39860	-0.81
AT1G72640	-0.81
AT1G60060	-0.811
AT1G64980	-0.811
AT3G16690	-0.812
AT2G31790	-0.813
AT1G65900	-0.813
AT1G69200	-0.813
AT2G13610	-0.814
AT5G44190	-0.815
AT1G29500	-0.816
AT1G14700	-0.817
AT2G42710	-0.817
AT2G28900	-0.817
AT2G17340	-0.817
AT2G19780	-0.818
AT5G18660	-0.819
AT3G16960	-0.819
AT4G37510	-0.821
AT3G18390	-0.821
AT5G37360	-0.822
AT2G23670	-0.822
AT4G24280	-0.825
AT3G05910	-0.826
AT5G26570	-0.826
AT5G62220	-0.826
AT1G16410	-0.827
AT5G36170	-0.827
AT3G53560	-0.828
AT3G01440	-0.829
AT1G78060	-0.83
AT5G12110	-0.83
AT3G16420	-0.831
AT3G45430	-0.832
AT1G14030	-0.832
AT3G53900	-0.834
AT3G12700	-0.834
AT4G26510	-0.834
AT2G22230	-0.835
AT2G02740	-0.836
AT1G51080	-0.836
AT2G05830	-0.837
AT5G08050	-0.837
AT4G27435	-0.837
AT5G44130	-0.838
AT4G22010	-0.838
AT5G22340	-0.838
AT1G52410	-0.838
AT1G51060	-0.839
AT3G43720	-0.839
AT3G03190	-0.84
AT3G56090	-0.841
AT1G70640	-0.842
AT1G01120	-0.842
AT4G12320	-0.843
AT3G18190	-0.843
AT2G28100	-0.843
AT1G09750	-0.844
AT2G09865	-0.846
AT5G39210	-0.846
AT3G32980	-0.846
AT2G16990	-0.847
AT1G53290	-0.847
AT5G35490	-0.847
AT3G51870	-0.847
AT3G49080	-0.848
AT1G79500	-0.849
AT4G04750	-0.849
AT5G51890	-0.85
AT5G05180	-0.85
AT1G17190	-0.852
AT1G79510	-0.853
AT5G53250	-0.853
AT2G35960	-0.853
AT1G12845	-0.854
AT1G60590	-0.854
AT1G06980	-0.854
AT5G46600	-0.856
AT3G52370	-0.856
AT3G61220	-0.857
AT3G18890	-0.857
AT5G08610	-0.858
AT1G77580	-0.858
AT5G27780	-0.859
AT5G06270	-0.86
AT5G55740	-0.861
AT5G23310	-0.861
AT1G67830	-0.861
AT4G23400	-0.863
AT1G60850	-0.865
AT5G67070	-0.865
AT2G26690	-0.867
AT5G51545	-0.867
AT5G10430	-0.867
AT4G03070	-0.869
AT1G52750	-0.87
AT5G36910	-0.871
AT5G44020	-0.873
AT3G03820	-0.874
AT1G75900	-0.876
AT5G07080	-0.877
AT5G50950	-0.877
AT2G32640	-0.877
AT4G17190	-0.878
AT2G19670	-0.878
AT1G47670	-0.878
AT3G11630	-0.879
AT2G43550	-0.881
AT5G63530	-0.882
AT4G12030	-0.882
AT3G16240	-0.882
AT1G11430	-0.883
AT5G58310	-0.884
AT1G26100	-0.885
AT4G29510	-0.886
AT3G10080	-0.886
AT2G39330	-0.886
AT2G42540	-0.887
AT1G50900	-0.887
AT2G17300	-0.887
AT2G35970	-0.887
AT4G33000	-0.888
AT5G26670	-0.89
AT1G45201	-0.891
AT1G14345	-0.893
AT3G19820	-0.894
AT1G29430	-0.895
AT1G02180	-0.895
AT2G21650	-0.895
AT5G48900	-0.896
AT5G65470	-0.896
AT1G11740	-0.898
AT1G54970	-0.9
AT4G12730	-0.9
AT1G74090	-0.901
AT4G02790	-0.902
AT4G34260	-0.904
AT4G24275	-0.904
AT1G09350	-0.906
AT4G34290	-0.907
AT4G26670	-0.908
AT5G62360	-0.908
AT3G15850	-0.909
AT2G44040	-0.91
AT5G49730	-0.911
AT5G62140	-0.912
AT1G52190	-0.912
AT1G56050	-0.914
AT3G17120	-0.915
AT1G04250	-0.916
AT2G36145	-0.917
AT2G31040	-0.917
AT3G12145	-0.92
AT5G15780	-0.92
AT5G50730	-0.921
AT1G36390	-0.921
AT3G52150	-0.921
AT1G54050	-0.922
AT1G02280	-0.924
AT5G42100	-0.924
AT2G35500	-0.925
AT5G56530	-0.926
AT3G55420	-0.926
AT1G78450	-0.926
AT1G74890	-0.926
AT5G02890	-0.926
AT5G63570	-0.927
AT4G38160	-0.927
AT2G21220	-0.93
AT3G63170	-0.931
AT1G29450	-0.932
AT3G52900	-0.936
AT5G23750	-0.936
AT3G13510	-0.938
AT4G35300	-0.94
AT5G17220	-0.943
AT5G65810	-0.944
AT5G03130	-0.944
AT1G19450	-0.947
AT3G17350	-0.949
AT2G40530	-0.951
AT1G53035	-0.952
AT5G42070	-0.952
AT3G11490	-0.952
AT3G43540	-0.957
AT2G37790	-0.959
AT5G01790	-0.959
AT4G27520	-0.959
AT2G22170	-0.96
AT2G01290	-0.961
AT1G58270	-0.963
AT1G73300	-0.963
AT3G21950	-0.964
AT4G38660	-0.966
AT2G45470	-0.967
AT1G20190	-0.967
AT2G16630	-0.968
AT3G14390	-0.969
AT5G42240	-0.97
AT1G65860	-0.97
aTh-MIR16	-0.971
AT2G42610	-0.975
AT1G72230	-0.975
AT3G09880	-0.979
AT1G67750	-0.98
[truncated: 2,981 more rows]
[truncated: 5 more columns]
