# Supplementary material for: Molecular Signatures in Arabidopsis thaliana in Response to Insect Attack and Bacterial Infection
Source: PLoS One. 2013 Mar 25;8(3):e58987. doi: 10.1371/journal.pone.0058987 (PMC3607608; doi:10.1371/journal.pone.0058987)
Supplement: File S5 — MapMan input file for all P. syringae-responsive genes and corresponding log2-transformed expression values. (XLS) [file pone.0058987.s005.xls]

## Sheet: Sheet1
MapMan input file for all P. syringae-responsive genes and corresponding log2-transformed expression values.
Gene locus ID	LoG2 raTio
AT4G00810	-0.456
AT3G28040	-0.715
AT3G23030	-0.480
AT2G24150	-0.561
AT3G61070	0.585
AT1G07750	1.209
AT2G37450	-1.107
AT3G12340	-0.742
AT5G04230	-0.626
AT2G40460	0.545
AT1G66430	-1.173
AT5G49480	0.881
AT1G17745	1.676
AT4G01150	-0.948
AT2G34490	0.644
AT1G24170	-0.489
AT1G80440	-0.399
AT2G17972	-0.606
AT5G63990	1.017
AT1G08920	2.398
AT5G64940	-0.531
AT5G67490	0.960
AT5G66920	-0.606
AT3G02360	0.708
AT4G14430	0.525
AT2G45560	-0.642
AT5G66590	0.805
AT1G65690	1.236
AT3G19490	0.692
AT2G17760	0.767
AT1G03055	-1.011
AT5G62790	-0.519
AT5G51110	-0.768
AT2G44350	0.647
AT2G33150	1.709
AT2G25830	-0.576
AT4G22670	-0.439
AT2G20635	-1.351
AT5G47640	-0.668
AT3G56170	1.333
AT1G29450	-1.519
AT5G24420	1.835
AT5G60680	-0.428
AT1G18730	-0.967
AT4G33110	-0.625
AT4G06676	0.472
AT1G69850	-0.654
AT4G18050	1.296
AT2G29650	-0.480
AT1G77760	0.539
AT1G31830	0.784
AT1G09180	0.730
AT2G29940	3.143
AT4G34200	1.377
AT1G70700	1.635
AT3G05020	-0.746
AT1G15180	-1.078
AT4G29900	0.794
AT4G12830	-1.054
AT1G31160	-0.750
AT3G01510	-0.506
AT4G21280	-1.009
AT5G44650	-0.687
AT5G36700	-0.752
AT4G13430	0.448
AT5G08330	-0.694
AT1G26910	0.598
AT3G01440	-1.046
AT2G37250	0.583
AT1G53160	-1.032
AT3G08030	-0.751
AT2G43750	-0.602
AT1G53030	0.767
AT3G27170	0.871
AT5G19140	0.519
AT5G64700	-2.046
AT3G53810	0.911
AT1G29490	-1.453
AT3G55430	1.302
AT3G52960	-0.647
AT3G06500	2.283
AT1G25054	0.470
AT3G01480	-1.171
AT3G16250	-1.266
AT4G12780	0.446
AT3G21055	-0.589
AT3G02870	-0.662
AT4G09840	-0.666
AT2G43160	0.500
AT2G18090	0.819
AT5G03650	-0.569
AT3G53750	-0.791
AT5G46290	-0.696
AT2G10940	-1.189
AT2G25900	-1.257
AT4G30910	-0.432
AT3G01050	0.492
AT4G27570	0.739
AT5G19190	-0.939
AT1G48605	1.087
AT4G36240	-0.918
AT3G61550	-1.134
AT3G52360	-1.412
AT1G36640	1.047
AT4G39710	-0.732
AT5G05300	-1.029
AT4G17230	0.886
AT1G53470	2.367
AT5G64620	-0.766
AT5G12470	-0.445
AT5G46760	0.574
AT5G20720	-0.644
AT4G33220	-1.049
AT3G25150	0.641
AT1G69935	-0.529
AT5G63190	0.631
AT5G26330	-0.612
AT3G15790	0.594
AT1G13280	0.686
AT2G41290	-1.036
AT3G03310	0.878
AT1G78450	-1.183
AT3G53850	-0.474
AT1G05570	0.624
AT4G21910	0.783
AT3G20410	0.829
AT1G54100	2.135
AT4G35220	0.468
AT5G51010	-0.603
AT5G65700	-0.572
AT2G18960	0.778
AT2G17500	2.911
AT3G17000	0.555
AT5G47190	-0.984
AT1G78830	-0.700
AT2G44580	1.859
AT1G35680	-0.816
AT5G57655	1.984
AT2G26250	-0.926
AT4G30530	0.821
AT4G01870	0.949
AT3G05570	0.451
AT1G33810	-0.447
AT5G54510	2.433
AT4G34310	0.571
AT5G61590	-0.742
AT3G55646	-0.920
AT2G35980	1.052
AT1G22590	-1.170
AT4G35320	-1.334
AT2G32200	1.559
AT5G44020	-1.066
AT2G23590	-0.595
AT4G18740	-0.604
AT4G24340	1.175
AT3G52840	-0.395
AT1G70230	0.584
AT5G15190	0.772
AT2G24850	2.042
AT5G54840	0.622
AT4G27280	-0.973
AT3G44880	1.326
AT5G18080	-1.497
AT1G05120	0.534
AT5G10160	-0.756
AT2G03550	-0.505
AT4G12120	0.697
AT5G13420	0.597
AT3G11230	0.749
AT3G44890	-0.655
AT2G19570	1.518
AT1G78580	-0.645
AT2G35690	1.236
AT1G03160	-0.451
AT4G26530	-2.228
AT5G32440	0.668
AT4G24380	0.759
AT2G21340	-0.504
AT4G37390	2.073
AT3G61200	0.691
AT3G63010	1.237
AT5G59970	-0.854
AT1G15520	1.538
AT2G41250	0.707
AT3G53930	0.539
AT5G52510	-0.434
AT2G19860	-0.494
AT2G01450	0.747
AT3G56200	0.916
AT2G18790	0.720
AT2G29460	1.810
AT4G21750	-0.622
AT1G63010	0.611
AT1G54340	0.715
AT3G02480	2.472
AT4G33666	-0.996
AT5G22090	-0.466
AT5G44580	-0.585
AT1G60800	-0.706
AT3G56310	0.654
AT1G09750	-0.946
AT5G17290	0.630
AT5G01010	0.475
AT5G08650	-0.920
AT5G42890	0.768
AT3G48890	0.807
AT1G51060	-0.605
AT5G41800	0.425
AT1G78020	-0.656
AT1G72680	1.315
AT5G25980	0.487
AT5G52060	-0.870
AT3G02260	0.421
AT1G73840	-0.561
AT5G19540	0.409
AT4G12980	-1.462
AT5G62220	-0.841
AT5G26000	-0.612
AT5G66930	0.520
AT5G62840	-0.843
AT5G50760	3.281
AT2G27385	-1.115
AT4G09010	-0.739
AT2G25850	0.453
AT2G33450	-1.138
AT4G24700	-0.733
AT3G19720	-0.758
AT1G33030	1.479
AT1G10030	-0.862
AT5G30510	-0.850
AT2G45970	-0.886
AT3G53370	1.708
AT1G32370	0.460
AT4G27600	-0.607
AT1G51500	-1.197
AT1G07720	-0.622
AT3G18950	0.975
AT5G03630	0.600
AT5G57910	0.851
AT3G52870	0.905
AT1G75220	1.565
AT2G38750	2.658
AT1G33490	0.503
AT4G21680	3.122
AT3G51140	-0.693
AT2G15050	-1.284
AT1G19397	0.655
AT3G21390	-0.487
AT4G30630	0.584
AT2G24210	3.259
AT5G15580	-0.524
AT2G05440	2.381
AT3G08670	0.781
AT2G42540	-1.138
AT1G18360	-1.580
AT2G41010	-0.546
AT5G27600	0.785
AT1G68530	-0.707
AT4G40045	-0.562
AT1G21910	-1.083
AT4G23700	1.977
AT3G17390	-0.745
AT5G57030	-1.207
AT3G03910	-0.639
AT5G40380	-0.600
AT1G80380	-1.005
AT4G24280	-0.600
AT4G15210	3.444
AT1G32550	-0.734
AT2G38760	2.546
AT5G46580	-0.505
AT4G21860	-0.536
AT5G17170	-0.742
AT4G27300	-0.836
AT3G55130	0.705
AT4G36060	1.262
AT3G55240	-2.331
AT1G62380	0.561
AT1G32860	0.630
AT1G47128	0.788
AT1G34430	-0.575
AT1G55450	-0.662
AT1G70160	0.631
AT2G38040	-0.523
AT2G43630	-0.515
AT1G53560	1.071
AT5G56150	0.651
AT4G34920	0.381
AT2G18390	0.583
AT1G68570	0.938
AT5G40580	0.471
AT4G03030	0.865
AT4G06744	1.407
AT1G14150	-0.988
AT1G26670	0.725
AT5G64430	0.481
AT3G60130	1.938
AT1G66390	3.206
AT4G37800	-1.658
AT1G48600	-0.732
AT1G69870	1.287
AT1G67000	2.009
AT5G15650	0.770
AT5G26940	0.421
AT5G64150	-1.318
AT1G11350	-0.805
AT3G28007	1.336
AT4G28390	1.262
AT5G64260	1.259
AT2G23600	-0.519
AT3G14240	-0.606
AT5G14320	-0.642
AT2G32720	-0.618
AT3G53990	0.569
AT2G02930	0.812
AT5G19440	1.383
AT3G11480	3.609
AT3G54720	-1.088
AT1G54575	2.875
AT1G27760	0.625
AT1G10410	1.426
AT2G42760	0.657
AT4G18220	-0.727
AT1G64810	0.687
AT2G18730	0.451
AT3G48720	-1.623
AT3G10405	-0.839
AT2G35390	-0.860
AT2G26910	-0.855
AT5G55850	0.608
AT5G56760	0.870
AT1G29500	-1.673
AT2G11910	-0.545
AT2G12190	0.746
AT5G38290	-0.445
AT1G54130	0.788
AT1G56430	-1.170
AT1G64680	-1.070
AT3G19170	-0.809
AT2G32480	-0.511
AT4G28550	0.724
AT1G78240	0.564
AT1G62540	0.696
AT3G03900	-0.407
AT1G50575	-0.666
AT3G61130	-0.472
AT2G30200	-0.594
AT1G32520	-0.431
AT1G21110	-1.258
AT1G12750	-0.912
AT3G18080	1.415
AT1G09070	0.620
AT5G50920	0.628
AT1G54030	0.934
AT1G29040	0.449
AT1G77680	0.507
AT4G21930	0.722
AT5G23840	2.646
AT2G37640	-1.184
AT5G07090	-0.459
AT5G57860	0.546
AT5G19000	0.764
AT5G67480	1.453
AT1G16840	0.420
AT3G49940	-0.787
AT4G29040	0.569
AT1G23080	-0.766
AT5G40720	0.854
AT3G55770	0.536
AT3G26420	0.581
AT1G21400	1.335
AT1G21520	0.976
AT5G45890	2.407
AT5G38540	2.658
AT1G69930	2.074
AT5G19290	-0.940
AT1G14600	0.416
AT1G12810	0.613
AT5G24165	-0.427
AT3G03640	0.895
AT3G48530	0.945
AT5G63180	-1.097
AT2G38140	-0.884
AT4G20260	0.800
AT3G25597	0.823
AT3G54890	-0.651
AT1G28200	0.490
AT3G18820	0.481
AT2G23450	0.848
AT5G07440	2.560
AT2G01755	-1.010
AT5G50730	-0.966
AT2G35920	0.451
AT5G54500	0.623
AT4G34540	0.503
AT1G79450	1.960
AT1G68590	-1.211
AT5G50160	0.590
AT1G19715	-0.651
AT5G48400	1.130
AT4G01050	-0.665
AT5G29000	0.676
AT2G16720	1.625
AT4G14020	0.932
AT2G29350	3.099
AT5G04540	0.921
AT4G01060	-1.056
AT2G44940	-0.886
AT3G09650	-0.720
AT4G25890	-0.518
AT2G03420	-0.707
AT5G53970	0.568
AT4G01540	0.969
AT2G29490	1.368
AT1G44000	-0.674
AT1G11840	0.533
AT1G25400	0.931
AT3G11600	1.633
AT2G22860	1.810
AT1G72890	-0.615
AT1G51780	3.484
AT2G22670	-0.705
AT1G31820	0.803
AT5G04130	-0.532
AT4G01430	2.107
AT4G11211	-1.028
AT1G11410	-0.779
AT1G06640	1.815
AT1G67750	-1.760
AT4G01995	-0.535
AT2G22540	-0.661
AT3G05937	0.629
AT1G09340	-0.747
AT5G41050	-1.339
AT1G70580	-0.676
AT2G23610	-0.547
AT3G55040	-0.472
AT2G41100	-0.528
AT2G20260	-0.537
AT1G34420	0.624
AT2G26510	0.656
AT5G16120	0.853
AT1G08550	-0.854
AT1G52670	-0.409
AT2G45290	1.203
AT2G22200	1.494
AT4G13930	-0.468
AT5G20660	0.419
AT5G46240	0.429
AT3G50210	1.969
AT4G02200	-0.485
AT1G32470	-1.012
AT2G19620	-0.623
AT1G14700	-1.663
AT3G22425	-0.455
AT1G06110	0.563
AT5G02160	-1.117
AT3G49120	2.868
AT1G38065	-0.712
AT1G51760	2.591
AT1G04240	-0.540
AT5G44070	-0.667
AT1G47580	-0.769
AT2G26740	1.399
AT4G34220	-1.153
AT1G36050	0.510
AT3G50060	-0.952
AT4G38225	-0.503
AT2G46600	0.905
AT2G29470	3.410
AT5G61660	-0.853
AT2G46915	-0.468
AT4G08300	-0.467
AT5G47210	-0.467
AT5G16980	1.320
AT5G65110	1.288
AT2G07640	0.447
AT2G39000	0.467
AT2G47940	-0.841
AT1G54050	0.646
AT4G24350	1.470
AT5G47370	-0.648
AT1G10960	-0.551
AT4G26520	-0.676
AT1G73880	0.793
AT3G48520	2.882
AT5G01015	-1.314
AT1G78370	0.443
AT4G12730	-0.626
AT5G40370	0.671
AT4G17340	-0.569
AT4G11280	-0.851
AT1G23960	0.667
AT3G11910	0.473
AT1G19050	-1.207
AT4G18200	-1.313
AT4G24520	0.626
AT2G42320	-0.675
AT4G32590	-0.738
AT1G65980	0.523
AT4G11320	2.850
AT3G22104	-0.679
AT5G38900	1.275
AT3G08940	-0.705
AT2G04360	-0.401
AT1G32990	-0.946
AT2G40020	-0.932
AT2G24600	-0.561
AT4G29010	0.834
AT2G17033	-0.450
AT5G55460	0.639
AT3G26170	0.902
AT5G25770	1.644
AT1G08810	-0.635
AT5G54720	-0.997
AT2G47450	-0.736
AT1G27530	0.493
AT1G61180	0.570
AT5G43700	0.104
AT1G28290	-0.667
AT3G46600	-0.863
AT2G13440	-0.514
AT2G39350	1.516
AT4G20860	1.422
AT4G38860	-0.402
AT1G12320	0.995
AT5G22620	-0.641
AT3G15580	0.470
AT5G40240	1.789
AT5G44530	-1.355
AT2G45180	-0.838
AT1G64860	-0.685
AT1G59920	-0.575
AT2G37750	2.644
AT3G27160	-1.023
AT1G17420	0.969
AT4G27430	-0.701
AT5G60840	-1.060
AT1G02820	-1.056
AT1G73655	-1.040
AT3G19910	0.995
AT5G10380	1.413
AT1G70480	0.798
AT5G09440	1.513
AT1G08830	0.748
AT1G79440	1.200
AT3G17040	-0.438
AT4G32850	0.502
AT1G67860	0.617
AT1G23800	1.993
AT4G37020	-0.674
AT2G25450	1.485
AT4G35940	0.512
AT3G44870	1.333
AT3G25220	0.563
AT5G03610	1.332
AT1G53580	1.179
AT3G59210	0.536
AT4G14010	-0.537
AT2G44500	0.714
AT3G08990	1.371
AT3G59040	-0.434
AT2G45210	1.559
AT2G36885	-0.759
AT5G10400	-0.764
AT3G62950	-0.565
AT4G33565	0.663
AT3G55310	1.330
AT5G48490	-1.418
AT3G22260	0.785
AT3G05160	0.735
AT4G12490	2.063
AT3G52850	0.947
AT2G17695	-0.555
AT3G26200	1.226
AT2G03980	1.084
AT1G78230	0.520
AT1G10500	0.442
AT2G33770	0.384
AT5G01300	1.125
AT5G55710	-0.625
AT3G07760	0.724
AT4G12320	-1.113
AT2G47600	1.498
AT4G15560	-0.571
AT3G06810	1.216
AT4G20760	-0.836
AT2G26080	-0.501
AT3G58570	0.616
AT1G78680	0.957
AT4G13180	0.449
AT5G62720	-0.959
AT3G48450	1.554
AT3G16640	0.706
AT2G30040	0.824
AT4G26060	0.940
AT1G44575	-0.862
AT1G05190	-1.142
AT5G01850	1.063
AT1G16410	0.576
AT5G51190	-1.557
AT1G56220	-0.616
AT4G25420	-0.630
AT2G32900	0.444
AT5G48410	1.478
AT4G01080	1.213
AT4G12970	-1.606
AT3G15060	0.507
AT1G56010	0.341
AT5G66030	0.493
AT4G02790	-0.974
AT5G19330	0.586
AT1G03900	0.497
AT4G13850	0.486
AT5G56180	0.977
AT2G41180	-1.157
AT1G24020	-0.724
AT1G17140	-0.467
AT1G01790	-1.068
AT2G39050	1.564
AT2G15620	-1.124
AT1G80640	-1.264
AT4G33120	-0.522
AT3G09085	0.511
AT2G27395	-1.444
AT5G20270	-0.934
AT2G41870	-0.554
AT4G33780	0.542
AT5G19960	0.471
AT5G03330	0.549
AT1G78280	0.442
AT5G45680	-1.012
AT4G00370	-0.794
AT4G16590	4.854
AT3G21790	1.021
AT1G05100	2.428
AT5G49215	-0.604
AT1G13340	1.898
AT2G43510	3.685
AT4G26860	-0.482
AT2G46710	-1.352
AT3G18280	0.476
AT2G27290	-0.443
AT3G56910	-0.799
AT2G33340	0.502
AT5G24450	0.431
AT3G18050	-1.295
AT5G45930	-0.705
AT2G36000	-0.687
AT2G27680	-0.848
AT4G28570	0.560
AT4G13940	0.363
AT5G02110	-0.748
AT5G53930	0.506
AT1G10830	-0.467
AT3G48460	-1.869
AT2G04780	-1.020
AT1G77500	0.734
AT5G42560	0.484
AT1G64390	-1.349
AT2G26330	-0.701
AT1G74020	2.650
AT4G38460	0.563
AT2G43170	0.525
AT1G48100	-1.017
AT3G21580	-0.717
AT1G69830	-0.452
AT1G03090	0.852
AT5G16715	-0.545
AT3G44720	0.735
AT4G27260	1.332
AT5G21100	-0.792
AT1G54970	-1.875
AT5G60670	-0.578
AT5G67500	0.566
AT1G76570	-0.416
AT5G50100	0.366
AT3G62580	0.678
AT4G36250	-0.835
AT4G28730	-0.784
AT1G54040	0.952
AT2G32150	0.931
AT3G58610	-0.674
AT4G34550	-0.651
AT3G45130	2.868
AT1G20020	-0.933
AT3G50840	-0.532
AT3G24430	-0.785
AT5G24640	1.386
AT2G45450	0.611
AT4G09650	-0.626
AT1G15140	-0.481
AT1G19570	2.371
AT5G13550	1.079
AT3G20930	-0.758
AT1G74310	-0.446
AT2G30550	0.798
AT5G47550	-0.745
AT3G48850	1.086
AT1G20816	-0.490
AT1G26400	2.933
AT4G37520	1.435
AT1G03290	0.645
AT2G31390	0.707
AT5G55730	-1.219
AT5G53560	0.505
AT5G59220	2.482
AT2G13100	0.475
AT3G28300	4.288
AT2G01505	0.636
AT5G44130	-1.132
AT3G05120	1.260
AT3G48360	0.746
AT3G51820	-0.893
AT5G48385	0.416
AT5G19730	-1.220
AT2G45340	-0.539
AT2G22250	-0.879
AT4G25050	-0.808
AT5G20570	0.420
AT4G14880	0.515
AT3G13450	1.477
AT1G19150	-1.435
AT2G36835	-0.448
AT5G17630	-0.781
AT3G16950	-0.757
AT5G61810	0.441
AT2G39930	-0.434
AT3G01700	-1.404
AT3G05975	-0.870
AT1G44170	0.783
AT3G59780	-0.877
AT2G38510	0.728
AT5G59130	-1.960
AT1G04680	-1.130
AT1G19960	-1.113
AT1G22650	-0.869
AT2G32100	-0.534
AT5G54600	-0.616
AT1G75900	-1.274
AT2G03750	-0.461
AT1G35720	0.687
AT2G41350	-0.356
AT1G26240	0.620
AT4G26750	0.757
AT3G06580	0.674
Mir169e3_	-1.326
AT4G17500	0.501
AT1G12800	-0.677
AT3G46880	-0.927
AT4G23400	-0.759
AT1G74070	-1.369
AT3G60390	-0.975
AT5G67600	0.538
AT1G74520	-0.486
AT1G23140	0.924
AT4G15910	1.058
AT5G67245	0.847
AT1G20510	1.027
AT5G54390	1.109
AT1G78460	-1.404
AT2G34430	-1.254
AT5G60640	0.459
AT2G38610	0.572
AT3G15570	-1.443
AT5G36790	-0.718
AT4G00430	1.050
AT3G02460	0.544
AT1G58200	0.735
AT1G62750	-0.870
AT5G05210	0.880
AT1G29920	-0.956
AT3G06080	-0.690
AT1G33050	1.149
AT4G16690	1.220
AT2G26300	0.919
AT5G57510	2.643
AT3G14100	0.630
AT2G43910	-0.394
AT1G56190	-0.511
AT2G04700	-0.471
AT1G33720	-0.477
AT2G01490	0.728
AT1G68820	0.809
AT3G03770	-0.669
AT3G63410	-0.559
AT2G22690	0.548
AT1G23440	0.618
AT1G69610	1.340
AT5G03530	-0.716
AT1G29430	-1.621
AT4G10500	0.849
AT4G10120	-0.947
AT3G48610	-0.711
AT3G45640	-0.681
AT2G20690	-0.431
AT5G13330	3.945
AT5G64480	-0.577
AT1G80160	4.679
AT4G32250	1.228
AT5G14970	-0.764
AT4G12735	2.474
AT3G29575	1.365
AT4G33680	-0.494
AT3G03160	0.487
AT1G62960	-0.536
AT4G36400	0.674
AT1G10580	0.434
AT1G19950	-0.512
AT3G55120	-1.191
AT3G55970	4.565
AT5G39610	2.128
AT1G56500	-0.773
AT3G62030	-0.944
AT5G16710	-0.935
AT2G46910	-0.754
AT4G32070	0.766
AT3G51000	0.842
AT2G30140	0.894
AT2G38530	-1.638
AT1G32440	-0.999
AT5G21020	0.743
AT3G18890	-1.200
AT4G38550	-0.696
AT4G12900	-0.592
AT2G36950	0.703
AT3G55250	-0.716
AT2G38870	1.848
AT1G66140	-0.747
AT5G43860	0.522
AT4G15530	0.722
AT4G09560	0.769
AT4G34760	-1.108
AT1G06000	0.829
AT5G04040	0.626
AT3G11500	-0.415
AT2G38780	-0.724
AT1G15100	0.587
AT3G25070	-0.736
AT2G39030	4.891
AT5G65010	-1.118
AT3G10520	-1.636
AT2G41880	-0.466
AT1G78600	0.620
AT2G46270	0.768
AT1G04530	-0.858
AT4G20360	-0.629
AT1G19800	-0.448
AT3G08010	-0.437
AT1G53320	0.655
AT2G17290	0.663
AT1G58180	0.630
AT1G67480	-0.483
AT4G39880	-0.475
AT3G26910	0.309
AT1G03020	-0.796
AT4G24770	-0.882
AT5G61530	0.569
AT3G63110	-0.593
AT2G16890	-0.563
AT1G53230	0.621
AT1G22885	-0.605
AT5G46871	0.666
AT3G15190	-1.175
AT3G06145	-1.669
AT5G20060	-0.528
AT1G52040	4.185
AT2G20180	-0.644
AT1G01140	0.952
AT4G16110	0.868
AT2G30790	-1.135
AT5G39520	3.454
AT2G38710	0.506
AT5G11270	-0.675
AT1G17020	3.814
AT3G49470	-0.826
AT1G65270	0.454
AT1G78290	0.640
AT3G02900	-0.443
AT4G23100	0.413
AT2G41680	-0.571
AT1G66230	-0.957
AT2G44160	-0.557
AT5G36880	0.498
AT1G18470	0.482
AT5G46220	-0.745
AT4G32570	-1.486
AT4G13840	-1.115
AT5G28750	-0.557
AT2G41040	-0.440
AT3G61890	1.526
AT3G25717	-0.785
AT2G04030	-0.588
AT3G45680	-0.637
AT2G34690	0.529
AT3G49490	0.560
AT2G43020	1.477
AT1G22740	-0.573
AT5G63970	0.903
AT4G28080	-0.702
AT2G44920	-0.579
AT1G34220	0.410
AT1G74970	-1.035
AT1G11870	-0.773
AT2G42790	2.060
AT1G30690	-0.660
AT5G48220	-0.608
AT2G01270	0.697
AT1G74890	-2.155
AT1G55370	-0.815
AT1G67195	0.447
AT5G42080	0.382
AT2G24200	0.962
AT1G04250	-0.571
AT2G43920	-0.949
AT3G47070	-0.847
AT2G28400	0.891
AT1G65890	2.677
AT1G32460	0.867
AT1G70985	-1.605
AT1G02450	-0.736
AT4G05590	0.445
AT5G15160	-1.308
AT1G29070	-1.064
AT1G31550	1.357
AT5G55120	0.758
AT1G58440	-0.734
AT1G73260	4.641
AT4G34135	0.875
AT2G20950	-0.709
AT2G40110	0.694
AT3G18830	0.545
AT4G21620	-0.807
AT2G05710	0.583
AT5G62140	-0.822
AT2G05840	0.561
AT4G24750	-0.643
AT5G43780	0.916
AT1G71695	-0.871
AT4G14540	-0.949
AT2G28860	0.890
AT3G48180	1.687
AT2G46900	0.676
AT3G44260	-0.696
AT3G61930	3.249
AT1G09795	-0.604
AT1G22180	0.847
AT3G09390	1.090
AT1G42970	-0.735
AT2G19450	2.033
AT1G33960	0.845
AT5G57930	-0.581
AT3G26070	-0.622
AT4G23740	-1.368
AT2G37620	0.685
AT2G09865	-1.447
AT2G25100	-0.590
AT2G33800	-0.770
AT5G08050	-1.099
AT2G35130	-1.052
AT5G23630	0.444
AT4G16146	1.814
AT1G70210	-0.828
AT2G41410	0.490
AT4G22756	-0.552
AT1G16920	-0.730
AT2G37180	0.469
AT1G04220	-1.534
AT4G39800	-0.716
AT2G05630	0.922
AT1G43245	0.798
AT1G22690	-0.669
AT5G57815	0.680
AT5G41670	-0.471
AT4G00165	-0.938
AT3G12150	-0.696
AT4G02230	0.456
AT4G14710	0.869
AT2G37130	2.865
AT1G21410	1.168
AT2G31560	0.767
AT5G17190	0.753
AT5G51460	-0.747
AT2G25910	0.654
AT2G38860	0.463
AT4G30270	1.467
AT5G06710	-0.861
AT3G13310	0.467
AT1G76110	-0.580
AT3G21870	-0.930
AT2G20270	-0.572
AT5G53460	0.480
AT2G05310	-0.494
AT4G27540	0.565
AT1G52855	0.571
AT3G26060	-1.439
AT5G55220	-0.827
AT4G08870	3.107
AT2G30942	0.651
AT1G72790	0.738
AT4G34600	-0.787
AT2G26580	-0.742
AT3G60620	-0.404
AT3G55980	-1.026
AT3G51450	2.327
AT5G13180	0.651
AT4G10480	-0.622
AT1G26560	-1.201
AT4G28300	0.723
AT5G18100	-0.442
AT3G24420	-1.623
AT4G04910	0.574
AT2G04039	-0.673
AT4G14560	-0.943
AT3G53180	0.576
AT3G60630	-0.506
AT3G54640	1.036
AT1G15260	-1.148
AT5G51710	0.490
AT2G34420	0.574
AT1G26770	1.606
AT1G76390	0.892
AT2G29690	-0.672
AT1G02850	1.699
AT5G03880	-0.716
AT1G01780	0.636
AT3G15850	-1.317
AT2G46330	-0.675
AT4G27130	1.179
AT4G26080	0.993
AT1G67730	-0.875
AT5G08640	-1.894
AT2G30770	1.128
AT3G61870	-0.773
AT1G49380	-0.797
AT4G33960	-0.653
AT2G15020	-0.449
AT3G17020	0.582
AT5G12950	-0.931
AT5G41700	-0.657
AT2G20340	0.863
AT3G12920	0.530
AT3G22600	0.874
AT4G21790	0.826
AT1G19550	2.513
AT4G04890	-0.782
AT3G60440	-0.624
AT5G39090	1.081
AT4G36210	0.468
AT5G24160	1.441
AT1G62510	-1.782
AT1G72645	-0.670
AT2G28000	-0.632
AT1G15750	0.552
AT5G62680	0.722
AT2G35370	-0.631
AT4G02520	0.615
AT1G50900	-0.854
AT1G54500	-0.727
AT1G34000	-0.638
AT1G03550	0.632
AT5G50660	0.816
AT5G62150	1.827
AT1G34640	-0.987
AT2G47470	0.446
AT3G12760	0.543
AT5G01590	-0.611
AT1G21550	1.913
AT5G18410	-0.454
AT1G07040	1.637
AT5G42050	0.877
AT1G54010	-0.200
AT5G30495	0.604
AT4G35770	1.436
AT3G23920	1.248
AT2G47380	0.400
AT4G12470	1.457
AT1G23780	0.466
AT4G18480	-0.510
AT2G35410	-0.846
AT4G02430	0.538
AT3G52340	-0.454
AT5G18020	-1.619
AT5G02840	0.466
AT1G70690	0.657
AT5G42250	-0.653
AT3G22440	0.571
AT3G16460	2.439
AT4G21990	-0.546
AT5G46960	1.423
AT4G09030	0.766
AT1G31130	0.619
AT2G03090	-1.115
AT5G53120	0.761
AT4G19530	-1.319
AT3G05970	0.548
AT3G61080	-1.227
AT3G48640	-1.416
AT1G17200	-0.683
AT4G12390	-0.817
AT1G27130	-0.805
AT1G15010	1.143
AT3G45930	-0.685
AT2G29420	0.586
AT1G30250	-1.051
AT1G51920	-0.766
AT1G74040	-0.628
AT1G12220	-0.400
AT4G05180	-0.450
AT1G24575	1.599
AT2G39780	0.505
AT5G01800	0.654
AT5G58350	1.140
AT5G01090	-0.668
AT3G26100	0.896
AT1G48140	0.499
AT1G31480	0.551
AT4G38470	0.685
AT4G01895	1.502
AT2G43680	0.899
AT5G09995	-0.540
AT4G30460	0.721
AT2G45220	2.490
AT3G06350	0.441
AT3G54210	-0.966
AT1G62250	-0.767
AT4G25970	0.436
AT1G05890	0.659
AT2G18910	-0.520
AT3G17240	0.666
AT4G11480	-0.840
AT3G19680	-0.780
AT3G19480	-0.680
AT4G28740	-0.410
AT5G49710	0.613
AT5G28770	-0.659
AT5G24530	0.894
AT5G23440	-0.535
AT3G02230	0.531
AT4G09750	0.775
AT1G15730	-0.586
AT1G08233	0.914
AT1G24880	0.513
AT1G21350	-0.827
AT2G47560	0.556
AT3G24570	-0.462
AT1G64360	1.954
AT5G24850	-0.528
AT4G25830	-1.060
AT4G02360	2.915
AT1G02500	0.487
AT3G21700	1.293
AT4G36540	-0.877
AT1G64770	-0.991
AT5G10690	-0.621
AT5G23750	-0.757
AT2G41430	-0.518
AT5G02600	2.527
AT5G53820	1.371
AT1G14330	1.201
AT2G24020	-0.867
AT4G22260	0.513
AT1G01600	-0.910
AT1G72770	0.640
AT4G36640	1.144
AT3G03840	-1.359
AT2G22780	0.586
AT1G51110	-1.083
AT5G12860	-0.924
AT5G24105	-1.077
AT2G35800	-0.482
AT1G61120	2.874
AT5G13190	0.604
AT1G78380	0.848
AT3G22150	-0.623
AT1G18720	0.513
AT1G76800	-1.071
AT4G14950	1.172
AT1G08650	0.562
AT2G26930	-0.619
AT3G15540	-0.594
AT3G09820	-0.551
AT2G26750	1.328
AT2G25605	-0.645
AT5G21930	-0.720
AT4G01850	1.134
AT5G58570	1.156
AT1G12900	-1.328
AT3G23805	-0.772
AT2G37570	0.640
AT4G18890	0.521
AT1G32350	2.290
AT1G36380	0.677
AT1G22910	0.550
AT5G47490	-0.913
AT4G31590	-0.568
AT5G54070	-0.888
AT3G22370	0.797
AT1G59860	-0.924
AT2G47180	2.880
AT3G07700	0.784
AT1G43160	4.285
AT1G65230	-1.056
AT2G17420	0.619
AT1G09250	0.734
AT3G02875	2.081
AT5G07020	-1.081
AT1G56120	-0.766
AT2G14560	0.482
AT1G41830	-1.014
AT1G26945	-0.815
AT1G01080	-0.778
AT4G34530	-0.611
AT5G16360	2.652
AT3G23280	0.651
AT2G31570	0.723
AT2G05260	0.769
AT3G50560	-1.024
AT2G02570	0.791
AT5G52970	-0.953
AT2G05230	0.435
AT5G53170	-0.504
AT3G28290	4.145
AT1G54740	-1.002
AT3G21190	-0.747
AT2G40490	-0.539
AT1G64750	0.537
AT4G18197	-1.567
AT4G35090	-0.196
AT3G50500	0.696
AT3G13380	0.608
AT2G37660	-0.731
AT1G05850	-0.577
AT4G17480	2.390
AT1G72160	0.457
AT5G44520	-0.499
AT5G56750	1.532
AT2G28470	-0.832
AT4G29380	0.751
AT1G77540	0.504
AT1G73010	3.443
AT5G15240	1.048
AT3G61470	-0.651
AT1G78140	-0.440
AT3G61280	0.684
AT1G33320	-0.645
AT1G77370	0.885
AT1G67700	-0.821
AT2G36250	-0.662
AT2G35760	-1.318
AT5G06060	-0.573
AT5G24430	0.707
AT4G27440	-1.249
AT5G05410	2.172
AT3G29034	0.662
AT4G17470	5.212
AT5G14780	1.199
AT5G11450	-0.771
AT3G15110	-0.545
AT3G57070	-0.563
AT3G25780	1.500
AT5G14740	-0.679
AT2G04790	-0.863
AT3G14050	1.297
AT1G52565	1.116
AT3G14990	1.174
AT1G33811	-0.680
AT4G26540	-1.018
AT5G10300	2.311
AT2G31945	3.596
AT1G09200	-0.625
AT1G03220	2.074
AT1G48750	-0.664
AT2G15970	-0.528
AT4G37900	0.826
AT1G53570	0.530
AT5G57900	0.686
AT2G05510	3.456
AT3G50530	-0.633
AT5G39830	-0.661
AT2G33830	0.502
AT1G52760	0.607
AT1G56410	-0.684
AT1G26630	0.493
AT1G73480	1.542
AT2G36080	2.979
AT4G15690	-0.682
AT1G76680	-1.142
AT3G51750	-0.784
AT4G36390	-0.729
AT1G16510	0.986
AT1G10040	0.853
AT1G28050	0.847
AT3G13790	0.723
AT5G65380	1.070
AT2G27420	-1.674
AT2G23310	0.499
AT5G59050	-0.983
AT2G15830	0.472
AT1G61610	1.273
AT2G23120	0.628
AT1G66820	-0.503
AT1G68410	0.577
AT1G74370	-0.706
AT3G59050	0.721
AT5G08720	-0.859
AT5G23120	-1.074
AT5G58290	0.664
AT3G27620	1.996
AT3G15500	3.037
AT3G21260	-0.876
AT3G16370	-1.120
AT1G30910	-0.672
AT5G56350	0.678
AT5G45410	0.580
AT4G24010	0.937
AT2G01540	0.832
AT1G66970	-0.572
AT5G54470	0.692
AT1G52000	2.120
AT3G50685	-0.645
AT1G76070	0.560
AT3G17330	-0.660
AT2G05990	-0.822
AT4G29590	-0.783
AT5G62180	-0.672
AT2G17300	-1.413
AT2G15080	0.441
AT1G58235	0.493
AT5G06220	-0.811
AT2G41560	-1.022
AT5G53110	-0.411
AT1G22930	0.853
AT4G37925	-0.737
AT4G35950	-0.688
AT2G37790	-0.823
AT4G24690	0.890
AT1G12090	-1.988
AT4G25030	0.982
AT2G34560	-0.614
AT3G50790	-0.603
AT1G14270	-0.602
AT3G01540	1.039
AT5G63410	-0.577
AT5G37540	0.992
AT1G15350	0.816
AT5G66052	1.040
AT1G71500	-1.114
AT3G49670	-1.065
AT1G30520	-1.254
AT2G01480	0.387
AT3G20270	0.490
AT1G76955	0.668
AT5G40760	0.657
AT2G20670	-1.284
AT1G24807	0.661
AT3G18750	-0.785
AT4G05150	0.439
AT5G01900	1.076
AT2G02500	-1.041
AT5G54430	0.581
AT5G09600	0.537
AT5G37360	-1.085
AT4G17770	-0.687
AT1G65260	-0.664
AT5G20620	0.655
AT5G06870	2.420
AT2G33855	-0.934
AT5G25460	-0.957
AT4G24780	-0.851
AT4G01950	-0.832
AT4G34090	-0.849
AT2G30860	0.577
AT5G11420	-0.718
AT1G64510	-0.684
AT1G29440	-1.249
AT5G63570	-0.811
AT5G38710	2.206
AT3G26740	0.539
AT4G27700	-0.672
AT1G27030	-0.762
AT5G55960	-0.755
AT2G01420	-0.664
AT3G62930	-0.744
AT1G24793	0.624
AT1G10840	-0.521
AT4G13510	-0.467
AT3G45160	-1.426
AT3G22550	0.613
AT3G16500	0.989
AT1G26420	0.680
AT1G15550	-2.258
AT2G20725	-0.570
AT1G60610	1.194
AT1G15030	-0.634
AT2G37220	-0.606
AT5G22860	2.059
AT1G36980	0.646
AT2G29170	1.144
AT1G64640	-0.951
AT5G36170	-0.603
AT1G31340	-0.533
AT4G11650	4.977
AT5G54770	-0.741
AT1G32060	-0.425
AT1G13820	-0.489
AT5G47060	0.681
AT3G06150	-0.549
AT1G78660	1.135
AT2G39700	-1.022
AT1G55480	-1.008
AT2G37240	-0.612
AT2G32180	-0.526
AT5G47330	-1.435
AT1G33260	1.153
AT5G44390	0.792
AT3G02150	0.721
AT5G53370	0.451
AT4G09350	-0.928
AT1G49975	-0.942
AT4G27450	0.652
AT3G30775	1.871
AT2G31890	-0.448
AT5G62430	-0.574
AT1G19770	-1.253
AT5G16450	0.775
AT3G43720	-0.774
AT3G47420	1.270
AT2G05790	-0.995
AT1G17290	0.588
AT2G22640	-0.411
AT1G53870	-0.407
AT3G25660	-0.545
AT2G24090	-0.867
AT2G38940	2.660
AT1G53780	0.647
AT1G67950	-0.744
AT1G54080	0.434
AT1G62790	0.711
AT2G26695	-0.700
AT4G22753	0.691
AT2G41710	0.518
AT1G79520	0.579
AT2G18890	-1.264
AT1G20010	-0.644
AT4G01310	-1.109
AT3G04120	0.579
AT5G59820	1.170
AT5G63060	-0.763
AT4G22470	1.009
AT5G05110	1.116
AT1G60890	0.757
AT2G01890	1.879
AT1G79410	-0.518
AT2G24790	-0.441
AT3G13470	-1.225
AT5G67370	-0.639
AT1G50250	-0.531
AT3G12210	-0.437
AT4G16500	0.435
AT1G31120	1.222
AT5G49450	1.712
AT4G33150	3.756
AT2G24980	0.639
AT3G10020	-0.504
AT4G02850	-1.181
AT1G72910	-0.639
AT1G78570	-0.498
AT1G15980	-1.137
AT5G25190	-0.489
AT2G30360	1.360
AT2G34860	-0.690
AT3G63490	-0.696
AT5G13750	1.452
AT3G59930	6.182
AT3G02510	1.007
AT5G04490	-0.616
AT5G58670	0.587
AT2G18170	0.937
AT2G30750	1.828
AT3G45850	-0.579
AT1G45230	-0.467
AT5G22545	0.953
AT3G26570	-0.544
AT1G26440	0.728
AT1G16720	-0.793
AT5G03455	0.503
AT1G35190	0.540
AT4G15765	1.865
AT3G60640	0.784
AT3G53500	0.728
AT1G52827	-1.353
AT2G43820	1.125
AT5G17230	-0.578
AT1G75400	0.639
AT2G43710	-0.497
AT1G06400	0.465
AT2G45190	-0.987
AT2G20740	0.540
AT4G02050	0.666
AT5G49730	-1.035
AT1G55140	-0.603
AT2G21960	-0.851
AT5G65020	1.179
AT4G36990	0.874
AT3G07480	0.524
AT3G10770	0.540
AT3G45060	2.796
AT1G19180	2.394
AT5G54310	0.501
AT2G42360	0.988
AT3G53900	-1.407
AT2G03730	-0.464
AT1G80030	-0.509
AT4G38950	-1.405
AT1G07500	1.776
AT5G16340	0.985
AT1G75680	-0.819
AT3G63200	-1.304
AT4G23890	-0.548
AT5G35100	-0.414
AT1G17190	0.563
AT5G41400	1.372
AT2G36870	-1.546
AT2G39850	-0.647
AT4G22150	0.716
AT4G27500	0.652
AT2G25625	2.022
AT3G53610	0.457
AT5G02830	-0.540
AT1G05620	1.105
AT5G51545	-0.954
AT5G07460	0.503
AT5G42300	0.789
AT5G53300	0.688
AT3G28210	1.092
AT1G35170	-1.476
AT3G23430	-0.764
AT4G30950	-0.810
AT1G21120	-1.516
AT2G34810	1.835
AT4G01330	-0.584
AT1G70310	-0.521
AT2G02390	1.215
AT1G79510	-0.614
AT5G52520	-0.486
AT3G43600	-0.509
AT5G20230	1.368
AT5G61640	0.987
AT2G31680	0.413
AT3G29250	1.608
AT5G14700	0.726
AT2G28190	-0.879
AT4G03320	2.620
AT4G01883	-0.779
AT4G04630	-0.874
AT2G15960	1.328
AT1G74010	3.493
AT4G17460	-0.986
AT2G44490	-0.675
AT1G66150	-0.922
AT2G36430	-0.772
AT1G07170	0.681
AT1G32100	-0.931
AT2G23320	0.649
AT1G11790	-0.597
AT1G25440	-0.452
AT5G05270	-1.630
AT2G37970	0.830
AT1G67070	1.213
AT3G06420	2.153
AT1G22340	0.978
AT4G10960	1.116
AT5G48360	-0.630
AT1G18060	-1.123
AT1G59740	0.736
AT1G66940	-0.688
AT2G23670	-0.667
AT1G21720	0.418
AT3G21510	0.676
AT1G42550	-0.434
AT4G24730	0.666
AT4G08980	0.424
AT4G02280	1.351
AT5G64680	-1.143
AT5G60200	-0.570
AT1G07400	-0.981
AT4G14870	-0.785
AT5G20520	0.827
AT5G13650	-0.582
AT3G02040	1.695
AT5G27350	0.748
AT1G47970	-0.518
AT1G16540	0.606
AT1G74920	0.633
AT5G63780	-0.797
AT3G10320	2.936
AT1G10155	-0.638
AT2G41945	0.517
AT3G47510	-0.815
AT2G06050	1.581
AT3G05640	0.848
AT5G53330	0.577
AT4G34990	0.760
AT5G19620	-0.526
AT4G00400	-1.125
AT5G36160	-0.387
AT4G17300	-0.646
AT3G14415	-0.640
AT1G49350	1.003
AT4G37120	0.598
AT4G38970	-0.610
AT5G07000	5.037
AT1G52400	2.422
AT1G66570	1.339
AT3G17640	-2.691
AT5G22580	-1.559
AT5G17670	-0.840
AT1G23740	-0.864
AT4G10955	0.867
AT5G59870	-1.127
AT5G20150	1.680
AT5G64310	1.025
AT3G62650	0.424
AT3G55360	-1.217
AT4G25300	0.862
AT5G47180	0.765
AT2G36220	1.011
AT2G29720	0.434
AT5G56630	0.734
AT1G05680	2.377
AT3G19370	-0.517
AT1G72240	-0.760
AT4G21470	0.552
AT5G01790	-0.790
AT5G11810	0.627
AT4G01900	-0.758
AT2G46680	1.431
AT2G26800	0.591
AT2G16710	0.891
AT3G49780	0.692
AT1G30210	-0.375
AT1G10140	2.022
AT1G27980	1.057
AT4G00040	0.600
AT1G03130	-0.666
AT2G28510	1.137
AT4G14740	-0.796
AT3G51730	0.472
AT1G55510	1.121
AT1G78630	-0.756
AT3G17940	0.496
AT3G23410	0.526
AT5G59350	-1.246
AT3G55800	-0.768
AT1G64355	-0.753
AT5G06860	1.344
AT5G56980	1.170
AT5G10860	0.494
AT4G12050	-2.128
AT1G54020	3.094
AT5G64460	-1.381
AT3G16520	-0.903
AT5G06640	0.562
AT4G30190	0.558
AT3G46100	-0.626
AT5G61340	-1.086
AT2G39310	4.189
AT1G15380	4.574
AT1G16170	-0.513
AT3G25110	0.502
AT5G62190	0.415
AT1G05000	1.337
AT5G20900	1.109
AT1G53910	0.649
AT5G53900	-0.870
AT1G63940	-0.589
AT5G13220	3.768
AT3G54900	-0.437
AT4G20780	-0.584
AT1G45145	1.554
AT3G10640	0.619
AT4G12690	-0.610
AT5G58575	0.750
AT1G71080	0.572
AT3G58680	0.635
AT3G54950	0.570
AT1G01630	-0.653
AT2G43350	0.652
AT5G05820	-0.492
AT1G74410	0.626
AT3G46780	-1.135
AT3G22850	0.867
AT2G21390	0.610
AT1G58290	-0.904
AT3G61150	-0.660
AT4G24220	0.937
AT3G03990	0.598
AT4G25000	1.866
AT5G47560	0.681
AT5G54290	-0.496
AT2G28605	-1.032
AT1G01610	-0.976
AT1G76450	-0.592
AT5G66170	0.715
AT1G50640	0.460
AT4G23820	-0.640
AT5G48900	-0.955
AT2G39330	3.598
AT5G61670	-0.468
AT2G34600	2.025
AT3G44860	0.951
AT3G62290	0.742
AT2G30840	2.818
AT5G07920	0.577
AT5G66760	1.198
AT1G65720	0.487
AT1G05010	0.930
AT5G24610	0.543
AT2G29700	0.393
AT3G51895	0.601
AT3G14280	1.294
AT5G57170	-0.832
AT4G12420	-0.845
AT5G21920	-0.796
AT3G02720	-0.515
AT3G51860	1.991
AT2G47370	-0.539
AT4G33760	-0.692
AT2G22330	0.852
AT4G03280	-0.642
AT1G20850	-0.579
AT2G26900	-0.416
AT2G16900	0.595
AT1G21590	-0.453
AT5G18660	-1.128
AT4G33010	-0.457
AT2G03310	-0.603
AT1G21310	1.133
AT4G37180	0.733
AT4G18440	3.018
AT3G62010	1.161
AT3G26320	-0.421
AT5G11930	0.774
AT3G50360	0.584
AT1G63610	-0.610
AT4G15440	2.820
AT4G13250	1.785
AT2G02870	1.192
AT1G43910	0.933
AT4G36760	1.180
AT3G29185	-0.541
AT5G21430	-1.704
AT1G70760	-1.282
AT4G16260	3.552
AT2G43560	-1.194
AT2G22795	-0.585
AT2G29070	0.614
AT1G10700	0.493
AT3G44020	-0.507
AT3G29280	-0.824
AT4G10860	1.165
AT1G68840	-1.226
AT4G19710	-0.932
AT1G73530	-0.783
AT2G43570	1.439
AT1G26380	0.862
AT2G41940	0.634
AT1G18570	-0.967
AT5G17000	0.401
AT2G38240	-0.632
AT3G24190	-0.705
AT4G17560	-1.143
AT2G44050	-0.721
AT1G29760	0.569
AT1G69523	-2.065
AT1G22430	-0.673
AT3G26180	0.954
AT1G26390	3.341
AT3G05880	0.700
AT1G56140	0.665
AT2G04160	1.688
AT1G01730	0.782
AT1G64710	-0.609
AT5G37640	1.128
AT4G16190	0.914
AT5G48160	0.496
AT5G18060	-1.694
AT5G16970	1.189
AT4G33540	1.904
AT1G75960	0.892
AT3G05090	0.556
AT5G55480	-0.695
AT4G33740	-0.499
AT5G59430	-0.792
AT5G23010	0.570
AT2G33310	-0.590
AT3G16785	0.515
AT2G37460	-1.195
AT3G19970	1.814
AT3G20670	-0.485
AT3G10190	0.731
AT1G28480	1.608
AT5G13140	-1.300
AT4G20870	-0.780
AT1G76960	0.723
AT5G16370	1.220
AT5G39730	0.814
AT2G38400	2.425
AT1G19670	2.421
AT4G02075	-0.703
AT3G44990	-3.457
AT4G27230	-0.979
AT1G06190	-0.593
AT5G14790	-0.641
AT2G22470	2.180
AT1G24600	1.772
AT1G22840	0.611
AT3G60140	4.713
AT2G29360	1.066
AT1G65870	-0.754
AT5G43570	3.584
AT2G28740	-0.910
AT4G04020	-0.902
AT5G04360	-0.725
AT2G30600	0.845
AT4G18020	0.443
AT3G43160	0.882
AT4G03410	0.632
AT1G28330	0.681
AT3G61060	-0.492
AT3G11630	-1.076
AT3G51600	-1.353
AT5G01920	-1.021
AT3G47340	4.070
AT2G03760	0.631
AT4G13720	-0.569
AT3G57880	0.621
AT4G25500	0.747
AT5G19860	0.558
AT3G29030	-1.237
AT5G60400	-0.889
AT2G43530	2.882
AT5G66530	-1.153
AT5G12210	0.605
AT4G12480	0.923
AT4G12800	-0.626
AT1G63550	-1.024
AT1G07110	-0.516
AT4G15790	-0.667
AT1G68620	3.056
AT4G03400	0.780
AT2G01110	-0.407
AT3G30390	0.728
AT2G30575	-0.535
AT3G62550	-0.705
AT1G23120	2.315
AT4G00355	0.528
AT2G02950	-0.793
AT1G06650	0.569
AT1G06240	-0.372
AT1G51090	0.747
AT1G77920	0.681
AT3G22290	0.625
AT4G34240	-0.416
AT1G51100	-0.876
AT3G18773	-0.969
AT5G25610	-1.400
AT1G33480	-1.143
AT4G33500	-0.662
AT3G17790	1.640
AT1G26660	0.546
AT1G77120	1.369
AT4G33470	-0.522
AT1G13060	0.442
AT5G26340	1.423
AT1G71520	2.008
AT2G39660	1.489
AT1G54210	0.494
AT5G08410	-0.649
AT2G39420	2.822
AT1G03630	-0.833
AT1G07610	1.042
AT1G15190	0.575
AT3G23510	-0.794
AT5G13080	2.442
AT3G62530	-0.508
AT1G31860	-0.805
AT5G23380	0.641
AT3G12600	0.583
AT4G08780	2.267
AT2G35940	0.950
AT1G20225	0.450
AT1G47300	2.659
AT1G50260	0.633
AT5G42070	-0.942
AT1G72450	1.148
AT5G56600	-0.485
AT5G59420	0.703
AT2G42530	-1.191
AT1G51870	0.558
AT5G07580	-1.231
AT3G12570	0.480
AT2G27050	-0.512
AT5G37770	-0.609
AT3G03480	3.727
AT5G54140	0.550
AT5G28500	-0.680
AT3G08740	-0.611
AT3G05625	-0.574
AT2G21140	-0.838
AT1G75350	-0.804
AT1G67330	-0.619
AT5G60360	0.549
AT5G47840	-0.700
AT1G50510	0.490
AT5G61780	0.631
AT4G24930	-1.021
AT2G40400	-0.615
AT4G19640	0.674
AT2G47485	-0.718
AT3G10160	-0.593
AT1G65510	1.240
AT1G71720	-0.537
AT3G16240	-0.935
AT4G17740	-0.648
AT3G63160	-1.587
AT5G11880	-0.559
AT1G10070	2.937
AT3G04720	2.199
AT5G48880	0.653
AT5G67280	-0.739
AT1G64660	1.045
AT4G08770	2.713
AT1G12080	-0.846
AT5G58375	0.877
AT3G02380	-0.894
AT1G48350	-0.822
AT5G03340	0.573
AT4G37040	-0.517
AT1G52720	1.476
AT3G54880	0.837
AT2G21190	0.555
AT1G32700	0.534
AT1G23870	1.050
AT4G35060	1.557
AT2G28710	1.003
AT4G35790	0.781
AT4G26555	-0.855
AT4G15610	3.743
AT3G10815	1.212
AT4G39330	-1.818
AT5G07470	0.754
AT4G18280	-0.862
AT3G28080	-0.738
AT3G63190	-0.728
AT3G45140	2.513
AT4G28060	0.739
AT2G14880	-0.634
AT4G16765	0.726
AT2G44410	0.557
AT5G49160	-0.737
AT3G27850	-0.731
AT1G48260	0.548
AT3G60300	1.302
AT1G01240	0.813
AT5G05090	-0.540
AT5G27290	-1.325
AT3G23810	-1.055
AT1G30700	4.360
AT3G27690	-1.325
AT4G27030	-1.001
AT1G63180	1.449
AT1G63360	-0.509
AT1G77280	0.585
AT4G15670	-0.645
AT4G05530	0.587
AT1G55210	0.482
AT4G28250	-1.224
AT1G18170	-1.011
AT5G24200	1.491
AT5G62740	0.736
AT5G52240	0.575
AT1G55260	-1.545
AT5G43380	1.520
AT4G38090	0.439
AT1G56650	3.300
AT3G14060	2.847
AT5G20140	-0.652
AT1G78670	0.684
AT1G26930	2.140
AT4G25670	0.431
AT3G12930	-0.982
AT5G35690	0.742
AT5G54940	0.453
AT1G11750	-0.492
AT3G58170	0.398
AT4G38630	0.628
[truncated: 1,201 more rows]
