# Supplementary material for: Molecular Signatures in Arabidopsis thaliana in Response to Insect Attack and Bacterial Infection
Source: PLoS One. 2013 Mar 25;8(3):e58987. doi: 10.1371/journal.pone.0058987 (PMC3607608; doi:10.1371/journal.pone.0058987)
Supplement: File S6 — Lists of aphid-specific and P. syringae-specific genes and their log2-transformed expression values related to biotic stress signalling processes. (XLS) [file pone.0058987.s006.xls]

## Sheet: aphid specific
*Signalling genes showing Aphid specific expressions. Positively regulated log2 values are marked with light red colour
BinCode	BinName	id	aphidspecifilog2.txt	description
30.1.1	signalling.in sugar and nutrient physiology	at3g04110	0.479	Symbols: GLR1, ATGLR1.1, GLR1.1 | GLR1.1 (GLUTAMATE RECEPTOR 1.1); cation channel/ intracellular ligand-gated ion channel | chr3:1077328-1080405 FORWARD
30.1.1	signalling.in sugar and nutrient physiology	at3g51480	-0.614	Symbols: ATGLR3.6, GLR3.6 | ATGLR3.6 (GLUTAMATE RECEPTOR 3.6); intracellular ligand-gated ion channel | chr3:19100676-19104825 FORWARD
30.1.1	signalling.in sugar and nutrient physiology	at3g29160	-0.487	Symbols: AKIN11, SnRK1.2, KIN11 | AKIN11 (Arabidopsis SNF1 kinase homolog 11); protein binding / protein kinase | chr3:11128625-11132065 REVERSE
30.1.1	signalling.in sugar and nutrient physiology	at4g08950	0.721	Symbols: EXO | EXO (EXORDIUM) | chr4:5740297-5741524 FORWARD
30.1.1	signalling.in sugar and nutrient physiology	at2g29120	1.667	Symbols: ATGLR2.7, GLR2.7 | ATGLR2.7; intracellular ligand-gated ion channel | chr2:12511292-12515895 REVERSE
30.2.1	signalling.receptor kinases.leucine rich repeat I	at2g19190	3.358	Symbols: FRK1 | FRK1 (FLG22-INDUCED RECEPTOR-LIKE KINASE 1); kinase | chr2:8326049-8329944 REVERSE
30.2.1	signalling.receptor kinases.leucine rich repeat I	at2g37050	-0.409	kinase | chr2:15568986-15573726 FORWARD
30.2.1	signalling.receptor kinases.leucine rich repeat I	at5g15730	0.929	serine/threonine protein kinase, putative | chr5:5130503-5133187 FORWARD
30.2.1	signalling.receptor kinases.leucine rich repeat I	at1g51620	0.483	protein kinase family protein | chr1:19140130-19141787 FORWARD
30.2.2	signalling.receptor kinases.leucine rich repeat II	at2g13800	1.025	Symbols: ATSERK5, SERK5 | SERK5 (SOMATIC EMBRYOGENESIS RECEPTOR-LIKE KINASE 5); ATP binding / protein kinase/ transmembrane receptor protein serine/threonine kinase | chr2:5753271-5757239 FORWARD
30.2.2	signalling.receptor kinases.leucine rich repeat II	at5g16000	-0.682	Symbols: NIK1 | NIK1 (NSP-INTERACTING KINASE 1); kinase | chr5:5224143-5227288 FORWARD
30.2.3	signalling.receptor kinases.leucine rich repeat III	at4g20940	-0.352	leucine-rich repeat family protein | chr4:11202728-11206280 FORWARD
30.2.3	signalling.receptor kinases.leucine rich repeat III	at2g36570	-0.65	leucine-rich repeat transmembrane protein kinase, putative | chr2:15335496-15337927 FORWARD
30.2.3	signalling.receptor kinases.leucine rich repeat III	at3g08680	-0.738	leucine-rich repeat transmembrane protein kinase, putative | chr3:2637592-2640838 FORWARD
30.2.3	signalling.receptor kinases.leucine rich repeat III	at1g68400	-0.539	leucine-rich repeat transmembrane protein kinase, putative | chr1:25646039-25648946 REVERSE
30.2.3	signalling.receptor kinases.leucine rich repeat III	at5g10020	-0.488	leucine-rich repeat transmembrane protein kinase, putative | chr5:3133261-3137242 FORWARD
30.2.3	signalling.receptor kinases.leucine rich repeat III	at5g16590	-0.367	Symbols: LRR1 | LRR1; ATP binding / kinase/ protein serine/threonine kinase | chr5:5431681-5434134 FORWARD
30.2.6	signalling.receptor kinases.leucine rich repeat VI	at5g41180	0.594	leucine-rich repeat protein kinase, putative | chr5:16483871-16487426 FORWARD
30.2.7	signalling.receptor kinases.leucine rich repeat VII	at5g45800	0.498	Symbols: MEE62 | MEE62 (maternal effect embryo arrest 62); ATP binding / protein binding / protein kinase/ protein serine/threonine kinase/ protein tyrosine kinase | chr5:18575536-18579107 REVERSE
30.2.7	signalling.receptor kinases.leucine rich repeat VII	at3g56370	-0.719	leucine-rich repeat transmembrane protein kinase, putative | chr3:20899099-20902981 REVERSE
30.2.8.1	signalling.receptor kinases.leucine rich repeat VIII-1	at5g01950	0.953	ATP binding / kinase/ protein serine/threonine kinase | chr5:364902-370186 REVERSE
30.2.8.1	signalling.receptor kinases.leucine rich repeat VIII-1	at1g06840	0.459	leucine-rich repeat transmembrane protein kinase, putative | chr1:2097747-2103479 REVERSE
30.2.8.1	signalling.receptor kinases.leucine rich repeat VIII-1	at5g49760	1.005	leucine-rich repeat family protein / protein kinase family protein | chr5:20216372-20221299 FORWARD
30.2.8.2	signalling.receptor kinases.leucine rich repeat VIII-2	at1g07650	-0.375	leucine-rich repeat transmembrane protein kinase, putative | chr1:2359549-2366561 REVERSE
30.2.8.2	signalling.receptor kinases.leucine rich repeat VIII-2	at1g53440	0.452	leucine-rich repeat family protein / protein kinase family protein | chr1:19945959-19951562 FORWARD
30.2.8.2	signalling.receptor kinases.leucine rich repeat VIII-2	at3g14840	0.533	leucine-rich repeat family protein / protein kinase family protein | chr3:4988107-4994058 FORWARD
30.2.8.2	signalling.receptor kinases.leucine rich repeat VIII-2	at1g16670	0.865	protein kinase family protein | chr1:5697324-5699769 FORWARD
30.2.8.2	signalling.receptor kinases.leucine rich repeat VIII-2	at1g53430	0.682	leucine-rich repeat family protein / protein kinase family protein | chr1:19935167-19941088 FORWARD
30.2.10	signalling.receptor kinases.leucine rich repeat X	at5g48380	1.09	leucine-rich repeat family protein / protein kinase family protein | chr5:19604089-19607059 REVERSE
30.2.10	signalling.receptor kinases.leucine rich repeat X	at1g72300	0.67	leucine-rich repeat transmembrane protein kinase, putative | chr1:27217477-27221123 REVERSE
30.2.10	signalling.receptor kinases.leucine rich repeat X	at3g28450	0.865	leucine-rich repeat transmembrane protein kinase, putative | chr3:10667262-10669377 FORWARD
30.2.10	signalling.receptor kinases.leucine rich repeat X	at2g41820	-0.783	leucine-rich repeat transmembrane protein kinase, putative | chr2:17446744-17450071 FORWARD
30.2.11	signalling.receptor kinases.leucine rich repeat XI	at2g31880	2.366	leucine-rich repeat transmembrane protein kinase, putative | chr2:13554894-13556977 FORWARD
30.2.11	signalling.receptor kinases.leucine rich repeat XI	at1g28440	-0.568	Symbols: HSL1 | HSL1 (HAESA-Like 1); ATP binding / kinase/ protein serine/threonine kinase | chr1:9996824-10000447 FORWARD
30.2.11	signalling.receptor kinases.leucine rich repeat XI	at5g25930	1.635	leucine-rich repeat family protein / protein kinase family protein | chr5:9050794-9054143 FORWARD
30.2.11	signalling.receptor kinases.leucine rich repeat XI	at1g09970	1.686	Symbols: LRR XI-23 | LRR XI-23; ATP binding / kinase/ protein kinase/ protein serine/threonine kinase | chr1:3252317-3255654 FORWARD
30.2.11	signalling.receptor kinases.leucine rich repeat XI	at2g33170	0.578	leucine-rich repeat transmembrane protein kinase, putative | chr2:14056250-14060641 REVERSE
30.2.11	signalling.receptor kinases.leucine rich repeat XI	at4g28490	1.798	Symbols: RLK5, HAE | HAE (HAESA); ATP binding / kinase/ protein kinase/ protein serine/threonine kinase | chr4:14077857-14081171 FORWARD
30.2.12	signalling.receptor kinases.leucine rich repeat XII	at5g20480	0.612	Symbols: EFR | EFR (EF-TU RECEPTOR); ATP binding / kinase/ protein serine/threonine kinase | chr5:6922480-6925887 FORWARD
30.2.12	signalling.receptor kinases.leucine rich repeat XII	at1g35710	1.892	leucine-rich repeat transmembrane protein kinase, putative | chr1:13220940-13224681 FORWARD
30.2.12	signalling.receptor kinases.leucine rich repeat XII	at4g08850	1.278	kinase | chr4:5636489-5640636 REVERSE
30.2.12	signalling.receptor kinases.leucine rich repeat XII	at3g47090	1.182	leucine-rich repeat transmembrane protein kinase, putative | chr3:17341512-17344645 REVERSE
30.2.12	signalling.receptor kinases.leucine rich repeat XII	at3g47570	1.072	leucine-rich repeat transmembrane protein kinase, putative | chr3:17527507-17530929 FORWARD
30.2.13	signalling.receptor kinases.leucine rich repeat XIII	at2g35620	-0.493	Symbols: FEI2 | FEI2 (FEI 2); kinase | chr2:14960940-14965359 REVERSE
30.2.14	signalling.receptor kinases.leucine rich repeat XIV	at4g39270	1.137	leucine-rich repeat transmembrane protein kinase, putative | chr4:18276505-18279848 FORWARD
30.2.16	signalling.receptor kinases.Catharanthus roseus-like RLK1	at2g39360	0.479	protein kinase family protein | chr2:16437472-16440154 REVERSE
30.2.16	signalling.receptor kinases.Catharanthus roseus-like RLK1	at5g59700	0.418	protein kinase, putative | chr5:24052385-24055425 REVERSE
30.2.16	signalling.receptor kinases.Catharanthus roseus-like RLK1	at5g39020	0.933	protein kinase family protein | chr5:15616917-15619358 FORWARD
30.2.16	signalling.receptor kinases.Catharanthus roseus-like RLK1	at2g23200	0.637	protein kinase family protein | chr2:9879276-9881908 FORWARD
30.2.17	signalling.receptor kinases.DUF 26	at4g23220	2.169	kinase | chr4:12153956-12157091 REVERSE
30.2.17	signalling.receptor kinases.DUF 26	at4g23290	-0.998	protein kinase family protein | chr4:12177738-12180826 REVERSE
30.2.17	signalling.receptor kinases.DUF 26	at1g70530	0.905	protein kinase family protein | chr1:26588750-26591379 REVERSE
30.2.17	signalling.receptor kinases.DUF 26	at4g21400	1.416	protein kinase family protein | chr4:11399131-11401709 REVERSE
30.2.17	signalling.receptor kinases.DUF 26	at4g23140	1.994	Symbols: CRK6 | CRK6 (CYSTEINE-RICH RLK 6); kinase | chr4:12121383-12124205 FORWARD
30.2.17	signalling.receptor kinases.DUF 26	at4g11530	0.743	kinase | chr4:6987093-6989599 FORWARD
30.2.17	signalling.receptor kinases.DUF 26	at4g23230	2.015	protein kinase family protein | chr4:12157569-12160270 REVERSE
30.2.17	signalling.receptor kinases.DUF 26	at4g11890	3.159	protein kinase family protein | chr4:7148246-7149921 FORWARD
30.2.17	signalling.receptor kinases.DUF 26	at4g04490	2.692	protein kinase family protein | chr4:2231957-2234638 REVERSE
30.2.17	signalling.receptor kinases.DUF 26	at4g23310	2.173	receptor-like protein kinase, putative | chr4:12185737-12188763 FORWARD
30.2.17	signalling.receptor kinases.DUF 26	at4g04500	3.484	protein kinase family protein | chr4:2238411-2240865 FORWARD
30.2.17	signalling.receptor kinases.DUF 26	at4g23150	3.988	protein kinase family protein | chr4:12125731-12128332 FORWARD
30.2.17	signalling.receptor kinases.DUF 26	at3g45860	1.396	receptor-like protein kinase, putative | chr3:16863401-16866041 REVERSE
30.2.17	signalling.receptor kinases.DUF 26	at4g23190	2.152	Symbols: CRK11, AT-RLK3 | CRK11 (CYSTEINE-RICH RLK11); kinase/ protein kinase | chr4:12141032-12143833 REVERSE
30.2.17	signalling.receptor kinases.DUF 26	at4g23200	1.113	protein kinase family protein | chr4:12145380-12147934 REVERSE
30.2.17	signalling.receptor kinases.DUF 26	at1g70740	0.472	protein kinase family protein | chr1:26673632-26675947 REVERSE
30.2.18	signalling.receptor kinases.extensin	at5g56890	-0.437	protein kinase family protein | chr5:23010523-23015671 REVERSE
30.2.19	signalling.receptor kinases.legume-lectin	at2g32800	1.481	Symbols: AP4.3A | AP4.3A; ATP binding / protein kinase/ protein serine/threonine kinase/ protein tyrosine kinase | chr2:13916452-13919179 FORWARD
30.2.19	signalling.receptor kinases.legume-lectin	at4g02410	0.958	lectin protein kinase family protein | chr4:1059889-1062153 REVERSE
30.2.19	signalling.receptor kinases.legume-lectin	at3g59700	1.686	Symbols: ATHLECRK, LECRK1 | ATHLECRK (ARABIDOPSIS THALIANA LECTIN-RECEPTOR KINASE); kinase | chr3:22052133-22054275 FORWARD
30.2.19	signalling.receptor kinases.legume-lectin	at3g08870	0.887	lectin protein kinase, putative | chr3:2700355-2702581 REVERSE
30.2.19	signalling.receptor kinases.legume-lectin	at4g02420	0.774	lectin protein kinase, putative | chr4:1064363-1066372 REVERSE
30.2.19	signalling.receptor kinases.legume-lectin	at4g29050	0.918	lectin protein kinase family protein | chr4:14314818-14316879 REVERSE
30.2.19	signalling.receptor kinases.legume-lectin	at4g04960	0.92	lectin protein kinase, putative | chr4:2533056-2535386 FORWARD
30.2.20	signalling.receptor kinases.wheat LRK10 like	at1g66880	1.317	serine/threonine protein kinase family protein | chr1:24946928-24955611 FORWARD
30.2.20	signalling.receptor kinases.wheat LRK10 like	at1g18390	1.041	ATP binding / kinase/ protein kinase/ protein serine/threonine kinase/ protein tyrosine kinase | chr1:6327463-6330098 FORWARD
30.2.20	signalling.receptor kinases.wheat LRK10 like	at1g66920	0.81	serine/threonine protein kinase, putative | chr1:24965410-24967432 REVERSE
30.2.20	signalling.receptor kinases.wheat LRK10 like	at5g38210	0.793	serine/threonine protein kinase family protein | chr5:15261005-15265630 FORWARD
30.2.21	signalling.receptor kinases.lysine motif	at2g23770	0.501	protein kinase family protein / peptidoglycan-binding LysM domain-containing protein | chr2:10120242-10122080 REVERSE
30.2.21	signalling.receptor kinases.lysine motif	at2g33580	1.721	protein kinase family protein / peptidoglycan-binding LysM domain-containing protein | chr2:14219623-14221861 REVERSE
30.2.22	signalling.receptor kinases.proline extensin like	at3g54590	0.905	Symbols: ATHRGP1 | ATHRGP1 (HYDROXYPROLINE-RICH GLYCOPROTEIN); structural constituent of cell wall | chr3:20206160-20208472 FORWARD
30.2.22	signalling.receptor kinases.proline extensin like	at3g24550	0.48	Symbols: ATPERK1 | ATPERK1 (PROLINE EXTENSIN-LIKE RECEPTOR KINASE 1); ATP binding / protein kinase | chr3:8960258-8963568 FORWARD
30.2.22	signalling.receptor kinases.proline extensin like	at1g52290	0.694	protein kinase family protein | chr1:19470033-19472449 REVERSE
30.2.23	signalling.receptor kinases.RKF3 like	at1g11050	0.939	protein kinase family protein | chr1:3681888-3684169 FORWARD
30.2.24	signalling.receptor kinases.S-locus glycoprotein like	at1g65800	0.763	Symbols: ARK2 | ARK2 (A. THALIANA RECEPTOR KINASE 2); kinase/ protein kinase/ transmembrane receptor protein serine/threonine kinase | chr1:24473121-24476715 FORWARD
30.2.24	signalling.receptor kinases.S-locus glycoprotein like	at1g34300	0.722	lectin protein kinase family protein | chr1:12503406-12506048 FORWARD
30.2.24	signalling.receptor kinases.S-locus glycoprotein like	at4g21390	1.342	Symbols: B120 | B120; ATP binding / protein kinase/ protein serine/threonine kinase/ sugar binding | chr4:11394355-11397583 REVERSE
30.2.24	signalling.receptor kinases.S-locus glycoprotein like	at1g61380	0.689	Symbols: SD1-29 | SD1-29 (S-DOMAIN-1 29); carbohydrate binding / kinase/ protein kinase | chr1:22646072-22649521 REVERSE
30.2.24	signalling.receptor kinases.S-locus glycoprotein like	at1g61430	0.525	S-locus protein kinase, putative | chr1:22664669-22668360 REVERSE
30.2.24	signalling.receptor kinases.S-locus glycoprotein like	at4g21380	0.666	Symbols: ARK3 | ARK3 (A. THALIANA RECEPTOR KINASE 3); kinase/ transmembrane receptor protein serine/threonine kinase | chr4:11388925-11393226 REVERSE
30.2.24	signalling.receptor kinases.S-locus glycoprotein like	at1g11300	0.727	ATP binding / carbohydrate binding / kinase/ protein kinase/ protein serine/threonine kinase/ protein tyrosine kinase/ sugar binding | chr1:3794238-3800719 FORWARD
30.2.24	signalling.receptor kinases.S-locus glycoprotein like	at4g11900	0.419	S-locus lectin protein kinase family protein | chr4:7150241-7153571 REVERSE
30.2.25	signalling.receptor kinases.wall associated kinase	at1g16130	1.67	Symbols: WAKL2 | WAKL2 (wall associated kinase-like 2); kinase | chr1:5525491-5528212 FORWARD
30.2.25	signalling.receptor kinases.wall associated kinase	at1g79680	2.149	wall-associated kinase, putative | chr1:29979973-29982773 REVERSE
30.2.25	signalling.receptor kinases.wall associated kinase	at1g21270	1.128	Symbols: WAK2 | WAK2; ATP binding / calcium ion binding / protein kinase/ protein serine/threonine kinase | chr1:7444931-7447549 FORWARD
30.2.25	signalling.receptor kinases.wall associated kinase	at1g79670	0.88	Symbols: RFO1, WAKL22 | RFO1 (RESISTANCE TO FUSARIUM OXYSPORUM 1); kinase | chr1:29976725-29979350 REVERSE
30.2.25	signalling.receptor kinases.wall associated kinase	at5g66790	0.819	protein kinase family protein | chr5:26665142-26667531 FORWARD
30.2.25	signalling.receptor kinases.wall associated kinase	at1g69730	0.83	protein kinase family protein | chr1:26228632-26231339 REVERSE
30.2.25	signalling.receptor kinases.wall associated kinase	at1g21250	0.908	Symbols: WAK1, PRO25 | WAK1 (CELL WALL-ASSOCIATED KINASE); kinase | chr1:7439266-7442113 FORWARD
30.2.25	signalling.receptor kinases.wall associated kinase	at1g21245	1.787	wall-associated kinase-related | chr1:7436842-7437342 FORWARD
30.2.25	signalling.receptor kinases.wall associated kinase	at1g16260	0.623	protein kinase family protein | chr1:5559579-5562113 REVERSE
30.2.25	signalling.receptor kinases.wall associated kinase	at1g16110	0.434	Symbols: WAKL6 | WAKL6 (wall associated kinase-like 6); kinase | chr1:5518373-5520891 FORWARD
30.2.26	signalling.receptor kinases.crinkly like	at3g55950	1.459	Symbols: CCR3, ATCRR3 | CCR3 (ARABIDOPSIS THALIANA CRINKLY4 RELATED 3); kinase | chr3:20753691-20756395 REVERSE
30.2.26	signalling.receptor kinases.crinkly like	at1g28390	0.309	protein kinase family protein | chr1:9966628-9968286 REVERSE
30.2.99	signalling.receptor kinases.misc	at1g03430	0.54	Symbols: AHP5 | AHP5 (HISTIDINE-CONTAINING PHOSPHOTRANSFER FACTOR 5); histidine phosphotransfer kinase | chr1:847873-849500 FORWARD
30.2.99	signalling.receptor kinases.misc	at2g37710	0.928	Symbols: RLK | RLK (receptor lectin kinase); kinase | chr2:15814718-15817004 REVERSE
30.2.99	signalling.receptor kinases.misc	at5g20050	0.356	protein kinase family protein | chr5:6774302-6775845 FORWARD
30.2.99	signalling.receptor kinases.misc	at5g01540	2.349	Symbols: LECRKA4.1 | LECRKA4.1 (LECTIN RECEPTOR KINASE A4.1); kinase | chr5:210979-213472 REVERSE
30.2.99	signalling.receptor kinases.misc	at1g51890	2.768	leucine-rich repeat protein kinase, putative | chr1:19274802-19278528 REVERSE
30.2.99	signalling.receptor kinases.misc	at1g51805	-0.709	leucine-rich repeat protein kinase, putative | chr1:19220977-19225689 REVERSE
30.2.99	signalling.receptor kinases.misc	at1g51850	0.737	leucine-rich repeat protein kinase, putative | chr1:19252847-19256783 REVERSE
30.2.99	signalling.receptor kinases.misc	at1g69270	1.083	Symbols: RPK1 | RPK1 (RECEPTOR-LIKE PROTEIN KINASE 1); kinase/ protein binding / receptor signaling protein serine/threonine kinase | chr1:26040689-26042702 REVERSE
30.2.99	signalling.receptor kinases.misc	at3g22060	0.882	receptor protein kinase-related | chr3:7771016-7772340 FORWARD
30.2.99	signalling.receptor kinases.misc	at3g60720	-0.68	Symbols: PDLP8 | PDLP8 (PLASMODESMATA-LOCATED PROTEIN 8) | chr3:22441771-22443771 FORWARD
30.2.99	signalling.receptor kinases.misc	at4g23170	0.91	Symbols: EP1 | EP1; protein kinase | chr4:12135093-12136157 FORWARD
30.2.99	signalling.receptor kinases.misc	at1g51790	1.316	kinase | chr1:19206711-19211417 REVERSE
30.3	signalling.calcium	at5g54490	2.333	Symbols: PBP1 | PBP1 (PINOID-BINDING PROTEIN 1); calcium ion binding / protein binding | chr5:22121404-22121931 FORWARD
30.3	signalling.calcium	at3g10300	1.196	calcium-binding EF hand family protein | chr3:3186321-3188301 FORWARD
30.3	signalling.calcium	at5g04870	0.634	Symbols: CPK1, ATCPK1 | CPK1 (CALCIUM DEPENDENT PROTEIN KINASE 1); calmodulin-dependent protein kinase/ kinase | chr5:1416783-1420338 REVERSE
30.3	signalling.calcium	at5g42380	1.553	Symbols: CML39, CML37 | CML37 (CALMODULIN LIKE 37); calcium ion binding | chr5:16942576-16943366 REVERSE
30.3	signalling.calcium	at3g57530	1.138	Symbols: CPK32, ATCPK32, CDPK32 | CPK32 (CALCIUM-DEPENDENT PROTEIN KINASE 32); calcium-dependent protein kinase C/ calmodulin-dependent protein kinase/ kinase/ protein binding | chr3:21296554-21299591 REVERSE
30.3	signalling.calcium	at5g07300	0.41	Symbols: BON2 | BON2 (BONZAI 2); calcium-dependent phospholipid binding | chr5:2299887-2303268 FORWARD
30.3	signalling.calcium	at1g18890	1.455	Symbols: ATCDPK1, CPK10 | ATCDPK1 (CALCIUM-DEPENDENT PROTEIN KINASE 1); calmodulin-dependent protein kinase/ kinase/ protein kinase | chr1:6522764-6525962 REVERSE
30.3	signalling.calcium	at3g03000	0.545	calmodulin, putative | chr3:677240-678084 FORWARD
30.3	signalling.calcium	at1g62480	-1.07	vacuolar calcium-binding protein-related | chr1:23128705-23129759 FORWARD
30.3	signalling.calcium	at4g35310	0.92	Symbols: CPK5, ATCPK5 | CPK5 (calmodulin-domain protein kinase 5); ATP binding / calcium ion binding / calmodulin-dependent protein kinase/ kinase/ protein kinase/ protein serine/threonine kinase | chr4:16801987-16804995 FORWARD
30.3	signalling.calcium	at3g43810	-0.254	Symbols: CAM7 | CAM7 (CALMODULIN 7); calcium ion binding | chr3:15664371-15666460 REVERSE
30.3	signalling.calcium	at5g61790	1.141	Symbols: CNX1, ATCNX1 | calnexin 1 (CNX1) | chr5:24827102-24829791 REVERSE
30.3	signalling.calcium	at5g39670	2.469	calcium-binding EF hand family protein | chr5:15883179-15884067 FORWARD
30.3	signalling.calcium	at3g57330	1.23	Symbols: ACA11 | ACA11 (autoinhibited Ca2+-ATPase 11); calcium-transporting ATPase/ calmodulin binding | chr3:21211456-21216375 REVERSE
30.3	signalling.calcium	at1g18210	0.825	calcium-binding protein, putative | chr1:6267969-6268828 REVERSE
30.3	signalling.calcium	at1g09210	1.169	calreticulin 2 (CRT2) | chr1:2972842-2976750 REVERSE
30.3	signalling.calcium	at4g37640	1.675	Symbols: ACA2 | ACA2 (CALCIUM ATPASE 2); calcium ion transmembrane transporter/ calcium-transporting ATPase/ calmodulin binding | chr4:17682977-17686941 REVERSE
30.3	signalling.calcium	at3g03950	-0.442	Symbols: ECT1 | protein binding | chr3:1021260-1024009 FORWARD
30.3	signalling.calcium	at2g26190	1.62	calmodulin-binding family protein | chr2:11147639-11150510 REVERSE
30.3	signalling.calcium	at5g61900	0.964	Symbols: BON1, CPN1, BON | BON1 (BONZAI 1); calcium-dependent phospholipid binding | chr5:24855661-24859341 REVERSE
30.3	signalling.calcium	at4g23650	0.613	Symbols: CDPK6, CPK3 | CDPK6 (CALCIUM-DEPENDENT PROTEIN KINASE 6); ATP binding / calcium ion binding / calmodulin-dependent protein kinase/ kinase/ protein kinase/ protein serine/threonine kinase | chr4:12324758-12327459 REVERSE
30.3	signalling.calcium	at5g07340	0.833	calnexin, putative | chr5:2317213-2319649 FORWARD
30.3	signalling.calcium	at2g41110	0.824	Symbols: CAM2, ATCAL5 | CAM2 (CALMODULIN 2); calcium ion binding / protein binding | chr2:17140311-17141431 FORWARD
30.3	signalling.calcium	at4g33050	2.1	Symbols: EDA39 | EDA39 (embryo sac development arrest 39); calmodulin binding | chr4:15944453-15947026 REVERSE
30.3	signalling.calcium	at4g25800	0.67	calmodulin-binding protein | chr4:13124898-13127953 FORWARD
30.3	signalling.calcium	at3g28140	0.699	calmodulin-binding protein | chr3:10470401-10471216 FORWARD
30.3	signalling.calcium	at1g66400	1.483	calmodulin-related protein, putative | chr1:24770575-24771371 REVERSE
30.3	signalling.calcium	at5g12480	1.049	Symbols: CPK7 | CPK7 (calmodulin-domain protein kinase 7); ATP binding / calcium ion binding / calmodulin-dependent protein kinase/ kinase/ protein kinase/ protein serine/threonine kinase/ protein tyrosine kinase | chr5:4047515-4050533 REVERSE
30.3	signalling.calcium	at5g53010	0.514	calcium-transporting ATPase, putative | chr5:21488490-21496537 REVERSE
30.3	signalling.calcium	at2g41090	0.453	calmodulin-like calcium-binding protein, 22 kDa (CaBP-22) | chr2:17135721-17136852 FORWARD
30.3	signalling.calcium	at3g49260	-0.709	Symbols: iqd21 | iqd21 (IQ-domain 21); calmodulin binding | chr3:18262430-18266021 FORWARD
30.3	signalling.calcium	at4g28600	-0.575	Symbols: NPGR2 | NPGR2 (no pollen germination related 2); calmodulin binding | chr4:14129311-14132799 FORWARD
30.3	signalling.calcium	at3g51920	0.514	Symbols: CAM9, CML9, ATCML9 | CAM9 (CALMODULIN 9); calcium ion binding | chr3:19268043-19269479 REVERSE
30.3	signalling.calcium	at1g74690	-0.56	Symbols: IQD31 | IQD31 (IQ-domain 31); calmodulin binding | chr1:28061159-28064625 REVERSE
30.3	signalling.calcium	at5g19450	-0.552	Symbols: CDPK19, CPK8 | CDPK19 (CALCIUM-DEPENDENT PROTEIN KINASE 19); ATP binding / calcium ion binding / calmodulin-dependent protein kinase/ kinase/ protein kinase/ protein serine/threonine kinase | chr5:6558426-6561534 REVERSE
30.3	signalling.calcium	at5g10660	0.484	calmodulin-binding protein-related | chr5:3370518-3371934 FORWARD
30.3	signalling.calcium	at3g01830	3.392	calmodulin-related protein, putative | chr3:296054-297133 FORWARD
30.3	signalling.calcium	at3g22910	1.768	calcium-transporting ATPase, plasma membrane-type, putative / Ca(2+)-ATPase, putative (ACA13) | chr3:8116335-8119388 REVERSE
30.3	signalling.calcium	at1g73805	1.814	calmodulin binding | chr1:27745427-27749178 REVERSE
30.3	signalling.calcium	at3g63380	2.549	calcium-transporting ATPase, plasma membrane-type, putative / Ca(2+)-ATPase, putative (ACA12) | chr3:23406611-23410360 REVERSE
30.3	signalling.calcium	at5g28830	0.588	calcium-binding EF hand family protein | chr5:10856791-10858668 FORWARD
30.3	signalling.calcium	at1g73630	-0.553	calcium-binding protein, putative | chr1:27684736-27685453 FORWARD
30.3	signalling.calcium	at2g43290	0.583	Symbols: MSS3 | MSS3 (multicopy suppressors of snf4 deficiency in yeast 3); calcium ion binding | chr2:17991052-17992047 REVERSE
30.3	signalling.calcium	at3g22930	2.47	calmodulin, putative | chr3:8124083-8125931 REVERSE
30.3	signalling.calcium	at3g47480	2.929	calcium-binding EF hand family protein | chr3:17496354-17496947 REVERSE
30.3	signalling.calcium	at4g34150	0.78	C2 domain-containing protein | chr4:16354946-16357293 FORWARD
30.3	signalling.calcium	at5g24270	0.542	Symbols: SOS3, CBL4 | SOS3 (SALT OVERLY SENSITIVE 3); calcium ion binding / calcium-dependent protein serine/threonine phosphatase | chr5:8238781-8240366 REVERSE
30.3	signalling.calcium	at4g33000	-0.888	Symbols: CBL10, ATCBL10 | CBL10 (CALCINEURIN B-LIKE 10); calcium ion binding | chr4:15924349-15926628 FORWARD
30.3	signalling.calcium	at5g62570	1.125	calmodulin-binding protein | chr5:25114391-25116967 FORWARD
30.3	signalling.calcium	at1g08450	1.836	Symbols: CRT3 | CRT3 (CALRETICULIN 3); calcium ion binding / unfolded protein binding | chr1:2667825-2671832 REVERSE
30.3	signalling.calcium	at1g27460	-0.711	Symbols: NPGR1 | NPGR1 (NO POLLEN GERMINATION RELATED 1); calmodulin binding | chr1:9534532-9537561 FORWARD
30.3	signalling.calcium	at1g56340	0.533	Symbols: CRT1 | CRT1 (CALRETICULIN 1); calcium ion binding / unfolded protein binding | chr1:21089844-21092660 REVERSE
30.3	signalling.calcium	at3g29000	1.612	calcium-binding EF hand family protein | chr3:11005779-11006414 FORWARD
30.3	signalling.calcium	at4g09570	0.857	Symbols: CPK4, ATCPK4 | CPK4; calmodulin-dependent protein kinase/ kinase/ protein kinase | chr4:6049517-6052335 FORWARD
30.3	signalling.calcium	at1g76040	1.286	Symbols: CPK29 | CPK29; ATP binding / calcium ion binding / calmodulin-dependent protein kinase/ kinase/ protein kinase/ protein serine/threonine kinase/ protein tyrosine kinase | chr1:28537673-28540637 FORWARD
30.3	signalling.calcium	at5g57580	0.541	calmodulin-binding protein | chr5:23314716-23318125 REVERSE
30.3	signalling.calcium	at3g25600	1.182	calcium ion binding | chr3:9307254-9307967 FORWARD
30.3	signalling.calcium	at3g56800	0.626	Symbols: CAM3, acam-3 | CAM3 (CALMODULIN 3); calcium ion binding | chr3:21034537-21036077 REVERSE
30.3	signalling.calcium	at5g08580	-0.655	calcium-binding EF hand family protein | chr5:2780512-2783066 REVERSE
30.3	signalling.calcium	at1g65540	0.747	calcium-binding EF hand family protein | chr1:24362382-24366011 REVERSE
30.4	signalling.phosphinositides	at2g03890	0.561	phosphatidylinositol 3- and 4-kinase family protein | chr2:1185522-1188545 FORWARD
30.4	signalling.phosphinositides	at1g17340	0.661	phosphoinositide phosphatase family protein | chr1:5933870-5938761 FORWARD
30.4	signalling.phosphinositides	at3g51830	0.359	Symbols: ATG5, SAC8 | ATG5; phosphatidylinositol-4,5-bisphosphate 5-phosphatase | chr3:19220121-19225280 FORWARD
30.4	signalling.phosphinositides	at1g64460	0.634	phosphatidylinositol 3- and 4-kinase family protein | chr1:23943499-23944680 REVERSE
30.4.1	signalling.phosphinositides.phosphatidylinositol-4-phosphate 5-kinase	at1g21920	0.635	MORN (Membrane Occupation and Recognition Nexus) repeat-containing protein /phosphatidylinositol-4-phosphate 5-kinase-related | chr1:7704255-7706140 REVERSE
30.4.1	signalling.phosphinositides.phosphatidylinositol-4-phosphate 5-kinase	at1g77660	1.185	MORN (Membrane Occupation and Recognition Nexus) repeat-containing protein /phosphatidylinositol-4-phosphate 5-kinase-related | chr1:29185899-29187825 REVERSE
30.4.1	signalling.phosphinositides.phosphatidylinositol-4-phosphate 5-kinase	at4g33240	0.305	1-phosphatidylinositol-4-phosphate 5-kinase/ ATP binding / phosphatidylinositol phosphate kinase/ protein binding / zinc ion binding | chr4:16029252-16037634 REVERSE
30.4.1	signalling.phosphinositides.phosphatidylinositol-4-phosphate 5-kinase	at1g10900	0.441	phosphatidylinositol-4-phosphate 5-kinase family protein | chr1:3632234-3637141 REVERSE
30.4.1	signalling.phosphinositides.phosphatidylinositol-4-phosphate 5-kinase	at3g09920	0.482	Symbols: PIP5K9 | PIP5K9 (PHOSPHATIDYL INOSITOL MONOPHOSPHATE 5 KINASE); 1-phosphatidylinositol-4-phosphate 5-kinase/ ATP binding / phosphatidylinositol phosphate kinase | chr3:3040303-3043912 REVERSE
30.4.3	signalling.phosphinositides.bis(5''-nucleosyl)-tetraphosphatase	at3g10620	-0.519	Symbols: ATNUDX26 | ATNUDX26 (ARABIDOPSIS THALIANA NUDIX HYDROLASE HOMOLOG 26); bis(5'-adenosyl)-pentaphosphatase/ bis(5'-nucleosyl)-tetraphosphatase (asymmetrical) | chr3:3320263-3321724 FORWARD
30.5	signalling.G-proteins	at1g48570	-0.597	zinc finger (Ran-binding) family protein | chr1:17955278-17957719 REVERSE
30.5	signalling.G-proteins	at5g02040	0.755	Symbols: PRA1.A1 | PRA1.A1 (PRENYLATED RAB ACCEPTOR 1.A1) | chr5:400899-402951 FORWARD
30.5	signalling.G-proteins	at5g57960	-0.568	GTP-binding family protein | chr5:23462770-23466503 REVERSE
30.5	signalling.G-proteins	at2g44100	0.494	Symbols: ATGDI1, AT-GDI1 | ATGDI1 (ARABIDOPSIS THALIANA GUANOSINE NUCLEOTIDE DIPHOSPHATE DISSOCIATION INHIBITOR 1); RAB GDP-dissociation inhibitor | chr2:18241692-18246498 FORWARD
30.5	signalling.G-proteins	at4g18430	2.868	Symbols: AtRABA1e | AtRABA1e (Arabidopsis Rab GTPase homolog A1e); GTP binding | chr4:10183717-10185280 REVERSE
30.5	signalling.G-proteins	at5g03520	-0.421	Symbols: ATRAB8C, ATRABE1D, ATRAB-E1D, RAB-E1D | ATRAB8C; GTP binding | chr5:883447-885425 FORWARD
30.5	signalling.G-proteins	at5g64990	0.704	Symbols: AtRABH1a | AtRABH1a (Arabidopsis Rab GTPase homolog H1a); GTP binding | chr5:25963562-25964792 REVERSE
30.5	signalling.G-proteins	at1g56050	-0.914	GTP-binding protein-related | chr1:20963719-20966341 FORWARD
30.5	signalling.G-proteins	at5g53570	0.615	RabGAP/TBC domain-containing protein | chr5:21760590-21763462 REVERSE
30.5	signalling.G-proteins	at3g59920	0.421	Symbols: ATGDI2 | ATGDI2 (RAB GDP DISSOCIATION INHIBITOR 2); RAB GDP-dissociation inhibitor | chr3:22134999-22138457 FORWARD
30.5	signalling.G-proteins	at4g39890	1.389	Symbols: AtRABH1c | AtRABH1c (Arabidopsis Rab GTPase homolog H1c); GTP binding / protein binding | chr4:18505962-18507586 FORWARD
30.5	signalling.G-proteins	at5g45760	-0.482	transducin family protein / WD-40 repeat family protein | chr5:18561111-18563195 FORWARD
30.5	signalling.G-proteins	at3g07410	-0.291	Symbols: AtRABA5b | AtRABA5b (Arabidopsis Rab GTPase homolog A5b); GTP binding | chr3:2372317-2373556 REVERSE
30.5	signalling.G-proteins	at4g07524	-0.382	GTP-binding protein, putative | chr4:4345348-4345975 REVERSE
30.5	signalling.G-proteins	at4g18800	0.514	Symbols: ATHSGBP, ATRAB11B, ATRABA1D | ATRABA1D (ARABIDOPSIS RAB GTPASE HOMOLOG A1D); GTP binding | chr4:10319862-10321551 REVERSE
30.5	signalling.G-proteins	at3g13710	-0.524	Symbols: PRA1.F4 | PRA1.F4 (PRENYLATED RAB ACCEPTOR 1.F4) | chr3:4490628-4493831 REVERSE
30.5	signalling.G-proteins	at5g50120	0.784	transducin family protein / WD-40 repeat family protein | chr5:20382615-20383874 REVERSE
30.5	signalling.G-proteins	at1g48630	-1.053	Symbols: RACK1B_AT | RACK1B_AT (RECEPTOR FOR ACTIVATED C KINASE 1 B); nucleotide binding | chr1:17981773-17983327 REVERSE
30.5	signalling.G-proteins	at1g07140	0.37	Symbols: SIRANBP | SIRANBP; Ran GTPase binding | chr1:2191723-2193793 REVERSE
30.5	signalling.G-proteins	at3g60860	0.62	guanine nucleotide exchange family protein | chr3:22484804-22491722 FORWARD
30.5	signalling.G-proteins	at3g46060	-0.391	Symbols: ARA3, ARA-3, ATRABE1C, ATRAB8A | ATRAB8A; GTP binding | chr3:16917589-16920018 FORWARD
30.5	signalling.G-proteins	at3g63420	0.998	Symbols: AGG1, ATAGG1 | AGG1 (Arabidopsis Ggamma-subunit 1); GTP binding | chr3:23417272-23418640 FORWARD
30.5	signalling.G-proteins	at3g05010	0.527	transmembrane protein, putative | chr3:1389449-1391675 FORWARD
30.5	signalling.G-proteins	at1g07620	-0.59	FUNCTIONS IN: molecular_function unknown; INVOLVED IN: biological_process unknown; LOCATED IN: cellular_component unknown; CONTAINS InterPro DOMAIN/s: GTP-binding protein Obg/CgtA (InterPro:IPR014100); BEST Arabidopsis thaliana protein match is: unknown protein (TAIR:AT5G02390.1); Has 447 Blast hits to 405 proteins in 72 species: Archae - 0; Bacteria - 6; Metazoa - 43; Fungi - 29; Plants - 122; V…
30.5	signalling.G-proteins	at3g59570	0.71	RabGAP/TBC domain-containing protein | chr3:22000832-22006056 REVERSE
30.5	signalling.G-proteins	at4g13730	0.379	RabGAP/TBC domain-containing protein | chr4:7970274-7974248 FORWARD
30.5	signalling.G-proteins	at5g56230	1.042	Symbols: PRA1.G2 | PRA1.G2 (PRENYLATED RAB ACCEPTOR 1.G2) | chr5:22758768-22759371 REVERSE
30.5	signalling.G-proteins	at5g60860	-0.483	Symbols: AtRABA1f | AtRABA1f (Arabidopsis Rab GTPase homolog A1f); GTP binding | chr5:24484622-24485705 FORWARD
30.5	signalling.G-proteins	at5g13300	-0.365	Symbols: SFC, VAN3, AGD3 | SFC (SCARFACE); ARF GTPase activator/ phosphoinositide binding | chr5:4255601-4262314 REVERSE
30.5	signalling.G-proteins	at5g17790	-0.474	Symbols: VAR3 | VAR3 (VARIEGATED 3); binding / zinc ion binding | chr5:5869710-5872718 REVERSE
30.5	signalling.G-proteins	at4g05410	-0.56	transducin family protein / WD-40 repeat family protein | chr4:2742932-2745627 REVERSE
30.5	signalling.G-proteins	at5g52210	0.541	Symbols: ATARLB1, ATGB1 | ATGB1 (ARABIDOPSIS THALIANA GTP-BINDING PROTEIN 1); GTP binding | chr5:21204991-21207097 FORWARD
30.5	signalling.G-proteins	at2g44610	0.384	Symbols: RAB6, ATRABH1B, ATRAB6A, RAB6A | RAB6A; GTP binding / protein binding | chr2:18411426-18414081 REVERSE
30.5	signalling.G-proteins	at4g38430	-0.483	Symbols: ATROPGEF1, ROPGEF1 | ROPGEF1; Rho guanyl-nucleotide exchange factor/ protein binding | chr4:17986466-17988807 FORWARD
30.5	signalling.G-proteins	at1g02280	-0.924	Symbols: TOC33, ATTOC33, PPI1 | TOC33 (TRANSLOCON AT THE OUTER ENVELOPE MEMBRANE OF CHLOROPLASTS 33); GTP binding / GTPase/ protein binding | chr1:448463-450425 REVERSE
30.5	signalling.G-proteins	at3g06540	0.697	GDP dissociation inhibitor family protein / Rab GTPase activator family protein | chr3:2035003-2037788 REVERSE
30.5	signalling.G-proteins	at5g45130	0.66	Symbols: ATRAB5A, ATRABF2A, RABF2A, RAB5A, RHA1, ATRAB-F2A, RAB-F2A | RHA1 (RAB HOMOLOG 1); GTP binding | chr5:18244266-18246450 FORWARD
30.5	signalling.G-proteins	at4g13350	0.558	Symbols: NIG | NIG (NSP (NUCLEAR SHUTTLE PROTEIN)-INTERACTING GTPASE); GTP binding / GTPase | chr4:7769770-7773666 REVERSE
30.5	signalling.G-proteins	at5g59150	-0.437	Symbols: ATRABA2D, ATRAB-A2D | ATRABA2D (HOARABIDOPSIS RAB GTPASE HOMOLOG A2D); GTP binding | chr5:23876586-23878429 FORWARD
30.5	signalling.G-proteins	at4g34460	0.756	Symbols: AGB1, ELK4, ATAGB1 | AGB1 (GTP BINDING PROTEIN BETA 1); GTPase/ nucleotide binding / protein binding | chr4:16477106-16479528 REVERSE
30.5	signalling.G-proteins	at4g34390	1.173	Symbols: XLG2 | XLG2 (extra-large GTP-binding protein 2); guanyl nucleotide binding / signal transducer | chr4:16441179-16445005 FORWARD
30.5	signalling.G-proteins	at5g55190	0.301	Symbols: RAN3, ATRAN3 | RAN3 (RAN GTPASE 3); GTP binding / GTPase/ protein binding | chr5:22392176-22394172 FORWARD
30.5	signalling.G-proteins	at3g54190	0.437	FUNCTIONS IN: molecular_function unknown; INVOLVED IN: biological_process unknown; EXPRESSED IN: 22 plant structures; EXPRESSED DURING: 13 growth stages; CONTAINS InterPro DOMAIN/s: WD40 repeat-like (InterPro:IPR011046); BEST Arabidopsis thaliana protein match is: unknown protein (TAIR:AT2G38630.1); Has 77 Blast hits to 77 proteins in 20 species: Archae - 0; Bacteria - 0; Metazoa - 0; Fungi - 0; …
30.5	signalling.G-proteins	at5g20010	0.728	Symbols: RAN-1, RAN1, ATRAN1 | RAN-1; GTP binding / GTPase/ protein binding | chr5:6760284-6762094 FORWARD
30.5	signalling.G-proteins	at3g22942	0.796	Symbols: AGG2 | AGG2 (G-PROTEIN GAMMA SUBUNIT 2) | chr3:8134190-8136204 FORWARD
30.5	signalling.G-proteins	at5g07110	-0.683	Symbols: PRA1.B6 | PRA1.B6 (PRENYLATED RAB ACCEPTOR 1.B6) | chr5:2206000-2206928 FORWARD
30.5	signalling.G-proteins	at1g52280	-0.717	Symbols: AtRABG3d | AtRABG3d (Arabidopsis Rab GTPase homolog G3d); GTP binding | chr1:19467969-19469586 REVERSE
30.6	signalling.MAP kinases	at3g21220	0.594	Symbols: ATMKK5, ATMAP2K_ALPHA, MAP2K_A, MKK5, ATMEK5, MEK5 | ATMKK5 (ARABIDOPSIS THALIANA MITOGEN-ACTIVATED PROTEIN KINASE KINASE 5); MAP kinase kinase/ kinase | chr3:7445757-7447351 FORWARD
30.6	signalling.MAP kinases	at1g51660	1.309	Symbols: ATMKK4, MKK4, ATMEK4 | ATMKK4 (ARABIDOPSIS THALIANA MITOGEN-ACTIVATED PROTEIN KINASE KINASE 4); MAP kinase kinase/ kinase | chr1:19154323-19155947 FORWARD
30.6	signalling.MAP kinases	at4g01370	0.766	Symbols: ATMPK4, MPK4 | ATMPK4 (ARABIDOPSIS THALIANA MAP KINASE 4); MAP kinase/ kinase | chr4:567095-569088 FORWARD
30.6	signalling.MAP kinases	at1g10210	0.58	Symbols: ATMPK1, MPK1 | ATMPK1 (MITOGEN-ACTIVATED PROTEIN KINASE 1); MAP kinase/ kinase | chr1:3349219-3351180 FORWARD
30.6	signalling.MAP kinases	at5g66850	0.451	Symbols: MAPKKK5 | MAPKKK5; ATP binding / kinase/ protein kinase/ protein serine/threonine kinase | chr5:26695607-26699324 REVERSE
30.6	signalling.MAP kinases	at1g01560	3.023	Symbols: ATMPK11 | ATMPK11; MAP kinase/ kinase | chr1:202136-204189 FORWARD
30.6	signalling.MAP kinases	at4g08500	0.872	Symbols: MEKK1, ATMEKK1, MAPKKK8, ARAKIN | MEKK1 (MAP KINASE KINASE KINASE 1); DNA binding / MAP kinase kinase kinase/ kinase/ kinase binding / protein binding | chr4:5403753-5407301 REVERSE
30.6	signalling.MAP kinases	at1g73500	1.618	Symbols: ATMKK9, MKK9 | MKK9 (MAP KINASE KINASE 9); MAP kinase kinase/ kinase/ protein kinase activator | chr1:27639091-27640529 REVERSE
30.6	signalling.MAP kinases	at1g73670	0.509	Symbols: ATMPK15 | ATMPK15; MAP kinase/ kinase | chr1:27700050-27703440 FORWARD
30.6	signalling.MAP kinases	at1g18160	0.497	protein kinase family protein | chr1:6248793-6254039 FORWARD
30.6	signalling.MAP kinases	at4g26070	0.965	Symbols: MEK1, NMAPKK, ATMEK1, MKK1 | MEK1 (MAP KINASE/ ERK KINASE 1); MAP kinase kinase/ kinase/ protein binding | chr4:13217681-13219933 FORWARD
30.6	signalling.MAP kinases	at4g29810	0.822	Symbols: ATMKK2, MKK2, MK1 | ATMKK2 (ARABIDOPSIS THALIANA MAP KINASE KINASE 2); MAP kinase kinase/ kinase | chr4:14593039-14595269 REVERSE
30.7	signalling.14-3-3 proteins	at1g22300	0.396	Symbols: GRF10, 14-3-3EPSILON, GF14 EPSILON | GRF10 (GENERAL REGULATORY FACTOR 10); ATP binding / protein binding / protein phosphorylated amino acid binding | chr1:7878769-7881219 REVERSE
30.7	signalling.14-3-3 proteins	at5g10450	0.423	Symbols: GRF6, AFT1, 14-3-3lambda | GRF6 (G-box regulating factor 6); protein binding / protein phosphorylated amino acid binding | chr5:3283853-3286317 REVERSE
30.7	signalling.14-3-3 proteins	at5g16050	0.401	Symbols: GRF5, GF14 UPSILON | GRF5 (GENERAL REGULATORY FACTOR 5); ATP binding / protein binding / protein phosphorylated amino acid binding | chr5:5243745-5245820 REVERSE
30.7	signalling.14-3-3 proteins	at5g38480	-0.563	Symbols: GRF3, RCI1 | GRF3 (GENERAL REGULATORY FACTOR 3); ATP binding / protein binding / protein phosphorylated amino acid binding | chr5:15409697-15411516 FORWARD
30.7	signalling.14-3-3 proteins	at4g09000	0.606	Symbols: GRF1, GF14 CHI | 14-3-3-like protein GF14 chi / general regulatory factor 1 (GRF1) | chr4:5775210-5777481 FORWARD
30.7	signalling.14-3-3 proteins	at1g35160	-0.32	Symbols: GRF4, 14-3-3PHI, GF14 PHI | GF14 PHI (GF14 PROTEIN PHI CHAIN); protein binding / protein phosphorylated amino acid binding | chr1:12867181-12868793 FORWARD
30.7	signalling.14-3-3 proteins	at1g78300	-0.616	Symbols: GRF2, 14-3-3OMEGA, GF14 OMEGA | GRF2 (GENERAL REGULATORY FACTOR 2); protein binding / protein phosphorylated amino acid binding | chr1:29461671-29463385 FORWARD
30.8	signalling.misc	at3g05490	-0.375	Symbols: RALFL22 | RALFL22 (ralf-like 22); signal transducer | chr3:1591277-1591983 FORWARD
30.8	signalling.misc	at3g16570	-0.375	Symbols: RALFL23 | RALFL23 (ralf-like 23); signal transducer | chr3:5644698-5645414 FORWARD
30.9	signalling.lipids	at1g60490	0.741	Symbols: ATVPS34, VPS34 | ATVPS34; 1-phosphatidylinositol-3-kinase/ binding / inositol or phosphatidylinositol kinase/ phosphotransferase, alcohol group as acceptor | chr1:22285572-22290315 REVERSE
30.11	signalling.light	at1g30440	-0.633	phototropic-responsive NPH3 family protein | chr1:10759475-10762394 FORWARD
30.11	signalling.light	at4g29080	-0.729	Symbols: PAP2, IAA27 | PAP2 (PHYTOCHROME-ASSOCIATED PROTEIN 2); transcription factor | chr4:14323361-14325328 REVERSE
30.11	signalling.light	at4g38180	0.641	Symbols: FRS5 | FRS5 (FAR1-related sequence 5); zinc ion binding | chr4:17906514-17909677 REVERSE
30.11	signalling.light	at3g22380	0.358	Symbols: TIC | TIC (TIME FOR COFFEE) | chr3:7912905-7919510 FORWARD
30.11	signalling.light	at3g45780	-0.612	Symbols: PHOT1, NPH1, JK224, RPT1 | PHOT1 (PHOTOTROPIN 1); FMN binding / blue light photoreceptor/ kinase/ protein binding / protein serine/threonine kinase | chr3:16816866-16824210 FORWARD
30.11	signalling.light	at2g46340	-0.5	Symbols: SPA1 | SPA1 (SUPPRESSOR OF PHYA-105 1); protein binding / signal transducer | chr2:19022173-19027413 REVERSE
30.11	signalling.light	at4g16250	0.837	Symbols: PHYD | PHYD (PHYTOCHROME DEFECTIVE D); G-protein coupled photoreceptor/ red or far-red light photoreceptor/ signal transducer | chr4:9195602-9199486 REVERSE
30.11	signalling.light	at5g18960	-0.472	Symbols: FRS12 | FRS12 (FAR1-related sequence 12); zinc ion binding | chr5:6330379-6333071 FORWARD
30.11	signalling.light	at5g35840	-0.404	Symbols: PHYC | PHYC (phytochrome defective c); protein histidine kinase | chr5:14007826-14011764 FORWARD
30.11	signalling.light	at4g37590	-0.33	Symbols: NPY5 | NPY5 (NAKED PINS IN YUC MUTANTS 5); protein binding / signal transducer | chr4:17662842-17666428 REVERSE
30.11	signalling.light	at5g48150	0.485	Symbols: PAT1 | PAT1 (phytochrome a signal transduction 1); signal transducer/ transcription factor | chr5:19522255-19524653 REVERSE
30.11	signalling.light	at4g31820	-0.495	Symbols: ENP, NPY1, MAB4 | ENP (ENHANCER OF PINOID); protein binding / signal transducer | chr4:15390650-15394430 REVERSE
30.11	signalling.light	at1g67310	0.537	calmodulin binding / transcription regulator | chr1:25198182-25203126 REVERSE
30.11	signalling.light	at2g32250	0.752	Symbols: FRS2 | FRS2 (FAR1-related sequence 2); zinc ion binding | chr2:13693105-13696932 FORWARD
30.11	signalling.light	at4g18810	-0.644	binding / catalytic/ transcription repressor | chr4:10322438-10325770 REVERSE
30.11	signalling.light	at4g18130	-0.325	Symbols: PHYE | PHYE (PHYTOCHROME DEFECTIVE E); G-protein coupled photoreceptor/ protein histidine kinase/ signal transducer | chr4:10042137-10046082 REVERSE
30.11	signalling.light	at1g18810	-0.427	phytochrome kinase substrate-related | chr1:6485596-6487030 REVERSE
30.11	signalling.light	at1g51790	1.316	kinase | chr1:19206711-19211417 REVERSE
30.11	signalling.light	at5g28490	-0.68	Symbols: LSH1 | LSH1 (LIGHT-DEPENDENT SHORT HYPOCOTYLS 1) | chr5:10454393-10455196 REVERSE
30.11.1	signalling.light.COP9 signalosome	at1g22920	0.397	Symbols: CSN5A, JAB1, AJH1 | CSN5A (COP9 SIGNALOSOME 5A) | chr1:8109714-8112051 REVERSE
30.12	signalling.gravity	at1g68370	0.381	Symbols: ARG1 | ARG1 (ALTERED RESPONSE TO GRAVITY 1); cytoskeletal protein binding | chr1:25631745-25634738 REVERSE
30.99	signalling.unspecified	at5g05850	0.519	leucine-rich repeat family protein | chr5:1762405-1764678 REVERSE
30.99	signalling.unspecified	at1g78610	-0.443	Symbols: MSL6 | MSL6 (MECHANOSENSITIVE CHANNEL OF SMALL CONDUCTANCE-LIKE 6) | chr1:29569030-29572126 REVERSE

## Sheet: Pseudo specific
*Signalling genes showing Psedudomonas specific expressions. Positively regulated log2 values are marked with light red colour
BinCode	BinName	id	bactspecificlog2.txt	description
30.1.1	signalling.in sugar and nutrient physiology	at5g48410	1.478	Symbols: ATGLR1.3, GLR1.3 | ATGLR1.3; intracellular ligand-gated ion channel | chr5:19620267-19623425 FORWARD
30.1.1	signalling.in sugar and nutrient physiology	at5g09440	1.513	Symbols: EXL4 | EXL4 (EXORDIUM LIKE 4) | chr5:2938347-2939461 FORWARD
30.1.1	signalling.in sugar and nutrient physiology	at5g48400	1.13	Symbols: ATGLR1.2, GLR1.2 | ATGLR1.2; intracellular ligand-gated ion channel | chr5:19616244-19619246 FORWARD
30.2.1	signalling.receptor kinases.leucine rich repeat I	at1g51870	0.558	protein kinase family protein | chr1:19262879-19267001 REVERSE
30.2.2	signalling.receptor kinases.leucine rich repeat II	at1g60800	-0.706	Symbols: NIK3 | NIK3 (NSP-INTERACTING KINASE 3); kinase | chr1:22383453-22387457 REVERSE
30.2.4	signalling.receptor kinases.leucine rich repeat IV	at2g45340	-0.539	leucine-rich repeat transmembrane protein kinase, putative | chr2:18691722-18694725 FORWARD
30.2.6	signalling.receptor kinases.leucine rich repeat VI	at3g03770	-0.669	leucine-rich repeat transmembrane protein kinase, putative | chr3:945135-949038 REVERSE
30.2.6	signalling.receptor kinases.leucine rich repeat VI	at5g63410	-0.577	leucine-rich repeat transmembrane protein kinase, putative | chr5:25394984-25398153 REVERSE
30.2.9	signalling.receptor kinases.leucine rich repeat IX	at1g66150	-0.922	Symbols: TMK1 | TMK1 (TRANSMEMBRANE KINASE 1); transmembrane receptor protein serine/threonine kinase | chr1:24631409-24634749 FORWARD
30.2.11	signalling.receptor kinases.leucine rich repeat XI	at4g26540	-1.018	kinase | chr4:13394522-13398112 REVERSE
30.2.11	signalling.receptor kinases.leucine rich repeat XI	at5g65700	-0.572	Symbols: BAM1 | BAM1 (BARELY ANY MERISTEM 1); ATP binding / kinase/ protein serine/threonine kinase | chr5:26281757-26285247 FORWARD
30.2.13	signalling.receptor kinases.leucine rich repeat XIII	at2g26330	-0.701	Symbols: ER, QRP1 | ER (ERECTA); transmembrane receptor protein kinase | chr2:11208183-11213971 REVERSE
30.2.17	signalling.receptor kinases.DUF 26	at1g70520	-0.581	protein kinase family protein | chr1:26584729-26587419 REVERSE
30.2.17	signalling.receptor kinases.DUF 26	at4g11480	-0.84	protein kinase family protein | chr4:6971408-6973799 FORWARD
30.2.20	signalling.receptor kinases.wheat LRK10 like	at1g69910	-0.539	protein kinase family protein | chr1:26330114-26332266 FORWARD
30.2.24	signalling.receptor kinases.S-locus glycoprotein like	at1g11410	-0.779	S-locus protein kinase, putative | chr1:3841286-3844432 FORWARD
30.2.99	signalling.receptor kinases.misc	at1g33260	1.153	protein kinase family protein | chr1:12064509-12066376 FORWARD
30.3	signalling.calcium	at2g38800	0.536	calmodulin-binding protein-related | chr2:16216999-16219159 FORWARD
30.3	signalling.calcium	at5g49480	0.881	Symbols: ATCP1 | ATCP1 (Ca2+-binding protein 1); calcium ion binding | chr5:20070743-20071638 FORWARD
30.3	signalling.calcium	at2g41010	-0.546	Symbols: ATCAMBP25 | ATCAMBP25 (ARABIDOPSIS THALIANA CALMODULIN (CAM)-BINDING PROTEIN OF 25 KDA); calmodulin binding | chr2:17113866-17114804 REVERSE
30.3	signalling.calcium	at2g41560	-1.022	Symbols: ACA4 | ACA4 (AUTO-INHIBITED CA(2+)-ATPASE, ISOFORM 4); calcium-transporting ATPase/ calmodulin binding | chr2:17332084-17337269 REVERSE
30.3	signalling.calcium	at3g52290	-0.479	Symbols: IQD3 | IQD3 (IQ-domain 3); calmodulin binding | chr3:19393819-19396403 FORWARD
30.3	signalling.calcium	at2g43680	0.899	Symbols: IQD14 | IQD14; calmodulin binding | chr2:18108349-18111831 FORWARD
30.3	signalling.calcium	at5g03040	-0.635	Symbols: iqd2 | iqd2 (IQ-domain 2); calmodulin binding | chr5:710102-712788 REVERSE
30.3	signalling.calcium	at3g52870	0.905	calmodulin-binding family protein | chr3:19593173-19595822 REVERSE
30.3	signalling.calcium	at2g33380	2.817	Symbols: RD20 | RD20 (RESPONSIVE TO DESSICATION 20); calcium ion binding | chr2:14144831-14146471 REVERSE
30.4	signalling.phosphinositides	at3g59770	0.49	Symbols: SAC9 | SAC9; inositol or phosphatidylinositol phosphatase | chr3:22079033-22086149 REVERSE
30.4	signalling.phosphinositides	at2g29700	0.393	Symbols: ATPH1 | ATPH1 (ARABIDOPSIS THALIANA PLECKSTRIN HOMOLOGUE 1); phosphoinositide binding | chr2:12697420-12698167 FORWARD
30.4	signalling.phosphinositides	at4g20260	0.8	Symbols: ATPCAP1, PCAP1 | DREPP plasma membrane polypeptide family protein | chr4:10940739-10943502 FORWARD
30.4.1	signalling.phosphinositides.phosphatidylinositol-4-phosphate 5-kinase	at1g60890	0.757	phosphatidylinositol-4-phosphate 5-kinase family protein | chr1:22412246-22417244 REVERSE
30.4.4	signalling.phosphinositides.phosphoinositide phospholipase C	at5g58670	0.587	Symbols: ATPLC1, ATPLC, PLC1 | PLC1 (PHOSPHOLIPASE C 1); phospholipase C | chr5:23704231-23706800 REVERSE
30.5	signalling.G-proteins	at3g15060	0.507	Symbols: AtRABA1g | AtRABA1g (Arabidopsis Rab GTPase homolog A1g); GTP binding | chr3:5069166-5070200 FORWARD
30.5	signalling.G-proteins	at1g06400	0.465	Symbols: ARA2, ATRABA1A, ATRAB11E, ARA-2 | ARA-2; GTP binding | chr1:1950844-1952785 REVERSE
30.5	signalling.G-proteins	at3g02460	0.544	plant adhesion molecule, putative | chr3:505434-508428 FORWARD
30.5	signalling.G-proteins	at5g59840	0.445	Ras-related GTP-binding family protein | chr5:24107215-24109251 REVERSE
30.5	signalling.G-proteins	at1g09180	0.73	Symbols: ATSAR1, ATSARA1A | ATSARA1A (ARABIDOPSIS THALIANA SECRETION-ASSOCIATED RAS SUPER FAMILY 1); GTP binding | chr1:2965023-2965972 FORWARD
30.5	signalling.G-proteins	at5g47200	0.445	Symbols: ATRABD2B, ATRAB1A | ATRAB1A; GTP binding | chr5:19166902-19169026 FORWARD
30.5	signalling.G-proteins	at3g53610	0.457	Symbols: ATRAB8, AtRab8B, AtRABE1a | ATRAB8; GTP binding | chr3:19876232-19878519 REVERSE
30.5	signalling.G-proteins	at5g03530	-0.716	Symbols: ATRAB ALPHA, ATRAB, ATRAB18B, ATRABC2A, RABC2A | RABC2A (RAB GTPASE HOMOLOG C2A); GTP binding / GTP-dependent protein binding / myosin XI tail binding | chr5:885522-887390 REVERSE
30.5	signalling.G-proteins	at4g27540	0.565	Symbols: PRA1.H | PRA1.H (PRENYLATED RAB ACCEPTOR 1.H) | chr4:13753210-13754745 REVERSE
30.5	signalling.G-proteins	at3g09910	1.197	Symbols: ATRAB18C, ATRABC2B | ATRABC2B (ARABIDOPSIS RAB GTPASE HOMOLOG C2B); ATP binding / GTP binding / transcription factor binding | chr3:3036714-3038429 REVERSE
30.5	signalling.G-proteins	at3g54840	0.437	Symbols: ARA6, ATRABF1, ARA-6, ATRAB5C | ARA6; GTP binding / GTPase | chr3:20318412-20321001 FORWARD
30.5	signalling.G-proteins	at2g31680	0.413	Symbols: AtRABA5d | AtRABA5d (Arabidopsis Rab GTPase homolog A5d); GTP binding | chr2:13473594-13475052 REVERSE
30.5	signalling.G-proteins	at5g42080	0.382	Symbols: ADL1, ADL1A, AG68, DRP1A, RSW9 | ADL1 (ARABIDOPSIS DYNAMIN-LIKE PROTEIN); GTP binding / GTPase/ protein binding | chr5:16820284-16824756 REVERSE
30.5	signalling.G-proteins	at1g22740	-0.573	Symbols: RAB7, ATRABG3B, RAB75, RABG3B | RABG3B; GTP binding | chr1:8049100-8050708 FORWARD
30.5	signalling.G-proteins	at5g47960	0.524	Symbols: SMG1, ATRABA4C | ATRABA4C; GTP binding | chr5:19421384-19422533 REVERSE
30.6	signalling.MAP kinases	at2g18170	0.937	Symbols: ATMPK7, MPK7 | ATMPK7 (ARABIDOPSIS THALIANA MAP KINASE 7); MAP kinase/ kinase | chr2:7907804-7909923 REVERSE
30.6	signalling.MAP kinases	at1g53570	0.53	Symbols: MAP3KA, MAPKKK3 | MAP3KA; ATP binding / kinase/ protein kinase/ protein serine/threonine kinase | chr1:19987266-19991113 FORWARD
30.6	signalling.MAP kinases	at1g05100	2.428	Symbols: MAPKKK18 | MAPKKK18; ATP binding / kinase/ protein kinase/ protein serine/threonine kinase | chr1:1469610-1470881 FORWARD
30.8	signalling.misc	at4g14010	-0.537	Symbols: RALFL32 | RALFL32 (ralf-like 32); signal transducer | chr4:8092833-8093382 REVERSE
30.10	signalling.phosphorelay	at3g21510	0.676	Symbols: AHP1 | AHP1 (HISTIDINE-CONTAINING PHOSPHOTRANSMITTER 1); histidine phosphotransfer kinase | chr3:7578175-7579599 REVERSE
30.11	signalling.light	at3g15570	-1.443	phototropic-responsive NPH3 family protein | chr3:5269849-5271922 REVERSE
30.11	signalling.light	at3g26740	0.539	Symbols: CCL | CCL (CCR-LIKE) | chr3:9827801-9828680 FORWARD
30.11	signalling.light	at3g19850	-1.394	phototropic-responsive NPH3 family protein | chr3:6898181-6901255 REVERSE
30.11	signalling.light	at3g22104	-0.679	phototropic-responsive NPH3 protein-related | chr3:7789376-7792380 FORWARD
30.11	signalling.light	at2g02950	-0.793	Symbols: PKS1 | PKS1 (PHYTOCHROME KINASE SUBSTRATE 1); protein binding | chr2:854947-856538 REVERSE
30.11	signalling.light	at2g18790	0.72	Symbols: PHYB, HY3, OOP1 | PHYB (PHYTOCHROME B); G-protein coupled photoreceptor/ protein histidine kinase/ red or far-red light photoreceptor/ signal transducer | chr2:8139881-8144430 FORWARD
30.11	signalling.light	at5g67385	-0.639	protein binding / signal transducer | chr5:26884664-26887204 FORWARD
30.11	signalling.light	at2g43010	-0.848	Symbols: PIF4, SRL2 | PIF4 (phytochrome interacting factor 4); DNA binding / protein binding / transcription factor | chr2:17886427-17889050 FORWARD
30.99	signalling.unspecified	at1g53470	2.367	Symbols: MSL4 | MSL4 (MECHANOSENSITIVE CHANNEL OF SMALL CONDUCTANCE-LIKE 4) | chr1:19958587-19961578 FORWARD
30.99	signalling.unspecified	at5g05930	0.491	guanylyl cyclase-related (GC1) | chr5:1779974-1783412 REVERSE
