# Supplementary material for: Molecular Signatures in Arabidopsis thaliana in Response to Insect Attack and Bacterial Infection
Source: PLoS One. 2013 Mar 25;8(3):e58987. doi: 10.1371/journal.pone.0058987 (PMC3607608; doi:10.1371/journal.pone.0058987)
Supplement: File S7 — List of the 31 heat shock protein (HSP) genes that were differentially expressed only during aphid treatment and their log2-transformed expression values. (XLS) [file pone.0058987.s007.xls]

## Sheet: MapManExport
HSPs differentailly expressed during aphid treatment.
BinCode	BinName	id	aphidspecifilog2.txt	description
20.2.1	stress.abiotic.heat	at2g26890	0.476	GRV2, KAM2 | GRV2 (GRAVITROPISM DEFECTIVE 2); binding / heat shock protein binding | chr211462067-11473841 REVERSE
20.2.1	stress.abiotic.heat	at5g09540	0.497	DNAJ heat shock N-terminal domain-containing protein | chr52962216-2963264 REVERSE
20.2.1	stress.abiotic.heat	at5g57710	0.541	heat shock protein-related | chr523384794-23388353 FORWARD
20.2.1	stress.abiotic.heat	at5g42020	1.266	BIP, BIP2 | BIP2; ATP binding | chr516807483-16810646 REVERSE
20.2.1	stress.abiotic.heat	at5g22060	1.128	ATJ2, J2 | ATJ2; protein binding | chr57303622-7305797 REVERSE
20.2.1	stress.abiotic.heat	at5g37670	0.725	15.7 kDa class I-related small heat shock protein-like (HSP15.7-CI) | chr514968991-14969509 FORWARD
20.2.1	stress.abiotic.heat	at1g28210	0.431	ATJ1 | ATJ1; heat shock protein binding / nucleic acid binding / unfolded protein binding / zinc ion binding | chr19854546-9860158 FORWARD
20.2.1	stress.abiotic.heat	at3g09440	0.897	heat shock cognate 70 kDa protein 3 (HSC70-3) (HSP70-3) | chr32903199-2905724 REVERSE
20.2.1	stress.abiotic.heat	at1g79930	0.36	HSP91 | HSP91; ATP binding | chr130063478-30067547 REVERSE
20.2.1	stress.abiotic.heat	at4g39960	-0.401	DNAJ heat shock family protein | chr418533755-18536618 FORWARD
20.2.1	stress.abiotic.heat	at5g02500	0.459	HSC70-1, HSP70-1, AT-HSC70-1, HSC70 | HSC70-1 (HEAT SHOCK COGNATE PROTEIN 70-1); ATP binding | chr5553745-556442 REVERSE
20.2.1	stress.abiotic.heat	at4g18880	1.681	AT-HSFA4A, HSF A4A | AT-HSFA4A; DNA binding / transcription factor | chr410347582-10349562 REVERSE
20.2.1	stress.abiotic.heat	at5g64360	0.362	DNAJ heat shock N-terminal domain-containing protein | chr525737071-25738667 REVERSE
20.2.1	stress.abiotic.heat	at3g12580	0.996	HSP70 | HSP70 (heat shock protein 70); ATP binding | chr33991261-3993792 REVERSE
20.2.1	stress.abiotic.heat	at1g24120	-0.483	ARL1 | ARL1 (ARG1-LIKE 1); heat shock protein binding / unfolded protein binding | chr18529143-8532212 REVERSE
20.2.1	stress.abiotic.heat	at4g28480	0.418	DNAJ heat shock family protein | chr414073042-14075271 FORWARD
20.2.1	stress.abiotic.heat	at5g28540	1.443	BIP1 | BIP1; ATP binding | chr510540460-10543375 REVERSE
20.2.1	stress.abiotic.heat	at4g24190	1.302	SHD, HSP90.7 | SHD (SHEPHERD); ATP binding / unfolded protein binding | chr412551717-12555909 REVERSE
20.2.1	stress.abiotic.heat	at3g44110	0.438	ATJ3, ATJ | ATJ3; protein binding | chr315868794-15871256 REVERSE
20.2.1	stress.abiotic.heat	at4g16660	1.007	heat shock protein 70, putative / HSP70, putative | chr49376737-9381507 FORWARD
20.2.1	stress.abiotic.heat	at1g71000	-1.168	heat shock protein binding | chr126769336-26770111 REVERSE
20.2.1	stress.abiotic.heat	at5g56030	0.469	HSP81-2, ERD8, HSP90.2 | HSP81-2 (HEAT SHOCK PROTEIN 81-2); ATP binding | chr522686802-22689650 FORWARD
20.2.1	stress.abiotic.heat	at4g39150	-0.414	DNAJ heat shock N-terminal domain-containing protein | chr418233485-18236064 REVERSE
20.2.1	stress.abiotic.heat	at1g79940	0.306	ATERDJ2A | ATERDJ2A; heat shock protein binding / unfolded protein binding | chr130069550-30073332 FORWARD
20.2.1	stress.abiotic.heat	at1g21080	0.543	DNAJ heat shock N-terminal domain-containing protein | chr17378589-7382462 REVERSE
20.2.1	stress.abiotic.heat	at1g09080	1.503	BIP3 | BIP3; ATP binding | chr12929217-2931841 REVERSE
20.2.1	stress.abiotic.heat	at5g18750	0.618	DNAJ heat shock N-terminal domain-containing protein | chr56255177-6257932 FORWARD
20.2.1	stress.abiotic.heat	at1g80920	0.484	J8 | J8; heat shock protein binding / unfolded protein binding | chr130403644-30404690 REVERSE
20.2.1	stress.abiotic.heat	at3g62600	0.873	ATERDJ3B | ATERDJ3B; heat shock protein binding / unfolded protein binding | chr323150790-23153510 REVERSE
20.2.1	stress.abiotic.heat	at5g56010	0.61	HSP81-3 | HSP81-3; ATP binding / unfolded protein binding | chr522681305-22684129 FORWARD
20.2.1	stress.abiotic.heat	at2g47440	-0.782	DNAJ heat shock N-terminal domain-containing protein | chr219469719-19471886 FORWARD
20.2.1	stress.abiotic.heat	at5g56000	0.572	heat shock protein 81-4 (HSP81-4) | chr522677451-22680152 REVERSE
20.2.1	stress.abiotic.heat	at2g20550	-1.027	DNAJ chaperone C-terminal domain-containing protein | chr28845802-8847309 REVERSE
20.2.1	stress.abiotic.heat	at5g03160	0.705	ATP58IPK | ATP58IPK (ARABIDOPSIS HOMOLOG OF MAMALLIAN P58IPK); binding / heat shock protein binding | chr5750109-752805 FORWARD
20.2.1	stress.abiotic.heat	at5g09590	0.454	MTHSC70-2, HSC70-5 | MTHSC70-2 (MITOCHONDRIAL HSP70 2); ATP binding | chr52975548-2978750 FORWARD
20.2.1	stress.abiotic.heat	at5g52640	1.639	HSP81-1, ATHS83, HSP81.1, HSP83, ATHSP90.1 | ATHSP90.1 (HEAT SHOCK PROTEIN 90.1); ATP binding / unfolded protein binding | chr521352399-21355361 FORWARD
20.2.1	stress.abiotic.heat	at5g20970	-0.653	heat shock family protein | chr57122800-7124001 FORWARD
