# Supplementary material for: Molecular Signatures in Arabidopsis thaliana in Response to Insect Attack and Bacterial Infection
Source: PLoS One. 2013 Mar 25;8(3):e58987. doi: 10.1371/journal.pone.0058987 (PMC3607608; doi:10.1371/journal.pone.0058987)
Supplement: File S8 — List of the proteolyitc enzymes differentially expressed during the aphid and P. syringae treatments. (XLS) [file pone.0058987.s008.xls]

## Sheet: proteolysis-aphid
List of the proteolyitc enzymes differentially expressed during the B. brassicae
BinCode	BinName	id	aphidspecifilog2.txt	description
29.5	protein.degradation	at1g02170	0.348	Symbols: LOL3, ATMCPB1, MCP1B, AMC1, ATMC1 | AMC1 (METACASPASE 1); cysteine-type endopeptidase | chr1:411779-413554 FORWARD
29.5	protein.degradation	at1g35340	-0.593	ATP-dependent protease La (LON) domain-containing protein | chr1:12977765-12979910 FORWARD
29.5	protein.degradation	at1g79340	0.404	Symbols: AtMC4 | AtMC4 (metacaspase 4); cysteine-type peptidase | chr1:29842771-29844638 FORWARD
29.5	protein.degradation	at1g19740	-0.4	ATP-dependent protease La (LON) domain-containing protein | chr1:6824322-6825459 FORWARD
29.5	protein.degradation	at2g31865	1.023	poly (ADP-ribose) glycohydrolase (PARG) family protein | chr2:13546596-13549536 REVERSE
29.5	protein.degradation	at5g19740	-0.77	peptidase M28 family protein | chr5:6673933-6676859 FORWARD
29.5	protein.degradation	at2g03120	0.668	Symbols: ATSPP | ATSPP (ARABIDOPSIS SIGNAL PEPTIDE PEPTIDASE); aspartic-type endopeptidase | chr2:937420-940339 FORWARD
29.5	protein.degradation	at3g05350	-0.453	aminopeptidase/ hydrolase | chr3:1526963-1533867 REVERSE
29.5	protein.degradation	at4g25110	0.821	Symbols: AtMC2 | AtMC2 (metacaspase 2); cysteine-type endopeptidase | chr4:12887518-12890262 REVERSE
29.5	protein.degradation	at5g64240	0.732	Symbols: AtMC3 | AtMC3 (metacaspase 3); cysteine-type endopeptidase | chr5:25695620-25697416 FORWARD
29.5	protein.degradation	at5g49570	1.015	Symbols: AtPNG1 | AtPNG1 (Arabidopsis thaliana peptide-N-glycanase 1); catalytic/ peptide-N4-(N-acetyl-beta-glucosaminyl)asparagine amidase | chr5:20111859-20116185 REVERSE
29.5	protein.degradation	at5g35220	-0.795	Symbols: EGY1 | EGY1 (ETHYLENE-DEPENDENT GRAVITROPISM-DEFICIENT AND YELLOW-GREEN 1); metalloendopeptidase | chr5:13484431-13487584 REVERSE
29.5	protein.degradation	at2g18600	0.546	RUB1-conjugating enzyme, putative | chr2:8073200-8074982 REVERSE
29.5	protein.degradation	at1g50380	0.5	prolyl oligopeptidase family protein | chr1:18662309-18666478 FORWARD
29.5	protein.degradation	at4g17830	0.407	peptidase M20/M25/M40 family protein | chr4:9915831-9918243 FORWARD
29.5	protein.degradation	at2g14260	-0.751	Symbols: PIP | PIP; aminopeptidase | chr2:6041253-6043974 REVERSE
29.5	protein.degradation	at5g56530	-0.926	unknown protein | chr5:22889226-22891769 FORWARD
29.5	protein.degradation	at4g29490	-0.433	aminopeptidase/ manganese ion binding | chr4:14487894-14491525 FORWARD
29.5.1	protein.degradation.subtilases	at4g34980	-0.674	Symbols: SLP2 | SLP2; serine-type peptidase | chr4:16656691-16659339 REVERSE
29.5.1	protein.degradation.subtilases	at3g14067	0.494	subtilase family protein | chr3:4658198-4660784 REVERSE
29.5.1	protein.degradation.subtilases	at4g30020	-1.68	subtilase family protein | chr4:14677285-14681956 FORWARD
29.5.1	protein.degradation.subtilases	at2g19170	-0.776	Symbols: SLP3 | SLP3; serine-type peptidase | chr2:8314005-8318596 REVERSE
29.5.1	protein.degradation.subtilases	at5g51750	-0.526	Symbols: ATSBT1.3, SBT1.3 | ATSBT1.3 (ARABIDOPSIS THALIANA SUBTILASE 1.3); identical protein binding / serine-type endopeptidase | chr5:21020207-21022781 FORWARD
29.5.1	protein.degradation.subtilases	at4g20430	-0.781	subtilase family protein | chr4:11017656-11021280 REVERSE
29.5.1	protein.degradation.subtilases	at2g05920	-0.437	subtilase family protein | chr2:2269515-2272229 REVERSE
29.5.2	protein.degradation.autophagy	at5g54730	0.753	Symbols: ATATG18F, ATG18F | AtATG18f | chr5:22233789-22237341 REVERSE
29.5.2	protein.degradation.autophagy	at2g31260	0.484	Symbols: APG9, ATAPG9 | APG9 (autophagy 9) | chr2:13322021-13327400 REVERSE
29.5.2	protein.degradation.autophagy	at3g56440	0.857	Symbols: ATATG18D | AtATG18d | chr3:20926001-20928988 FORWARD
29.5.3	protein.degradation.cysteine protease	at4g33620	0.638	Ulp1 protease family protein | chr4:16147692-16152853 FORWARD
29.5.3	protein.degradation.cysteine protease	at3g57810	-0.661	OTU-like cysteine protease family protein | chr3:21415784-21417948 FORWARD
29.5.3	protein.degradation.cysteine protease	at1g09730	0.498	Ulp1 protease family protein | chr1:3147667-3154236 REVERSE
29.5.3	protein.degradation.cysteine protease	at4g35350	-1.028	Symbols: XCP1 | XCP1 (XYLEM CYSTEINE PEPTIDASE 1); cysteine-type endopeptidase/ cysteine-type peptidase | chr4:16810482-16812009 FORWARD
29.5.3	protein.degradation.cysteine protease	at3g02070	0.702	OTU-like cysteine protease family protein | chr3:360921-363429 FORWARD
29.5.3	protein.degradation.cysteine protease	at5g60190	0.35	Ulp1 protease family protein | chr5:24234541-24236163 FORWARD
29.5.3	protein.degradation.cysteine protease	at3g45310	0.941	cysteine proteinase, putative | chr3:16628384-16630521 REVERSE
29.5.4	protein.degradation.aspartate protease	at5g04710	-0.445	aspartyl aminopeptidase, putative | chr5:1356990-1360247 REVERSE
29.5.4	protein.degradation.aspartate protease	at1g66180	0.663	aspartyl protease family protein | chr1:24647188-24648813 FORWARD
29.5.4	protein.degradation.aspartate protease	at3g12700	-0.834	aspartyl protease family protein | chr3:4037070-4039134 FORWARD
29.5.4	protein.degradation.aspartate protease	at3g20015	-0.792	aspartic-type endopeptidase | chr3:6978477-6980368 REVERSE
29.5.4	protein.degradation.aspartate protease	at3g51330	2.146	aspartyl protease family protein | chr3:19053368-19056224 REVERSE
29.5.4	protein.degradation.aspartate protease	at1g05840	0.454	aspartyl protease family protein | chr1:1762734-1766281 REVERSE
29.5.4	protein.degradation.aspartate protease	at1g49050	1.355	aspartyl protease family protein | chr1:18150538-18153361 FORWARD
29.5.4	protein.degradation.aspartate protease	at1g01300	-0.659	aspartyl protease family protein | chr1:116943-118764 FORWARD
29.5.4	protein.degradation.aspartate protease	at1g79720	-1.018	aspartyl protease family protein | chr1:29997127-29999045 REVERSE
29.5.5	protein.degradation.serine protease	at3g53780	0.747	Symbols: ATRBL4 | rhomboid family protein | chr3:19924568-19927026 REVERSE
29.5.5	protein.degradation.serine protease	at3g07950	-0.527	rhomboid protein-related | chr3:2531852-2534504 FORWARD
29.5.5	protein.degradation.serine protease	at1g63120	-0.534	Symbols: ATRBL2 | ATRBL2 (Arabidopsis thaliana Rhomboid-like 2); serine-type endopeptidase | chr1:23408876-23410815 REVERSE
29.5.5	protein.degradation.serine protease	at2g22990	-0.786	Symbols: SNG1, SCPL8 | SNG1 (SINAPOYLGLUCOSE 1); serine-type carboxypeptidase/ sinapoylglucose-malate O-sinapoyltransferase | chr2:9786316-9790179 FORWARD
29.5.5	protein.degradation.serine protease	at4g12910	-0.783	Symbols: scpl20 | scpl20 (serine carboxypeptidase-like 20); serine-type carboxypeptidase | chr4:7550433-7553332 REVERSE
29.5.5	protein.degradation.serine protease	at2g23000	-0.673	Symbols: scpl10 | scpl10 (serine carboxypeptidase-like 10); serine-type carboxypeptidase | chr2:9792212-9795863 FORWARD
29.5.5	protein.degradation.serine protease	at1g09130	-0.552	ATP-dependent Clp protease proteolytic subunit, putative | chr1:2939570-2942267 REVERSE
29.5.5	protein.degradation.serine protease	at1g73300	-0.963	Symbols: scpl2 | scpl2 (serine carboxypeptidase-like 2); serine-type carboxypeptidase | chr1:27559673-27562048 REVERSE
29.5.5	protein.degradation.serine protease	at3g02110	-0.795	Symbols: scpl25 | scpl25 (serine carboxypeptidase-like 25); serine-type carboxypeptidase | chr3:370762-373722 REVERSE
29.5.5	protein.degradation.serine protease	at2g33530	0.81	Symbols: scpl46 | scpl46 (serine carboxypeptidase-like 46); serine-type carboxypeptidase | chr2:14197646-14200560 REVERSE
29.5.5	protein.degradation.serine protease	at1g07200	0.833	ATP-dependent Clp protease ClpB protein-related | chr1:2208719-2212546 REVERSE
29.5.5	protein.degradation.serine protease	at4g36195	-0.742	serine carboxypeptidase S28 family protein | chr4:17127113-17129931 FORWARD
29.5.5	protein.degradation.serine protease	at5g42240	-0.97	Symbols: scpl42 | scpl42 (serine carboxypeptidase-like 42); serine-type carboxypeptidase | chr5:16888226-16891192 FORWARD
29.5.5	protein.degradation.serine protease	at3g61980	0.549	serine protease inhibitor, Kazal-type family protein | chr3:22956139-22956883 REVERSE
29.5.7	protein.degradation.metalloprotease	at3g57460	1.665	catalytic/ metal ion binding / metalloendopeptidase/ zinc ion binding | chr3:21263086-21265797 REVERSE
29.5.7	protein.degradation.metalloprotease	at5g58870	-0.714	Symbols: ftsh9 | ftsh9 (FtsH protease 9); ATP-dependent peptidase/ ATPase/ metallopeptidase | chr5:23769811-23773780 REVERSE
29.5.7	protein.degradation.metalloprotease	at3g16290	-0.353	Symbols: EMB2083 | EMB2083 (embryo defective 2083); ATP binding / ATP-dependent peptidase/ ATPase/ metalloendopeptidase/ metallopeptidase/ nucleoside-triphosphatase/ nucleotide binding / serine-type endopeptidase | chr3:5521071-5524995 REVERSE
29.5.7	protein.degradation.metalloprotease	at4g23940	-0.766	FtsH protease, putative | chr4:12437108-12441968 FORWARD
29.5.7	protein.degradation.metalloprotease	at3g04340	-0.437	Symbols: emb2458 | emb2458 (embryo defective 2458); ATP binding / ATPase/ metalloendopeptidase/ nucleoside-triphosphatase/ nucleotide binding | chr3:1146800-1153341 REVERSE
29.5.9	protein.degradation.AAA type	at3g28510	4.5	AAA-type ATPase family protein | chr3:10685524-10687364 FORWARD
29.5.9	protein.degradation.AAA type	at3g50930	3.494	Symbols: BCS1 | BCS1 (CYTOCHROME BC1 SYNTHESIS); ATP binding / ATPase/ nucleoside-triphosphatase/ nucleotide binding | chr3:18929526-18931839 FORWARD
29.5.9	protein.degradation.AAA type	at1g64110	1.333	AAA-type ATPase family protein | chr1:23796719-23801725 REVERSE
29.5.9	protein.degradation.AAA type	at5g57480	1.324	AAA-type ATPase family protein | chr5:23279406-23280968 REVERSE
29.5.9	protein.degradation.AAA type	at5g16930	-0.507	AAA-type ATPase family protein | chr5:5568393-5571859 FORWARD
29.5.9	protein.degradation.AAA type	at3g28580	3.028	AAA-type ATPase family protein | chr3:10715623-10717329 FORWARD
29.5.9	protein.degradation.AAA type	at3g28540	2.063	AAA-type ATPase family protein | chr3:10694444-10696123 FORWARD
29.5.9	protein.degradation.AAA type	at1g50140	-0.385	ATP binding / ATPase/ nucleoside-triphosphatase/ nucleotide binding | chr1:18569735-18578702 REVERSE
29.5.9	protein.degradation.AAA type	at5g17760	1.434	AAA-type ATPase family protein | chr5:5860421-5862422 REVERSE
29.5.9	protein.degradation.AAA type	at5g64580	-0.517	AAA-type ATPase family protein | chr5:25817092-25821530 REVERSE
29.5.11	protein.degradation.ubiquitin	at1g26270	0.372	phosphatidylinositol 3- and 4-kinase family protein | chr1:9089524-9092457 REVERSE
29.5.11	protein.degradation.ubiquitin	at2g46500	0.458	phosphatidylinositol 3- and 4-kinase family protein / ubiquitin family protein | chr2:19086561-19088964 REVERSE
29.5.11	protein.degradation.ubiquitin	at4g10570	0.351	Symbols: UBP9 | UBP9 (UBIQUITIN-SPECIFIC PROTEASE 9); cysteine-type endopeptidase/ ubiquitin thiolesterase | chr4:6523255-6528173 REVERSE
29.5.11	protein.degradation.ubiquitin	at1g77870	-0.805	Symbols: MUB5 | MUB5 (MEMBRANE-ANCHORED UBIQUITIN-FOLD PROTEIN 5 PRECURSOR) | chr1:29285078-29285889 FORWARD
29.5.11	protein.degradation.ubiquitin	at2g26920	0.504	ubiquitin-associated (UBA)/TS-N domain-containing protein | chr2:11489004-11491751 FORWARD
29.5.11	protein.degradation.ubiquitin	at4g38930	0.644	ubiquitin fusion degradation UFD1 family protein | chr4:18149534-18151776 FORWARD
29.5.11	protein.degradation.ubiquitin	at5g50430	0.356	Symbols: UBC33 | UBC33 (ubiquitin-conjugating enzyme 33); ubiquitin-protein ligase | chr5:20534173-20537117 REVERSE
29.5.11	protein.degradation.ubiquitin	at1g19270	0.557	Symbols: DA1 | DA1 (DA 1); ubiquitin binding | chr1:6662501-6666028 FORWARD
29.5.11	protein.degradation.ubiquitin	at1g43690	-0.664	ubiquitin interaction motif-containing protein | chr1:16478247-16482837 FORWARD
29.5.11	protein.degradation.ubiquitin	at2g16920	0.209	Symbols: UBC23, PFU2 | UBC23 (UBIQUITIN-CONJUGATING ENZYME 23); small conjugating protein ligase/ ubiquitin-protein ligase | chr2:7334226-7339167 REVERSE
29.5.11.1	protein.degradation.ubiquitin.ubiquitin	at4g05050	0.631	Symbols: UBQ11 | UBQ11 (UBIQUITIN 11); protein binding | chr4:2588004-2589386 REVERSE
29.5.11.1	protein.degradation.ubiquitin.ubiquitin	at2g30100	-0.436	ubiquitin family protein | chr2:12847828-12852092 FORWARD
29.5.11.1	protein.degradation.ubiquitin.ubiquitin	at3g13235	0.79	ubiquitin family protein | chr3:4271258-4274455 REVERSE
29.5.11.1	protein.degradation.ubiquitin.ubiquitin	at5g55170	1.05	Symbols: SUM3, SUMO 3, SUMO3, ATSUMO3 | SUMO3 (SMALL UBIQUITIN-LIKE MODIFIER 3); protein binding / protein tag | chr5:22385307-22386114 REVERSE
29.5.11.2	protein.degradation.ubiquitin.E1	at2g30110	0.338	Symbols: ATUBA1, MOS5 | ATUBA1; ubiquitin activating enzyme/ ubiquitin-protein ligase | chr2:12852372-12857617 REVERSE
29.5.11.3	protein.degradation.ubiquitin.E2	at1g50490	-0.628	Symbols: UBC20 | UBC20 (ubiquitin-conjugating enzyme 20); ubiquitin-protein ligase | chr1:18704805-18706478 REVERSE
29.5.11.3	protein.degradation.ubiquitin.E2	at3g15355	0.769	Symbols: UBC25, PFU1 | UBC25 (UBIQUITIN-CONJUGATING ENZYME 25); small conjugating protein ligase | chr3:5183739-5186929 FORWARD
29.5.11.3	protein.degradation.ubiquitin.E2	at5g42990	0.65	Symbols: UBC18 | UBC18 (ubiquitin-conjugating enzyme 18); small conjugating protein ligase/ ubiquitin-protein ligase | chr5:17243987-17245988 REVERSE
29.5.11.3	protein.degradation.ubiquitin.E2	at5g59300	-0.431	Symbols: UBC7, ATUBC7 | UBC7 (UBIQUITIN CARRIER PROTEIN 7); protein binding / ubiquitin-protein ligase | chr5:23919868-23921291 REVERSE
29.5.11.3	protein.degradation.ubiquitin.E2	at1g70660	0.432	Symbols: MMZ2, UEV1B | MMZ2 (MMS ZWEI HOMOLOGE 2); protein binding / ubiquitin-protein ligase | chr1:26640595-26642149 FORWARD
29.5.11.3	protein.degradation.ubiquitin.E2	at4g27960	0.706	Symbols: UBC9 | UBC9 (UBIQUITIN CONJUGATING ENZYME 9); ubiquitin-protein ligase | chr4:13915820-13917420 REVERSE
29.5.11.3	protein.degradation.ubiquitin.E2	at1g45050	0.544	Symbols: ATUBC2-1, UBC15 | ATUBC2-1; ubiquitin-protein ligase | chr1:17031281-17033198 FORWARD
29.5.11.3	protein.degradation.ubiquitin.E2	at3g13550	0.399	Symbols: FUS9, EMB144, COP10, CIN4 | FUS9 (FUSCA 9); protein binding / ubiquitin-protein ligase | chr3:4423349-4424883 REVERSE
29.5.11.3	protein.degradation.ubiquitin.E2	at2g16740	-0.446	Symbols: UBC29 | UBC29 (ubiquitin-conjugating enzyme 29); ubiquitin-protein ligase | chr2:7267722-7268942 FORWARD
29.5.11.3	protein.degradation.ubiquitin.E2	at1g78870	0.388	Symbols: UBC35, UBC13A | UBC35 (UBIQUITIN-CONJUGATING ENZYME 35); protein binding / ubiquitin-protein ligase | chr1:29650463-29652517 FORWARD
29.5.11.4.1	protein.degradation.ubiquitin.E3.HECT	at4g38600	0.548	Symbols: KAK, UPL3 | KAK (KAKTUS); ubiquitin-protein ligase | chr4:18041031-18049292 REVERSE
29.5.11.4.1	protein.degradation.ubiquitin.E3.HECT	at3g17205	0.61	Symbols: UPL6 | UPL6 (UBIQUITIN PROTEIN LIGASE 6); ubiquitin-protein ligase | chr3:5873294-5881525 FORWARD
29.5.11.4.2	protein.degradation.ubiquitin.E3.RING	at5g01980	0.555	zinc finger (C3HC4-type RING finger) family protein | chr5:375215-377208 FORWARD
29.5.11.4.2	protein.degradation.ubiquitin.E3.RING	at3g43430	0.677	zinc finger (C3HC4-type RING finger) family protein | chr3:15354535-15355304 REVERSE
29.5.11.4.2	protein.degradation.ubiquitin.E3.RING	at1g26800	0.971	zinc finger (C3HC4-type RING finger) family protein | chr1:9285099-9286324 REVERSE
29.5.11.4.2	protein.degradation.ubiquitin.E3.RING	at1g72175	0.667	zinc finger (C3HC4-type RING finger) family protein | chr1:27157875-27159558 FORWARD
29.5.11.4.2	protein.degradation.ubiquitin.E3.RING	at1g01680	2.755	U-box domain-containing protein | chr1:246411-248367 REVERSE
29.5.11.4.2	protein.degradation.ubiquitin.E3.RING	at5g65200	0.635	Symbols: PUB38, ATPUB38 | PUB38 (PLANT U-BOX 38); ubiquitin-protein ligase | chr5:26048065-26049952 REVERSE
29.5.11.4.2	protein.degradation.ubiquitin.E3.RING	at1g55530	0.495	zinc finger (C3HC4-type RING finger) family protein | chr1:20729182-20731283 REVERSE
29.5.11.4.2	protein.degradation.ubiquitin.E3.RING	at1g69330	-0.32	zinc finger (C3HC4-type RING finger) family protein | chr1:26063816-26065505 REVERSE
29.5.11.4.2	protein.degradation.ubiquitin.E3.RING	at5g62460	0.49	zinc finger (C3HC4-type RING finger) family protein | chr5:25074883-25077294 FORWARD
29.5.11.4.2	protein.degradation.ubiquitin.E3.RING	at1g02610	1.424	zinc finger (C3HC4-type RING finger) family protein | chr1:553181-555854 REVERSE
29.5.11.4.2	protein.degradation.ubiquitin.E3.RING	at3g47820	0.762	armadillo/beta-catenin repeat family protein / U-box domain-containing protein | chr3:17644428-17646160 FORWARD
29.5.11.4.2	protein.degradation.ubiquitin.E3.RING	at3g54780	0.727	zinc finger (C3HC4-type RING finger) family protein | chr3:20278954-20281551 FORWARD
29.5.11.4.2	protein.degradation.ubiquitin.E3.RING	at1g19680	0.407	protein binding / zinc ion binding | chr1:6805457-6807862 FORWARD
29.5.11.4.2	protein.degradation.ubiquitin.E3.RING	at1g13195	0.483	zinc finger (C3HC4-type RING finger) family protein | chr1:4501581-4503591 REVERSE
29.5.11.4.2	protein.degradation.ubiquitin.E3.RING	at4g35840	-0.797	zinc finger (C3HC4-type RING finger) family protein | chr4:16980961-16982365 FORWARD
29.5.11.4.2	protein.degradation.ubiquitin.E3.RING	at3g13430	0.49	zinc finger (C3HC4-type RING finger) family protein | chr3:4367281-4368820 FORWARD
29.5.11.4.2	protein.degradation.ubiquitin.E3.RING	at2g22010	0.923	Symbols: RKP | RKP (Related to KPC1); protein binding / zinc ion binding | chr2:9363721-9369307 REVERSE
29.5.11.4.2	protein.degradation.ubiquitin.E3.RING	at1g79380	0.907	copine-related | chr1:29860491-29863316 FORWARD
29.5.11.4.2	protein.degradation.ubiquitin.E3.RING	at4g19670	0.784	zinc finger (C3HC4-type RING finger) family protein | chr4:10699238-10701452 REVERSE
29.5.11.4.2	protein.degradation.ubiquitin.E3.RING	at3g46620	1.03	zinc finger (C3HC4-type RING finger) family protein | chr3:17178697-17180067 REVERSE
29.5.11.4.2	protein.degradation.ubiquitin.E3.RING	at5g23110	0.678	zinc finger (C3HC4-type RING finger) family protein | chr5:7758307-7775671 FORWARD
29.5.11.4.2	protein.degradation.ubiquitin.E3.RING	at3g62690	-0.464	Symbols: ATL5 | ATL5 (ATL5); protein binding / zinc ion binding | chr3:23185348-23186701 REVERSE
29.5.11.4.2	protein.degradation.ubiquitin.E3.RING	at1g73760	-0.798	zinc finger (C3HC4-type RING finger) family protein | chr1:27739168-27741207 REVERSE
29.5.11.4.2	protein.degradation.ubiquitin.E3.RING	at2g18670	0.336	zinc finger (C3HC4-type RING finger) family protein | chr2:8093220-8095729 FORWARD
29.5.11.4.2	protein.degradation.ubiquitin.E3.RING	at1g72310	-0.606	Symbols: ATL3 | ATL3; protein binding / zinc ion binding | chr1:27225897-27227545 FORWARD
29.5.11.4.2	protein.degradation.ubiquitin.E3.RING	at4g39140	0.726	protein binding / zinc ion binding | chr4:18229331-18232020 REVERSE
29.5.11.4.2	protein.degradation.ubiquitin.E3.RING	at5g66070	1.034	zinc finger (C3HC4-type RING finger) family protein | chr5:26421855-26423232 FORWARD
29.5.11.4.2	protein.degradation.ubiquitin.E3.RING	at1g65040	1.209	protein binding / zinc ion binding | chr1:24159834-24163628 REVERSE
29.5.11.4.2	protein.degradation.ubiquitin.E3.RING	at5g67340	1.888	armadillo/beta-catenin repeat family protein / U-box domain-containing protein | chr5:26864556-26867602 FORWARD
29.5.11.4.2	protein.degradation.ubiquitin.E3.RING	at4g03510	0.454	Symbols: RMA1 | RMA1; protein binding / ubiquitin-protein ligase/ zinc ion binding | chr4:1557120-1559428 REVERSE
29.5.11.4.2	protein.degradation.ubiquitin.E3.RING	at2g21500	0.945	protein binding / zinc ion binding | chr2:9207669-9210231 REVERSE
29.5.11.4.2	protein.degradation.ubiquitin.E3.RING	at2g22120	-0.416	protein binding / zinc ion binding | chr2:9393823-9397022 FORWARD
29.5.11.4.2	protein.degradation.ubiquitin.E3.RING	at4g28270	1.442	zinc finger (C3HC4-type RING finger) family protein | chr4:14007539-14009019 REVERSE
29.5.11.4.2	protein.degradation.ubiquitin.E3.RING	at5g08139	0.44	zinc finger (C3HC4-type RING finger) family protein | chr5:2616345-2617881 FORWARD
29.5.11.4.2	protein.degradation.ubiquitin.E3.RING	at5g10370	0.376	helicase domain-containing protein / IBR domain-containing protein / zinc finger protein-related | chr5:3261245-3267344 FORWARD
29.5.11.4.2	protein.degradation.ubiquitin.E3.RING	at5g56340	0.631	Symbols: ATCRT1 | zinc finger (C3HC4-type RING finger) family protein | chr5:22817560-22819657 FORWARD
29.5.11.4.2	protein.degradation.ubiquitin.E3.RING	at1g14260	0.856	zinc finger (C3HC4-type RING finger) family protein | chr1:4872856-4874907 FORWARD
29.5.11.4.2	protein.degradation.ubiquitin.E3.RING	at1g08050	1.813	zinc finger (C3HC4-type RING finger) family protein | chr1:2498836-2501427 REVERSE
29.5.11.4.2	protein.degradation.ubiquitin.E3.RING	at4g11370	1.003	Symbols: RHA1A | RHA1A; protein binding / zinc ion binding | chr4:6907674-6908386 FORWARD
29.5.11.4.2	protein.degradation.ubiquitin.E3.RING	at4g26400	0.921	zinc finger (C3HC4-type RING finger) family protein | chr4:13344848-13346574 REVERSE
29.5.11.4.2	protein.degradation.ubiquitin.E3.RING	at1g66050	-0.424	Symbols: VIM2, ORTH5 | VIM2 (VARIANT IN METHYLATION 2); protein binding / ubiquitin-protein ligase/ zinc ion binding | chr1:24589487-24592747 FORWARD
29.5.11.4.2	protein.degradation.ubiquitin.E3.RING	at1g76410	0.521	Symbols: ATL8 | ATL8; protein binding / zinc ion binding | chr1:28668848-28669646 FORWARD
29.5.11.4.2	protein.degradation.ubiquitin.E3.RING	at2g45920	0.546	U-box domain-containing protein | chr2:18899084-18901303 FORWARD
29.5.11.4.2	protein.degradation.ubiquitin.E3.RING	at5g59550	1.762	zinc finger (C3HC4-type RING finger) family protein | chr5:23998259-23999793 REVERSE
29.5.11.4.2	protein.degradation.ubiquitin.E3.RING	at3g19950	0.434	zinc finger (C3HC4-type RING finger) family protein | chr3:6942769-6945224 FORWARD
29.5.11.4.2	protein.degradation.ubiquitin.E3.RING	at5g58787	0.651	zinc finger (C3HC4-type RING finger) family protein | chr5:23742450-23744604 FORWARD
29.5.11.4.2	protein.degradation.ubiquitin.E3.RING	at3g05200	1.781	Symbols: ATL6 | ATL6; protein binding / zinc ion binding | chr3:1476982-1478730 FORWARD
29.5.11.4.2	protein.degradation.ubiquitin.E3.RING	at2g04240	0.569	Symbols: XERICO | XERICO; protein binding / zinc ion binding | chr2:1461630-1462934 REVERSE
29.5.11.4.2	protein.degradation.ubiquitin.E3.RING	at3g16720	1.012	Symbols: ATL2 | ATL2; protein binding / zinc ion binding | chr3:5692738-5694127 FORWARD
29.5.11.4.2	protein.degradation.ubiquitin.E3.RING	at2g42160	0.545	zinc finger (ubiquitin-hydrolase) domain-containing protein | chr2:17574641-17577463 REVERSE
29.5.11.4.2	protein.degradation.ubiquitin.E3.RING	at5g55970	0.975	zinc finger (C3HC4-type RING finger) family protein | chr5:22667906-22669545 FORWARD
29.5.11.4.2	protein.degradation.ubiquitin.E3.RING	at1g03370	0.749	protein binding / zinc ion binding | chr1:826569-835361 FORWARD
29.5.11.4.2	protein.degradation.ubiquitin.E3.RING	at2g02960	0.476	zinc finger (C3HC4-type RING finger) family protein | chr2:862087-864359 REVERSE
29.5.11.4.2	protein.degradation.ubiquitin.E3.RING	at4g14220	0.567	Symbols: RHF1A | RHF1A (RING-H2 GROUP F1A); protein binding / ubiquitin-protein ligase/ zinc ion binding | chr4:8195881-8198562 FORWARD
29.5.11.4.2	protein.degradation.ubiquitin.E3.RING	at4g33940	0.571	zinc finger (C3HC4-type RING finger) family protein | chr4:16266023-16267786 FORWARD
29.5.11.4.2	protein.degradation.ubiquitin.E3.RING	at1g19310	0.379	zinc finger (C3HC4-type RING finger) family protein | chr1:6676234-6677673 REVERSE
29.5.11.4.2	protein.degradation.ubiquitin.E3.RING	at1g63170	-0.57	zinc finger (C3HC4-type RING finger) family protein | chr1:23425352-23427311 FORWARD
29.5.11.4.2	protein.degradation.ubiquitin.E3.RING	at1g63900	0.478	zinc finger (C3HC4-type RING finger) family protein | chr1:23716719-23719301 FORWARD
29.5.11.4.2	protein.degradation.ubiquitin.E3.RING	at2g40830	0.557	Symbols: RHC1A | RHC1A; protein binding / zinc ion binding | chr2:17042676-17044857 FORWARD
29.5.11.4.2	protein.degradation.ubiquitin.E3.RING	at3g54850	0.804	Symbols: ATPUB14, PUB14 | PUB14; ubiquitin-protein ligase | chr3:20321422-20324020 FORWARD
29.5.11.4.2	protein.degradation.ubiquitin.E3.RING	at3g46510	0.571	Symbols: PUB13, ATPUB13 | PUB13 (PLANT U-BOX 13); ubiquitin-protein ligase | chr3:17123739-17126691 REVERSE
29.5.11.4.2	protein.degradation.ubiquitin.E3.RING	at1g14200	0.893	zinc finger (C3HC4-type RING finger) family protein | chr1:4854384-4855200 REVERSE
29.5.11.4.2	protein.degradation.ubiquitin.E3.RING	at5g22000	0.445	Symbols: RHF2A | RHF2A (RING-H2 GROUP F2A); protein binding / zinc ion binding | chr5:7277322-7280255 FORWARD
29.5.11.4.2	protein.degradation.ubiquitin.E3.RING	at5g24870	0.699	zinc finger (C3HC4-type RING finger) family protein | chr5:8544785-8547789 REVERSE
29.5.11.4.2	protein.degradation.ubiquitin.E3.RING	at5g38895	0.632	zinc finger (C3HC4-type RING finger) family protein | chr5:15571503-15573526 FORWARD
29.5.11.4.2	protein.degradation.ubiquitin.E3.RING	at3g18930	0.658	zinc finger (C3HC4-type RING finger) family protein | chr3:6523379-6525543 REVERSE
29.5.11.4.2	protein.degradation.ubiquitin.E3.RING	at1g43860	-0.368	transcription factor | chr1:16622068-16624469 REVERSE
29.5.11.4.2	protein.degradation.ubiquitin.E3.RING	at1g67800	0.544	copine-related | chr1:25420780-25423403 REVERSE
29.5.11.4.2	protein.degradation.ubiquitin.E3.RING	at1g32340	0.468	Symbols: NHL8 | NHL8; protein binding / zinc ion binding | chr1:11663070-11666058 REVERSE
29.5.11.4.2	protein.degradation.ubiquitin.E3.RING	at5g48655	0.49	zinc finger (C3HC4-type RING finger) family protein | chr5:19731173-19733043 REVERSE
29.5.11.4.2	protein.degradation.ubiquitin.E3.RING	at5g27420	3.137	zinc finger (C3HC4-type RING finger) family protein | chr5:9684072-9685561 FORWARD
29.5.11.4.2	protein.degradation.ubiquitin.E3.RING	at5g65920	0.609	U-box domain-containing protein | chr5:26364015-26365998 REVERSE
29.5.11.4.3.1	protein.degradation.ubiquitin.E3.SCF.SKP	at5g59140	0.478	SKP1 family protein | chr5:23874411-23875695 REVERSE
29.5.11.4.3.1	protein.degradation.ubiquitin.E3.SCF.SKP	at5g42190	-0.25	Symbols: ASK2, SKP1B | ASK2 (ARABIDOPSIS SKP1-LIKE 2); protein binding / ubiquitin-protein ligase | chr5:16854191-16855645 REVERSE
29.5.11.4.3.2	protein.degradation.ubiquitin.E3.SCF.FBOX	at2g44130	0.351	kelch repeat-containing F-box family protein | chr2:18253610-18255054 FORWARD
29.5.11.4.3.2	protein.degradation.ubiquitin.E3.SCF.FBOX	at2g27310	1.123	F-box family protein | chr2:11683862-11684967 REVERSE
29.5.11.4.3.2	protein.degradation.ubiquitin.E3.SCF.FBOX	at2g32560	-0.784	F-box family protein | chr2:13824794-13826986 FORWARD
29.5.11.4.3.2	protein.degradation.ubiquitin.E3.SCF.FBOX	at1g67190	0.355	F-box family protein | chr1:25132574-25134431 FORWARD
29.5.11.4.3.2	protein.degradation.ubiquitin.E3.SCF.FBOX	at5g18780	1.349	F-box family protein | chr5:6264610-6266097 FORWARD
29.5.11.4.3.2	protein.degradation.ubiquitin.E3.SCF.FBOX	at3g61350	0.425	Symbols: SKIP4 | SKIP4 (SKP1 INTERACTING PARTNER 4) | chr3:22702684-22704481 FORWARD
29.5.11.4.3.2	protein.degradation.ubiquitin.E3.SCF.FBOX	at5g26960	-0.537	kelch repeat-containing F-box family protein | chr5:9484734-9486149 REVERSE
29.5.11.4.3.2	protein.degradation.ubiquitin.E3.SCF.FBOX	at2g40920	-0.653	F-box family protein | chr2:17072464-17074164 REVERSE
29.5.11.4.3.2	protein.degradation.ubiquitin.E3.SCF.FBOX	at5g51370	0.745	F-box family protein | chr5:20872763-20874249 FORWARD
29.5.11.4.3.2	protein.degradation.ubiquitin.E3.SCF.FBOX	at5g48170	-0.489	Symbols: SLY2 | SLY2 (SLEEPY2) | chr5:19532537-19533265 REVERSE
29.5.11.4.3.2	protein.degradation.ubiquitin.E3.SCF.FBOX	at2g02360	0.615	Symbols: AtPP2-B10 | AtPP2-B10 (Phloem protein 2-B10); carbohydrate binding | chr2:619406-620768 REVERSE
29.5.11.4.3.2	protein.degradation.ubiquitin.E3.SCF.FBOX	at1g68050	-0.488	Symbols: ADO3, FKF1 | FKF1 (FLAVIN-BINDING, KELCH REPEAT, F BOX 1); signal transducer/ two-component sensor/ ubiquitin-protein ligase | chr1:25508676-25510889 FORWARD
29.5.11.4.3.2	protein.degradation.ubiquitin.E3.SCF.FBOX	at5g42460	0.659	FUNCTIONS IN: molecular_function unknown; INVOLVED IN: biological_process unknown; LOCATED IN: cellular_component unknown; CONTAINS InterPro DOMAIN/s: Cyclin-like F-box (InterPro:IPR001810), F-box associated (InterPro:IPR006527), F-box associated type 1 (InterPro:IPR017451); BEST Arabidopsis thaliana protein match is: F-box family protein (TAIR:AT2G17830.1); Has 799 Blast hits to 768 proteins in …
29.5.11.4.3.2	protein.degradation.ubiquitin.E3.SCF.FBOX	at3g59150	1.14	F-box family protein | chr3:21872706-21874735 FORWARD
29.5.11.4.3.2	protein.degradation.ubiquitin.E3.SCF.FBOX	at4g19870	0.546	kelch repeat-containing F-box family protein | chr4:10782871-10784256 REVERSE
29.5.11.4.3.2	protein.degradation.ubiquitin.E3.SCF.FBOX	at4g00755	-0.512	F-box family protein | chr4:325065-327008 FORWARD
29.5.11.4.3.2	protein.degradation.ubiquitin.E3.SCF.FBOX	at2g24250	-0.534	F-box family protein | chr2:10313286-10314910 REVERSE
29.5.11.4.3.2	protein.degradation.ubiquitin.E3.SCF.FBOX	at1g78100	-0.635	F-box family protein | chr1:29387795-29389112 FORWARD
29.5.11.4.3.2	protein.degradation.ubiquitin.E3.SCF.FBOX	at3g06380	0.751	Symbols: ATTLP9, TLP9 | ATTLP9 (TUBBY-LIKE PROTEIN 9); phosphoric diester hydrolase/ protein binding / transcription factor | chr3:1936124-1938221 FORWARD
29.5.11.4.3.2	protein.degradation.ubiquitin.E3.SCF.FBOX	at5g27750	0.448	F-box family protein | chr5:9828237-9830161 FORWARD
29.5.11.4.3.2	protein.degradation.ubiquitin.E3.SCF.FBOX	at4g03190	-0.602	Symbols: GRH1, ATGRH1, AFB1 | GRH1 (GRR1-LIKE PROTEIN 1); auxin binding / protein binding / ubiquitin-protein ligase | chr4:1404887-1407139 REVERSE
29.5.11.4.3.2	protein.degradation.ubiquitin.E3.SCF.FBOX	at3g63220	0.51	kelch repeat-containing F-box family protein | chr3:23357392-23359148 REVERSE
29.5.11.4.3.2	protein.degradation.ubiquitin.E3.SCF.FBOX	at1g10110	1.444	F-box family protein | chr1:3302742-3304092 FORWARD
29.5.11.4.3.2	protein.degradation.ubiquitin.E3.SCF.FBOX	at5g25350	0.529	Symbols: EBF2 | EBF2 (EIN3-BINDING F BOX PROTEIN 2); protein binding | chr5:8794252-8797020 REVERSE
29.5.11.4.3.2	protein.degradation.ubiquitin.E3.SCF.FBOX	at1g70590	0.674	F-box family protein | chr1:26618321-26620388 FORWARD
29.5.11.4.3.2	protein.degradation.ubiquitin.E3.SCF.FBOX	at5g39450	0.716	F-box family protein | chr5:15785717-15787946 FORWARD
29.5.11.4.3.2	protein.degradation.ubiquitin.E3.SCF.FBOX	at3g07870	0.893	F-box family protein | chr3:2510783-2512394 FORWARD
29.5.11.4.3.2	protein.degradation.ubiquitin.E3.SCF.FBOX	at4g05460	0.403	F-box family protein (FBL20) | chr4:2760881-2762445 REVERSE
29.5.11.4.3.2	protein.degradation.ubiquitin.E3.SCF.FBOX	at5g27920	1.058	F-box family protein | chr5:9941905-9944778 REVERSE
29.5.11.4.5.2	protein.degradation.ubiquitin.E3.BTB/POZ Cullin3.BTB/POZ	at1g01640	0.543	speckle-type POZ protein-related | chr1:230994-232508 REVERSE
29.5.11.4.5.2	protein.degradation.ubiquitin.E3.BTB/POZ Cullin3.BTB/POZ	at4g37610	1.449	Symbols: BT5 | BT5 (BTB AND TAZ DOMAIN PROTEIN 5); protein binding / transcription regulator | chr4:17670481-17672353 REVERSE
29.5.11.4.99	protein.degradation.ubiquitin.E3.unspecified	at3g45620	1.076	transducin family protein / WD-40 repeat family protein | chr3:16745896-16748129 FORWARD
29.5.11.5	protein.degradation.ubiquitin.ubiquitin protease	at4g39910	0.634	Symbols: ATUBP3, UBP3 | ATUBP3 (ARABIDOPSIS THALIANA UBIQUITIN-SPECIFIC PROTEASE 3); ubiquitin-specific protease | chr4:18511575-18514338 REVERSE
29.5.11.5	protein.degradation.ubiquitin.ubiquitin protease	at5g10790	0.505	Symbols: UBP22 | UBP22 (UBIQUITIN-SPECIFIC PROTEASE 22); ubiquitin thiolesterase/ ubiquitin-specific protease/ zinc ion binding | chr5:3410539-3412633 FORWARD
29.5.11.5	protein.degradation.ubiquitin.ubiquitin protease	at2g22310	0.541	Symbols: ATUBP4, UBP4 | ATUBP4 (ARABIDOPSIS THALIANA UBIQUITIN-SPECIFIC PROTEASE 4); ubiquitin-specific protease | chr2:9476578-9478959 REVERSE
29.5.11.5	protein.degradation.ubiquitin.ubiquitin protease	at2g40930	0.459	Symbols: UBP5, ATUBP5, PDE323 | UBP5 (UBIQUITIN-SPECIFIC PROTEASE 5); ubiquitin-specific protease | chr2:17076312-17082433 REVERSE
29.5.11.5	protein.degradation.ubiquitin.ubiquitin protease	at4g30890	-0.744	Symbols: UBP24 | UBP24 (UBIQUITIN-SPECIFIC PROTEASE 24); ubiquitin thiolesterase/ ubiquitin-specific protease | chr4:15036096-15039263 REVERSE
29.5.11.20	protein.degradation.ubiquitin.proteasom	at3g22110	0.465	Symbols: PAC1 | PAC1; endopeptidase/ peptidase/ threonine-type endopeptidase | chr3:7792638-7794165 REVERSE
29.5.11.20	protein.degradation.ubiquitin.proteasom	at1g56450	0.414	Symbols: PBG1 | PBG1; peptidase/ threonine-type endopeptidase | chr1:21141883-21144400 FORWARD
29.5.11.20	protein.degradation.ubiquitin.proteasom	at1g77440	0.411	Symbols: PBC2 | PBC2; peptidase/ threonine-type endopeptidase | chr1:29096235-29098393 FORWARD
29.5.11.20	protein.degradation.ubiquitin.proteasom	at3g14290	0.387	Symbols: PAE2 | PAE2; endopeptidase/ peptidase/ threonine-type endopeptidase | chr3:4764149-4766586 FORWARD
29.5.11.20	protein.degradation.ubiquitin.proteasom	at5g45620	-0.481	26S proteasome regulatory subunit, putative (RPN9) | chr5:18501486-18504117 FORWARD
29.5.11.20	protein.degradation.ubiquitin.proteasom	at1g75990	-0.408	26S proteasome regulatory subunit S3, putative (RPN3) | chr1:28524493-28526776 REVERSE
29.5.11.20	protein.degradation.ubiquitin.proteasom	at4g19006	-0.385	26S proteasome regulatory subunit, putative (RPN9) | chr4:10409183-10411465 REVERSE
29.5.11.20	protein.degradation.ubiquitin.proteasom	at5g42790	0.587	Symbols: PAF1, ATPSM30 | PAF1; endopeptidase/ peptidase/ threonine-type endopeptidase | chr5:17159044-17161070 REVERSE
29.5.11.20	protein.degradation.ubiquitin.proteasom	at5g20000	-0.485	26S proteasome AAA-ATPase subunit, putative | chr5:6756633-6759750 FORWARD

## Sheet: proteolysis-pseudomonas
List of the proteolyitc enzymes differentially expressed during the P. syringae treatments.
BinCode	BinName	id	bactspecificlog2.txt	description
29.5	protein.degradation	at1g78660	1.135	Symbols: ATGGH1 | gamma-glutamyl hydrolase, putative / gamma-Glu-X carboxypeptidase, putative / conjugase, putative | chr1:29585811-29588302 FORWARD
29.5	protein.degradation	at3g54720	-1.088	Symbols: AMP1, COP2, HPT, PT | AMP1 (ALTERED MERISTEM PROGRAM 1); carboxypeptidase/ dipeptidase | chr3:20254725-20257848 REVERSE
29.5	protein.degradation	at4g17510	0.448	Symbols: UCH3 | UCH3 (UBIQUITIN C-TERMINAL HYDROLASE 3); ubiquitin thiolesterase | chr4:9766971-9768770 REVERSE
29.5	protein.degradation	at4g22150	0.716	Symbols: PUX3 | PUX3; protein binding | chr4:11731138-11732901 REVERSE
29.5	protein.degradation	at1g78680	0.957	Symbols: ATGGH2 | ATGGH2 (gamma-glutamyl hydrolase 2); omega peptidase | chr1:29593781-29596270 FORWARD
29.5	protein.degradation	at1g78670	0.684	Symbols: ATGGH3 | ATGGH3 (gamma-glutamyl hydrolase 3); catalytic/ hydrolase/ omega peptidase | chr1:29590945-29593499 FORWARD
29.5	protein.degradation	at5g20660	0.419	24 kDa vacuolar protein, putative | chr5:6986235-6991043 FORWARD
29.5	protein.degradation	at5g43580	5.525	serine-type endopeptidase inhibitor | chr5:17507883-17508642 REVERSE
29.5	protein.degradation	at4g33090	0.676	Symbols: APM1, ATAPM1 | APM1 (AMINOPEPTIDASE M1); aminopeptidase | chr4:15965741-15970456 REVERSE
29.5	protein.degradation	at1g75460	-1.02	ATP-dependent protease La (LON) domain-containing protein | chr1:28327886-28329764 FORWARD
29.5	protein.degradation	at4g09560	0.769	peptidase/ protein binding / zinc ion binding | chr4:6041342-6043840 REVERSE
29.5	protein.degradation	at1g67700	-0.821	unknown protein | chr1:25374230-25376034 FORWARD
29.5.1	protein.degradation.subtilases	at5g59130	-1.96	subtilase family protein | chr5:23870147-23873691 REVERSE
29.5.1	protein.degradation.subtilases	at2g04160	1.688	Symbols: AIR3 | AIR3; serine-type endopeptidase | chr2:1401268-1407745 REVERSE
29.5.2	protein.degradation.autophagy	at5g17290	0.63	Symbols: ATG5, APG5, ATATG5 | APG5 (AUTOPHAGY 5); transporter | chr5:5686945-5689900 REVERSE
29.5.2	protein.degradation.autophagy	at4g21980	0.967	Symbols: APG8A, ATG8A | APG8A (AUTOPHAGY 8A); APG8 activating enzyme/ APG8-specific protease/ Atg8 ligase | chr4:11655613-11657034 FORWARD
29.5.2	protein.degradation.autophagy	at4g16520	0.617	Symbols: ATG8F | ATG8F (autophagy 8f); microtubule binding | chr4:9306663-9308462 REVERSE
29.5.2	protein.degradation.autophagy	at3g15580	0.47	Symbols: ATG8I, APG8H | APG8H (AUTOPHAGY 8H); APG8 activating enzyme/ APG8-specific protease/ Atg8 ligase/ microtubule binding | chr3:5273895-5275095 REVERSE
29.5.3	protein.degradation.cysteine protease	at1g09850	0.698	Symbols: XBCP3 | XBCP3 (xylem bark cysteine peptidase 3); cysteine-type endopeptidase/ cysteine-type peptidase | chr1:3201799-3204150 FORWARD
29.5.3	protein.degradation.cysteine protease	at5g47550	-0.745	cysteine protease inhibitor, putative / cystatin, putative | chr5:19286450-19286995 REVERSE
29.5.3	protein.degradation.cysteine protease	at4g16500	0.435	cysteine protease inhibitor family protein / cystatin family protein | chr4:9301388-9302022 REVERSE
29.5.3	protein.degradation.cysteine protease	at4g16190	0.914	cysteine proteinase, putative | chr4:9171467-9173105 FORWARD
29.5.3	protein.degradation.cysteine protease	at2g27395	-1.444	pseudogene of cysteine protease-related | chr2:11721051-11721324 REVERSE
29.5.3	protein.degradation.cysteine protease	at5g45890	2.407	Symbols: SAG12 | SAG12 (SENESCENCE-ASSOCIATED GENE 12); cysteine-type peptidase | chr5:18613259-18614930 FORWARD
29.5.3	protein.degradation.cysteine protease	at2g27420	-1.674	cysteine proteinase, putative | chr2:11726144-11727614 REVERSE
29.5.3	protein.degradation.cysteine protease	at3g12490	1.132	Symbols: ATCYSB | cysteine protease inhibitor, putative / cystatin, putative | chr3:3960401-3961915 REVERSE
29.5.3	protein.degradation.cysteine protease	at4g11320	2.85	cysteine proteinase, putative | chr4:6887254-6889059 FORWARD
29.5.5	protein.degradation.serine protease	at1g12750	-0.912	Symbols: ATRBL6 | ATRBL6 (ARABIDOPSIS RHOMBOID-LIKE PROTEIN 6) | chr1:4344985-4348327 REVERSE
29.5.5	protein.degradation.serine protease	at4g17740	-0.648	C-terminal processing protease, putative | chr4:9866977-9869752 REVERSE
29.5.5	protein.degradation.serine protease	at3g10410	0.867	Symbols: scpl49 | scpl49 (serine carboxypeptidase-like 49); serine-type carboxypeptidase | chr3:3235291-3238113 REVERSE
29.5.5	protein.degradation.serine protease	at5g50920	0.628	Symbols: CLPC, ATHSP93-V, HSP93-V, DCA1, CLPC1 | CLPC1; ATP binding / ATP-dependent peptidase/ ATPase | chr5:20715469-20720374 REVERSE
29.5.5	protein.degradation.serine protease	at1g11750	-0.492	Symbols: CLPP6, NCLPP1, NCLPP6 | CLPP6; serine-type endopeptidase | chr1:3967476-3969854 FORWARD
29.5.5	protein.degradation.serine protease	at5g39830	-0.661	Symbols: DEGP8, DEG8 | DEG8; peptidase/ serine-type peptidase | chr5:15942797-15945827 FORWARD
29.5.5	protein.degradation.serine protease	at5g43570	3.584	serine-type endopeptidase inhibitor | chr5:17506401-17507600 FORWARD
29.5.7	protein.degradation.metalloprotease	at5g53170	-0.504	Symbols: FTSH11 | FTSH11 (FtsH protease 11); ATP-dependent peptidase/ ATPase/ metallopeptidase | chr5:21562747-21568012 REVERSE
29.5.7	protein.degradation.metalloprotease	at2g20725	-0.57	CAAX amino terminal protease family protein | chr2:8933571-8935496 REVERSE
29.5.7	protein.degradation.metalloprotease	at2g32480	-0.511	membrane-associated zinc metalloprotease, putative | chr2:13788517-13790073 REVERSE
29.5.7	protein.degradation.metalloprotease	at1g50250	-0.531	Symbols: FTSH1 | FTSH1 (FtsH protease 1); ATP-dependent peptidase/ ATPase/ metallopeptidase | chr1:18614209-18617063 REVERSE
29.5.9	protein.degradation.AAA type	at4g04910	0.574	Symbols: NSF | NSF (N-ethylmaleimide sensitive factor); ATP binding / binding / nucleoside-triphosphatase/ nucleotide binding | chr4:2489417-2495766 REVERSE
29.5.11	protein.degradation.ubiquitin	at4g38630	0.628	Symbols: RPN10, MCB1, ATMCB1, MBP1 | RPN10 (REGULATORY PARTICLE NON-ATPASE 10); peptide receptor | chr4:18057130-18059540 REVERSE
29.5.11	protein.degradation.ubiquitin	at1g31340	-0.533	Symbols: RUB1, NEDD8, ATRUB1 | RUB1 (RELATED TO UBIQUITIN 1); protein binding | chr1:11217845-11219458 REVERSE
29.5.11	protein.degradation.ubiquitin	at2g29070	0.614	ubiquitin fusion degradation UFD1 family protein | chr2:12487274-12489518 FORWARD
29.5.11.1	protein.degradation.ubiquitin.ubiquitin	at5g57860	0.546	ubiquitin family protein | chr5:23437656-23439311 FORWARD
29.5.11.1	protein.degradation.ubiquitin.ubiquitin	at5g37640	1.128	Symbols: UBQ9 | UBQ9; protein binding | chr5:14952782-14953750 REVERSE
29.5.11.1	protein.degradation.ubiquitin.ubiquitin	at5g03240	1.686	Symbols: UBQ3 | UBQ3 (POLYUBIQUITIN 3); protein binding | chr5:771752-773363 REVERSE
29.5.11.3	protein.degradation.ubiquitin.E2	at5g41700	-0.657	Symbols: UBC8, ATUBC8 | UBC8 (UBIQUITIN CONJUGATING ENZYME 8); protein binding / ubiquitin-protein ligase | chr5:16675842-16677509 FORWARD
29.5.11.3	protein.degradation.ubiquitin.E2	at2g02760	0.586	Symbols: ATUBC2, UBC2 | ATUBC2 (UBIQUITING-CONJUGATING ENZYME 2); ubiquitin-protein ligase | chr2:773684-775371 FORWARD
29.5.11.3	protein.degradation.ubiquitin.E2	at1g64230	0.493	Symbols: UBC28 | ubiquitin-conjugating enzyme, putative | chr1:23833563-23835536 FORWARD
29.5.11.4.2	protein.degradation.ubiquitin.E3.RING	at2g22690	0.548	protein binding / zinc ion binding | chr2:9649690-9651439 REVERSE
29.5.11.4.2	protein.degradation.ubiquitin.E3.RING	at5g20885	-0.537	zinc finger (C3HC4-type RING finger) family protein | chr5:7083965-7084734 REVERSE
29.5.11.4.2	protein.degradation.ubiquitin.E3.RING	at5g54630	-0.905	zinc finger protein-related | chr5:22192499-22194308 REVERSE
29.5.11.4.2	protein.degradation.ubiquitin.E3.RING	at1g24580	-0.665	zinc finger (C3HC4-type RING finger) family protein | chr1:8710180-8710824 FORWARD
29.5.11.4.2	protein.degradation.ubiquitin.E3.RING	at3g09770	0.545	zinc finger (C3HC4-type RING finger) family protein | chr3:2996269-2998190 REVERSE
29.5.11.4.2	protein.degradation.ubiquitin.E3.RING	at2g47560	0.556	zinc finger (C3HC4-type RING finger) family protein | chr2:19511717-19512728 REVERSE
29.5.11.4.2	protein.degradation.ubiquitin.E3.RING	at3g19910	0.995	zinc finger (C3HC4-type RING finger) family protein | chr3:6926308-6929567 FORWARD
29.5.11.4.2	protein.degradation.ubiquitin.E3.RING	at2g46160	-0.504	zinc finger (C3HC4-type RING finger) family protein | chr2:18963083-18963885 FORWARD
29.5.11.4.2	protein.degradation.ubiquitin.E3.RING	at5g14420	0.587	Symbols: RGLG2 | RGLG2 (RING domain Ligase2); ubiquitin-protein ligase | chr5:4648111-4650698 REVERSE
29.5.11.4.2	protein.degradation.ubiquitin.E3.RING	at3g60300	1.302	RWD domain-containing protein | chr3:22285311-22287479 FORWARD
29.5.11.4.2	protein.degradation.ubiquitin.E3.RING	at1g33480	-1.143	protein binding / zinc ion binding | chr1:12148602-12150263 REVERSE
29.5.11.4.2	protein.degradation.ubiquitin.E3.RING	at2g44580	1.859	protein binding / zinc ion binding | chr2:18401878-18403416 REVERSE
29.5.11.4.2	protein.degradation.ubiquitin.E3.RING	at2g42360	0.988	zinc finger (C3HC4-type RING finger) family protein | chr2:17640798-17641790 FORWARD
29.5.11.4.2	protein.degradation.ubiquitin.E3.RING	at1g79110	0.468	protein binding / zinc ion binding | chr1:29759158-29760691 FORWARD
29.5.11.4.2	protein.degradation.ubiquitin.E3.RING	at1g60610	1.194	protein binding / zinc ion binding | chr1:22327912-22330276 REVERSE
29.5.11.4.2	protein.degradation.ubiquitin.E3.RING	at4g25230	0.597	Symbols: RIN2 | RIN2 (RPM1 INTERACTING PROTEIN 2); protein binding / ubiquitin-protein ligase/ zinc ion binding | chr4:12924059-12929156 FORWARD
29.5.11.4.2	protein.degradation.ubiquitin.E3.RING	at1g15100	0.587	Symbols: RHA2A | RHA2A; protein binding / ubiquitin-protein ligase/ zinc ion binding | chr1:5193426-5194203 REVERSE
29.5.11.4.2	protein.degradation.ubiquitin.E3.RING	at3g18773	-0.969	zinc finger (C3HC4-type RING finger) family protein | chr3:6465825-6467175 FORWARD
29.5.11.4.2	protein.degradation.ubiquitin.E3.RING	at5g47610	-1.127	zinc finger (C3HC4-type RING finger) family protein | chr5:19301188-19301913 REVERSE
29.5.11.4.2	protein.degradation.ubiquitin.E3.RING	at3g12920	0.53	protein binding / zinc ion binding | chr3:4121883-4123508 REVERSE
29.5.11.4.2	protein.degradation.ubiquitin.E3.RING	at1g77770	0.809	protein binding / zinc ion binding | chr1:29246074-29248022 REVERSE
29.5.11.4.2	protein.degradation.ubiquitin.E3.RING	at1g74370	-0.706	zinc finger (C3HC4-type RING finger) family protein | chr1:27958086-27959366 REVERSE
29.5.11.4.3.2	protein.degradation.ubiquitin.E3.SCF.FBOX	at4g08980	0.424	F-box family protein (FBW2) | chr4:5758363-5760558 FORWARD
29.5.11.4.3.2	protein.degradation.ubiquitin.E3.SCF.FBOX	at1g67480	-0.483	kelch repeat-containing F-box family protein | chr1:25276295-25278718 FORWARD
29.5.11.4.3.2	protein.degradation.ubiquitin.E3.SCF.FBOX	at1g78280	0.442	transferase, transferring glycosyl groups | chr1:29452555-29457373 FORWARD
29.5.11.4.3.2	protein.degradation.ubiquitin.E3.SCF.FBOX	at1g47300	2.659	F-box family protein | chr1:17339561-17340972 REVERSE
29.5.11.4.3.2	protein.degradation.ubiquitin.E3.SCF.FBOX	at1g55000	0.776	peptidoglycan-binding LysM domain-containing protein | chr1:20514634-20516468 FORWARD
29.5.11.4.3.2	protein.degradation.ubiquitin.E3.SCF.FBOX	at2g26030	0.509	F-box family protein | chr2:11091334-11093156 REVERSE
29.5.11.4.3.2	protein.degradation.ubiquitin.E3.SCF.FBOX	at1g77000	1.532	Symbols: ATSKP2;2, SKP2B | SKP2B; ubiquitin-protein ligase | chr1:28940750-28942596 FORWARD
29.5.11.4.3.2	protein.degradation.ubiquitin.E3.SCF.FBOX	at1g21410	1.168	Symbols: SKP2A | SKP2A | chr1:7497141-7499579 FORWARD
29.5.11.4.3.2	protein.degradation.ubiquitin.E3.SCF.FBOX	at3g59210	0.536	F-box family protein | chr3:21889571-21891776 FORWARD
29.5.11.4.3.2	protein.degradation.ubiquitin.E3.SCF.FBOX	at1g53320	0.655	Symbols: AtTLP7 | AtTLP7 (TUBBY LIKE PROTEIN 7); phosphoric diester hydrolase/ transcription factor | chr1:19891014-19893504 REVERSE
29.5.11.4.3.2	protein.degradation.ubiquitin.E3.SCF.FBOX	at1g26930	2.14	kelch repeat-containing F-box family protein | chr1:9336057-9337786 REVERSE
29.5.11.4.3.4	protein.degradation.ubiquitin.E3.SCF.RBX	at5g20570	0.42	Symbols: ROC1, RBX1, HRT1, ATRBX1 | RBX1 (RING-BOX 1); protein binding | chr5:6956660-6958311 REVERSE
29.5.11.4.5.2	protein.degradation.ubiquitin.E3.BTB/POZ Cullin3.BTB/POZ	at3g06190	0.467	Symbols: ATBPM2, BPM2 | BPM2 (BTB-POZ AND MATH DOMAIN 2); protein binding | chr3:1874291-1876913 REVERSE
29.5.11.20	protein.degradation.ubiquitin.proteasom	at1g53780	0.647	ATP binding / ATPase/ hydrolase/ nucleoside-triphosphatase/ nucleotide binding / peptidyl-prolyl cis-trans isomerase | chr1:20073996-20077713 REVERSE
29.5.11.20	protein.degradation.ubiquitin.proteasom	at5g40580	0.471	Symbols: PBB2 | PBB2; endopeptidase/ peptidase/ threonine-type endopeptidase | chr5:16248286-16250756 REVERSE
29.5.11.20	protein.degradation.ubiquitin.proteasom	at5g35590	0.482	Symbols: PAA1 | PAA1 (PROTEASOME ALPHA SUBUNIT A 1); endopeptidase/ peptidase/ threonine-type endopeptidase | chr5:13765138-13767823 REVERSE
29.5.11.20	protein.degradation.ubiquitin.proteasom	at1g09100	0.567	Symbols: RPT5B | RPT5B (26S proteasome AAA-ATPase subunit RPT5B); ATPase/ calmodulin binding | chr1:2936528-2939326 REVERSE
29.5.11.20	protein.degradation.ubiquitin.proteasom	at5g58290	0.664	Symbols: RPT3 | RPT3 (REGULATORY PARTICLE TRIPLE-A ATPASE 3); ATPase | chr5:23569062-23571340 FORWARD
29.5.11.20	protein.degradation.ubiquitin.proteasom	at1g13060	0.442	Symbols: PBE1 | PBE1; endopeptidase/ peptidase/ threonine-type endopeptidase | chr1:4452271-4454874 FORWARD
