# Supplementary material for: Molecular Signatures in Arabidopsis thaliana in Response to Insect Attack and Bacterial Infection
Source: PLoS One. 2013 Mar 25;8(3):e58987. doi: 10.1371/journal.pone.0058987 (PMC3607608; doi:10.1371/journal.pone.0058987)
Supplement: File S10 — List of genes involved in cell wall precursor synthesis that were differentially regulated during the aphid and P. syringae treatments. (XLS) [file pone.0058987.s010.xls]

## Sheet: cellwall-aphid
List of genes involved in cell wall precursor synthesis :Aphid
BinCode	BinName	id	aphidspecifilog2.txt	description
10.1	cell wall.precursor synthesis	at1g31070	-0.575	UDP-N-acetylglucosamine pyrophosphorylase-related | chr1:11084859-11088563 FORWARD
10.1.2	cell wall.precursor synthesis.UGE	at4g23920	-0.537	Symbols: UGE2 | UGE2 (UDP-D-glucose/UDP-D-galactose 4-epimerase 2); UDP-glucose 4-epimerase/ protein dimerization | chr4:12431277-12433864 FORWARD
10.1.5	cell wall.precursor synthesis.UXS	at2g47650	0.556	Symbols: UXS4 | UXS4 (UDP-XYLOSE SYNTHASE 4); UDP-glucuronate decarboxylase/ catalytic | chr2:19538610-19541457 REVERSE
10.1.5	cell wall.precursor synthesis.UXS	at5g59290	-0.807	Symbols: UXS3, ATUXS3 | UXS3 (UDP-GLUCURONIC ACID DECARBOXYLASE 3); UDP-glucuronate decarboxylase/ catalytic | chr5:23915530-23917998 REVERSE
10.1.7	cell wall.precursor synthesis.GMD	at3g51160	0.358	Symbols: MUR1, MUR_1, GMD2 | MUR1 (MURUS 1); GDP-mannose 4,6-dehydratase | chr3:19007010-19008427 REVERSE
10.1.8	cell wall.precursor synthesis.GER	at1g17890	0.431	Symbols: GER2 | GER2; binding / catalytic/ coenzyme binding | chr1:6154268-6155752 REVERSE
10.1.8	cell wall.precursor synthesis.GER	at1g73250	0.491	Symbols: ATFX, GER1 | GER1 (GDP-4-KETO-6-DEOXYMANNOSE-3,5-EPIMERASE-4-REDUCTASE 1); GDP-L-fucose synthase | chr1:27545006-27546435 REVERSE
10.1.9	cell wall.precursor synthesis.MUR4	at4g20460	0.738	NAD-dependent epimerase/dehydratase family protein | chr4:11029736-11032649 REVERSE
10.1.11	cell wall.precursor synthesis.UER	at1g63000	-0.533	Symbols: NRS/ER, UER1 | NRS/ER (NUCLEOTIDE-RHAMNOSE SYNTHASE/EPIMERASE-REDUCTASE); UDP-4-keto-6-deoxy-glucose-3,5-epimerase/ UDP-4-keto-rhamnose-4-keto-reductase/ dTDP-4-dehydrorhamnose 3,5-epimerase/ dTDP-4-dehydrorhamnose reductase | chr1:23342393-23344113 FORWARD
10.1.12.1	cell wall.precursor synthesis.KDO pathway.arabinose-5-phosphate isomerase	at3g54690	-0.77	sugar isomerase (SIS) domain-containing protein / CBS domain-containing protein | chr3:20246539-20248140 FORWARD
10.1.12.2	cell wall.precursor synthesis.KDO pathway.KDO-8-Phosphate Synthase	at1g79500	-0.849	2-dehydro-3-deoxyphosphooctonate aldolase / phospho-2-dehydro-3-deoxyoctonate aldolase / 3-deoxy-D-manno-octulosonic acid 8-phosphate synthetase (KDSA) | chr1:29903420-29909437 FORWARD
10.1.12.4	cell wall.precursor synthesis.KDO pathway.CMP-KDO Synthetase	at1g53000	-0.455	cytidylyltransferase family | chr1:19745046-19747245 REVERSE
10.2.1	cell wall.cellulose synthesis.cellulose synthase	at4g18780	-0.99	Symbols: CESA8, IRX1, ATCESA8, LEW2 | IRX1 (IRREGULAR XYLEM 1); cellulose synthase/ transferase, transferring glycosyl groups | chr4:10312624-10316790 REVERSE
10.2.1	cell wall.cellulose synthesis.cellulose synthase	at1g55850	1.066	Symbols: ATCSLE1, CSLE1 | ATCSLE1; cellulose synthase/ transferase, transferring glycosyl groups | chr1:20876699-20879482 FORWARD
10.2.2	cell wall.cellulose synthesis.COBRA	at5g60920	-0.502	Symbols: COB | COB (COBRA) | chr5:24511196-24514129 REVERSE
10.3	cell wall.hemicellulose synthesis	at2g15390	1.331	Symbols: FUT4, atfut4 | FUT4; fucosyltransferase/ transferase, transferring glycosyl groups | chr2:6709260-6711156 REVERSE
10.3	cell wall.hemicellulose synthesis	at1g14070	1.301	Symbols: FUT7 | FUT7; fucosyltransferase/ transferase, transferring glycosyl groups | chr1:4818548-4820150 FORWARD
10.4	cell wall.pectin synthesis	at3g25140	-0.474	Symbols: GAUT8, QUA1 | QUA1 (QUASIMODO 1); polygalacturonate 4-alpha-galacturonosyltransferase/ transferase, transferring glycosyl groups / transferase, transferring hexosyl groups | chr3:9154711-9156845 FORWARD
10.4.3.6	cell wall.pectin synthesis.rhamnogalacturonan II.Xylose Transferase with Fucose Acceptor	at1g56550	0.956	UDP-xylosyltransferase | chr1:21185662-21188369 REVERSE
10.5.1	cell wall.cell wall proteins.AGPs	at5g03170	-0.989	Symbols: FLA11 | FLA11 | chr5:752750-753657 REVERSE
10.5.1	cell wall.cell wall proteins.AGPs	at3g11700	-0.396	Symbols: FLA18 | FLA18 (FASCICLIN-LIKE ARABINOGALACTAN PROTEIN 18 PRECURSOR) | chr3:3698839-3701493 FORWARD
10.5.1	cell wall.cell wall proteins.AGPs	at1g35230	3.256	Symbols: AGP5 | AGP5 (ARABINOGALACTAN-PROTEIN 5) | chr1:12917149-12917763 FORWARD
10.5.1	cell wall.cell wall proteins.AGPs	at1g03870	-1.126	Symbols: FLA9 | FLA9 (FASCICLIN-LIKE ARABINOOGALACTAN 9) | chr1:982506-983540 REVERSE
10.5.1	cell wall.cell wall proteins.AGPs	at2g47930	-1.377	Symbols: AGP26, ATAGP26 | AGP26 (ARABINOGALACTAN PROTEIN 26) | chr2:19616975-19617681 REVERSE
10.5.1	cell wall.cell wall proteins.AGPs	at4g37450	-0.732	Symbols: AGP18, ATAGP18 | AGP18 (ARABINOGALACTAN PROTEIN 18) | chr4:17605758-17606755 REVERSE
10.5.1	cell wall.cell wall proteins.AGPs	at1g55330	-1.16	Symbols: AGP21, ATAGP21 | AGP21 | chr1:20648465-20648891 REVERSE
10.5.1	cell wall.cell wall proteins.AGPs	at1g68725	-0.456	Symbols: AGP19, ATAGP19 | AGP19 (ARABINOGALACTAN-PROTEIN 19) | chr1:25809298-25810130 FORWARD
10.5.1	cell wall.cell wall proteins.AGPs	at5g65390	-0.777	Symbols: AGP7 | AGP7 | chr5:26128584-26129338 REVERSE
10.5.1	cell wall.cell wall proteins.AGPs	at3g60900	-0.713	Symbols: FLA10 | FLA10 | chr3:22499360-22501239 REVERSE
10.5.1	cell wall.cell wall proteins.AGPs	at2g14890	-0.396	Symbols: AGP9 | AGP9 (ARABINOGALACTAN PROTEIN 9) | chr2:6399621-6401059 FORWARD
10.5.1	cell wall.cell wall proteins.AGPs	at5g06390	-0.701	Symbols: FLA17 | FLA17 (FASCICLIN-LIKE ARABINOGALACTAN PROTEIN 17 PRECURSOR) | chr5:1952851-1955788 FORWARD
10.5.1	cell wall.cell wall proteins.AGPs	at5g53250	-0.853	Symbols: AGP22, ATAGP22 | AGP22 (ARABINOGALACTAN PROTEIN 22) | chr5:21603620-21604231 FORWARD
10.5.1	cell wall.cell wall proteins.AGPs	at5g60490	-0.773	Symbols: FLA12 | FLA12 | chr5:24325727-24326702 REVERSE
10.5.1	cell wall.cell wall proteins.AGPs	at3g13520	-0.983	Symbols: AGP12, ATAGP12 | AGP12 (ARABINOGALACTAN PROTEIN 12) | chr3:4408925-4409440 FORWARD
10.5.1	cell wall.cell wall proteins.AGPs	at5g10430	-0.867	Symbols: AGP4, ATAGP4 | AGP4 (ARABINOGALACTAN PROTEIN 4) | chr5:3277532-3278313 REVERSE
10.5.3	cell wall.cell wall proteins.LRR	at2g19780	-0.818	leucine-rich repeat family protein / extensin family protein | chr2:8522678-8525093 REVERSE
10.5.3	cell wall.cell wall proteins.LRR	at4g18670	-0.45	protein binding / structural constituent of cell wall | chr4:10275462-10278491 REVERSE
10.5.4	cell wall.cell wall proteins.HRGP	at3g54590	0.905	Symbols: ATHRGP1 | ATHRGP1 (HYDROXYPROLINE-RICH GLYCOPROTEIN); structural constituent of cell wall | chr3:20206160-20208472 FORWARD
10.5.4	cell wall.cell wall proteins.HRGP	at2g43150	0.778	proline-rich extensin-like family protein | chr2:17945893-17947022 FORWARD
10.6.1	cell wall.degradation.cellulases and beta -1,4-glucanases	at3g62740	-0.573	Symbols: BGLU7 | BGLU7 (BETA GLUCOSIDASE 7); catalytic/ cation binding / hydrolase, hydrolyzing O-glycosyl compounds | chr3:23211416-23213888 FORWARD
10.6.1	cell wall.degradation.cellulases and beta -1,4-glucanases	at1g19940	-0.802	Symbols: AtGH9B5 | AtGH9B5 (Arabidopsis thaliana Glycosyl Hydrolase 9B5); catalytic/ hydrolase, hydrolyzing O-glycosyl compounds | chr1:6918191-6920377 REVERSE
10.6.1	cell wall.degradation.cellulases and beta -1,4-glucanases	at5g20950	0.531	glycosyl hydrolase family 3 protein | chr5:7107376-7111349 REVERSE
10.6.1	cell wall.degradation.cellulases and beta -1,4-glucanases	at2g32990	-1.086	Symbols: AtGH9B8 | AtGH9B8 (Arabidopsis thaliana glycosyl hydrolase 9B8); catalytic/ hydrolase, hydrolyzing O-glycosyl compounds | chr2:14003250-14006017 FORWARD
10.6.2	cell wall.degradation.mannan-xylose-arabinose-fucose	at5g49360	1.03	Symbols: BXL1, ATBXL1 | BXL1 (BETA-XYLOSIDASE 1); hydrolase, hydrolyzing O-glycosyl compounds | chr5:20011879-20016742 REVERSE
10.6.2	cell wall.degradation.mannan-xylose-arabinose-fucose	at1g67830	-0.861	Symbols: ATFXG1 | ATFXG1 (alpha-fucosidase 1); alpha-L-fucosidase/ carboxylesterase | chr1:25431586-25432990 REVERSE
10.6.2	cell wall.degradation.mannan-xylose-arabinose-fucose	at2g28100	-0.843	Symbols: ATFUC1 | ATFUC1 (alpha-L-fucosidase 1); alpha-L-fucosidase | chr2:11974663-11976600 FORWARD
10.6.2	cell wall.degradation.mannan-xylose-arabinose-fucose	at1g78060	-0.83	glycosyl hydrolase family 3 protein | chr1:29349679-29352924 REVERSE
10.6.3	cell wall.degradation.pectate lyases and polygalacturonases	at3g53190	-0.711	pectate lyase family protein | chr3:19713928-19717595 FORWARD
10.6.3	cell wall.degradation.pectate lyases and polygalacturonases	at1g23460	-0.497	polygalacturonase | chr1:8327312-8329622 FORWARD
10.6.3	cell wall.degradation.pectate lyases and polygalacturonases	at3g54920	-0.541	Symbols: PMR6 | PMR6 (powdery mildew resistant 6); lyase/ pectate lyase | chr3:20345082-20348582 FORWARD
10.6.3	cell wall.degradation.pectate lyases and polygalacturonases	at1g19170	0.338	glycoside hydrolase family 28 protein / polygalacturonase (pectinase) family protein | chr1:6616643-6618986 FORWARD
10.6.3	cell wall.degradation.pectate lyases and polygalacturonases	at1g10640	-0.806	polygalacturonase | chr1:3515365-3517888 REVERSE
10.6.3	cell wall.degradation.pectate lyases and polygalacturonases	at3g12145	-0.92	Symbols: FLR1, FLOR1 | FLR1; enzyme inhibitor/ transcription factor binding | chr3:3874499-3876237 REVERSE
10.6.3	cell wall.degradation.pectate lyases and polygalacturonases	at3g16850	-0.663	glycoside hydrolase family 28 protein / polygalacturonase (pectinase) family protein | chr3:5748570-5751297 FORWARD
10.6.3	cell wall.degradation.pectate lyases and polygalacturonases	at4g23500	-0.714	glycoside hydrolase family 28 protein / polygalacturonase (pectinase) family protein | chr4:12264590-12267196 FORWARD
10.6.3	cell wall.degradation.pectate lyases and polygalacturonases	at1g70370	-0.709	BURP domain-containing protein / polygalacturonase, putative | chr1:26512722-26515188 REVERSE
10.6.3	cell wall.degradation.pectate lyases and polygalacturonases	at3g06770	-0.747	glycoside hydrolase family 28 protein / polygalacturonase (pectinase) family protein | chr3:2134800-2137228 REVERSE
10.6.3	cell wall.degradation.pectate lyases and polygalacturonases	at3g62110	-0.507	glycoside hydrolase family 28 protein / polygalacturonase (pectinase) family protein | chr3:22997031-23000041 REVERSE
10.7	cell wall.modification	at2g20750	-0.71	Symbols: ATEXPB1, EXPB1, ATHEXP BETA 1.5 | ATEXPB1 (ARABIDOPSIS THALIANA EXPANSIN B1) | chr2:8941119-8942689 FORWARD
10.7	cell wall.modification	at1g11545	-1.396	xyloglucan:xyloglucosyl transferase, putative / xyloglucan endotransglycosylase, putative / endo-xyloglucan transferase, putative | chr1:3878550-3880361 REVERSE
10.7	cell wall.modification	at1g14720	-0.514	Symbols: XTR2, EXGT-A2, ATXTH28 | XTR2 (XYLOGLUCAN ENDOTRANSGLYCOSYLASE RELATED 2); hydrolase, acting on glycosyl bonds / xyloglucan:xyloglucosyl transferase | chr1:5066636-5068645 REVERSE
10.7	cell wall.modification	at2g06850	-0.807	Symbols: EXGT-A1, EXT | EXGT-A1 (ENDOXYLOGLUCAN TRANSFERASE); hydrolase, acting on glycosyl bonds / xyloglucan:xyloglucosyl transferase | chr2:2763526-2765720 FORWARD
10.7	cell wall.modification	at4g17030	-0.464	Symbols: ATEXLB1, EXPR, AT-EXPR, ATEXPR1, ATHEXP BETA 3.1 | ATEXLB1 (ARABIDOPSIS THALIANA EXPANSIN-LIKE B1) | chr4:9581586-9583290 REVERSE
10.7	cell wall.modification	at1g32170	0.877	Symbols: XTR4, XTH30 | XTR4 (XYLOGLUCAN ENDOTRANSGLYCOSYLASE 4); hydrolase, acting on glycosyl bonds / hydrolase, hydrolyzing O-glycosyl compounds / xyloglucan:xyloglucosyl transferase | chr1:11575320-11577927 FORWARD
10.7	cell wall.modification	at5g57560	1.852	Symbols: TCH4, XTH22 | TCH4 (Touch 4); hydrolase, acting on glycosyl bonds / xyloglucan:xyloglucosyl transferase | chr5:23307130-23308282 REVERSE
10.7	cell wall.modification	at4g03210	-1.099	Symbols: XTH9 | XTH9 (XYLOGLUCAN ENDOTRANSGLUCOSYLASE/HYDROLASE 9); hydrolase, acting on glycosyl bonds / xyloglucan:xyloglucosyl transferase | chr4:1415949-1417327 FORWARD
10.7	cell wall.modification	at4g38400	-1.505	Symbols: ATEXLA2, EXPL2, ATEXPL2, ATHEXP BETA 2.2 | ATEXLA2 (ARABIDOPSIS THALIANA EXPANSIN-LIKE A2) | chr4:17978443-17979740 REVERSE
10.7	cell wall.modification	at3g55500	0.53	Symbols: ATEXPA16, EXP16, ATEXP16, ATHEXP ALPHA 1.7 | ATEXPA16 (ARABIDOPSIS THALIANA EXPANSIN A16) | chr3:20574831-20576182 REVERSE
10.7	cell wall.modification	at3g23730	-1.013	xyloglucan:xyloglucosyl transferase, putative / xyloglucan endotransglycosylase, putative / endo-xyloglucan transferase, putative | chr3:8550110-8551335 FORWARD
10.8.1	cell wall.pectin*esterases.PME	at3g49220	-0.46	pectinesterase family protein | chr3:18249776-18253839 FORWARD
10.8.1	cell wall.pectin*esterases.PME	at3g14310	0.378	Symbols: ATPME3 | ATPME3; pectinesterase | chr3:4771902-4775119 REVERSE
10.8.1	cell wall.pectin*esterases.PME	at2g26440	1.302	pectinesterase family protein | chr2:11247383-11249493 FORWARD
10.8.2	cell wall.pectin*esterases.acetyl esterase	at3g05910	-0.826	pectinacetylesterase, putative | chr3:1764294-1767575 REVERSE
10.8.2	cell wall.pectin*esterases.acetyl esterase	at4g19410	0.43	pectinacetylesterase, putative | chr4:10582021-10585758 REVERSE
10.8.2	cell wall.pectin*esterases.acetyl esterase	at5g26670	-0.89	pectinacetylesterase, putative | chr5:9318282-9320987 FORWARD
10.8.2	cell wall.pectin*esterases.acetyl esterase	at4g19420	1.402	pectinacetylesterase family protein | chr4:10587166-10590588 REVERSE

## Sheet: cellwall-pseudo
List of genes involved in cell wall precursor synthesis :Pseudomonas
BinCode	BinName	id	bactspecificlog2.txt	description
10.1.2	cell wall.precursor synthesis.UGE	at1g63180	1.449	Symbols: UGE3 | UGE3 (UDP-D-glucose/UDP-D-galactose 4-epimerase 3); UDP-glucose 4-epimerase/ protein dimerization | chr1:23427409-23429603 REVERSE
10.1.10	cell wall.precursor synthesis.RHM	at1g78570	-0.498	Symbols: RHM1, ROL1, ATRHM1 | RHM1 (RHAMNOSE BIOSYNTHESIS 1); UDP-L-rhamnose synthase/ UDP-glucose 4,6-dehydratase/ catalytic | chr1:29549649-29552438 FORWARD
10.1.20	cell wall.precursor synthesis.phosphomannose isomerase	at3g02570	0.502	Symbols: MEE31, PMI1 | MEE31 (MATERNAL EFFECT EMBRYO ARREST 31); mannose-6-phosphate isomerase | chr3:543346-545595 REVERSE
10.1.20	cell wall.precursor synthesis.phosphomannose isomerase	at1g67070	1.213	Symbols: DIN9, PMI2 | DIN9 (DARK INDUCIBLE 9); mannose-6-phosphate isomerase | chr1:25042135-25044647 FORWARD
10.1.30.2	ell wall.precursor synthesis.sugar kinases.arabinose-1-kinase	at4g16130	0.727	Symbols: ARA1, ISA1, ATISA1 | ARA1 (ARABINOSE KINASE); ATP binding / L-arabinokinase/ galactokinase | chr4:9120867-9127938 FORWARD
10.2	cell wall.cellulose synthesis	at4g16590	4.854	Symbols: ATCSLA01, CSLA01, ATCSLA1 | ATCSLA01; cellulose synthase/ glucosyltransferase/ transferase, transferring glycosyl groups | chr4:9345150-9349221 FORWARD
10.2.1	cell wall.cellulose synthesis.cellulose synthase	at1g23480	-0.675	Symbols: ATCSLA03, CSLA03, ATCSLA3 | ATCSLA03 (CELLULOSE SYNTHASE-LIKE A3); cellulose synthase/ transferase, transferring glycosyl groups | chr1:8333020-8336385 FORWARD
10.2.1	cell wall.cellulose synthesis.cellulose synthase	at2g32530	-0.891	Symbols: ATCSLB03, CSLB03, ATCSLB3 | ATCSLB03; cellulose synthase/ transferase/ transferase, transferring glycosyl groups | chr2:13809216-13813570 FORWARD
10.2.1	cell wall.cellulose synthesis.cellulose synthase	at2g35650	-0.65	Symbols: ATCSLA07, CSLA07, ATCSLA7, CSLA7 | ATCSLA07 (CELLULOSE SYNTHASE LIKE); mannan synthase/ transferase, transferring glycosyl groups | chr2:14985488-14988357 FORWARD
10.2.1	cell wall.cellulose synthesis.cellulose synthase	at4g24010	0.937	Symbols: ATCSLG1, CSLG1 | ATCSLG1; cellulose synthase/ transferase/ transferase, transferring glycosyl groups | chr4:12466345-12469844 FORWARD
10.4.1.1	cell wall.pectin synthesis.homogalacturonan.Galacturonic Acid Trnasferase	at3g61130	-0.472	Symbols: GAUT1, LGT1 | GAUT1 (GALACTURONOSYLTRANSFERASE 1); polygalacturonate 4-alpha-galacturonosyltransferase/ transferase, transferring glycosyl groups | chr3:22621969-22625716 FORWARD
10.5	cell wall.cell wall proteins	at3g48530	0.945	Symbols: KING1 | KING1 (SNF1-RELATED PROTEIN KINASE REGULATORY SUBUNIT GAMMA 1) | chr3:17987378-17989763 FORWARD
10.5.1	cell wall.cell wall proteins.AGPs	at2g46330	-0.675	Symbols: AGP16, ATAGP16 | AGP16 (ARABINOGALACTAN PROTEIN 16) | chr2:19018509-19019255 REVERSE
10.5.1	cell wall.cell wall proteins.AGPs	at4g09030	0.766	Symbols: AGP10, ATAGP10 | AGP10 (ARABINOGALACTAN PROTEIN 10) | chr4:5792207-5792790 FORWARD
10.5.1	cell wall.cell wall proteins.AGPs	at5g40730	2.876	Symbols: AGP24, ATAGP24 | AGP24 | chr5:16301075-16301520 FORWARD
10.5.1	cell wall.cell wall proteins.AGPs	at5g64310	1.025	Symbols: AGP1, ATAGP1 | AGP1 (ARABINOGALACTAN PROTEIN 1) | chr5:25721933-25722646 FORWARD
10.5.1	cell wall.cell wall proteins.AGPs	at5g18690	-0.812	Symbols: AGP25, ATAGP25 | AGP25 (ARABINOGALACTAN PROTEINS 25) | chr5:6233519-6234206 REVERSE
10.5.1	cell wall.cell wall proteins.AGPs	at3g46550	-0.518	Symbols: SOS5 | SOS5 (salt overly sensitive 5); polysaccharide binding / protein binding | chr3:17136456-17137874 REVERSE
10.5.2	cell wall.cell wall proteins.proline rich proteins	at4g38770	-1.469	Symbols: PRP4, ATPRP4 | PRP4 (PROLINE-RICH PROTEIN 4) | chr4:18096809-18098565 REVERSE
10.5.3	cell wall.cell wall proteins.LRR	at4g06744	1.407	leucine-rich repeat family protein / extensin family protein | chr4:4070813-4072305 REVERSE
10.5.4	cell wall.cell wall proteins.HRGP	at3g22440	0.571	hydroxyproline-rich glycoprotein family protein | chr3:7959754-7962200 FORWARD
10.5.5	cell wall.cell wall proteins.RGP	at3g02230	0.531	Symbols: RGP1, ATRGP1 | RGP1 (REVERSIBLY GLYCOSYLATED POLYPEPTIDE 1); cellulose synthase (UDP-forming) | chr3:415393-417547 FORWARD
10.6.2	cell wall.degradation.mannan-xylose-arabinose-fucose	at3g52840	-0.395	Symbols: BGAL2 | BGAL2 (beta-galactosidase 2); beta-galactosidase/ catalytic/ cation binding | chr3:19581113-19586299 FORWARD
10.6.3	cell wall.degradation.pectate lyases and polygalacturonases	at5g63180	-1.097	pectate lyase family protein | chr5:25340954-25343119 REVERSE
10.6.3	cell wall.degradation.pectate lyases and polygalacturonases	at2g41850	3.839	Symbols: PGAZAT, ADPG2 | PGAZAT (POLYGALACTURONASE ABSCISSION ZONE A. THALIANA); polygalacturonase | chr2:17461655-17464161 REVERSE
10.6.3	cell wall.degradation.pectate lyases and polygalacturonases	at5g49215	-0.604	glycoside hydrolase family 28 protein / polygalacturonase (pectinase) family protein | chr5:19953487-19956116 FORWARD
10.6.3	cell wall.degradation.pectate lyases and polygalacturonases	at5g06870	2.42	Symbols: PGIP2, ATPGIP2 | PGIP2 (POLYGALACTURONASE INHIBITING PROTEIN 2); protein binding | chr5:2133918-2135166 FORWARD
10.6.3	cell wall.degradation.pectate lyases and polygalacturonases	at1g48100	-1.017	glycoside hydrolase family 28 protein / polygalacturonase (pectinase) family protein | chr1:17766874-17769951 FORWARD
10.6.3	cell wall.degradation.pectate lyases and polygalacturonases	at4g24780	-0.851	pectate lyase family protein | chr4:12770331-12772333 REVERSE
10.7	cell wall.modification	at1g69530	-0.677	Symbols: ATEXPA1, EXP1, AT-EXP1, ATEXP1, ATHEXP ALPHA 1.2 | ATEXPA1 (ARABIDOPSIS THALIANA EXPANSIN A1) | chr1:26141836-26143496 FORWARD
10.7	cell wall.modification	at2g03090	-1.115	Symbols: ATEXPA15, EXP15, ATEXP15, ATHEXP ALPHA 1.3 | ATEXPA15 (ARABIDOPSIS THALIANA EXPANSIN A15) | chr2:916854-918643 REVERSE
10.7	cell wall.modification	at2g14620	1.956	xyloglucan:xyloglucosyl transferase, putative / xyloglucan endotransglycosylase, putative / endo-xyloglucan transferase, putative | chr2:6244781-6246233 FORWARD
10.8.1	cell wall.pectin*esterases.PME	at1g11580	0.825	Symbols: ATPMEPCRA, PMEPCRA | PMEPCRA (METHYLESTERASE PCR A); enzyme inhibitor/ pectinesterase | chr1:3888690-3890811 FORWARD
10.8.1	cell wall.pectin*esterases.PME	at5g19730	-1.22	pectinesterase family protein | chr5:6670458-6673282 FORWARD
10.8.2	cell wall.pectin*esterases.acetyl esterase	at2g46930	-0.43	pectinacetylesterase, putative | chr2:19283519-19286347 FORWARD
10.8.99	cell wall.pectin*esterases.misc	at4g33220	-1.049	Symbols: PME44, ATPME44 | enzyme inhibitor/ pectinesterase | chr4:16022439-16026360 FORWARD
