# Supplementary material for: Molecular Signatures in Arabidopsis thaliana in Response to Insect Attack and Bacterial Infection
Source: PLoS One. 2013 Mar 25;8(3):e58987. doi: 10.1371/journal.pone.0058987 (PMC3607608; doi:10.1371/journal.pone.0058987)
Supplement: File S11 — A comparative list of the differentially expressed genes (aphid-specific and P. syringae-specific genes) involved in hormonal pathways with their corresponding log2-transformed expression values. (XLS) [file pone.0058987.s011.xls]

## Sheet: MapManExport
Ethylene Synthesis-degradation related genes : Aphid specific
BinCode	BinName	id	log2	description
17.5.1	hormone metabolism.ethylene.synthesis-degradation	at1g03400	0.671	2-oxoglutarate-dependent dioxygenase, putative | chr1:842747-844190 REVERSE
17.5.1	hormone metabolism.ethylene.synthesis-degradation	at1g04350	-0.793	2-oxoglutarate-dependent dioxygenase, putative | chr1:1165165-1166768 FORWARD
17.5.2	hormone metabolism.ethylene.signal transduction	at5g47230	2.387	Symbols: ERF5, ATERF-5, ATERF5 | ERF5 (ETHYLENE RESPONSIVE ELEMENT BINDING FACTOR 5); DNA binding / transcription activator/ transcription factor | chr5:19179939-19181129 FORWARD
17.5.2	hormone metabolism.ethylene.signal transduction	at4g17490	1.591	Symbols: ATERF6, ERF-6-6 | ATERF6 (ETHYLENE RESPONSIVE ELEMENT BINDING FACTOR 6); DNA binding / transcription factor | chr4:9752824-9753867 REVERSE
17.5.2	hormone metabolism.ethylene.signal transduction	at3g20310	0.808	Symbols: ATERF-7, ATERF7, ERF7 | ERF7 (ETHYLINE RESPONSE FACTOR 7); DNA binding / protein binding / transcription factor/ transcription repressor | chr3:7084806-7086805 REVERSE
17.5.2	hormone metabolism.ethylene.signal transduction	at2g44840	1.383	Symbols: ATERF13, EREBP, ERF13 | ERF13 (ETHYLENE-RESPONSIVE ELEMENT BINDING FACTOR 13); DNA binding / transcription factor | chr2:18495341-18496272 FORWARD
17.5.2	hormone metabolism.ethylene.signal transduction	at1g06160	1.335	Symbols: ORA59 | ORA59 (OCTADECANOID-RESPONSIVE ARABIDOPSIS AP2/ERF 59); DNA binding / transcription activator/ transcription factor | chr1:1883004-1883934 FORWARD
17.5.2	hormone metabolism.ethylene.signal transduction	at5g47220	2.205	Symbols: ATERF2, ATERF-2, ERF2 | ERF2 (ETHYLENE RESPONSIVE ELEMENT BINDING FACTOR 2); DNA binding / transcription activator/ transcription factor | chr5:19171862-19172823 REVERSE
17.5.2	hormone metabolism.ethylene.signal transduction	at3g15210	1.119	Symbols: ATERF-4, ERF4, RAP2.5, ATERF4 | ERF4 (ETHYLENE RESPONSIVE ELEMENT BINDING FACTOR 4); DNA binding / protein binding / transcription factor/ transcription repressor | chr3:5121422-5122562 FORWARD
17.5.2	hormone metabolism.ethylene.signal transduction	at1g28370	3.287	Symbols: ERF11, ATERF11 | ERF11 (ERF DOMAIN PROTEIN 11); DNA binding / transcription factor/ transcription repressor | chr1:9955969-9956940 REVERSE
17.5.2	hormone metabolism.ethylene.signal transduction	at2g40940	0.927	Symbols: ERS1, ERS | ERS1 (ETHYLENE RESPONSE SENSOR 1); ethylene binding / protein histidine kinase/ receptor | chr2:17084356-17087297 REVERSE
17.5.3	hormone metabolism.ethylene.induced-regulated-responsive-activated	at3g16050	0.501	Symbols: A37, ATPDX1.2, PDX1.2 | A37; protein heterodimerization | chr3:5443950-5445329 REVERSE
17.5.3	hormone metabolism.ethylene.induced-regulated-responsive-activated	at3g11930	0.436	universal stress protein (USP) family protein | chr3:3776237-3777694 FORWARD
Ethylene Synthesis-degradation related genes : Pseudomonas specific
BinCode	BinName	id	log2	description
17.5.1	hormone metabolism.ethylene.synthesis-degradation	at5g59530	1.581	2-oxoglutarate-dependent dioxygenase, putative | chr5:23994170-23995734 REVERSE
17.5.1.1	hormone metabolism.ethylene.synthesis-degradation.1-aminocyclopropane-1-carboxylate synthase	at1g62960	-0.536	Symbols: ACS10 | ACS10 (ACC SYNTHASE 10); 1-aminocyclopropane-1-carboxylate synthase/ L-aspartate:2-oxoglutarate aminotransferase/ aromatic-amino-acid:2-oxoglutarate aminotransferase | chr1:23318187-23320316 REVERSE
17.5.2	hormone metabolism.ethylene.signal transduction	at5g07580	-1.231	DNA binding / transcription factor | chr5:2399504-2400601 FORWARD
17.5.2	hormone metabolism.ethylene.signal transduction	at1g50640	0.46	Symbols: ERF3, ATERF3 | ERF3 (ETHYLENE RESPONSIVE ELEMENT BINDING FACTOR 3); DNA binding / protein binding / transcription factor/ transcription repressor | chr1:18757148-18758433 REVERSE
17.5.2	hormone metabolism.ethylene.signal transduction	at5g25190	-0.489	ethylene-responsive element-binding protein, putative | chr5:8706790-8707748 REVERSE
17.5.3	hormone metabolism.ethylene.induced-regulated-responsive-activated	at1g05710	1.141	ethylene-responsive protein, putative | chr1:1714950-1717270 FORWARD
17.5.3	hormone metabolism.ethylene.induced-regulated-responsive-activated	at3g62550	-0.705	universal stress protein (USP) family protein | chr3:23135984-23137173 FORWARD
17.5.3	hormone metabolism.ethylene.induced-regulated-responsive-activated	at3g58680	0.635	Symbols: MBF1B, ATMBF1B | MBF1B (MULTIPROTEIN BRIDGING FACTOR 1B); DNA binding / transcription coactivator | chr3:21707276-21708911 FORWARD
ABA related genes : Aphid specific
BinCode	BinName	id	log2	description
17.1.1.1.10	hormone metabolism.abscisic acid.synthesis-degradation.synthesis.9-cis-epoxycarotenoid dioxygenase	at3g14440	0.541	Symbols: NCED3, ATNCED3, STO1, SIS7 | NCED3 (NINE-CIS-EPOXYCAROTENOID DIOXYGENASE 3); 9-cis-epoxycarotenoid dioxygenase | chr3:4831288-4833599 REVERSE
17.1.1.1.12	hormone metabolism.abscisic acid.synthesis-degradation.synthesis.abscisic aldehyde oxidase	at2g27150	0.682	Symbols: AAO3 | AAO3 (Abscisic ALDEHYDE OXIDASE 3); abscisic aldehyde oxidase/ aldehyde oxidase/ indole-3-acetaldehyde oxidase | chr2:11601754-11607161 FORWARD
17.1.3	hormone metabolism.abscisic acid.induced-regulated-responsive-activated	at1g69700	-0.705	Symbols: ATHVA22C | ATHVA22C | chr1:26220238-26221825 FORWARD
17.1.3	hormone metabolism.abscisic acid.induced-regulated-responsive-activated	at4g24960	-0.643	Symbols: ATHVA22D, HVA22D | ATHVA22D | chr4:12827937-12829243 FORWARD
ABA related genes : Pseudomonas specific
BinCode	BinName	id	log2	description
17.1.1	hormone metabolism.abscisic acid.synthesis-degradation	at1g19950	-0.512	Symbols: HVA22H | HVA22H (HVA22-LIKE PROTEIN H (ATHVA22H)) | chr1:6924184-6926724 FORWARD
17.1.1	hormone metabolism.abscisic acid.synthesis-degradation	at1g16540	0.606	Symbols: SIR3, LOS5, ABA3, ATABA3 | ABA3 (ABA DEFICIENT 3); Mo-molybdopterin cofactor sulfurase/ selenocysteine lyase | chr1:5659415-5665449 FORWARD
17.1.1	hormone metabolism.abscisic acid.synthesis-degradation	at5g42560	0.484	abscisic acid-responsive HVA22 family protein | chr5:17014923-17017252 FORWARD
17.1.3	hormone metabolism.abscisic acid.induced-regulated-responsive-activated	at1g28200	0.49	Symbols: FIP1 | FIP1 (FH INTERACTING PROTEIN 1) | chr1:9850147-9852366 REVERSE
17.1.3	hormone metabolism.abscisic acid.induced-regulated-responsive-activated	at5g59220	2.482	protein phosphatase 2C, putative / PP2C, putative | chr5:23894404-23896619 REVERSE
17.1.3	hormone metabolism.abscisic acid.induced-regulated-responsive-activated	at5g53820	1.371	unknown protein | chr5:21853397-21854117 FORWARD
				17.7.1.5	hormone metabolism.jasmonate.synthesis-degradation.12-Oxo-PDA-reductase	at1g18020	Transcript	12-oxophytodienoate reductase, putative | chr1:6202249-6203918 FORWARD	1.238
				17.7.1.5	hormone metabolism.jasmonate.synthesis-degradation.12-Oxo-PDA-reductase	at1g17990	Transcript	12-oxophytodienoate reductase, putative | chr1:6192071-6194093 REVERSE	1.319
IAA related genes : Aphid specific
BinCode	BinName	id	log2	description
17.2	hormone metabolism.auxin	at3g10870	-1.161	Symbols: MES17, ATMES17 | MES17 (METHYL ESTERASE 17); hydrolase/ hydrolase, acting on ester bonds / methyl indole-3-acetate esterase | chr3:3401078-3402672 REVERSE
17.2.1	hormone metabolism.auxin.synthesis-degradation	at5g56650	0.421	Symbols: ILL1 | ILL1; IAA-amino acid conjugate hydrolase/ metallopeptidase | chr5:22930825-22932778 FORWARD
17.2.2	hormone metabolism.auxin.signal transduction	at1g68370	0.381	Symbols: ARG1 | ARG1 (ALTERED RESPONSE TO GRAVITY 1); cytoskeletal protein binding | chr1:25631745-25634738 REVERSE
17.2.2	hormone metabolism.auxin.signal transduction	at1g77690	-0.668	Symbols: LAX3 | LAX3 (LIKE AUX1 3); amino acid transmembrane transporter/ auxin influx transmembrane transporter/ transporter | chr1:29200941-29203340 REVERSE
17.2.2	hormone metabolism.auxin.signal transduction	at1g05180	0.463	Symbols: AXR1 | AXR1 (AUXIN RESISTANT 1); small protein activating enzyme | chr1:1498114-1501824 REVERSE
17.2.2	hormone metabolism.auxin.signal transduction	at3g26810	-0.3	Symbols: AFB2 | AFB2 (AUXIN SIGNALING F-BOX 2); auxin binding / ubiquitin-protein ligase | chr3:9867845-9870640 FORWARD
17.2.3	hormone metabolism.auxin.induced-regulated-responsive-activated	at5g13320	2.356	Symbols: PBS3, GDG1, WIN3, GH3.12 | PBS3 (AVRPPHB SUSCEPTIBLE 3) | chr5:4267510-4271051 FORWARD
17.2.3	hormone metabolism.auxin.induced-regulated-responsive-activated	at3g03830	-0.385	auxin-responsive protein, putative | chr3:979984-980488 REVERSE
17.2.3	hormone metabolism.auxin.induced-regulated-responsive-activated	at1g75590	-0.388	auxin-responsive family protein | chr1:28382896-28383768 REVERSE
17.2.3	hormone metabolism.auxin.induced-regulated-responsive-activated	at2g20120	-0.513	Symbols: COV1 | COV1 (CONTINUOUS VASCULAR RING) | chr2:8687354-8689476 REVERSE
17.2.3	hormone metabolism.auxin.induced-regulated-responsive-activated	at1g72430	-0.564	auxin-responsive protein-related | chr1:27264911-27265630 REVERSE
17.2.3	hormone metabolism.auxin.induced-regulated-responsive-activated	at2g21220	-0.93	auxin-responsive protein, putative | chr2:9089326-9089813 FORWARD
17.2.3	hormone metabolism.auxin.induced-regulated-responsive-activated	at5g35735	0.984	auxin-responsive family protein | chr5:13900752-13902997 REVERSE
17.2.3	hormone metabolism.auxin.induced-regulated-responsive-activated	at4g34790	-1.408	auxin-responsive family protein | chr4:16594469-16595153 FORWARD
17.2.3	hormone metabolism.auxin.induced-regulated-responsive-activated	at5g65470	-0.896	unknown protein | chr5:26172131-26175033 FORWARD
17.2.3	hormone metabolism.auxin.induced-regulated-responsive-activated	at1g29420	-0.736	FUNCTIONS IN: molecular_function unknown; INVOLVED IN: response to auxin stimulus; LOCATED IN: cellular_component unknown; CONTAINS InterPro DOMAIN/s: Auxin responsive SAUR protein (InterPro:IPR003676); BEST Arabidopsis thaliana protein match is: SAUR68 (SMALL AUXIN UPREGULATED 68) (TAIR:AT1G29510.1); Has 372 Blast hits to 362 proteins in 16 species: Archae - 0; Bacteria - 0; Metazoa - 0; Fungi -…
17.2.3	hormone metabolism.auxin.induced-regulated-responsive-activated	at5g01100	0.672	unknown protein | chr5:34596-37948 REVERSE
17.2.3	hormone metabolism.auxin.induced-regulated-responsive-activated	at3g12830	1.826	auxin-responsive family protein | chr3:4078651-4079608 REVERSE
17.2.3	hormone metabolism.auxin.induced-regulated-responsive-activated	at3g54100	0.883	unknown protein | chr3:20034071-20037953 REVERSE
17.2.3	hormone metabolism.auxin.induced-regulated-responsive-activated	at2g21200	-0.435	auxin-responsive protein, putative | chr2:9083906-9084375 REVERSE
17.2.3	hormone metabolism.auxin.induced-regulated-responsive-activated	at3g07390	0.485	Symbols: AIR12 | AIR12; extracellular matrix structural constituent | chr3:2365301-2366496 FORWARD
17.2.3	hormone metabolism.auxin.induced-regulated-responsive-activated	at5g20730	0.447	Symbols: NPH4, MSG1, IAA21, ARF7, TIR5, BIP | NPH4 (NON-PHOTOTROPHIC HYPOCOTYL); DNA binding / transcription activator/ transcription factor/ transcription regulator | chr5:7016470-7022113 REVERSE
17.2.3	hormone metabolism.auxin.induced-regulated-responsive-activated	at3g15450	0.859	unknown protein | chr3:5212984-5214121 FORWARD
17.2.3	hormone metabolism.auxin.induced-regulated-responsive-activated	at3g60690	1.274	auxin-responsive family protein | chr3:22435121-22435949 FORWARD
17.2.3	hormone metabolism.auxin.induced-regulated-responsive-activated	at1g56150	1.523	auxin-responsive family protein | chr1:21017385-21017939 FORWARD
17.2.3	hormone metabolism.auxin.induced-regulated-responsive-activated	at2g16580	-0.771	auxin-responsive protein, putative | chr2:7184422-7186968 REVERSE
IAA related genes : Pseudomonas specific
BinCode	BinName	id	log2	description
17.2.1	hormone metabolism.auxin.synthesis-degradation	at1g51780	3.484	Symbols: ILL5 | ILL5; IAA-amino acid conjugate hydrolase/ metallopeptidase | chr1:19204512-19206586 FORWARD
17.2.1	hormone metabolism.auxin.synthesis-degradation	at5g25980	0.487	Symbols: TGG2, BGLU37 | TGG2 (GLUCOSIDE GLUCOHYDROLASE 2); hydrolase, hydrolyzing O-glycosyl compounds / thioglucosidase | chr5:9072727-9075690 FORWARD
17.2.1	hormone metabolism.auxin.synthesis-degradation	at3g02875	2.081	Symbols: ILR1 | ILR1 (IAA-LEUCINE RESISTANT 1); IAA-Leu conjugate hydrolase/ IAA-Phe conjugate hydrolase/ metallopeptidase | chr3:631913-634074 FORWARD
17.2.3	hormone metabolism.auxin.induced-regulated-responsive-activated	at4g12980	-1.462	auxin-responsive protein, putative | chr4:7589395-7591102 REVERSE
17.2.3	hormone metabolism.auxin.induced-regulated-responsive-activated	at2g45210	1.559	auxin-responsive protein-related | chr2:18641566-18642704 FORWARD
17.2.3	hormone metabolism.auxin.induced-regulated-responsive-activated	at2g21210	-0.528	auxin-responsive protein, putative | chr2:9085210-9085909 REVERSE
17.2.3	hormone metabolism.auxin.induced-regulated-responsive-activated	at3g03850	-0.794	auxin-responsive protein, putative | chr3:983121-983751 FORWARD
17.2.3	hormone metabolism.auxin.induced-regulated-responsive-activated	at1g60690	-0.619	aldo/keto reductase family protein | chr1:22349892-22351668 REVERSE
17.2.3	hormone metabolism.auxin.induced-regulated-responsive-activated	at4g38850	-0.939	Symbols: SAUR_AC1, ATSAUR15, SAUR15, SAUR-AC1 | SAUR15 (SMALL AUXIN UPREGULATED 15) | chr4:18126171-18126680 FORWARD
17.2.3	hormone metabolism.auxin.induced-regulated-responsive-activated	at4g37390	2.073	Symbols: YDK1, GH3.2, BRU6, GH3-2, AUR3 | BRU6; indole-3-acetic acid amido synthetase | chr4:17579657-17582022 FORWARD
17.2.3	hormone metabolism.auxin.induced-regulated-responsive-activated	at5g50760	3.281	auxin-responsive family protein | chr5:20644661-20645469 FORWARD
17.2.3	hormone metabolism.auxin.induced-regulated-responsive-activated	at3g22850	0.867	unknown protein | chr3:8089003-8090470 FORWARD
17.2.3	hormone metabolism.auxin.induced-regulated-responsive-activated	at5g54510	2.433	Symbols: GH3.6, DFL1 | DFL1 (DWARF IN LIGHT 1); indole-3-acetic acid amido synthetase | chr5:22131093-22133678 REVERSE
17.2.3	hormone metabolism.auxin.induced-regulated-responsive-activated	at5g18010	-1.276	auxin-responsive protein, putative | chr5:5962897-5963405 REVERSE
17.2.3	hormone metabolism.auxin.induced-regulated-responsive-activated	at4g27260	1.332	Symbols: GH3.5, WES1 | WES1; indole-3-acetic acid amido synthetase | chr4:13653609-13656204 FORWARD
17.2.3	hormone metabolism.auxin.induced-regulated-responsive-activated	at4g03400	0.78	Symbols: DFL2, GH3-10 | DFL2 (DWARF IN LIGHT 2) | chr4:1497536-1499865 REVERSE
17.2.3	hormone metabolism.auxin.induced-regulated-responsive-activated	at1g20470	-0.684	auxin-responsive family protein | chr1:7094260-7094869 FORWARD
17.2.3	hormone metabolism.auxin.induced-regulated-responsive-activated	at5g13370	0.625	auxin-responsive GH3 family protein | chr5:4286819-4289554 FORWARD
JA related genes : Aphid specific
BinCode	BinName	id	log2	description
17.7.1.2	hormone metabolism.jasmonate.synthesis-degradation.lipoxygenase	at1g72520	1.002	lipoxygenase, putative | chr1:27308515-27312754 FORWARD
17.7.1.2	hormone metabolism.jasmonate.synthesis-degradation.lipoxygenase	at3g22400	0.421	Symbols: LOX5 | LOX5; electron carrier/ iron ion binding / lipoxygenase/ metal ion binding / oxidoreductase, acting on single donors with incorporation of molecular oxygen, incorporation of two atoms of oxygen | chr3:7926879-7931351 FORWARD
17.7.1.2	hormone metabolism.jasmonate.synthesis-degradation.lipoxygenase	at1g67560	0.59	lipoxygenase family protein | chr1:25319899-25324264 FORWARD
17.7.1.5	hormone metabolism.jasmonate.synthesis-degradation.12-Oxo-PDA-reductase	at1g18020	1.238	12-oxophytodienoate reductase, putative | chr1:6202249-6203918 FORWARD
17.7.1.5	hormone metabolism.jasmonate.synthesis-degradation.12-Oxo-PDA-reductase	at1g17990	1.319	12-oxophytodienoate reductase, putative | chr1:6192071-6194093 REVERSE
JA related genes : Pseudomonas specific
BinCode	BinName	id	log2	description
17.7.1.2	hormone metabolism.jasmonate.synthesis-degradation.lipoxygenase	at1g55020	0.992	Symbols: LOX1 | LOX1; lipoxygenase | chr1:20525708-20530273 FORWARD
17.7.1.3	hormone metabolism.jasmonate.synthesis-degradation.allene oxidase synthase	at5g42650	1.302	Symbols: AOS, CYP74A, DDE2 | AOS (ALLENE OXIDE SYNTHASE); allene oxide synthase/ hydro-lyase/ oxygen binding | chr5:17097595-17099395 REVERSE
17.7.1.4	hormone metabolism.jasmonate.synthesis-degradation.allene oxidase cyclase	at3g25770	1.673	Symbols: AOC2 | AOC2 (ALLENE OXIDE CYCLASE 2); allene-oxide cyclase | chr3:9406873-9407955 FORWARD
17.7.1.4	hormone metabolism.jasmonate.synthesis-degradation.allene oxidase cyclase	at1g13280	0.686	Symbols: AOC4 | AOC4 (ALLENE OXIDE CYCLASE 4); allene-oxide cyclase | chr1:4547454-4548875 FORWARD
17.7.1.5	hormone metabolism.jasmonate.synthesis-degradation.12-Oxo-PDA-reductase	at1g76680	-1.142	Symbols: OPR1 | OPR1; 12-oxophytodienoate reductase | chr1:28776861-28778467 FORWARD
17.7.1.10	hormone metabolism.jasmonate.synthesis-degradation.jasmonate-O-methyltransferase	at1g19640	1.074	Symbols: JMT | JMT (JASMONIC ACID CARBOXYL METHYLTRANSFERASE); jasmonate O-methyltransferase | chr1:6788885-6791846 REVERSE
17.7.3	hormone metabolism.jasmonate.induced-regulated-responsive-activated	at3g16460	2.439	jacalin lectin family protein | chr3:5592582-5595710 FORWARD
17.7.3	hormone metabolism.jasmonate.induced-regulated-responsive-activated	at5g48180	2.293	Symbols: NSP5 | NSP5 (NITRILE SPECIFIER PROTEIN 5) | chr5:19540937-19542426 REVERSE
17.7.3	hormone metabolism.jasmonate.induced-regulated-responsive-activated	at3g16470	2.685	Symbols: JR1 | JR1 | chr3:5595938-5598044 REVERSE
SA related genes : Aphid specific
BinCode	BinName	id	log2	description
17.8.1	hormone metabolism.salicylic acid.synthesis-degradation	at3g21950	-0.964	methyltransferase | chr3:7734396-7736394 FORWARD
SA related genes : Pseudomonas specific
BinCode	BinName	id	log2	description
17.8.1	hormone metabolism.salicylic acid.synthesis-degradation	at3g11480	3.609	Symbols: BSMT1, ATBSMT1 | BSMT1; S-adenosylmethionine-dependent methyltransferase | chr3:3614437-3617314 FORWARD
17.8.1	hormone metabolism.salicylic acid.synthesis-degradation	at1g05680	2.377	UDP-glucoronosyl/UDP-glucosyl transferase family protein | chr1:1703092-1704691 REVERSE
