# Supplementary material for: Molecular Signatures in Arabidopsis thaliana in Response to Insect Attack and Bacterial Infection
Source: PLoS One. 2013 Mar 25;8(3):e58987. doi: 10.1371/journal.pone.0058987 (PMC3607608; doi:10.1371/journal.pone.0058987)
Supplement: File S12 — Details of all of the TFs that were differentially expressed during the aphid and Pseudmonas treatments. (XLS) [file pone.0058987.s012.xls]

## Sheet: TF-Pseudomonas
TF-Pseudomonas
At5g52510	scarecrow-like transcription factor 8 (SCL8)
At2g26580	YAB5,plant-specific transcription factor YABBY family protein
At5g06710	HAT14,HAT14 (homeobox-leucine zipper protein 14); DNA binding,HAT14 (homeobox-leucine zipper protein 14); DNA binding / transcription factor
At2g46270	GBF3,GBF3 (G-BOX BINDING FACTOR 3); transcription factor
At4g31800	WRKY18,WRKY18 (WRKY DNA-binding protein 18); transcription factor
At4g32570	TIFY8,unknown protein
At5g05410	DREB2A,DREB2A (DRE-BINDING PROTEIN 2A); DNA binding / transcription factor/ transcriptional activator
At4g21750	ATML1,ATML1 (MERISTEM LAYER 1); DNA binding,ATML1 (MERISTEM LAYER 1); DNA binding / transcription factor
At3g04060	ANAC046,ANAC046 (Arabidopsis NAC domain containing protein 46); transcription factor
At4g16110	ARR2,ARR2 (ARABIDOPSIS RESPONSE REGULATOR 2); transcription factor/ two-component response regulator
At4g27410	RD26,RD26 (RESPONSIVE TO DESSICATION 26),RD26 (RESPONSIVE TO DESSICATION 26); transcription factor
At1g72450	TIFY11B,JAZ6,unknown protein
At1g50640	ERF3,ATERF3,ATERF3/ERF3 (ETHYLENE RESPONSIVE ELEMENT BINDING FACTOR 3); DNA binding / protein binding / transcription factor/ transcriptional repressor
At4g22950	AGL19,AGL19 (AGAMOUS-LIKE 19); transcription factor
At3g16500	PAP1,PAP1 (PHYTOCHROME-ASSOCIATED PROTEIN 1); transcription factor
At5g47370	HAT2,HAT2; transcription factor
At1g04240	SHY2,SHY2 (SHORT HYPOCOTYL 2); transcription factor
At2g46680	ATHB-7,ATHB-7 (ARABIDOPSIS THALIANA HOMEOBOX 7),ATHB-7 (ARABIDOPSIS THALIANA HOMEOBOX 7); transcription factor
At1g01780	LIM domain-containing protein
At1g71520	AP2 domain-containing transcription factor, putative
At1g74430	MYB95,MYB95 (myb domain protein 95); DNA binding / transcription factor
At3g11580	DNA-binding protein, putative
At1g48000	MYB112,MYB112 (myb domain protein 112); DNA binding / transcription factor
At5g67300	MYBR1,AtMYBr1,AtMYB44,AtMYB44/AtMYBr1 (myb domain protein 44, myb domain protein r1); DNA binding / transcription factor
At5g25190	ethylene-responsive element-binding protein, putative
At1g32700	zinc-binding family protein
At2g25900	ATCTH,ATCTH (Arabidopsis thaliana Cys3His zinc finger protein); transcription factor
At2g41940	ZFP8,ZFP8 (ZINC FINGER PROTEIN 8); nucleic acid binding / transcription factor/ zinc ion binding
At4g14560	IAA1,IAA1 (INDOLE-3-ACETIC ACID INDUCIBLE); transcription factor
At1g52890	ANAC019,ANAC019 (Arabidopsis NAC domain containing protein 19); transcription factor
At1g56010	NAC1,NAC1 (Arabidopsis NAC domain containing protein 21, Arabidopsis NAC domain containing protein 22); transcription factor
At2g22300	ethylene-responsive calmodulin-binding protein, putative (SR1),unknown protein
At5g02840	LCL1,DNA binding / transcription factor,myb family transcription factor
At3g59060	PIL6,PIL6 (PHYTOCHROME-INTERACTING FACTOR 5); DNA binding / transcription factor
At1g28050	zinc finger (B-box type) family protein
At1g25440	zinc finger (B-box type) family protein
At5g65310	ATHB5,ATHB5 (ARABIDOPSIS THALIANA HOMEOBOX PROTEIN 5),ATHB5 (ARABIDOPSIS THALIANA HOMEOBOX PROTEIN 5); transcription factor
At3g02150	PTF1,PTF1 (PLASTID TRANSCRIPTION FACTOR 1); transcription factor
At2g28710	zinc finger (C2H2 type) family protein
At4g18890	brassinosteroid signalling positive regulator-related
At5g39610	ATNAC6,ATNAC2,ANAC092,ANAC092/ATNAC2/ATNAC6 (Arabidopsis NAC domain containing protein 92); protein heterodimerization/ protein homodimerization/ transcription factor
At1g08810	MYB60,MYB60 (myb domain protein 60); DNA binding,MYB60 (myb domain protein 60); DNA binding / transcription factor
At1g14600	DNA binding / transcription factor
At4g00180	YAB3,YAB3 (YABBY3),YAB3 (YABBY3); transcription factor
At4g36060	basic helix-loop-helix (bHLH) family protein
At1g09770	ATCDC5,ATCDC5 (Arabidopsis thaliana homolog of cdc5); DNA binding / transcription factor
At4g17500	ATERF-1,ATERF-1 (ETHYLENE RESPONSIVE ELEMENT BINDING FACTOR 1); DNA binding / transcription factor/ transcriptional activator
At3g50260	CEJ1,ATERF#011,ATERF#011/CEJ1 (COOPERATIVELY REGULATED BY ETHYLENE AND JASMONATE 1); DNA binding / transcription factor
At3g51960	bZIP family transcription factor
At3g61150	HDG1,HDG1 (HOMEODOMAIN GLABROUS1); DNA binding / transcription factor
At5g13220	TIFY9,JAZ10,JAS1,unknown protein
At5g05090	myb family transcription factor
At5g43700	ATAUX2-11,ATAUX2-11 (indoleacetic acid-induced protein 4); transcription factor
At3g46600	scarecrow transcription factor family protein
At3g60390	HAT3,HAT3 (homeobox-leucine zipper protein 3); transcription factor
At5g20900	TIFY3B,JAZ12,unknown protein
At1g27050	ATHB54,ATHB54 (ARABIDOPSIS THALIANA HOMEOBOX PROTEIN 54); nucleic acid binding / transcription factor
At2g36080	DNA-binding protein, putative
At2g45190	AFO,AFO (ABNORMAL FLORAL ORGANS); transcription factor
At5g47640	CCAAT-box binding transcription factor subunit B (NF-YB) (HAP3 ) (AHAP3) family (Hap3b)
At5g51190	AP2 domain-containing transcription factor, putative
At3g13810	ATIDD11,ATIDD11 (ARABIDOPSIS THALIANA INDETERMINATE(ID)-DOMAIN 11); nucleic acid binding / transcription factor/ zinc ion binding
At4g01540	NTM1,ANAC068,ANAC068/NTM1 (NAC WITH TRANSMEMBRANE MOTIF1),ANAC068/NTM1 (NAC WITH TRANSMEMBRANE MOTIF1); transcription factor/ transcriptional activator
At4g31550	WRKY11,WRKY11 (WRKY DNA-binding protein 11); transcription factor
At1g24625	ZFP7,ZFP7 (ZINC FINGER PROTEIN 7); nucleic acid binding / transcription factor/ zinc ion binding
At2g28510	Dof-type zinc finger domain-containing protein
At2g18090	PHD finger family protein / SWIB complex BAF60b domain-containing protein / GYF domain-containing protein
At4g04890	PDF2,PDF2 (PROTODERMAL FACTOR2); DNA binding / transcription factor
At1g66140	ZFP4,ZFP4 (ZINC FINGER PROTEIN 4); nucleic acid binding / transcription factor/ zinc ion binding
At1g51950	IAA18,IAA18 (indoleacetic acid-induced protein 18); transcription factor
At5g04760	myb family transcription factor
At5g08330	TCP family transcription factor, putative
At5g54630	zinc finger protein-related
At2g20180	PIL5,PIL5 (PHYTOCHROME INTERACTING FACTOR 3-LIKE 5); transcription factor
At3g23030	IAA2,IAA2 (indoleacetic acid-induced protein 2); transcription factor
At5g22380	ANAC090,ANAC090 (Arabidopsis NAC domain containing protein 90); transcription factor
At3g60530	zinc finger (GATA type) family protein
At5g07580	DNA binding / transcription factor
At1g10585	transcription factor
At3g55770	LIM domain-containing protein,zinc ion binding
At3g60630	scarecrow transcription factor family protein
At1g30490	PHV,PHV (PHAVOLUTA); DNA binding / transcription factor
At1g70700	TIFY7,JAZ9,unknown protein
At1g18570	MYB51,MYB51 (myb domain protein 51); DNA binding / transcription factor
At2g35940	BLH1,BLH1 (BLH1),BLH1 (BLH1); DNA binding / transcription factor,BLH1 (BLH1); transcription factor
At5g46760	basic helix-loop-helix (bHLH) family protein
At4g34530	basic helix-loop-helix (bHLH) family protein
At3g10500	ANAC053,ANAC053 (Arabidopsis NAC domain containing protein 53); transcription factor
At1g19180	TIFY10A,JAZ1,unknown protein
At2g42680	MBF1A,ATMBF1A,ATMBF1A/MBF1A (MULTIPROTEIN BRIDGING FACTOR 1A); DNA binding / transcription coactivator
At1g68840	RAV2,RAV2 (REGULATOR OF THE ATPASE OF THE VACUOLAR MEMBRANE); DNA binding / transcription factor
At5g14260	SET domain-containing protein
At1g76110	high mobility group (HMG1/2) family protein / ARID/BRIGHT DNA-binding domain-containing protein
At2g02450	ANAC035,ANAC034,ANAC034/ANAC035 (Arabidopsis NAC domain containing protein 34, Arabidopsis NAC domain containing protein 35); transcription factor
At3g58680	MBF1B,ATMBF1B,ATMBF1B/MBF1B (MULTIPROTEIN BRIDGING FACTOR 1B); DNA binding / transcription coactivator
At1g74950	TIFY10B,JAZ2,unknown protein
At1g56650	PAP1,PAP1 (PRODUCTION OF ANTHOCYANIN PIGMENT 1); DNA binding / transcription factor
At5g53200	TRY,TRY (TRIPTYCHON); DNA binding / transcription factor
At2g33310	IAA13,IAA13 (indoleacetic acid-induced protein 13); transcription factor,unknown protein
At1g32640	ATMYC2,ATMYC2 (JASMONATE INSENSITIVE 1); DNA binding / transcription factor
At5g01900	WRKY62,WRKY62 (WRKY DNA-binding protein 62); transcription factor
At1g21910	AP2 domain-containing transcription factor family protein
At2g46510	basic helix-loop-helix (bHLH) family protein
At3g16770	RAP2.3,ERF72,ATEBP,ATEBP/RAP2.3 (RELATED TO AP2 3); DNA binding / protein binding / transcription factor/ transcriptional activator
At2g24790	COL3,COL3 (CONSTANS-LIKE 3); protein binding / transcription factor/ zinc ion binding,COL3 (CONSTANS-LIKE 3); zinc ion binding
At1g78280	transcription factor jumonji (jmjC) domain-containing protein
At1g22590	AGL87,MADS-box family protein
At1g69570	Dof-type zinc finger domain-containing protein
At3g55980	zinc finger (CCCH-type) family protein
At1g66380	MYB114,MYB114 (myb domain protein 114); DNA binding / transcription factor
At5g61600	ethylene-responsive element-binding family protein
At1g66230	MYB20,MYB20 (myb domain protein 20); DNA binding / transcription factor
At5g62470	MYB96,MYB96 (myb domain protein 96); DNA binding / transcription factor
At2g23320	WRKY15,WRKY15 (WRKY DNA-binding protein 15); transcription factor
At3g15540	IAA19,IAA19 (indoleacetic acid-induced protein 19); transcription factor
At3g44350	ANAC061,ANAC061 (Arabidopsis NAC domain containing protein 61); transcription factor,unknown protein
At2g43010	PIF4,PIF4 (PHYTOCHROME INTERACTING FACTOR 4); DNA binding / transcription factor
At4g36540	BEE2,BEE2 (BR ENHANCED EXPRESSION 2); DNA binding / transcription factor
At1g04250	AXR3,AXR3 (AUXIN RESISTANT 3); transcription factor
At1g01720	ATAF1,ATAF1 (Arabidopsis NAC domain containing protein 2); transcription factor
At3g02380	COL2,COL2 (CONSTANS-LIKE 2); transcription factor/ zinc ion binding
At2g22200	AP2 domain-containing transcription factor
At5g13180	ANAC083,ANAC083 (Arabidopsis NAC domain containing protein 83); transcription factor
At2g27050	EIL1,EIL1 (ETHYLENE-INSENSITIVE3-LIKE 1); transcription factor
At1g24610	SET domain-containing protein
At3g54620	BZO2H4,BZO2H4 (basic leucine zipper O2 homolog 4); transcription factor,unknown protein
At5g59820	RHL41,RHL41 (RESPONSIVE TO HIGH LIGHT 41); nucleic acid binding / transcription factor/ zinc ion binding
At2g21530	forkhead-associated domain-containing protein / FHA domain-containing protein
At1g53910	RAP2.12,RAP2.12; DNA binding / transcription factor
At3g02830	ZFN1,ZFN1 (ZINC FINGER PROTEIN 1); nucleic acid binding
At3g23050	IAA7,IAA7 (AUXIN RESISTANT 2),IAA7 (AUXIN RESISTANT 2); transcription factor
At4g37180	myb family transcription factor
At1g66390	PAP2,PAP2 (PRODUCTION OF ANTHOCYANIN PIGMENT 2); DNA binding / transcription factor
At1g53160	SPL4,SPL4 (SQUAMOSA PROMOTER BINDING PROTEIN-LIKE 4); DNA binding,SPL4 (SQUAMOSA PROMOTER BINDING PROTEIN-LIKE 4); DNA binding / transcription factor
At4g14540	CCAAT-box binding transcription factor subunit B (NF-YB) (HAP3 ) (AHAP3) family
At3g53370	DNA-binding S1FA family protein
At5g29000	myb family transcription factor,unknown protein
At5g13080	WRKY75,WRKY75 (WRKY DNA-binding protein 75); transcription factor
At5g67480	BT4,BT4 (BTB AND TAZ DOMAIN PROTEIN 4); protein binding,BT4 (BTB AND TAZ DOMAIN PROTEIN 4); protein binding / transcription regulator
At2g34600	TIFY5B,JAZ7,unknown protein
At1g77920	bZIP family transcription factor
At3g15500	ATNAC3,ATNAC3 (ARABIDOPSIS NAC DOMAIN CONTAINING PROTEIN 55); transcription factor
At1g66350	RGL1,RGL1 (RGA-LIKE 1); transcription factor
At2g41710	ovule development protein, putative
At4g17460	HAT1,HAT1 (homeobox-leucine zipper protein 1); DNA binding / transcription factor
At1g25550	myb family transcription factor
At1g53320	AtTLP7,AtTLP7 (TUBBY LIKE PROTEIN 7); phosphoric diester hydrolase/ transcription factor
At5g54070	AT-HSFA9,AT-HSFA9 (Arabidopsis thaliana heat shock transcription factor A9); DNA binding / transcription factor
At3g53680	PHD finger transcription factor, putative
At1g30210	TCP24,TCP24; transcription factor
At5g28770	BZO2H3,BZO2H3 (basic leucine zipper O2 homolog 3); DNA binding / transcription factor
At4g34990	AtMYB32,AtMYB32 (myb domain protein 32); DNA binding / transcription factor
At4g21440	ATMYB102,ATM4,ATM4/ATMYB102 (ARABIDOPSIS MYB-LIKE 102); DNA binding / transcription factor
At5g08130	BIM1,BIM1 (BES1-interacting Myc-like protein 1); DNA binding / transcription factor,unknown protein
At4g18020	APRR2,APRR2 (PSEUDO-RESPONSE REGULATOR 2),APRR2 (PSEUDO-RESPONSE REGULATOR 2); transcription factor
At5g24110	WRKY30,WRKY30 (WRKY DNA-binding protein 30); transcription factor
At3g09735	DNA-binding S1FA family protein
At5g44190	GLK2,GLK2 (GOLDEN2-LIKE 2); DNA binding / transcription factor
At1g61730	DNA-binding storekeeper protein-related
At2g44940	AP2 domain-containing transcription factor TINY, putative
At1g43160	RAP2.6,RAP2.6 (related to AP2 6); DNA binding / transcription factor
At1g62300	WRKY6,WRKY6 (WRKY DNA-binding protein 6); transcription factor
At4g31420	zinc finger (C2H2 type) family protein
At4g36990	HSF4,HSF4 (HEAT SHOCK FACTOR 4); DNA binding / transcription factor
At5g49450	ATBZIP1,bZIP family transcription factor
At5g62430	CDF1,CDF1 (CYCLING DOF FACTOR 1); DNA binding / protein binding / transcription factor
At1g68520	zinc finger (B-box type) family protein
At4g36240	zinc finger (GATA type) family protein
At5g50670	squamosa promoter-binding protein, putative
At3g61890	ATHB-12,ATHB-12 (ARABIDOPSIS THALIANA HOMEOBOX PROTEIN 1); transcription factor
At5g59780	MYB59,MYB59 (myb domain protein 59); DNA binding / transcription factor
At2g22540	SVP,SVP (SHORT VEGETATIVE PHASE); transcription factor
At1g75710	zinc finger (C2H2 type) family protein
At4g17230	SCL13,SCL13 (SCARECROW-LIKE 13); transcription factor
At1g53230	TCP3,TCP3 (TCP family transcription factor 3); transcription factor
At1g51070	basic helix-loop-helix (bHLH) family protein
At5g65210	TGA1,DNA binding / calmodulin binding / transcription factor,bZIP family transcription factor (TGA1)
At2g16720	MYB7,MYB7 (myb domain protein 7); DNA binding / transcription factor
At3g11450	DNAJ heat shock N-terminal domain-containing protein / cell division protein-related
At5g61590	AP2 domain-containing transcription factor family protein
At2g18280	AtTLP2,AtTLP2 (TUBBY LIKE PROTEIN 2); phosphoric diester hydrolase/ transcription factor
At5g60200	Dof-type zinc finger domain-containing protein
At3g50060	MYB77,myb family transcription factor
At2g22670	IAA8,IAA8 (indoleacetic acid-induced protein 8),IAA8 (indoleacetic acid-induced protein 8); transcription factor
At1g14030	ribulose-1,5 bisphosphate carboxylase oxygenase large subunit N-methyltransferase, putative
At5g13330	RAP2.6L,RAP2.6L (related to AP2 6L); DNA binding / transcription factor
At3g49940	LBD38,LOB domain protein 38 / lateral organ boundaries domain protein 38 (LBD38)
At2g47520	AP2 domain-containing transcription factor, putative
At5g24590	TIP,TIP (TCV-INTERACTING PROTEIN); transcription factor
At4g01060	ETC3,DNA binding / transcription factor,myb family transcription factor
At1g53170	ATERF8,ATERF-8,ATERF-8/ATERF8 (ETHYLENE RESPONSE ELEMENT BINDING FACTOR 4); DNA binding / transcription factor/ transcriptional repressor

## Sheet: TF-Aphid
TF-Aphid
At5g11590	TINY2,TINY2 (TINY2); DNA binding / transcription factor
At2g46270	GBF3,GBF3 (G-BOX BINDING FACTOR 3); transcription factor
At4g01720	WRKY47,WRKY47 (WRKY DNA-binding protein 47); transcription factor
At4g32570	TIFY8,unknown protein
At5g67180	AP2 domain-containing transcription factor, putative
At5g48150	PAT1,PAT1 (PHYTOCHROME A SIGNAL TRANSDUCTION 1); transcription factor
At5g06100	MYB33,ATMYB33,ATMYB33/MYB33 (myb domain protein 33),ATMYB33/MYB33 (myb domain protein 33); DNA binding / transcription factor
At5g05410	DREB2A,DREB2A (DRE-BINDING PROTEIN 2A); DNA binding / transcription factor/ transcriptional activator
At1g02230	ANAC004,ANAC004 (Arabidopsis NAC domain containing protein 4); transcription factor
At5g22290	ANAC089,ANAC089 (Arabidopsis NAC domain containing protein 89); transcription factor
At2g32700	WD-40 repeat family protein
At3g23250	MYB15,AtY19,AtMYB15,AtMYB15/AtY19/MYB15 (myb domain protein 15); DNA binding,AtMYB15/AtY19/MYB15 (myb domain protein 15); DNA binding / transcription factor
At1g72450	TIFY11B,JAZ6,unknown protein
At5g52010	zinc finger (C2H2 type) family protein
At4g17490	ATERF6,ATERF6 (ETHYLENE RESPONSIVE ELEMENT BINDING FACTOR 6); DNA binding / transcription factor
At1g50420	SCL3,SCL3 (SCARECROW-LIKE 3); transcription factor
At1g04240	SHY2,SHY2 (SHORT HYPOCOTYL 2); transcription factor
At4g34680	GATA transcription factor 3, putative (GATA-3)
At3g16857	ARR1,ARR1 (ARABIDOPSIS RESPONSE REGULATOR 1); transcription factor/ two-component response regulator
At4g15180	SET domain-containing protein
At1g32700	zinc-binding family protein
At3g19510	homeobox protein (HAT 3.1)
At3g51950	RNA binding,zinc finger (CCCH-type) family protein / RNA recognition motif (RRM)-containing protein
At1g56010	NAC1,NAC1 (Arabidopsis NAC domain containing protein 21, Arabidopsis NAC domain containing protein 22); transcription factor
At2g22300	ethylene-responsive calmodulin-binding protein, putative (SR1),unknown protein
At1g28050	zinc finger (B-box type) family protein
At3g02150	PTF1,PTF1 (PLASTID TRANSCRIPTION FACTOR 1); transcription factor
At2g28710	zinc finger (C2H2 type) family protein
At1g52150	ATHB-15,ATHB-15 (INCURVATA 4),ATHB-15 (INCURVATA 4); DNA binding / transcription factor
At5g57150	basic helix-loop-helix (bHLH) family protein
At5g45050	TTR1,TTR1 (WRKY domain family protein 16); transcription factor
At1g27730	STZ,STZ (SALT TOLERANCE ZINC FINGER); nucleic acid binding / transcription factor/ zinc ion binding
At3g61150	HDG1,HDG1 (HOMEODOMAIN GLABROUS1); DNA binding / transcription factor
At5g13220	TIFY9,JAZ10,JAS1,unknown protein
At1g08000	zinc finger (GATA type) family protein
At2g02740	PTAC11,ATWHY3,ATWHY3/PTAC11 (A. THALIANA WHIRLY 3),ATWHY3/PTAC11 (A. THALIANA WHIRLY 3); DNA binding
At5g43700	ATAUX2-11,ATAUX2-11 (indoleacetic acid-induced protein 4); transcription factor
At5g15210	ZFHD3,ATHB30,ATHB30/ZFHD3 (ZINC FINGER HOMEODOMAIN 3); DNA binding / transcription factor
At3g46600	scarecrow transcription factor family protein
At3g60390	HAT3,HAT3 (homeobox-leucine zipper protein 3); transcription factor
At2g33860	ETT,ETT (ETTIN); transcription factor
At5g37020	ARF8,ARF8 (AUXIN RESPONSE FACTOR 8),ARF8 (AUXIN RESPONSE FACTOR 8); transcription factor
At4g37610	BT5,BT5 (BTB and TAZ domain protein 5); protein binding / transcription regulator
At2g45190	AFO,AFO (ABNORMAL FLORAL ORGANS); transcription factor
At4g34610	BLH6,BLH6 (BELL1-LIKE HOMEODOMAIN 5); DNA binding / transcription factor,unknown protein
At5g39760	ATHB23,ATHB23 (ARABIDOPSIS THALIANA HOMEOBOX PROTEIN 23); DNA binding / transcription factor
At5g57180	CIA2,CIA2 (CHLOROPLAST IMPORT APPARATUS 2)
At1g28370	ERF11,ATERF11,ATERF11/ERF11 (ERF domain protein 11); DNA binding / transcription factor/ transcriptional repressor
At2g46400	WRKY46,WRKY46 (WRKY DNA-binding protein 46); transcription factor
At5g04760	myb family transcription factor
At1g34390	ARF22,ARF22 (AUXIN RESPONSE FACTOR 22); transcription factor
At3g04670	WRKY39,WRKY39 (WRKY DNA-binding protein 39); transcription factor
At5g64810	WRKY51,WRKY51 (WRKY DNA-binding protein 51); transcription factor
At3g61630	CRF6,CRF6 (CYTOKININ RESPONSE FACTOR 6); DNA binding / transcription factor
At5g22380	ANAC090,ANAC090 (Arabidopsis NAC domain containing protein 90); transcription factor
At3g23030	IAA2,IAA2 (indoleacetic acid-induced protein 2); transcription factor
At2g42300	DNA binding / transcription factor,basic helix-loop-helix (bHLH) family protein
At5g66320	zinc finger (GATA type) family protein
At3g58710	WRKY69,WRKY69 (WRKY DNA-binding protein 69); transcription factor
At3g46080	zinc finger (C2H2 type) family protein
At3g10500	ANAC053,ANAC053 (Arabidopsis NAC domain containing protein 53); transcription factor
At3g14230	RAP2.2,RAP2.2; DNA binding / transcription factor
At4g26640	WRKY20,WRKY20 (WRKY DNA-binding protein 20); transcription factor
At5g59450	scarecrow-like transcription factor 11 (SCL11)
At5g60850	OBP4,OBP4 (OBF BINDING PROTEIN 4); DNA binding / transcription factor
At5g23090	TATA-binding protein-associated phosphoprotein Dr1 protein, putative (DR1)
At4g18390	TCP family transcription factor, putative
At1g07520	scarecrow transcription factor family protein
At2g23760	BLH4,BLH4 (BLH4); DNA binding,BLH4 (BLH4); DNA binding / transcription factor
At1g68840	RAV2,RAV2 (REGULATOR OF THE ATPASE OF THE VACUOLAR MEMBRANE); DNA binding / transcription factor
At1g22070	TGA3,TGA3 (TGA1a-related gene 3); DNA binding / calmodulin binding / transcription factor
At3g19580	AZF2,AZF2 (ARABIDOPSIS ZINC-FINGER PROTEIN 2); nucleic acid binding / transcription factor/ zinc ion binding,unknown protein
At4g18880	AT-HSFA4A,AT-HSFA4A (Arabidopsis thaliana heat shock transcription factor A4A); DNA binding / transcription factor
At1g21000	unknown protein,zinc-binding family protein
At3g11200	PHD finger family protein
At3g20310	ERF7,ERF7 (ETHYLINE RESPONSE FACTOR7); DNA binding / protein binding / transcription factor/ transcriptional repressor
At1g19270	ubiquitin interaction motif-containing protein / LIM domain-containing protein
At1g21910	AP2 domain-containing transcription factor family protein
At5g01900	WRKY62,WRKY62 (WRKY DNA-binding protein 62); transcription factor
At5g04410	NAC2,NAC2 (Arabidopsis NAC domain containing protein 78); transcription factor
At1g59640	ZCW32,ZCW32 (BIGPETAL, BIGPETALUB); DNA binding / transcription factor
At2g46510	basic helix-loop-helix (bHLH) family protein
At2g42380	bZIP transcription factor family protein
At5g60410	SIZ1,ATSIZ1,ATSIZ1/SIZ1; DNA binding,ATSIZ1/SIZ1; DNA binding / SUMO ligase,unknown protein
At5g50570	squamosa promoter-binding protein, putative
At1g22590	AGL87,MADS-box family protein
At5g61600	ethylene-responsive element-binding family protein
At1g26260	DNA binding / transcription factor,basic helix-loop-helix (bHLH) family protein
At5g22220
At1g04250	AXR3,AXR3 (AUXIN RESISTANT 3); transcription factor
At5g61380	TOC1,TOC1 (TIMING OF CAB1 1); transcription regulator
At1g01720	ATAF1,ATAF1 (Arabidopsis NAC domain containing protein 2); transcription factor
At3g04730	IAA16,IAA16 (indoleacetic acid-induced protein 16); transcription factor
At3g17609	HYH,HYH (HY5-HOMOLOG),HYH (HY5-HOMOLOG); DNA binding / transcription factor
At5g59820	RHL41,RHL41 (RESPONSIVE TO HIGH LIGHT 41); nucleic acid binding / transcription factor/ zinc ion binding
At4g00730	ANL2,ANL2 (ANTHOCYANINLESS 2); transcription factor,unknown protein
At1g76590	zinc-binding family protein
At1g26310	CAL,CAL (CAULIFLOWER); DNA binding / transcription factor
At1g46480	homeobox-leucine zipper transcription factor family protein
At5g20730	NPH4,NPH4 (NON-PHOTOTROPHIC HYPOCOTYL); transcription factor
At1g53160	SPL4,SPL4 (SQUAMOSA PROMOTER BINDING PROTEIN-LIKE 4); DNA binding,SPL4 (SQUAMOSA PROMOTER BINDING PROTEIN-LIKE 4); DNA binding / transcription factor
At2g30432	TCL1,DNA binding
At4g37540	LBD39,LOB domain protein 39 / lateral organ boundaries domain protein 39 (LBD39)
At3g58120	bZIP transcription factor family protein
At5g67480	BT4,BT4 (BTB AND TAZ DOMAIN PROTEIN 4); protein binding,BT4 (BTB AND TAZ DOMAIN PROTEIN 4); protein binding / transcription regulator
At5g63420	EMB2746,EMB2746 (EMBRYO DEFECTIVE 2746); catalytic
At1g10200	WLIM1,transcription factor LIM, putative
At5g44180	homeobox transcription factor, putative
At4g17460	HAT1,HAT1 (homeobox-leucine zipper protein 1); DNA binding / transcription factor
At2g47890	zinc finger (B-box type) family protein
At2g28200	nucleic acid binding / transcription factor/ zinc ion binding
At5g61420	MYB28,MYB28 (myb domain protein 28); DNA binding / transcription factor
At5g28770	BZO2H3,BZO2H3 (basic leucine zipper O2 homolog 3); DNA binding / transcription factor
At3g57800	basic helix-loop-helix (bHLH) family protein
At1g25560	AP2 domain-containing transcription factor, putative
At5g44190	GLK2,GLK2 (GOLDEN2-LIKE 2); DNA binding / transcription factor
At2g17410	ARID/BRIGHT DNA-binding domain-containing protein
At2g37520	PHD finger family protein
At1g34190	ANAC017,ANAC017 (Arabidopsis NAC domain containing protein 17); transcription factor
At1g06070	bZIP transcription factor, putative (bZIP69)
At5g62430	CDF1,CDF1 (CYCLING DOF FACTOR 1); DNA binding / protein binding / transcription factor
At2g38470	WRKY33,WRKY33 (WRKY DNA-binding protein 33); transcription factor
At1g68520	zinc finger (B-box type) family protein
At5g08790	ATAF2,ATAF2 (Arabidopsis NAC domain containing protein 81)
At1g14350	FLP,FLP (FOUR LIPS),FLP (FOUR LIPS); DNA binding / transcription factor
At2g17040	ANAC036,ANAC036 (Arabidopsis NAC domain containing protein 36); transcription factor
At3g61890	ATHB-12,ATHB-12 (ARABIDOPSIS THALIANA HOMEOBOX PROTEIN 1); transcription factor
At1g72830	HAP2C,HAP2C (Heme activator protein (yeast) homolog 2C); transcription factor
At3g25730	AP2 domain-containing transcription factor, putative
At1g67970	AT-HSFA8,AT-HSFA8 (Arabidopsis thaliana heat shock transcription factor A8); DNA binding / transcription factor
At2g36930	zinc finger (C2H2 type) family protein
At4g13040	AP2 domain-containing transcription factor family protein
At1g22190	AP2 domain-containing transcription factor, putative
At5g63080	transcription factor jumonji (jmjC) domain-containing protein
At3g42790	PHD finger family protein
At1g49560	myb family transcription factor
At1g12860	basic helix-loop-helix (bHLH) family protein / F-box family protein
At1g33420	PHD finger family protein
At2g41240	BHLH100,basic helix-loop-helix (bHLH) family protein
At1g06160	ethylene-responsive factor, putative
At5g65210	TGA1,DNA binding / calmodulin binding / transcription factor,bZIP family transcription factor (TGA1)
At5g51980	WD-40 repeat family protein / zfwd2 protein (ZFWD2), putative,nucleic acid binding
At2g25180	ARR12,ARR12 (ARABIDOPSIS RESPONSE REGULATOR 12); transcription factor/ two-component response regulator
At1g11950	transcription factor jumonji (jmjC) domain-containing protein
At4g23810	WRKY53,WRKY53 (WRKY DNA-binding protein 53); transcription factor
At1g14580	zinc finger (C2H2 type) family protein
At4g02560	LD,LD (LUMINIDEPENDENS); transcription factor
At4g16780	ATHB-2,ATHB-2 (Homeobox-leucine zipper protein HAT4); DNA binding / transcription factor
At5g46710	zinc-binding family protein
At1g74930	AP2 domain-containing transcription factor, putative
At3g49940	LBD38,LOB domain protein 38 / lateral organ boundaries domain protein 38 (LBD38)
At5g24590	TIP,TIP (TCV-INTERACTING PROTEIN); transcription factor
At4g01060	ETC3,DNA binding / transcription factor,myb family transcription factor
At4g16430	basic helix-loop-helix (bHLH) family protein
At1g78080	RAP2.4,RAP2.4 (related to AP2 4); DNA binding / transcription factor
At5g22260	MS1,MS1 (MALE STERILITY 1); DNA binding
At2g26580	YAB5,plant-specific transcription factor YABBY family protein
At4g31800	WRKY18,WRKY18 (WRKY DNA-binding protein 18); transcription factor
At3g04930	transcription regulator
At5g17890	LIM domain-containing protein / disease resistance protein-related
At4g39780	AP2 domain-containing transcription factor, putative
At5g24800	BZO2H2,BZO2H2 (basic leucine zipper O2 homolog 2); DNA binding / transcription factor
At4g21750	ATML1,ATML1 (MERISTEM LAYER 1); DNA binding,ATML1 (MERISTEM LAYER 1); DNA binding / transcription factor
At1g60040	AGL49,MADS-box family protein
At4g27410	RD26,RD26 (RESPONSIVE TO DESSICATION 26),RD26 (RESPONSIVE TO DESSICATION 26); transcription factor
At5g63790	ANAC102,ANAC102 (Arabidopsis NAC domain containing protein 102); transcription factor
At2g27470	CCAAT-box binding transcription factor subunit HAP3-related
At4g17900	zinc-binding family protein
At3g11580	DNA-binding protein, putative
At3g49530	ANAC062,ANAC062 (Arabidopsis NAC domain containing protein 62); transcription factor
At5g67300	MYBR1,AtMYBr1,AtMYB44,AtMYB44/AtMYBr1 (myb domain protein 44, myb domain protein r1); DNA binding / transcription factor
At4g09460	ATMYB6,ATMYB6 (myb domain protein 6, myb domain protein 8); DNA binding / transcription factor
At3g57390	AGL18,AGL18 (AGAMOUS-LIKE 18); transcription factor
At5g67450	AZF1,AZF1 (ARABIDOPSIS ZINC-FINGER PROTEIN 1); nucleic acid binding / transcription factor/ zinc ion binding
At4g00180	YAB3,YAB3 (YABBY3),YAB3 (YABBY3); transcription factor
At4g17500	ATERF-1,ATERF-1 (ETHYLENE RESPONSIVE ELEMENT BINDING FACTOR 1); DNA binding / transcription factor/ transcriptional activator
At3g50260	CEJ1,ATERF#011,ATERF#011/CEJ1 (COOPERATIVELY REGULATED BY ETHYLENE AND JASMONATE 1); DNA binding / transcription factor
At4g00050	UNE10,UNE10 (unfertilized embryo sac 10); DNA binding / transcription factor
At1g21450	SCL1,SCL1 (SCARECROW-LIKE 1); transcription factor
At1g26960	ATHB23,ATHB23 (ARABIDOPSIS THALIANA HOMEOBOX PROTEIN 23); DNA binding / transcription factor
At3g25990	DNA-binding protein GT-1-related
At5g04340	C2H2,C2H2; nucleic acid binding / transcription factor/ zinc ion binding
At4g01250	WRKY22,WRKY22 (WRKY DNA-binding protein 22); transcription factor
At2g39900	LIM domain-containing protein
At1g27050	ATHB54,ATHB54 (ARABIDOPSIS THALIANA HOMEOBOX PROTEIN 54); nucleic acid binding / transcription factor
At2g36080	DNA-binding protein, putative
At5g51190	AP2 domain-containing transcription factor, putative
At5g61190	zinc finger protein-related
At4g30080	ARF16,ARF16 (AUXIN RESPONSE FACTOR 16); miRNA binding / transcription factor
At3g57480	zinc finger (C2H2 type, AN1-like) family protein
At5g08330	TCP family transcription factor, putative
At5g09790	ATXR5,ATXR5 (Trithorax- related protein 5),ATXR5 (Trithorax- related protein 5); DNA binding
At5g47230	ERF5,ERF5 (ETHYLENE RESPONSIVE ELEMENT BINDING FACTOR 5); DNA binding / transcription factor/ transcriptional activator
At1g51700	ADOF1,ADOF1 (Arabidopsis dof zinc finger protein 1); DNA binding / transcription factor
At3g46090	ZAT7,ZAT7; nucleic acid binding / transcription factor/ zinc ion binding
At1g20980	SPL14,SPL14 (SQUAMOSA PROMOTER BINDING PROTEIN-LIKE 14); DNA binding / transcription factor
At3g12730	myb family transcription factor
At1g70700	TIFY7,JAZ9,unknown protein
At5g45420	myb family transcription factor
At1g18570	MYB51,MYB51 (myb domain protein 51); DNA binding / transcription factor
At4g25470	CBF2,CBF2 (FREEZING TOLERANCE QTL 4); DNA binding / transcription factor/ transcriptional activator
At2g30250	WRKY25,WRKY25 (WRKY DNA-binding protein 25); transcription factor
At5g06770	KH domain-containing protein / zinc finger (CCCH type) family protein
At2g35940	BLH1,BLH1 (BLH1),BLH1 (BLH1); DNA binding / transcription factor,BLH1 (BLH1); transcription factor
At1g67310	calmodulin binding / transcription regulator
At5g23405	high mobility group (HMG1/2) family protein
At5g04240	ELF6,ELF6 (EARLY FLOWERING 6); transcription factor
At5g26170	WRKY50,WRKY50 (WRKY DNA-binding protein 50); transcription factor
At4g02640	BZO2H1,BZO2H1 (basic leucine zipper O2 homolog 1); DNA binding / sequence-specific DNA binding / transcription factor,BZO2H1 (basic leucine zipper O2 homolog 1); DNA binding / transcription factor
At1g23380	KNAT6,KNAT6 (Knotted-like Arabidopsis thaliana 6); DNA binding / transcription factor
At1g56170	HAP5B,HAP5B (Heme activator protein (yeast) homolog 5B),HAP5B (Heme activator protein (yeast) homolog 5B); DNA binding / transcription factor
At1g19180	TIFY10A,JAZ1,unknown protein
At2g42680	MBF1A,ATMBF1A,ATMBF1A/MBF1A (MULTIPROTEIN BRIDGING FACTOR 1A); DNA binding / transcription coactivator
At4g29190	zinc finger (CCCH-type) family protein
At2g33480	ANAC041,ANAC041 (Arabidopsis NAC domain containing protein 41); transcription factor,unknown protein
At2g30590	WRKY21,WRKY21 (WRKY DNA-binding protein 21); transcription factor
At3g11280	myb family transcription factor
At1g52880	NAM,NAM (Arabidopsis NAC domain containing protein 18); transcription factor
At4g32980	ATH1,ATH1 (ARABIDOPSIS THALIANA HOMEOBOX GENE 1); transcription factor
At1g49130	zinc finger (B-box type) family protein,zinc ion binding
At3g29035	ATNAC3,ANAC059,ANAC059/ATNAC3 (Arabidopsis NAC domain containing protein 59); protein heterodimerization/ transcription factor
At2g44840	EREBP,ATERF13,ATERF13/EREBP (ETHYLENE-RESPONSIVE ELEMENT BINDING FACTOR 13); DNA binding / transcription factor
At1g74950	TIFY10B,JAZ2,unknown protein
At4g29080	PAP2,PAP2 (PHYTOCHROME-ASSOCIATED PROTEIN 2); transcription factor
At5g38140	histone-like transcription factor (CBF/NF-Y) family protein
At4g17570	zinc finger (GATA type) family protein
At2g33310	IAA13,IAA13 (indoleacetic acid-induced protein 13); transcription factor,unknown protein
At1g32640	ATMYC2,ATMYC2 (JASMONATE INSENSITIVE 1); DNA binding / transcription factor
At2g42660	myb family transcription factor
At5g23420	HMGB6,HMGB6 (High mobility group B 6); transcription factor
At5g04150	BHLH101,basic helix-loop-helix (bHLH) family protein
At3g61970	NGA2,NGA2 (NGATHA2); transcription factor
At5g22570	WRKY38,WRKY38 (WRKY DNA-binding protein 38); transcription factor
At1g29160	Dof-type zinc finger domain-containing protein
At4g24020	RWP-RK domain-containing protein
At5g65410	ZFHD2,ATHB25,ATHB25/ZFHD2 (ZINC FINGER HOMEODOMAIN 2); DNA binding / transcription factor
At3g10800	BZIP28,bZIP transcription factor family protein
At2g33810	SPL3,SPL3 (SQUAMOSA PROMOTER BINDING PROTEIN-LIKE 3); transcription factor
At2g46530	ARF11,ARF11 (AUXIN RESPONSE FACTOR 11); transcription factor
At3g55980	zinc finger (CCCH-type) family protein
At5g62470	MYB96,MYB96 (myb domain protein 96); DNA binding / transcription factor
At2g23320	WRKY15,WRKY15 (WRKY DNA-binding protein 15); transcription factor
At1g80840	WRKY40,WRKY40 (WRKY DNA-binding protein 40); transcription factor
At5g13180	ANAC083,ANAC083 (Arabidopsis NAC domain containing protein 83); transcription factor
At5g53660	AtGRF7,AtGRF7 (GROWTH-REGULATING FACTOR 7)
At3g15270	SPL5,SPL5 (SQUAMOSA PROMOTER BINDING PROTEIN-LIKE 5); DNA binding / transcription factor
At5g62610	basic helix-loop-helix (bHLH) family protein
At3g07650	COL9,COL9 (CONSTANS-LIKE 9); transcription factor/ zinc ion binding,COL9 (CONSTANS-LIKE 9); zinc ion binding,unknown protein
At3g54620	BZO2H4,BZO2H4 (basic leucine zipper O2 homolog 4); transcription factor,unknown protein
At3g23050	IAA7,IAA7 (AUXIN RESISTANT 2),IAA7 (AUXIN RESISTANT 2); transcription factor
At1g52830	IAA6,IAA6 (indoleacetic acid-induced protein 6); transcription factor
At2g40140	ZFAR1,CZF1,CZF1/ZFAR1,CZF1/ZFAR1; transcription factor
At4g27330	SPL,SPL (SPOROCYTELESS)
At5g29000	myb family transcription factor,unknown protein
At1g42990	ATBZIP60,ATBZIP60 (BASIC REGION/LEUCINE ZIPPER MOTIF 60); DNA binding / transcription factor
At5g13080	WRKY75,WRKY75 (WRKY DNA-binding protein 75); transcription factor
At1g77920	bZIP family transcription factor
At2g18160	GBF5,ATBZIP2,GBF5 (G-box binding factor 5); DNA binding / transcription factor
At3g15030	TCP4,TCP4 (TCP family transcription factor 4, maternal effect embryo arrest 35); transcription factor
At2g41710	ovule development protein, putative
At5g06960	OBF5,OBF5 (OCS-ELEMENT BINDING FACTOR 5); DNA binding / transcription factor
At5g47140	zinc finger (GATA type) family protein
At1g25550	myb family transcription factor
At5g62000	ARF2,ARF2 (AUXIN RESPONSE FACTOR 2),ARF2 (AUXIN RESPONSE FACTOR 2); transcription factor
At5g54070	AT-HSFA9,AT-HSFA9 (Arabidopsis thaliana heat shock transcription factor A9); DNA binding / transcription factor
At4g01580	transcriptional factor B3 family protein
At2g41900	zinc finger (CCCH-type) family protein
At1g07530	scarecrow-like transcription factor 14 (SCL14)
At3g09735	DNA-binding S1FA family protein
At1g32150	bZIP transcription factor family protein
At1g62300	WRKY6,WRKY6 (WRKY DNA-binding protein 6); transcription factor
At3g06380	ATTLP9,ATTLP9/AtTLP9 (TUBBY LIKE PROTEIN 9, TUBBY-LIKE PROTEIN 9); phosphoric diester hydrolase/ protein binding / transcription factor
At4g36990	HSF4,HSF4 (HEAT SHOCK FACTOR 4); DNA binding / transcription factor
At1g13260	RAV1,RAV1 (Related to ABI3/VP1 1); DNA binding / transcription factor
At5g49450	ATBZIP1,bZIP family transcription factor
At5g50670	squamosa promoter-binding protein, putative
At5g43270	SPL2,SPL2 (SQUAMOSA PROMOTER BINDING PROTEIN-LIKE 2); DNA binding,SPL2 (SQUAMOSA PROMOTER BINDING PROTEIN-LIKE 2); DNA binding / transcription factor
At1g76710	SDG26,ASHH1,SET domain-containing protein (ASHH1)
At4g17230	SCL13,SCL13 (SCARECROW-LIKE 13); transcription factor
At4g25490	CBF1,CBF1 (C-REPEAT/DRE BINDING FACTOR 1); DNA binding / transcription factor/ transcriptional activator
At5g08520	myb family transcription factor
At5g07690	MYB29,MYB29 (myb domain protein 29); DNA binding / transcription factor
At2g41835	zinc finger (C2H2 type, AN1-like) family protein
At1g57560	AtMYB50,AtMYB50 (myb domain protein 50); DNA binding / transcription factor
At5g47220	ERF2,ATERF2,ATERF-2,ATERF-2/ATERF2/ERF2 (ETHYLENE RESPONSE FACTOR 2); DNA binding / transcription factor/ transcriptional activator
At2g16720	MYB7,MYB7 (myb domain protein 7); DNA binding / transcription factor
At1g75410	BLH3,BLH3 (BLH3),BLH3 (BLH3); DNA binding / transcription factor
At1g69490	NAP,NAP (NAC-LIKE, ACTIVATED BY AP3/PI); transcription factor
At1g55110	ATIDD7,ARABIDOPSIS THALIANA INDETERMINATE(ID)-DOMAIN 7/ATIDD7; nucleic acid binding / transcription factor/ zinc ion binding
At3g11450	DNAJ heat shock N-terminal domain-containing protein / cell division protein-related
At5g61590	AP2 domain-containing transcription factor family protein
At5g67420	LBD37,LOB domain protein 37 / lateral organ boundaries domain protein 37 (LBD37)
At5g07100	WRKY26,WRKY26 (WRKY DNA-binding protein 26); transcription factor
At1g14410	PTAC1,ATWHY1,ATWHY1/PTAC1 (A. THALIANA WHIRLY 1, PLASTID TRANSCRIPTIONALLY ACTIVE1); DNA binding
At5g28040	transcription regulator
At3g50060	MYB77,myb family transcription factor
At3g54220	SCR,SCR (SCARECROW); transcription factor
At1g14030	ribulose-1,5 bisphosphate carboxylase oxygenase large subunit N-methyltransferase, putative
At2g46810	basic helix-loop-helix (bHLH) family protein
At2g01060	myb family transcription factor
At4g37790	HAT22,HAT22 (homeobox-leucine zipper protein 22); transcription factor
At1g53170	ATERF8,ATERF-8,ATERF-8/ATERF8 (ETHYLENE RESPONSE ELEMENT BINDING FACTOR 4); DNA binding / transcription factor/ transcriptional repressor
At3g15210	RAP2.5,ERF4,ATERF4,ATERF-4,ATERF-4/ATERF4/ERF4/RAP2.5 (ETHYLENE RESPONSIVE ELEMENT BINDING FACTOR 4); DNA binding / protein binding / transcription factor/ transcriptional repressor
