# Supplementary material for: Molecular Signatures in Arabidopsis thaliana in Response to Insect Attack and Bacterial Infection
Source: PLOS journal article supplement (doi:10.1371/journal.pone.0058987), 2013-03-25
Supplement: S1 (10.1371/journal.pone.0058987.s001) [file journal.pone.0058987.s001]

Archive with 8 entries (8 files):
- CytoscapeSession-2011_06_01-13_25/ClueGO Results for Analysis0 (Kappa30.3).xgmml
- CytoscapeSession-2011_06_01-13_25/cysession.xml
- CytoscapeSession-2011_06_01-13_25/session_vizmap.props
- CytoscapeSession-2011_06_01-13_25/session_cytoscape.props
- CytoscapeSession-2011_06_01-13_25/session_bookmarks.xml
- CytoscapeSession-2011_06_01-13_25/plugins/CsFilter/old_filters.props
- CytoscapeSession-2011_06_01-13_25/plugins/FilterPlugin/session_filters.props
- CytoscapeSession-2011_06_01-13_25/plugins/AttributeBrowserPlugin/attributeBrowser.props
