# Supplementary material for: Molecular Signatures in Arabidopsis thaliana in Response to Insect Attack and Bacterial Infection
Source: PLOS journal article supplement (doi:10.1371/journal.pone.0058987), 2013-03-25
Supplement: S1 (10.1371/journal.pone.0058987.s001) [file journal.pone.0058987.s001 › CytoscapeSession-2011_06_01-13_25/ClueGO Results for Analysis0 (Kappa30.3).xgmml]

<?xml version="1.0" encoding="UTF-8" standalone="yes"?>
<graph label="ClueGO Results for Analysis0 (Kappa:0.3)" xmlns:dc="http://purl.org/dc/elements/1.1/" xmlns:xlink="http://www.w3.org/1999/xlink" xmlns:rdf="http://www.w3.org/1999/02/22-rdf-syntax-ns#" xmlns:cy="http://www.cytoscape.org" xmlns="http://www.cs.rpi.edu/XGMML"  directed="1">
  <att name="documentVersion" value="1.1"/>
  <att name="networkMetadata">
    <rdf:RDF>
      <rdf:Description rdf:about="http://www.cytoscape.org/">
        <dc:type>Protein-Protein Interaction</dc:type>
        <dc:description>N/A</dc:description>
        <dc:identifier>N/A</dc:identifier>
        <dc:date>2011-06-01 13:25:15</dc:date>
        <dc:title>ClueGO Results for Analysis0 (Kappa:0.3)</dc:title>
        <dc:source>http://www.cytoscape.org/</dc:source>
        <dc:format>Cytoscape-XGMML</dc:format>
      </rdf:Description>
    </rdf:RDF>
  </att>
  <att type="string" name="backgroundColor" value="#ffffff"/>
  <att type="real" name="GRAPH_VIEW_ZOOM" value="0.46221412366469755"/>
  <att type="real" name="GRAPH_VIEW_CENTER_X" value="790.1040199405157"/>
  <att type="real" name="GRAPH_VIEW_CENTER_Y" value="1001.8409525501163"/>
  <att type="string" name="__layoutAlgorithm" value="grid" cy:hidden="true"/>
  <node label="GO:00801340" id="-225">
    <att type="real" name="% Associated Genes0" value="6.593406677246094"/>
    <att type="string" name="All Associated Genes0" value="[ABCG36, ASHH2, AT1G02450, AT1G33520, AT1G43700, AT1G74710, AT1G80680, AT1G80840, AT2G18790, AT2G18950, AT2G22330, AT2G25000, AT2G33835, AT2G39940, AT2G43790, AT3G15210, AT3G18690, AT3G26830, AT3G45640, AT3G61190, AT4G11260, AT4G12720, AT4G15900, AT4G18470, AT4G24540, AT4G25230, AT4G31800, AT4G37000, AT4G39030, AT4g22300, AT5G13220, AT5G23570, AT5G35620, AT5G40990, AT5G47220, AT5G51450, AT5G59890, AT5G60410, AT5G65050, ATMKK3, ATRAD17, At1g25540, At1g71220, At1g77470, At2g25620, At3g05360, At3g05480, At3g13226, At4g16990, At4g37460/F6G17_110, At5g09230, At5g18200, At5g22330, At5g48380, BT2, CALS12, CPR30, CRT3, EFR, EIN2, F14G92, F22O6_190, F24J70, FMO1, GH32, ILL5, ILL6, INO80, JAR1, KIN11, MLO2, MOS4, PBA1, PMRT15, PYK10, RAP1, RHA2A, RIN4, RPS4, SAS1, SGT1A, SOBIR1, SPX3, SYP121, SYP122, VTE1, WRKY53, WRKY54, WRKY58, WRKY70, erd2]"/>
    <att type="string" name="Associated Genes Found0" value="[AT1G02450, AT2G22330, AT3G26830, AT3G45640, AT4G31800, AT5G13220]"/>
    <att type="string" name="GOGroups0" value="[Group11, Group15]"/>
    <att type="string" name="GOID0" value="GO:0080134"/>
    <att type="string" name="GOLevels0" value="[4]"/>
    <att type="string" name="GOTerm0" value="regulation of response to stress"/>
    <att type="string" name="Group PValue Corrected with Bonferroni0" value="{Group11=1.5686285002411636E-22, Group15=7.871587599059506E-7}"/>
    <att type="string" name="Group PValue0" value="{Group11=9.227226472006844E-24, Group15=4.6303456465055917E-8}"/>
    <att type="integer" name="Nr. Genes0" value="6"/>
    <att type="string" name="Ontology Source0" value="GO_BiologicalProcess_05.05.2011_16h22"/>
    <att type="string" name="OverViewTerm0" value="FALSE"/>
    <att type="real" name="Term PValue Corrected with Bonferroni0" value="0.2287518573147004"/>
    <att type="real" name="Term PValue0" value="0.0015352473645281906"/>
    <att type="string" name="canonicalName" value="GO:00801340"/>
    <graphics type="ELLIPSE" h="30.000244140625" w="30.0" x="1000.0" y="1067.0" fill="#02068d" width="1" outline="#000000"/>
  </node>
  <node label="GO:00723290" id="-224">
    <att type="real" name="% Associated Genes0" value="12.0"/>
    <att type="string" name="All Associated Genes0" value="[AT1G03000, AT1G06290, AT1G79810, AT2G26350, AT3G07560, AT3G51840, AT4G16760, AT5G25760, AT5G65110, At1g65520, At3g01420/T13O15, At3g05290, At3g21780, At5g27520, At5g42890, At5g43280, CYP707A3, ECH2, MFP2, PAL1, PED1, PEX1, PEX12, dl3255c, dl3260c]"/>
    <att type="string" name="Associated Genes Found0" value="[AT3G51840, AT4G16760, AT5G65110]"/>
    <att type="string" name="GOGroups0" value="[Group11, Group2]"/>
    <att type="string" name="GOID0" value="GO:0072329"/>
    <att type="string" name="GOLevels0" value="[6, 7]"/>
    <att type="string" name="GOTerm0" value="monocarboxylic acid catabolic process"/>
    <att type="string" name="Group PValue Corrected with Bonferroni0" value="{Group11=1.5686285002411636E-22, Group2=2.667419925045739E-10}"/>
    <att type="string" name="Group PValue0" value="{Group11=9.227226472006844E-24, Group2=1.5690705441445522E-11}"/>
    <att type="integer" name="Nr. Genes0" value="3"/>
    <att type="string" name="Ontology Source0" value="GO_BiologicalProcess_05.05.2011_16h22"/>
    <att type="string" name="OverViewTerm0" value="FALSE"/>
    <att type="real" name="Term PValue Corrected with Bonferroni0" value="0.6882696613796265"/>
    <att type="real" name="Term PValue0" value="0.004619259472346487"/>
    <att type="string" name="canonicalName" value="GO:00723290"/>
    <graphics type="ELLIPSE" h="30.0" w="30.0" x="604.0" y="650.0" fill="#02068d" width="1" outline="#000000"/>
  </node>
  <node label="GO:00716950" id="-223">
    <att type="real" name="% Associated Genes0" value="22.22222137451172"/>
    <att type="string" name="All Associated Genes0" value="[AT1G01480, AT1G05010, AT2G22810, AT3G49700, AT4G08040, AT4G11280, AT4G26200, AT4G37770, AT5G65800]"/>
    <att type="string" name="Associated Genes Found0" value="[AT1G05010, AT4G11280]"/>
    <att type="string" name="GOGroups0" value="[Group8]"/>
    <att type="string" name="GOID0" value="GO:0071695"/>
    <att type="string" name="GOLevels0" value="[3]"/>
    <att type="string" name="GOTerm0" value="anatomical structure maturation"/>
    <att type="string" name="Group PValue Corrected with Bonferroni0" value="{Group8=1.9149650656212817E-4}"/>
    <att type="string" name="Group PValue0" value="{Group8=1.126450038600754E-5}"/>
    <att type="integer" name="Nr. Genes0" value="2"/>
    <att type="string" name="Ontology Source0" value="GO_BiologicalProcess_05.05.2011_16h22"/>
    <att type="string" name="OverViewTerm0" value="FALSE"/>
    <att type="real" name="Term PValue Corrected with Bonferroni0" value="0.9332553429838425"/>
    <att type="real" name="Term PValue0" value="0.006263458677743909"/>
    <att type="string" name="canonicalName" value="GO:00716950"/>
    <graphics type="ELLIPSE" h="30.0" w="30.0" x="1843.0" y="1418.0" fill="#8bac27" width="1" outline="#000000"/>
  </node>
  <node label="GO:00714960" id="-222">
    <att type="real" name="% Associated Genes0" value="4.0"/>
    <att type="string" name="All Associated Genes0" value="[AT1G27320, AT1G43700, AT1G55920, AT1G79050, AT2G11810, AT2G19590, AT2G33770, AT2G45170, AT3G04530, AT3G06190, AT3G16785, AT3G23430, AT3G47340, AT3G62980, AT4G00550, AT4G03190, AT4G33030, AT4g04955, AT5G20410, AT5G60410, AT5G61420, ATG12A, ATG12B, ATL31, ATR1, At1g05680, At1g09020, At1g13300, At1g23010/F19G10_5, At1g29395/F15D2_29, At1g54210, At1g68320, At2g21410, At2g22240, At3g03250, At3g03520, At3g08860, At3g09922, At3g18290, At3g27740, At3g55880, At3g61710, At4g39080, At5g07690, At5g21040, At5g23630, At5g26880, At5g42870, At5g45380, At5g48850, BGLU21, BHLH32, BHLH47, BOR4, BPM1, BPM4, BPM5, CARB, CAT1, CAT2, CHIB1, CIPK9, COR413-PM1, CYS1, DOR, F11F8_14, GLR3, GPX3, GTE10, GTL1, KINB1, NIP5-1, NIP6-1, NIT3, PAP12, PCKA, PHF1, PHO1-H1, PHT1-1, PHT1-2, PLDEPSILON, PLDP2, PS2, PYD1A, PYD2, PYD3, PYRB, PYRE-F, RECQL1, RECQL5, RTY/SUR1, SPX2, SPX3, SULTR1, T21P5, TTL, UPP, WOL, WRKY6, gst8]"/>
    <att type="string" name="Associated Genes Found0" value="[AT2G33770, AT2G45170, AT3G16785, AT3G47340]"/>
    <att type="string" name="GOGroups0" value="[Group1, Group4]"/>
    <att type="string" name="GOID0" value="GO:0071496"/>
    <att type="string" name="GOLevels0" value="[3]"/>
    <att type="string" name="GOTerm0" value="cellular response to external stimulus"/>
    <att type="string" name="Group PValue Corrected with Bonferroni0" value="{Group1=0.11288642812032629, Group4=0.0036532098882545404}"/>
    <att type="string" name="Group PValue0" value="{Group1=0.0066403781247250755, Group4=2.1489469930909062E-4}"/>
    <att type="integer" name="Nr. Genes0" value="4"/>
    <att type="string" name="Ontology Source0" value="GO_BiologicalProcess_05.05.2011_16h22"/>
    <att type="string" name="OverViewTerm0" value="FALSE"/>
    <att type="real" name="Term PValue Corrected with Bonferroni0" value="1.0"/>
    <att type="real" name="Term PValue0" value="0.04804912742663853"/>
    <att type="string" name="canonicalName" value="GO:00714960"/>
    <graphics type="ELLIPSE" h="30.0" w="30.000011444091797" x="3.8892860412597656" y="1194.15869140625" fill="#1cf83d" width="1" outline="#000000"/>
  </node>
  <node label="GO:00713980" id="-221">
    <att type="real" name="% Associated Genes0" value="50.0"/>
    <att type="string" name="All Associated Genes0" value="[AT1G05010, AT1G62380, AT2G19590, At1g12010]"/>
    <att type="string" name="Associated Genes Found0" value="[AT1G05010, AT1G62380]"/>
    <att type="string" name="GOGroups0" value="[Group8]"/>
    <att type="string" name="GOID0" value="GO:0071398"/>
    <att type="string" name="GOLevels0" value="[6]"/>
    <att type="string" name="GOTerm0" value="cellular response to fatty acid"/>
    <att type="string" name="Group PValue Corrected with Bonferroni0" value="{Group8=1.9149650656212817E-4}"/>
    <att type="string" name="Group PValue0" value="{Group8=1.126450038600754E-5}"/>
    <att type="integer" name="Nr. Genes0" value="2"/>
    <att type="string" name="Ontology Source0" value="GO_BiologicalProcess_05.05.2011_16h22"/>
    <att type="string" name="OverViewTerm0" value="FALSE"/>
    <att type="real" name="Term PValue Corrected with Bonferroni0" value="0.16271798494051143"/>
    <att type="real" name="Term PValue0" value="0.0010920670130235666"/>
    <att type="string" name="canonicalName" value="GO:00713980"/>
    <graphics type="ELLIPSE" h="30.0" w="30.0" x="1823.0" y="1285.0" fill="#8bac27" width="1" outline="#000000"/>
  </node>
  <node label="GO:00713960" id="-220">
    <att type="real" name="% Associated Genes0" value="50.0"/>
    <att type="string" name="All Associated Genes0" value="[AT1G05010, AT1G62380, AT2G19590, At1g12010]"/>
    <att type="string" name="Associated Genes Found0" value="[AT1G05010, AT1G62380]"/>
    <att type="string" name="GOGroups0" value="[Group8]"/>
    <att type="string" name="GOID0" value="GO:0071396"/>
    <att type="string" name="GOLevels0" value="[5]"/>
    <att type="string" name="GOTerm0" value="cellular response to lipid"/>
    <att type="string" name="Group PValue Corrected with Bonferroni0" value="{Group8=1.9149650656212817E-4}"/>
    <att type="string" name="Group PValue0" value="{Group8=1.126450038600754E-5}"/>
    <att type="integer" name="Nr. Genes0" value="2"/>
    <att type="string" name="Ontology Source0" value="GO_BiologicalProcess_05.05.2011_16h22"/>
    <att type="string" name="OverViewTerm0" value="FALSE"/>
    <att type="real" name="Term PValue Corrected with Bonferroni0" value="0.16271798494051143"/>
    <att type="real" name="Term PValue0" value="0.0010920670130235666"/>
    <att type="string" name="canonicalName" value="GO:00713960"/>
    <graphics type="ELLIPSE" h="30.0" w="30.0" x="1780.0" y="1238.0" fill="#8bac27" width="1" outline="#000000"/>
  </node>
  <node label="GO:00713950" id="-219">
    <att type="real" name="% Associated Genes0" value="4.651162624359131"/>
    <att type="string" name="All Associated Genes0" value="[AFPH2, AT1G14920, AT1G15750, AT1G17440, AT1G19180, AT1G66350, AT2G01570, AT2G18790, AT2G39940, AT2G43790, AT3G03450, AT3G15210, AT3G27810, AT3G50660, AT4G01370, AT4G02570, AT4G11260, AT5G40350, AT5G47220, AT5G60410, ATMKK3, At1g25540, At1g32230, At1g53130, At2g44050, At3g01530/F4P13_8, At5g11270, CESA4, ERF1B, GB1, GRXC9, IRX1, JAR1, LECRKS2, NAC055, RNS1, SYP121, SYP122, THI2, TIFY6B, WRKY50, WRKY51, WRKY70]"/>
    <att type="string" name="Associated Genes Found0" value="[AT1G15750, AT1G19180]"/>
    <att type="string" name="GOGroups0" value="[Group15]"/>
    <att type="string" name="GOID0" value="GO:0071395"/>
    <att type="string" name="GOLevels0" value="[4, 5]"/>
    <att type="string" name="GOTerm0" value="cellular response to jasmonic acid stimulus"/>
    <att type="string" name="Group PValue Corrected with Bonferroni0" value="{Group15=7.871587599059506E-7}"/>
    <att type="string" name="Group PValue0" value="{Group15=4.6303456465055917E-8}"/>
    <att type="integer" name="Nr. Genes0" value="2"/>
    <att type="string" name="Ontology Source0" value="GO_BiologicalProcess_05.05.2011_16h22"/>
    <att type="string" name="OverViewTerm0" value="FALSE"/>
    <att type="real" name="Term PValue Corrected with Bonferroni0" value="1.0"/>
    <att type="real" name="Term PValue0" value="0.11640474762815994"/>
    <att type="string" name="canonicalName" value="GO:00713950"/>
    <graphics type="ELLIPSE" h="30.0" w="30.0" x="1272.4527587890625" y="1461.2125244140625" fill="#9c0e2d" width="1" outline="#000000"/>
  </node>
  <node label="GO:00713220" id="-217">
    <att type="real" name="% Associated Genes0" value="5.882352828979492"/>
    <att type="string" name="All Associated Genes0" value="[ASL2, AT1G05630, AT1G16540, AT1G27320, AT1G45249, AT1G52340, AT1G56650, AT1G66340, AT1G76030, AT1G78580, AT2G19860, AT2G36270, AT2G40220, AT3G20770, AT3G51770, AT4G02060, AT4G15900, AT5G03730, AT5G45830, AT5G46210, AT5G64930, At3g26090, At5g67030, BT2, EIN2, GATA21, HXK1, KIN10, LBA1, PSB29, RPT5B, SIS3, SR45, WOL]"/>
    <att type="string" name="Associated Genes Found0" value="[AT1G78580, AT2G19860]"/>
    <att type="string" name="GOGroups0" value="[Group3, Group4]"/>
    <att type="string" name="GOID0" value="GO:0071322"/>
    <att type="string" name="GOLevels0" value="[5]"/>
    <att type="string" name="GOTerm0" value="cellular response to carbohydrate stimulus"/>
    <att type="string" name="Group PValue Corrected with Bonferroni0" value="{Group3=1.4156565253701234E-4, Group4=0.0036532098882545404}"/>
    <att type="string" name="Group PValue0" value="{Group3=8.327391325706609E-6, Group4=2.1489469930909062E-4}"/>
    <att type="integer" name="Nr. Genes0" value="2"/>
    <att type="string" name="Ontology Source0" value="GO_BiologicalProcess_05.05.2011_16h22"/>
    <att type="string" name="OverViewTerm0" value="FALSE"/>
    <att type="real" name="Term PValue Corrected with Bonferroni0" value="1.0"/>
    <att type="real" name="Term PValue0" value="0.07819999590690961"/>
    <att type="string" name="canonicalName" value="GO:00713220"/>
    <graphics type="ELLIPSE" h="30.0" w="30.0" x="341.6025695800781" y="1554.4267578125" fill="#98e702" width="1" outline="#000000"/>
  </node>
  <node label="GO:00712810" id="-216">
    <att type="real" name="% Associated Genes0" value="7.142857074737549"/>
    <att type="string" name="All Associated Genes0" value="[AT1G62380, AT1G66340, AT2G19590, AT2G22810, AT3G20770, AT3G49700, AT3G53280, AT4G11280, AT5G03730, At1g21140, At1g76800, At2g05830, At3g25190, At5g38820, At5g55620, BGLU42, EIL1, EIL3, EIN2, F14G92, FIT, FRD3, IRT1, MTK, NAS1, NAS2, SAM1, SAM2]"/>
    <att type="string" name="Associated Genes Found0" value="[AT1G62380, AT4G11280]"/>
    <att type="string" name="GOGroups0" value="[Group8]"/>
    <att type="string" name="GOID0" value="GO:0071281"/>
    <att type="string" name="GOLevels0" value="[6]"/>
    <att type="string" name="GOTerm0" value="cellular response to iron ion"/>
    <att type="string" name="Group PValue Corrected with Bonferroni0" value="{Group8=1.9149650656212817E-4}"/>
    <att type="string" name="Group PValue0" value="{Group8=1.126450038600754E-5}"/>
    <att type="integer" name="Nr. Genes0" value="2"/>
    <att type="string" name="Ontology Source0" value="GO_BiologicalProcess_05.05.2011_16h22"/>
    <att type="string" name="OverViewTerm0" value="FALSE"/>
    <att type="real" name="Term PValue Corrected with Bonferroni0" value="1.0"/>
    <att type="real" name="Term PValue0" value="0.05553709718858124"/>
    <att type="string" name="canonicalName" value="GO:00712810"/>
    <graphics type="ELLIPSE" h="30.0" w="30.0" x="1691.0" y="1361.0" fill="#8bac27" width="1" outline="#000000"/>
  </node>
  <node label="GO:00712480" id="-215">
    <att type="real" name="% Associated Genes0" value="6.25"/>
    <att type="string" name="All Associated Genes0" value="[AT1G62380, AT1G66340, AT2G19590, AT2G22810, AT3G20770, AT3G49700, AT3G53280, AT4G11280, AT5G03730, At1g21140, At1g76800, At2g05830, At3g25190, At4g35040, At5g38820, At5g55620, BGLU42, CAS, EIL1, EIL3, EIN2, F14G92, FIT, FRD3, HSP90-3, IRT1, MTK, NAS1, NAS2, SAM1, SAM2, SBP1]"/>
    <att type="string" name="Associated Genes Found0" value="[AT1G62380, AT4G11280]"/>
    <att type="string" name="GOGroups0" value="[Group8]"/>
    <att type="string" name="GOID0" value="GO:0071248"/>
    <att type="string" name="GOLevels0" value="[5]"/>
    <att type="string" name="GOTerm0" value="cellular response to metal ion"/>
    <att type="string" name="Group PValue Corrected with Bonferroni0" value="{Group8=1.9149650656212817E-4}"/>
    <att type="string" name="Group PValue0" value="{Group8=1.126450038600754E-5}"/>
    <att type="integer" name="Nr. Genes0" value="2"/>
    <att type="string" name="Ontology Source0" value="GO_BiologicalProcess_05.05.2011_16h22"/>
    <att type="string" name="OverViewTerm0" value="FALSE"/>
    <att type="real" name="Term PValue Corrected with Bonferroni0" value="1.0"/>
    <att type="real" name="Term PValue0" value="0.07035955889051548"/>
    <att type="string" name="canonicalName" value="GO:00712480"/>
    <graphics type="ELLIPSE" h="30.0" w="30.0" x="1828.0" y="1242.0" fill="#8bac27" width="1" outline="#000000"/>
  </node>
  <node label="GO:00712410" id="-214">
    <att type="real" name="% Associated Genes0" value="5.714285850524902"/>
    <att type="string" name="All Associated Genes0" value="[AT1G12820, AT1G62380, AT1G66340, AT2G14210, AT2G19590, AT2G22810, AT3G20770, AT3G49700, AT3G53280, AT4G11280, AT5G03730, AT5G10720, At1g21140, At1g76800, At2g05830, At3g25190, At4g35040, At5g38820, At5g55620, BGLU42, CAS, EIL1, EIL3, EIN2, F14G92, FIT, FRD3, HSP90-3, IRT1, MTK, NAS1, NAS2, SAM1, SAM2, SBP1]"/>
    <att type="string" name="Associated Genes Found0" value="[AT1G62380, AT4G11280]"/>
    <att type="string" name="GOGroups0" value="[Group8]"/>
    <att type="string" name="GOID0" value="GO:0071241"/>
    <att type="string" name="GOLevels0" value="[4]"/>
    <att type="string" name="GOTerm0" value="cellular response to inorganic substance"/>
    <att type="string" name="Group PValue Corrected with Bonferroni0" value="{Group8=1.9149650656212817E-4}"/>
    <att type="string" name="Group PValue0" value="{Group8=1.126450038600754E-5}"/>
    <att type="integer" name="Nr. Genes0" value="2"/>
    <att type="string" name="Ontology Source0" value="GO_BiologicalProcess_05.05.2011_16h22"/>
    <att type="string" name="OverViewTerm0" value="FALSE"/>
    <att type="real" name="Term PValue Corrected with Bonferroni0" value="1.0"/>
    <att type="real" name="Term PValue0" value="0.08221838357765038"/>
    <att type="string" name="canonicalName" value="GO:00712410"/>
    <graphics type="ELLIPSE" h="30.0" w="30.0" x="1693.0" y="1277.0" fill="#8bac27" width="1" outline="#000000"/>
  </node>
  <node label="GO:00705420" id="-213">
    <att type="real" name="% Associated Genes0" value="50.0"/>
    <att type="string" name="All Associated Genes0" value="[AT1G05010, AT1G62380, AT2G19590, At1g12010]"/>
    <att type="string" name="Associated Genes Found0" value="[AT1G05010, AT1G62380]"/>
    <att type="string" name="GOGroups0" value="[Group8]"/>
    <att type="string" name="GOID0" value="GO:0070542"/>
    <att type="string" name="GOLevels0" value="[5]"/>
    <att type="string" name="GOTerm0" value="response to fatty acid"/>
    <att type="string" name="Group PValue Corrected with Bonferroni0" value="{Group8=1.9149650656212817E-4}"/>
    <att type="string" name="Group PValue0" value="{Group8=1.126450038600754E-5}"/>
    <att type="integer" name="Nr. Genes0" value="2"/>
    <att type="string" name="Ontology Source0" value="GO_BiologicalProcess_05.05.2011_16h22"/>
    <att type="string" name="OverViewTerm0" value="FALSE"/>
    <att type="real" name="Term PValue Corrected with Bonferroni0" value="0.16271798494051143"/>
    <att type="real" name="Term PValue0" value="0.0010920670130235666"/>
    <att type="string" name="canonicalName" value="GO:00705420"/>
    <graphics type="ELLIPSE" h="30.0" w="30.0" x="1729.0" y="1377.0" fill="#8bac27" width="1" outline="#000000"/>
  </node>
  <node label="GO:00525450" id="-212">
    <att type="real" name="% Associated Genes0" value="16.0"/>
    <att type="string" name="All Associated Genes0" value="[ABCG36, AT1G18570, AT1G24100, AT1G66340, AT2G22330, AT4G26850, AT4G39950, AT5G44070, ATRBOH F, At1g28380, At1g73370, At3g03250, At5g17310, At5g37180, At5g61130, BGLU26, CALS12, CALS7, CALS9, CYP83B1, EIN2, FLS2, RML1, TSA1, cyp81F2]"/>
    <att type="string" name="Associated Genes Found0" value="[AT1G18570, AT2G22330, AT4G39950, AT5G44070]"/>
    <att type="string" name="GOGroups0" value="[Group11]"/>
    <att type="string" name="GOID0" value="GO:0052545"/>
    <att type="string" name="GOLevels0" value="[4]"/>
    <att type="string" name="GOTerm0" value="callose localization"/>
    <att type="string" name="Group PValue Corrected with Bonferroni0" value="{Group11=1.5686285002411636E-22}"/>
    <att type="string" name="Group PValue0" value="{Group11=9.227226472006844E-24}"/>
    <att type="integer" name="Nr. Genes0" value="4"/>
    <att type="string" name="Ontology Source0" value="GO_BiologicalProcess_05.05.2011_16h22"/>
    <att type="string" name="OverViewTerm0" value="FALSE"/>
    <att type="real" name="Term PValue Corrected with Bonferroni0" value="0.05080430006963836"/>
    <att type="real" name="Term PValue0" value="3.409684568432105E-4"/>
    <att type="string" name="canonicalName" value="GO:00525450"/>
    <graphics type="ELLIPSE" h="50.0" w="50.0" x="685.74169921875" y="1226.1285400390625" fill="#02068d" width="1" outline="#000000"/>
  </node>
  <node label="GO:00525440" id="-211">
    <att type="real" name="% Associated Genes0" value="25.0"/>
    <att type="string" name="All Associated Genes0" value="[ABCG36, AT1G18570, AT1G24100, AT1G66340, AT2G22330, AT4G26850, AT4G39950, AT5G44070, BGLU26, CALS12, CYP83B1, EIN2, FLS2, RML1, TSA1, cyp81F2]"/>
    <att type="string" name="Associated Genes Found0" value="[AT1G18570, AT2G22330, AT4G39950, AT5G44070]"/>
    <att type="string" name="GOGroups0" value="[Group11]"/>
    <att type="string" name="GOID0" value="GO:0052544"/>
    <att type="string" name="GOLevels0" value="[5, 6, 7]"/>
    <att type="string" name="GOTerm0" value="defense response by callose deposition in cell wall"/>
    <att type="string" name="Group PValue Corrected with Bonferroni0" value="{Group11=1.5686285002411636E-22}"/>
    <att type="string" name="Group PValue0" value="{Group11=9.227226472006844E-24}"/>
    <att type="integer" name="Nr. Genes0" value="4"/>
    <att type="string" name="Ontology Source0" value="GO_BiologicalProcess_05.05.2011_16h22"/>
    <att type="string" name="OverViewTerm0" value="FALSE"/>
    <att type="real" name="Term PValue Corrected with Bonferroni0" value="0.008049581561925884"/>
    <att type="real" name="Term PValue0" value="5.4024037328361644E-5"/>
    <att type="string" name="canonicalName" value="GO:00525440"/>
    <graphics type="ELLIPSE" h="50.0" w="50.0" x="779.7548828125" y="1131.0166015625" fill="#02068d" width="1" outline="#000000"/>
  </node>
  <node label="GO:00525430" id="-210">
    <att type="real" name="% Associated Genes0" value="20.0"/>
    <att type="string" name="All Associated Genes0" value="[ABCG36, AT1G18570, AT1G24100, AT1G66340, AT2G22330, AT4G26850, AT4G39950, AT5G44070, At3g03250, At5g17310, At5g61130, BGLU26, CALS12, CALS9, CYP83B1, EIN2, FLS2, RML1, TSA1, cyp81F2]"/>
    <att type="string" name="Associated Genes Found0" value="[AT1G18570, AT2G22330, AT4G39950, AT5G44070]"/>
    <att type="string" name="GOGroups0" value="[Group11]"/>
    <att type="string" name="GOID0" value="GO:0052543"/>
    <att type="string" name="GOLevels0" value="[4, 5, 6]"/>
    <att type="string" name="GOTerm0" value="callose deposition in cell wall"/>
    <att type="string" name="Group PValue Corrected with Bonferroni0" value="{Group11=1.5686285002411636E-22}"/>
    <att type="string" name="Group PValue0" value="{Group11=9.227226472006844E-24}"/>
    <att type="integer" name="Nr. Genes0" value="4"/>
    <att type="string" name="Ontology Source0" value="GO_BiologicalProcess_05.05.2011_16h22"/>
    <att type="string" name="OverViewTerm0" value="FALSE"/>
    <att type="real" name="Term PValue Corrected with Bonferroni0" value="0.020528497903079434"/>
    <att type="real" name="Term PValue0" value="1.377751537119425E-4"/>
    <att type="string" name="canonicalName" value="GO:00525430"/>
    <graphics type="ELLIPSE" h="50.0" w="50.0" x="825.9228515625" y="1262.1513671875" fill="#02068d" width="1" outline="#000000"/>
  </node>
  <node label="GO:00525420" id="-209">
    <att type="real" name="% Associated Genes0" value="22.22222137451172"/>
    <att type="string" name="All Associated Genes0" value="[ABCG36, AT1G18570, AT1G24100, AT1G66340, AT2G22330, AT4G26850, AT4G39950, AT5G44070, ATRBOH F, At1g28380, BGLU26, CALS12, CYP83B1, EIN2, FLS2, RML1, TSA1, cyp81F2]"/>
    <att type="string" name="Associated Genes Found0" value="[AT1G18570, AT2G22330, AT4G39950, AT5G44070]"/>
    <att type="string" name="GOGroups0" value="[Group11]"/>
    <att type="string" name="GOID0" value="GO:0052542"/>
    <att type="string" name="GOLevels0" value="[4, 5]"/>
    <att type="string" name="GOTerm0" value="defense response by callose deposition"/>
    <att type="string" name="Group PValue Corrected with Bonferroni0" value="{Group11=1.5686285002411636E-22}"/>
    <att type="string" name="Group PValue0" value="{Group11=9.227226472006844E-24}"/>
    <att type="integer" name="Nr. Genes0" value="4"/>
    <att type="string" name="Ontology Source0" value="GO_BiologicalProcess_05.05.2011_16h22"/>
    <att type="string" name="OverViewTerm0" value="FALSE"/>
    <att type="real" name="Term PValue Corrected with Bonferroni0" value="0.013246469142589418"/>
    <att type="real" name="Term PValue0" value="8.890247746704307E-5"/>
    <att type="string" name="canonicalName" value="GO:00525420"/>
    <graphics type="ELLIPSE" h="50.0" w="50.0" x="718.6475219726562" y="1158.9927978515625" fill="#02068d" width="1" outline="#000000"/>
  </node>
  <node label="GO:00524820" id="-208">
    <att type="real" name="% Associated Genes0" value="25.0"/>
    <att type="string" name="All Associated Genes0" value="[ABCG36, AT1G18570, AT1G24100, AT1G66340, AT2G22330, AT4G26850, AT4G39950, AT5G44070, BGLU26, CALS12, CYP83B1, EIN2, FLS2, RML1, TSA1, cyp81F2]"/>
    <att type="string" name="Associated Genes Found0" value="[AT1G18570, AT2G22330, AT4G39950, AT5G44070]"/>
    <att type="string" name="GOGroups0" value="[Group11]"/>
    <att type="string" name="GOID0" value="GO:0052482"/>
    <att type="string" name="GOLevels0" value="[4, 6]"/>
    <att type="string" name="GOTerm0" value="defense response by cell wall thickening"/>
    <att type="string" name="Group PValue Corrected with Bonferroni0" value="{Group11=1.5686285002411636E-22}"/>
    <att type="string" name="Group PValue0" value="{Group11=9.227226472006844E-24}"/>
    <att type="integer" name="Nr. Genes0" value="4"/>
    <att type="string" name="Ontology Source0" value="GO_BiologicalProcess_05.05.2011_16h22"/>
    <att type="string" name="OverViewTerm0" value="FALSE"/>
    <att type="real" name="Term PValue Corrected with Bonferroni0" value="0.008049581561925884"/>
    <att type="real" name="Term PValue0" value="5.4024037328361644E-5"/>
    <att type="string" name="canonicalName" value="GO:00524820"/>
    <graphics type="ELLIPSE" h="50.0" w="50.0" x="817.939453125" y="1175.0" fill="#02068d" width="1" outline="#000000"/>
  </node>
  <node label="GO:00523860" id="-207">
    <att type="real" name="% Associated Genes0" value="20.83333396911621"/>
    <att type="string" name="All Associated Genes0" value="[ABCG36, AT1G18570, AT1G19300, AT1G24100, AT1G66340, AT2G22330, AT4G26850, AT4G39950, AT5G44070, At3g03250, At5g17310, At5g61130, BGLU26, CALS12, CALS9, CESA4, CYP83B1, EIN2, FLS2, IRX1, IRX3, RML1, TSA1, cyp81F2]"/>
    <att type="string" name="Associated Genes Found0" value="[AT1G18570, AT1G19300, AT2G22330, AT4G39950, AT5G44070]"/>
    <att type="string" name="GOGroups0" value="[Group11]"/>
    <att type="string" name="GOID0" value="GO:0052386"/>
    <att type="string" name="GOLevels0" value="[5]"/>
    <att type="string" name="GOTerm0" value="cell wall thickening"/>
    <att type="string" name="Group PValue Corrected with Bonferroni0" value="{Group11=1.5686285002411636E-22}"/>
    <att type="string" name="Group PValue0" value="{Group11=9.227226472006844E-24}"/>
    <att type="integer" name="Nr. Genes0" value="5"/>
    <att type="string" name="Ontology Source0" value="GO_BiologicalProcess_05.05.2011_16h22"/>
    <att type="string" name="OverViewTerm0" value="FALSE"/>
    <att type="real" name="Term PValue Corrected with Bonferroni0" value="0.002320969107626881"/>
    <att type="real" name="Term PValue0" value="1.5576973876690477E-5"/>
    <att type="string" name="canonicalName" value="GO:00523860"/>
    <graphics type="ELLIPSE" h="50.0" w="50.0" x="731.3489379882812" y="1213.217529296875" fill="#02068d" width="1" outline="#000000"/>
  </node>
  <node label="GO:00523170" id="-206">
    <att type="real" name="% Associated Genes0" value="62.5"/>
    <att type="string" name="All Associated Genes0" value="[AT2G22330, AT2G30770, AT2G38470, AT2G43790, AT3G26830, AT3G45640, AT4G39950, At1g73500/T9L24_8]"/>
    <att type="string" name="Associated Genes Found0" value="[AT2G22330, AT2G30770, AT3G26830, AT3G45640, AT4G39950]"/>
    <att type="string" name="GOGroups0" value="[Group11]"/>
    <att type="string" name="GOID0" value="GO:0052317"/>
    <att type="string" name="GOLevels0" value="[4, 5, 6]"/>
    <att type="string" name="GOTerm0" value="camalexin metabolic process"/>
    <att type="string" name="Group PValue Corrected with Bonferroni0" value="{Group11=1.5686285002411636E-22}"/>
    <att type="string" name="Group PValue0" value="{Group11=9.227226472006844E-24}"/>
    <att type="integer" name="Nr. Genes0" value="5"/>
    <att type="string" name="Ontology Source0" value="GO_BiologicalProcess_05.05.2011_16h22"/>
    <att type="string" name="OverViewTerm0" value="FALSE"/>
    <att type="real" name="Term PValue Corrected with Bonferroni0" value="3.6557816590166254E-6"/>
    <att type="real" name="Term PValue0" value="2.4535447375950506E-8"/>
    <att type="string" name="canonicalName" value="GO:00523170"/>
    <graphics type="ELLIPSE" h="50.000244140625" w="50.0" x="928.6142578125" y="971.7548828125" fill="#02068d" width="1" outline="#000000"/>
  </node>
  <node label="GO:00523150" id="-205">
    <att type="real" name="% Associated Genes0" value="55.55555725097656"/>
    <att type="string" name="All Associated Genes0" value="[AT2G22330, AT2G30770, AT2G38470, AT2G43790, AT3G26830, AT3G45640, AT4G39950, At1g73500/T9L24_8, RML1]"/>
    <att type="string" name="Associated Genes Found0" value="[AT2G22330, AT2G30770, AT3G26830, AT3G45640, AT4G39950]"/>
    <att type="string" name="GOGroups0" value="[Group11]"/>
    <att type="string" name="GOID0" value="GO:0052315"/>
    <att type="string" name="GOLevels0" value="[4]"/>
    <att type="string" name="GOTerm0" value="phytoalexin biosynthetic process"/>
    <att type="string" name="Group PValue Corrected with Bonferroni0" value="{Group11=1.5686285002411636E-22}"/>
    <att type="string" name="Group PValue0" value="{Group11=9.227226472006844E-24}"/>
    <att type="integer" name="Nr. Genes0" value="5"/>
    <att type="string" name="Ontology Source0" value="GO_BiologicalProcess_05.05.2011_16h22"/>
    <att type="string" name="OverViewTerm0" value="FALSE"/>
    <att type="real" name="Term PValue Corrected with Bonferroni0" value="8.134025338267946E-6"/>
    <att type="real" name="Term PValue0" value="5.459077408233521E-8"/>
    <att type="string" name="canonicalName" value="GO:00523150"/>
    <graphics type="ELLIPSE" h="50.0" w="50.0" x="871.0" y="1006.0" fill="#02068d" width="1" outline="#000000"/>
  </node>
  <node label="GO:00523140" id="-204">
    <att type="real" name="% Associated Genes0" value="55.55555725097656"/>
    <att type="string" name="All Associated Genes0" value="[AT2G22330, AT2G30770, AT2G38470, AT2G43790, AT3G26830, AT3G45640, AT4G39950, At1g73500/T9L24_8, RML1]"/>
    <att type="string" name="Associated Genes Found0" value="[AT2G22330, AT2G30770, AT3G26830, AT3G45640, AT4G39950]"/>
    <att type="string" name="GOGroups0" value="[Group11]"/>
    <att type="string" name="GOID0" value="GO:0052314"/>
    <att type="string" name="GOLevels0" value="[3]"/>
    <att type="string" name="GOTerm0" value="phytoalexin metabolic process"/>
    <att type="string" name="Group PValue Corrected with Bonferroni0" value="{Group11=1.5686285002411636E-22}"/>
    <att type="string" name="Group PValue0" value="{Group11=9.227226472006844E-24}"/>
    <att type="integer" name="Nr. Genes0" value="5"/>
    <att type="string" name="Ontology Source0" value="GO_BiologicalProcess_05.05.2011_16h22"/>
    <att type="string" name="OverViewTerm0" value="FALSE"/>
    <att type="real" name="Term PValue Corrected with Bonferroni0" value="8.134025338267946E-6"/>
    <att type="real" name="Term PValue0" value="5.459077408233521E-8"/>
    <att type="string" name="canonicalName" value="GO:00523140"/>
    <graphics type="ELLIPSE" h="50.0" w="50.0" x="759.7412109375" y="1044.8720703125" fill="#02068d" width="1" outline="#000000"/>
  </node>
  <node label="GO:00512540" id="-203">
    <att type="real" name="% Associated Genes0" value="4.938271522521973"/>
    <att type="string" name="All Associated Genes0" value="[AT1G21600, AT1G28300, AT1G45249, AT1G62180, AT1G69120, AT2G20570, AT2G36270, AT2G36490, AT2G42680, AT3G01470, AT3G11440, AT3G24140, AT3G24500, AT3G26744, AT3G58680, AT3G60390, AT3G61890, AT4G40060, AT5G06100, AT5G08565, AT5G22220, AT5G22260, AT5G44190, AT5G47220, AT5G65310, ATHB-51, ATHB-6, ATHSFA2, At1g25540, At1g61040, At1g71930, At1g73500/T9L24_8, At2g02540, At2g32460, At2g34210, At2g34640, At2g35530, At3g09210, At3g10800, At4g08350, At5g08565, At5g62380, At5g63670, BHLH54, BRN1, BRN2, CPL2, DOF3, DOF5, DPBF2, E2FA, ELF8, F24M1200, F27K19_170, GATA12, GATA2, GATA3, GATA4, GATA5, GATA6, GATA7, GATA8, GATA9, GCN5, NAC012, NAC043, NAC066, NAC078, NAC69, NFYB6, NFYB9, NFYC1, NFYC2, NPR6, NP_182035, PTAC2, RAP1, SCL14, WRKY53, ZAP1, sig]"/>
    <att type="string" name="Associated Genes Found0" value="[AT2G42680, AT3G60390, AT3G61890, AT5G44190]"/>
    <att type="string" name="GOGroups0" value="[Group6]"/>
    <att type="string" name="GOID0" value="GO:0051254"/>
    <att type="string" name="GOLevels0" value="[6, 7]"/>
    <att type="string" name="GOTerm0" value="positive regulation of RNA metabolic process"/>
    <att type="string" name="Group PValue Corrected with Bonferroni0" value="{Group6=0.005947125430452599}"/>
    <att type="string" name="Group PValue0" value="{Group6=3.498309076736823E-4}"/>
    <att type="integer" name="Nr. Genes0" value="4"/>
    <att type="string" name="Ontology Source0" value="GO_BiologicalProcess_05.05.2011_16h22"/>
    <att type="string" name="OverViewTerm0" value="FALSE"/>
    <att type="real" name="Term PValue Corrected with Bonferroni0" value="1.0"/>
    <att type="real" name="Term PValue0" value="0.02482418578669655"/>
    <att type="string" name="canonicalName" value="GO:00512540"/>
    <graphics type="ELLIPSE" h="30.0" w="30.0" x="1724.7197265625" y="828.663330078125" fill="#6eee80" width="1" outline="#000000"/>
  </node>
  <node label="GO:00512530" id="-202">
    <att type="real" name="% Associated Genes0" value="4.6875"/>
    <att type="string" name="All Associated Genes0" value="[AHL21, AT1G02450, AT1G02580, AT1G24190, AT1G54160, AT1G59750, AT1G63020, AT2G22540, AT2G27040, AT2G32940, AT2G36490, AT2G39810, AT2G43410, AT3G01320, AT4G03190, AT4G05420, AT4G15900, AT4G16280, AT4G16780, AT4G32551, AT4G38130, AT4G38620, AT5G02030, AT5G08550, AT5G13240, AT5G15380, AT5G17690, AT5G54500, AT5G62000, At1g74660, At2g30280, At2g32700, At2g47210, At4g28110, At4g37460/F6G17_110, At5g09230, At5g40530, At5g55760, CHR1, CMT3, CPL1, DOF5, GRXC7, GRXC8, GTL1, HAG2, HD2B, MEE58, MOM1, NFYA4, NFYA7, NFYA9, PKL, RING1A, RING1B, SAL1, SAS1, SUVH5, T27I15_140, T5E8_30, T8P1980, WRKY27, WRKY42, WRKY6]"/>
    <att type="string" name="Associated Genes Found0" value="[AT1G02450, AT2G27040, AT5G54500]"/>
    <att type="string" name="GOGroups0" value="[Group10, Group17, Group5]"/>
    <att type="string" name="GOID0" value="GO:0051253"/>
    <att type="string" name="GOLevels0" value="[6, 7]"/>
    <att type="string" name="GOTerm0" value="negative regulation of RNA metabolic process"/>
    <att type="string" name="Group PValue Corrected with Bonferroni0" value="{Group10=0.006736712397954536, Group17=0.0032000058459379366, Group5=2.6136523534972203E-9}"/>
    <att type="string" name="Group PValue0" value="{Group10=3.962771998796786E-4, Group17=1.8823563799634922E-4, Group5=1.5374425608807179E-10}"/>
    <att type="integer" name="Nr. Genes0" value="3"/>
    <att type="string" name="Ontology Source0" value="GO_BiologicalProcess_05.05.2011_16h22"/>
    <att type="string" name="OverViewTerm0" value="FALSE"/>
    <att type="real" name="Term PValue Corrected with Bonferroni0" value="1.0"/>
    <att type="real" name="Term PValue0" value="0.05693269228795988"/>
    <att type="string" name="canonicalName" value="GO:00512530"/>
    <graphics type="ELLIPSE" h="30.0" w="30.0" x="1131.0" y="515.0" fill="#8be2c9" width="1" outline="#000000"/>
  </node>
  <node label="GO:00511870" id="-201">
    <att type="real" name="% Associated Genes0" value="4.6875"/>
    <att type="string" name="All Associated Genes0" value="[ACO3, AT1G62380, AT2G17130, AT2G18450, AT2G19590, AT2G26550, AT3G27380, AT3G44880, AT3G58740, AT3G58750, AT3G60100, AT4G35260, AT4G37000, AT5G13800, AT5G40650, AT5G65165, ATCS, At1g04410, At1g53240, At1g58300, At1g65930, At1g69720, At2g20420, At2g22780, At2g26670, At3g15020, At3g47520, At4g26910, At5g08300, At5g09660, At5g14590, At5g23250, At5g43330, At5g50950, At5g55070, At5g56720, At5g58330, CLH1, CLH2, CSY3, ETFB, F7H1900, F8F6_70, FUM1, FUM2, HO3, ICDH, ICL, IDH3, IDH5, IDH6, NOL, NP_180223, NYC1, PHO2, PPC1, PPC2, PPC3, PPC4, PPD, SDH1-1, SDH2-1, TED4, sdh4]"/>
    <att type="string" name="Associated Genes Found0" value="[AT1G62380, AT3G44880, AT5G13800]"/>
    <att type="string" name="GOGroups0" value="[Group11, Group17, Group8]"/>
    <att type="string" name="GOID0" value="GO:0051187"/>
    <att type="string" name="GOLevels0" value="[4]"/>
    <att type="string" name="GOTerm0" value="cofactor catabolic process"/>
    <att type="string" name="Group PValue Corrected with Bonferroni0" value="{Group11=1.5686285002411636E-22, Group17=0.0032000058459379366, Group8=1.9149650656212817E-4}"/>
    <att type="string" name="Group PValue0" value="{Group11=9.227226472006844E-24, Group17=1.8823563799634922E-4, Group8=1.126450038600754E-5}"/>
    <att type="integer" name="Nr. Genes0" value="3"/>
    <att type="string" name="Ontology Source0" value="GO_BiologicalProcess_05.05.2011_16h22"/>
    <att type="string" name="OverViewTerm0" value="FALSE"/>
    <att type="real" name="Term PValue Corrected with Bonferroni0" value="1.0"/>
    <att type="real" name="Term PValue0" value="0.05693269228795988"/>
    <att type="string" name="canonicalName" value="GO:00511870"/>
    <graphics type="ELLIPSE" h="30.0" w="30.0" x="1485.0" y="1192.0" fill="#02068d" width="1" outline="#000000"/>
  </node>
  <node label="GO:00511730" id="-200">
    <att type="real" name="% Associated Genes0" value="4.597701072692871"/>
    <att type="string" name="All Associated Genes0" value="[AT1G21600, AT1G28300, AT1G45249, AT1G62180, AT1G69120, AT2G20570, AT2G23430, AT2G36270, AT2G36490, AT2G42680, AT3G01470, AT3G11440, AT3G24140, AT3G24500, AT3G26744, AT3G58680, AT3G60390, AT3G61890, AT4G40060, AT5G06100, AT5G08565, AT5G22220, AT5G22260, AT5G44190, AT5G47220, AT5G65310, ATHB-51, ATHB-6, ATHSFA2, At1g25540, At1g61040, At1g71930, At1g73500/T9L24_8, At1g75500, At2g02540, At2g32460, At2g34210, At2g34640, At2g35530, At3g09210, At3g10800, At4g08350, At5g08565, At5g62380, At5g63670, BHLH54, BRN1, BRN2, CPL2, DOF3, DOF5, DPBF2, E2FA, ELF8, ERABP1, F18K100, F24M1200, F27K19_170, FZR1, GATA12, GATA2, GATA3, GATA4, GATA5, GATA6, GATA7, GATA8, GATA9, GCN5, INO80, NAC012, NAC043, NAC066, NAC078, NAC69, NFYB6, NFYB9, NFYC1, NFYC2, NPR6, NP_182035, PTAC2, RAP1, SCL14, WRKY53, ZAP1, sig]"/>
    <att type="string" name="Associated Genes Found0" value="[AT2G42680, AT3G60390, AT3G61890, AT5G44190]"/>
    <att type="string" name="GOGroups0" value="[Group6]"/>
    <att type="string" name="GOID0" value="GO:0051173"/>
    <att type="string" name="GOLevels0" value="[5]"/>
    <att type="string" name="GOTerm0" value="positive regulation of nitrogen compound metabolic process"/>
    <att type="string" name="Group PValue Corrected with Bonferroni0" value="{Group6=0.005947125430452599}"/>
    <att type="string" name="Group PValue0" value="{Group6=3.498309076736823E-4}"/>
    <att type="integer" name="Nr. Genes0" value="4"/>
    <att type="string" name="Ontology Source0" value="GO_BiologicalProcess_05.05.2011_16h22"/>
    <att type="string" name="OverViewTerm0" value="FALSE"/>
    <att type="real" name="Term PValue Corrected with Bonferroni0" value="1.0"/>
    <att type="real" name="Term PValue0" value="0.031202754560124075"/>
    <att type="string" name="canonicalName" value="GO:00511730"/>
    <graphics type="ELLIPSE" h="30.00006103515625" w="30.0001220703125" x="1768.6318969726562" y="881.0901184082031" fill="#6eee80" width="1" outline="#000000"/>
  </node>
  <node label="GO:00511720" id="-199">
    <att type="real" name="% Associated Genes0" value="4.0"/>
    <att type="string" name="All Associated Genes0" value="[AHL21, AT1G02450, AT1G02580, AT1G02970, AT1G20330, AT1G24190, AT1G54160, AT1G59750, AT1G63020, AT2G22540, AT2G27040, AT2G32940, AT2G36490, AT2G39810, AT2G43410, AT3G01320, AT3G48160, AT4G03190, AT4G05420, AT4G15900, AT4G16280, AT4G16780, AT4G32551, AT4G38130, AT4G38620, AT5G02030, AT5G08550, AT5G13060, AT5G13240, AT5G15380, AT5G17690, AT5G54500, AT5G57740, AT5G62000, At1g14410, At1g74660, At2g30280, At2g32700, At2g47210, At3g02820/F13E7_24, At4g28110, At4g37460/F6G17_110, At5g09230, At5g40530, At5g55760, CHR1, CMT3, CPL1, DOF5, F13E74, GRXC7, GRXC8, GTL1, HAG2, HD2B, MEE58, MOM1, MSH2, NFYA4, NFYA7, NFYA9, OSB1, PKL, RING1A, RING1B, SAL1, SAS1, SKP1, SUVH5, T27I15_140, T5E8_30, T8P1980, WRKY27, WRKY42, WRKY6]"/>
    <att type="string" name="Associated Genes Found0" value="[AT1G02450, AT2G27040, AT5G54500]"/>
    <att type="string" name="GOGroups0" value="[Group10, Group17, Group5]"/>
    <att type="string" name="GOID0" value="GO:0051172"/>
    <att type="string" name="GOLevels0" value="[5]"/>
    <att type="string" name="GOTerm0" value="negative regulation of nitrogen compound metabolic process"/>
    <att type="string" name="Group PValue Corrected with Bonferroni0" value="{Group10=0.006736712397954536, Group17=0.0032000058459379366, Group5=2.6136523534972203E-9}"/>
    <att type="string" name="Group PValue0" value="{Group10=3.962771998796786E-4, Group17=1.8823563799634922E-4, Group5=1.5374425608807179E-10}"/>
    <att type="integer" name="Nr. Genes0" value="3"/>
    <att type="string" name="Ontology Source0" value="GO_BiologicalProcess_05.05.2011_16h22"/>
    <att type="string" name="OverViewTerm0" value="FALSE"/>
    <att type="real" name="Term PValue Corrected with Bonferroni0" value="1.0"/>
    <att type="real" name="Term PValue0" value="0.08294146741444733"/>
    <att type="string" name="canonicalName" value="GO:00511720"/>
    <graphics type="ELLIPSE" h="30.0" w="30.0" x="1164.0" y="514.0" fill="#8be2c9" width="1" outline="#000000"/>
  </node>
  <node label="GO:00511300" id="-198">
    <att type="real" name="% Associated Genes0" value="7.692307472229004"/>
    <att type="string" name="All Associated Genes0" value="[AMSH3, ASHH2, AT1G29170, AT1G57820, AT1G66050, AT1G73840, AT2G22640, AT2G29890, AT2G34150, AT5G18410, AT5G39550, At1g13950, At1g26630, At1g69410, At2g46225, CHR1, FH3, FH5, FH8, MAP65-1, MAP65-6, NAP1, Q42021, SAL1, SCAR2, SCAR4]"/>
    <att type="string" name="Associated Genes Found0" value="[AT1G73840, AT5G18410]"/>
    <att type="string" name="GOGroups0" value="[Group6, Group9]"/>
    <att type="string" name="GOID0" value="GO:0051130"/>
    <att type="string" name="GOLevels0" value="[4]"/>
    <att type="string" name="GOTerm0" value="positive regulation of cellular component organization"/>
    <att type="string" name="Group PValue Corrected with Bonferroni0" value="{Group6=0.005947125430452599, Group9=0.011180158214547965}"/>
    <att type="string" name="Group PValue0" value="{Group6=3.498309076736823E-4, Group9=6.57656365561645E-4}"/>
    <att type="integer" name="Nr. Genes0" value="2"/>
    <att type="string" name="Ontology Source0" value="GO_BiologicalProcess_05.05.2011_16h22"/>
    <att type="string" name="OverViewTerm0" value="FALSE"/>
    <att type="real" name="Term PValue Corrected with Bonferroni0" value="1.0"/>
    <att type="real" name="Term PValue0" value="0.04859896158340759"/>
    <att type="string" name="canonicalName" value="GO:00511300"/>
    <graphics type="ELLIPSE" h="30.00006103515625" w="30.0" x="1822.978271484375" y="700.4362487792969" fill="#6eee80" width="1" outline="#000000"/>
  </node>
  <node label="GO:00510940" id="-197">
    <att type="real" name="% Associated Genes0" value="4.081632614135742"/>
    <att type="string" name="All Associated Genes0" value="[ABCC1, AT1G26830, AT1G62380, AT1G65480, AT1G68050, AT2G19450, AT2G22630, AT2G33810, AT2G34900, AT2G43410, AT2G45650, AT2G45660, AT2G46410, AT3G24140, AT4G15880, AT4G20370, AT4G25530, AT4G32880, AT4G35900, AT4G39400, AT5G05690, AT5G13910, AT5G24860, AT5G41990, AT5G57390, AT5G60910, AT5G62000, ATJ3, At1g10670, At3g03090, At3g04610, At3g22590, At4g04885, At4g22140, At4g24620, At5g08370, At5g55390, BHLH63, BHLH76, CAL, CRY2, EPFL9, GI, MFT, SAL1, SMB, SUB, VAL1, VAL2]"/>
    <att type="string" name="Associated Genes Found0" value="[AT1G62380, AT5G41990]"/>
    <att type="string" name="GOGroups0" value="[Group7, Group8]"/>
    <att type="string" name="GOID0" value="GO:0051094"/>
    <att type="string" name="GOLevels0" value="[4]"/>
    <att type="string" name="GOTerm0" value="positive regulation of developmental process"/>
    <att type="string" name="Group PValue Corrected with Bonferroni0" value="{Group7=0.005947125430452599, Group8=1.9149650656212817E-4}"/>
    <att type="string" name="Group PValue0" value="{Group7=3.498309076736823E-4, Group8=1.126450038600754E-5}"/>
    <att type="integer" name="Nr. Genes0" value="2"/>
    <att type="string" name="Ontology Source0" value="GO_BiologicalProcess_05.05.2011_16h22"/>
    <att type="string" name="OverViewTerm0" value="FALSE"/>
    <att type="real" name="Term PValue Corrected with Bonferroni0" value="1.0"/>
    <att type="real" name="Term PValue0" value="0.14396568768788084"/>
    <att type="string" name="canonicalName" value="GO:00510940"/>
    <graphics type="ELLIPSE" h="30.0" w="30.0" x="1683.9833984375" y="1079.46875" fill="#fed31a" width="1" outline="#000000"/>
  </node>
  <node label="GO:00507760" id="-196">
    <att type="real" name="% Associated Genes0" value="8.69565200805664"/>
    <att type="string" name="All Associated Genes0" value="[ASHH2, AT1G02450, AT1G33520, AT1G80680, AT2G22330, AT2G43790, AT3G15210, AT3G18690, AT3G26830, AT4G11260, AT4G12720, AT4G15900, AT4G18470, AT4G25230, AT4G37000, AT4g22300, AT5G13220, AT5G40990, AT5G47220, AT5G51450, AT5G59890, AT5G60410, ATMKK3, At1g71220, At3g05360, At5g22330, CALS12, CRT3, EFR, F14G92, F24J70, FMO1, GH32, ILL5, ILL6, JAR1, MOS4, PBA1, RIN4, RPS4, SAS1, SGT1A, SYP121, SYP122, WRKY70, erd2]"/>
    <att type="string" name="Associated Genes Found0" value="[AT1G02450, AT2G22330, AT3G26830, AT5G13220]"/>
    <att type="string" name="GOGroups0" value="[Group11]"/>
    <att type="string" name="GOID0" value="GO:0050776"/>
    <att type="string" name="GOLevels0" value="[4]"/>
    <att type="string" name="GOTerm0" value="regulation of immune response"/>
    <att type="string" name="Group PValue Corrected with Bonferroni0" value="{Group11=1.5686285002411636E-22}"/>
    <att type="string" name="Group PValue0" value="{Group11=9.227226472006844E-24}"/>
    <att type="integer" name="Nr. Genes0" value="4"/>
    <att type="string" name="Ontology Source0" value="GO_BiologicalProcess_05.05.2011_16h22"/>
    <att type="string" name="OverViewTerm0" value="FALSE"/>
    <att type="real" name="Term PValue Corrected with Bonferroni0" value="0.5240630768080357"/>
    <att type="real" name="Term PValue0" value="0.0035172018577720515"/>
    <att type="string" name="canonicalName" value="GO:00507760"/>
    <graphics type="ELLIPSE" h="30.000244140625" w="30.0" x="947.0" y="935.0" fill="#02068d" width="1" outline="#000000"/>
  </node>
  <node label="GO:00485850" id="-195">
    <att type="real" name="% Associated Genes0" value="5.55555534362793"/>
    <att type="string" name="All Associated Genes0" value="[ABCG36, AHL25, AIP2, AT1G14920, AT1G22920, AT1G50640, AT1G66340, AT1G66350, AT1G71230, AT1G74710, AT2G01570, AT2G20180, AT2G25490, AT2G39940, AT2G46340, AT3G02140, AT3G03450, AT3G07650, AT3G11540, AT3G15210, AT3G48040, AT3G59380, AT3G61190, AT4G01060, AT4G05420, AT4G18470, AT4G26080, AT4G39030, AT5G01810, AT5G03730, AT5G04240, AT5G08335, AT5G10720, AT5G23320, AT5G25350, AT5G35620, AT5G46210, AT5G57050, AT5G60410, AT5G64750, AT5G65050, ATHB-6, ATL62, At1g08260, At1g77470, At2g26070, At2g39550, At4g37460/F6G17_110, At5g09230, At5g48380, CPR30, DOR, DWA1, DWA2, EIN2, EIN4, ERS1, ERS2, ETR2, F22O6_190, GLIP2, JAR1, MLO2, NAC002, PKL, PP2CA, PYK10, RIN4, SAL1, SYP121, SYP122, shw1]"/>
    <att type="string" name="Associated Genes Found0" value="[AT2G25490, AT4G01060, AT4G26080, AT5G57050]"/>
    <att type="string" name="GOGroups0" value="[Group11, Group5]"/>
    <att type="string" name="GOID0" value="GO:0048585"/>
    <att type="string" name="GOLevels0" value="[4]"/>
    <att type="string" name="GOTerm0" value="negative regulation of response to stimulus"/>
    <att type="string" name="Group PValue Corrected with Bonferroni0" value="{Group11=1.5686285002411636E-22, Group5=2.6136523534972203E-9}"/>
    <att type="string" name="Group PValue0" value="{Group11=9.227226472006844E-24, Group5=1.5374425608807179E-10}"/>
    <att type="integer" name="Nr. Genes0" value="4"/>
    <att type="string" name="Ontology Source0" value="GO_BiologicalProcess_05.05.2011_16h22"/>
    <att type="string" name="OverViewTerm0" value="FALSE"/>
    <att type="real" name="Term PValue Corrected with Bonferroni0" value="1.0"/>
    <att type="real" name="Term PValue0" value="0.016862643674382616"/>
    <att type="string" name="canonicalName" value="GO:00485850"/>
    <graphics type="ELLIPSE" h="30.0" w="30.0" x="743.5106811523438" y="639.9202880859375" fill="#02068d" width="1" outline="#000000"/>
  </node>
  <node label="GO:00485830" id="-194">
    <att type="real" name="% Associated Genes0" value="5.1724138259887695"/>
    <att type="string" name="All Associated Genes0" value="[ABCG36, ABCI8, AGD13, AGD4, AHL25, AIP2, ASHH2, AT1G02450, AT1G04830, AT1G07745, AT1G08680, AT1G14920, AT1G17440, AT1G22920, AT1G28200, AT1G33520, AT1G43700, AT1G50640, AT1G66340, AT1G66350, AT1G71230, AT1G74710, AT1G80680, AT1G80840, AT2G01570, AT2G04550, AT2G18790, AT2G18950, AT2G20180, AT2G21150, AT2G22330, AT2G22630, AT2G24790, AT2G25000, AT2G25490, AT2G33835, AT2G35210, AT2G37290, AT2G37550, AT2G39280, AT2G39940, AT2G43490, AT2G43790, AT2G46340, AT3G02140, AT3G03450, AT3G07490, AT3G07650, AT3G11540, AT3G13550, AT3G15210, AT3G16360, AT3G17660, AT3G18690, AT3G21510, AT3G26830, AT3G29350, AT3G43300, AT3G43810, AT3G45640, AT3G48040, AT3G50500, AT3G53710, AT3G55530, AT3G59380, AT3G61190, AT4G01060, AT4G02440, AT4G05420, AT4G09570, AT4G11260, AT4G12720, AT4G13730, AT4G15900, AT4G17890, AT4G18470, AT4G19660, AT4G21160, AT4G24540, AT4G25230, AT4G26080, AT4G31800, AT4G33680, AT4G37000, AT4G39030, AT4g22300, AT5G01810, AT5G03730, AT5G04240, AT5G06100, AT5G08335, AT5G10720, AT5G11260, AT5G13080, AT5G13220, AT5G23320, AT5G23570, AT5G25350, AT5G35620, AT5G39340, AT5G40990, AT5G46210, AT5G46750, AT5G47220, AT5G51450, AT5G52200, AT5G52580, AT5G53000, AT5G54310, AT5G57050, AT5G59890, AT5G60410, AT5G61980, AT5G64750, AT5G65050, AT5G66880, ATCDPK2, ATHB-6, ATL62, ATMKK3, ATRAD17, At1g01960, At1g04450, At1g08260, At1g14000, At1g25540, At1g52920, At1g71220, At1g77470, At1g78600, At2g14490, At2g25620, At2g26070, At2g31800, At2g32460, At2g39550, At2g43850, At3g05360, At3g05480, At3g06110/F28L1_5, At3g13226, At4g04920, At4g16990, At4g18950, At4g20380, At4g23450, At4g32630, At4g37460/F6G17_110, At5g09230, At5g18200, At5g22330, At5g37190, At5g39500, At5g48380, At5g52200, BGLU18, BT2, CALS12, CPR30, CRT3, DOR, DWA1, DWA2, EFR, EIN2, EIN4, ERS1, ERS2, ETR2, F14G92, F20D1020, F22O6_190, F23E120, F24G1600, F24J70, F7K15_150, F9N110, FMO1, GH32, GI, GID1A, GID1B, GID1C, GLIP2, GN, GP ALPHA 1, ILL5, ILL6, INO80, JAR1, KIN11, MLO2, MMS21, MOS4, NAC002, NP_001154777, NUDT6, PBA1, PED1, PKL, PLDALPHA1, PMRT15, PP2AA1, PP2CA, PYK10, PYL8, RAP1, RHA2A, RIN4, RPS4, SAL1, SAS1, SFC, SGT1A, SNE, SOBIR1, SPX3, SSP, SYP121, SYP122, T20N10_110, T22K7_10, T4C21_270, T9E80, TTL1, VTE1, WRKY53, WRKY54, WRKY58, WRKY70, erd2, shw1]"/>
    <att type="string" name="Associated Genes Found0" value="[AT1G02450, AT2G22330, AT2G25490, AT3G26830, AT3G45640, AT3G50500, AT4G01060, AT4G26080, AT4G31800, AT5G13080, AT5G13220, AT5G57050]"/>
    <att type="string" name="GOGroups0" value="[Group11, Group16, Group5]"/>
    <att type="string" name="GOID0" value="GO:0048583"/>
    <att type="string" name="GOLevels0" value="[3]"/>
    <att type="string" name="GOTerm0" value="regulation of response to stimulus"/>
    <att type="string" name="Group PValue Corrected with Bonferroni0" value="{Group11=1.5686285002411636E-22, Group16=6.128750210897452E-6, Group5=2.6136523534972203E-9}"/>
    <att type="string" name="Group PValue0" value="{Group11=9.227226472006844E-24, Group16=3.605147182880854E-7, Group5=1.5374425608807179E-10}"/>
    <att type="integer" name="Nr. Genes0" value="12"/>
    <att type="string" name="Ontology Source0" value="GO_BiologicalProcess_05.05.2011_16h22"/>
    <att type="string" name="OverViewTerm0" value="FALSE"/>
    <att type="real" name="Term PValue Corrected with Bonferroni0" value="0.012701034110614542"/>
    <att type="real" name="Term PValue0" value="8.524183966855397E-5"/>
    <att type="string" name="canonicalName" value="GO:00485830"/>
    <graphics type="ELLIPSE" h="50.000244140625" w="50.0" x="877.46875" y="769.7236328125" fill="#02068d" width="1" outline="#000000"/>
  </node>
  <node label="GO:00485820" id="-193">
    <att type="real" name="% Associated Genes0" value="4.761904716491699"/>
    <att type="string" name="All Associated Genes0" value="[ABCC1, AT1G26830, AT1G62380, AT1G65480, AT1G68050, AT2G19450, AT2G22630, AT2G33810, AT2G34900, AT2G43410, AT2G45650, AT2G45660, AT4G15880, AT4G20370, AT4G25530, AT4G35900, AT4G39400, AT5G05690, AT5G13910, AT5G24860, AT5G41990, AT5G60910, AT5G62000, ATJ3, At1g10670, At3g03090, At3g04610, At3g22590, At4g04885, At4g22140, At4g24620, At5g08370, At5g55390, BHLH63, BHLH76, CAL, CRY2, EPFL9, GI, MFT, VAL1, VAL2]"/>
    <att type="string" name="Associated Genes Found0" value="[AT1G62380, AT5G41990]"/>
    <att type="string" name="GOGroups0" value="[Group7, Group8]"/>
    <att type="string" name="GOID0" value="GO:0048582"/>
    <att type="string" name="GOLevels0" value="[5, 6]"/>
    <att type="string" name="GOTerm0" value="positive regulation of post-embryonic development"/>
    <att type="string" name="Group PValue Corrected with Bonferroni0" value="{Group7=0.005947125430452599, Group8=1.9149650656212817E-4}"/>
    <att type="string" name="Group PValue0" value="{Group7=3.498309076736823E-4, Group8=1.126450038600754E-5}"/>
    <att type="integer" name="Nr. Genes0" value="2"/>
    <att type="string" name="Ontology Source0" value="GO_BiologicalProcess_05.05.2011_16h22"/>
    <att type="string" name="OverViewTerm0" value="FALSE"/>
    <att type="real" name="Term PValue Corrected with Bonferroni0" value="1.0"/>
    <att type="real" name="Term PValue0" value="0.11195435538772656"/>
    <att type="string" name="canonicalName" value="GO:00485820"/>
    <graphics type="ELLIPSE" h="30.0" w="30.0" x="1623.615234375" y="1053.64453125" fill="#fed31a" width="1" outline="#000000"/>
  </node>
  <node label="GO:00485800" id="-192">
    <att type="real" name="% Associated Genes0" value="4.44444465637207"/>
    <att type="string" name="All Associated Genes0" value="[ABCC1, ARIA, ASHH2, AT1G02580, AT1G13260, AT1G14400, AT1G14920, AT1G20450, AT1G22920, AT1G26830, AT1G27320, AT1G43850, AT1G45050, AT1G51660, AT1G53160, AT1G62380, AT1G65480, AT1G68050, AT1G71230, AT2G01570, AT2G18790, AT2G19450, AT2G20180, AT2G20570, AT2G20875, AT2G21150, AT2G22540, AT2G22630, AT2G24790, AT2G25930, AT2G33810, AT2G34900, AT2G35670, AT2G36270, AT2G39940, AT2G43410, AT2G43790, AT2G45190, AT2G45650, AT2G45660, AT2G46340, AT3G03450, AT3G05040, AT3G07650, AT3G13550, AT3G15270, AT3G18990, AT3G20740, AT3G33520, AT3G43810, AT3G45640, AT3G50500, AT3G51770, AT3G54720, AT4G00650, AT4G02440, AT4G05420, AT4G15880, AT4G16280, AT4G20370, AT4G20910, AT4G25530, AT4G35900, AT4G36930, AT4G39400, AT5G03730, AT5G03840, AT5G04240, AT5G05690, AT5G10140, AT5G10510, AT5G11260, AT5G11530, AT5G13480, AT5G13910, AT5G15840, AT5G16260, AT5G17690, AT5G23150, AT5G24860, AT5G35750, AT5G41990, AT5G44190, AT5G45830, AT5G46210, AT5G49160, AT5G51230, AT5G55630, AT5G60410, AT5G60910, AT5G62000, AT5G65050, AT5G66880, ATE1, ATJ3, ATL62, ATX1, At1g03790, At1g08260, At1g10670, At1g16060, At1g25540, At1g30970, At1g52740, At1g54060, At1g61040, At1g78600, At1g79730, At2g03070, At2g35230, At2g38560, At2g38810, At2g40080, At2g42160, At3g03090, At3g04610, At3g11240, At3g22590, At4g04885, At4g04920, At4g20400, At4g22140, At4g24620, At5g08370, At5g22290, At5g37055, At5g37190, At5g37260, At5g42400, At5g55390, At5g61150, At5g65070, At5g65080, BHLH63, BHLH76, BRIZ2, CAL, CML23, COL1, COL2, CRN, CRY2, ELF8, EPF2, EPFL9, F14L2_150, F27B130, F28J1210, F9N110, FYPP3, GATA21, GATA22, GI, GTL1, HSR2, KNU, MAF1, MAF3, MFT, MSI1, NUA, PAN, PHO1-H4, PIE1, PKL, PMRT15, PRMT13, PRMT14, RPN10, SOBIR1, SUC9, T1E22_60, TCH2, TCP14, ULT1, VAL1, VAL2, VRN5, WOL, shw1]"/>
    <att type="string" name="Associated Genes Found0" value="[AT1G20450, AT1G53160, AT1G62380, AT2G45190, AT3G45640, AT3G50500, AT5G41990, AT5G44190]"/>
    <att type="string" name="GOGroups0" value="[Group6, Group7, Group8]"/>
    <att type="string" name="GOID0" value="GO:0048580"/>
    <att type="string" name="GOLevels0" value="[5]"/>
    <att type="string" name="GOTerm0" value="regulation of post-embryonic development"/>
    <att type="string" name="Group PValue Corrected with Bonferroni0" value="{Group6=0.005947125430452599, Group7=0.005947125430452599, Group8=1.9149650656212817E-4}"/>
    <att type="string" name="Group PValue0" value="{Group6=3.498309076736823E-4, Group7=3.498309076736823E-4, Group8=1.126450038600754E-5}"/>
    <att type="integer" name="Nr. Genes0" value="8"/>
    <att type="string" name="Ontology Source0" value="GO_BiologicalProcess_05.05.2011_16h22"/>
    <att type="string" name="OverViewTerm0" value="FALSE"/>
    <att type="real" name="Term PValue Corrected with Bonferroni0" value="0.49792490111374377"/>
    <att type="real" name="Term PValue0" value="0.0033417778598237836"/>
    <att type="string" name="canonicalName" value="GO:00485800"/>
    <graphics type="ELLIPSE" h="30.0" w="30.0" x="1689.99609375" y="984.47265625" fill="#6eee80" width="1" outline="#000000"/>
  </node>
  <node label="GO:00485320" id="-191">
    <att type="real" name="% Associated Genes0" value="5.714285850524902"/>
    <att type="string" name="All Associated Genes0" value="[AT1G15750, AT1G20700, AT1G52150, AT1G69120, AT1G72560, AT2G25700, AT2G34710, AT2G45190, AT3G50660, AT4G32880, AT5G16780, AT5G60690, AT5G64630, ATHB-9, At1g13870, At2g45450, At5g46700, At5g51430, At5g55540, CDC27B, F14L2_150, F3C22_170, NAC021, NAC031, NAC054, NAC098, OBE1, OBE2, PIN1, RPT2A, SKP1, SPL10, SUB, TOP1ALPHA, TSK]"/>
    <att type="string" name="Associated Genes Found0" value="[AT1G15750, AT2G45190]"/>
    <att type="string" name="GOGroups0" value="[Group15]"/>
    <att type="string" name="GOID0" value="GO:0048532"/>
    <att type="string" name="GOLevels0" value="[2, 3, 4]"/>
    <att type="string" name="GOTerm0" value="anatomical structure arrangement"/>
    <att type="string" name="Group PValue Corrected with Bonferroni0" value="{Group15=7.871587599059506E-7}"/>
    <att type="string" name="Group PValue0" value="{Group15=4.6303456465055917E-8}"/>
    <att type="integer" name="Nr. Genes0" value="2"/>
    <att type="string" name="Ontology Source0" value="GO_BiologicalProcess_05.05.2011_16h22"/>
    <att type="string" name="OverViewTerm0" value="FALSE"/>
    <att type="real" name="Term PValue Corrected with Bonferroni0" value="1.0"/>
    <att type="real" name="Term PValue0" value="0.08221838357765038"/>
    <att type="string" name="canonicalName" value="GO:00485320"/>
    <graphics type="ELLIPSE" h="30.0" w="30.0" x="1269.95068359375" y="1518.9227294921875" fill="#9c0e2d" width="1" outline="#000000"/>
  </node>
  <node label="GO:00485230" id="-190">
    <att type="real" name="% Associated Genes0" value="4.265402793884277"/>
    <att type="string" name="All Associated Genes0" value="[AHL21, AHL25, AIP2, AMC2, AT1G02450, AT1G02580, AT1G02970, AT1G08860, AT1G14920, AT1G19050, AT1G20330, AT1G24190, AT1G30210, AT1G43700, AT1G47870, AT1G49620, AT1G50640, AT1G51190, AT1G54160, AT1G59750, AT1G61720, AT1G63020, AT1G66340, AT1G66350, AT1G69120, AT2G01570, AT2G22540, AT2G23430, AT2G25490, AT2G27040, AT2G29890, AT2G32940, AT2G36490, AT2G39810, AT2G41560, AT2G41740, AT2G43410, AT2G43640, AT2G44810, AT3G01320, AT3G02140, AT3G03450, AT3G11540, AT3G15210, AT3G15850, AT3G20840, AT3G24140, AT3G24810, AT3G26790, AT3G48040, AT3G48160, AT3G57330, AT3G57410, AT3G59380, AT4G01060, AT4G03190, AT4G05420, AT4G15900, AT4G16280, AT4G16780, AT4G18960, AT4G24540, AT4G24960, AT4G26080, AT4G30160, AT4G32551, AT4G33495, AT4G36220, AT4G38130, AT4G38620, AT4G40060, AT5G01810, AT5G02030, AT5G03730, AT5G03840, AT5G08335, AT5G08550, AT5G10480, AT5G10720, AT5G13060, AT5G13240, AT5G15380, AT5G17690, AT5G23150, AT5G23320, AT5G25350, AT5G43810, AT5G47120, AT5G48820, AT5G54500, AT5G57050, AT5G57740, AT5G62000, AT5G64750, ATH1, ATHB-6, ATRBOH F, At1g02120, At1g14410, At1g26110, At1g65770, At1g71790, At1g74660, At2g26070, At2g30280, At2g32700, At2g33560, At2g39550, At2g47210, At3g02820/F13E7_24, At3g05520, At3g19590, At4g17580, At4g24670, At4g28110, At4g37460/F6G17_110, At5g09230, At5g26230, At5g40530, At5g42750, At5g44610/K15C23_5, At5g47130, At5g55760, At5g63780, AtATRIP, BLH8, CDKF-1, CHR1, CMT3, CPL1, DEGP7, DGL, DOF5, DOR, DRT112, DWA1, DWA2, EIN4, ERS1, ERS2, ETR2, F13E74, F18A540, FAD6, GLIP2, GRXC7, GRXC8, GTL1, HAG2, HD2B, ICK6, KRP2, KRP4, KRP6, MAD2, MEE58, MGL2, MOM1, MSBP1, MSH2, NAC002, NAC054, NFYA4, NFYA7, NFYA9, NUA, OBE1, OBE2, OSB1, PAP12, PKL, PLL1, PME18, POL, PP2CA, PSBO1, PSBO2, PUB44, RBOHD, RIN4, RING1A, RING1B, RNS2, RPT2A, SAL1, SAS1, SEP4, SHM1, SKP1, SRP14, SRP9, SUVH5, SYP121, SYP122, T13K140, T27I15_140, T29H11_50, T32M21_70, T5E8_30, T8P1980, TAA1, TOP1ALPHA, TPST, VAR1, VAR2, WRKY27, WRKY42, WRKY6, WUS, bHLH delta, dl4825c]"/>
    <att type="string" name="Associated Genes Found0" value="[AT1G02450, AT2G25490, AT2G27040, AT3G15850, AT4G01060, AT4G26080, AT5G10480, AT5G54500, AT5G57050]"/>
    <att type="string" name="GOGroups0" value="[Group10, Group11, Group5]"/>
    <att type="string" name="GOID0" value="GO:0048523"/>
    <att type="string" name="GOLevels0" value="[4]"/>
    <att type="string" name="GOTerm0" value="negative regulation of cellular process"/>
    <att type="string" name="Group PValue Corrected with Bonferroni0" value="{Group10=0.006736712397954536, Group11=1.5686285002411636E-22, Group5=2.6136523534972203E-9}"/>
    <att type="string" name="Group PValue0" value="{Group10=3.962771998796786E-4, Group11=9.227226472006844E-24, Group5=1.5374425608807179E-10}"/>
    <att type="integer" name="Nr. Genes0" value="9"/>
    <att type="string" name="Ontology Source0" value="GO_BiologicalProcess_05.05.2011_16h22"/>
    <att type="string" name="OverViewTerm0" value="TRUE"/>
    <att type="real" name="Term PValue Corrected with Bonferroni0" value="0.37245130515721414"/>
    <att type="real" name="Term PValue0" value="0.0024996731889745916"/>
    <att type="string" name="canonicalName" value="GO:00485230"/>
    <graphics type="ELLIPSE" h="29.999969482421875" w="30.0" x="1080.8480224609375" y="494.28651428222656" fill="#8be2c9" width="1" outline="#000000"/>
  </node>
  <node label="GO:00485220" id="-189">
    <att type="real" name="% Associated Genes0" value="4.6875"/>
    <att type="string" name="All Associated Genes0" value="[AMC5, AMSH3, ASHH2, AT1G02170, AT1G09530, AT1G14790, AT1G21600, AT1G28300, AT1G29170, AT1G45249, AT1G57820, AT1G62180, AT1G65470, AT1G66050, AT1G69120, AT1G73840, AT2G20570, AT2G22640, AT2G23430, AT2G29890, AT2G33880, AT2G34150, AT2G36270, AT2G36490, AT2G42680, AT2G46410, AT3G01470, AT3G08720, AT3G08730, AT3G11440, AT3G24140, AT3G24500, AT3G26744, AT3G26790, AT3G50500, AT3G55530, AT3G58680, AT3G60390, AT3G61890, AT4G09570, AT4G11280, AT4G25230, AT4G32880, AT4G40060, AT5G06100, AT5G08565, AT5G11260, AT5G18410, AT5G22220, AT5G22260, AT5G24630, AT5G39550, AT5G44190, AT5G45980, AT5G47220, AT5G51450, AT5G65310, AT5G66880, ATCDPK2, ATHB-51, ATHB-6, ATHSFA2, ATL55, At1g04450, At1g08260, At1g13710, At1g13950, At1g25540, At1g26630, At1g43860/F28H191, At1g53130, At1g61040, At1g65660, At1g67810, At1g69410, At1g71930, At1g73500/T9L24_8, At1g75500, At2g02540, At2g32460, At2g34210, At2g34640, At2g35530, At2g46225, At2g46240, At2g48070, At3g09210, At3g10800, At3g23980, At4g08350, At4g23450, At4g37120, At5g05970, At5g08565, At5g18200, At5g48930, At5g50210, At5g62380, At5g63670, BGLU18, BHLH54, BRN1, BRN2, CDKA-1, CHR1, CPL2, DEL2, DOF3, DOF5, DPBF2, E2FA, EIN2, ELF8, ERABP1, F18K100, F24M1200, F27K19_170, FEZ, FH3, FH5, FH8, FZR1, GAT1, GATA12, GATA2, GATA3, GATA4, GATA5, GATA6, GATA7, GATA8, GATA9, GCN5, GH32, GID1A, GID1B, GID1C, GP ALPHA 1, INO80, IRX1, K22G18, MAP65-1, MAP65-6, MMS21, MSI1, NAC012, NAC043, NAC066, NAC078, NAC69, NAP1, NFYB6, NFYB9, NFYC1, NFYC2, NPR6, NP_182035, NUDT6, PED1, PLDALPHA1, PP2AA1, PTAC2, PYL8, Q42021, RABG3B, RAP1, REP, RGF1, RGF2, RGF4, RGF5, RGF6, RGF7, RGF9, RHA2A, SAL1, SCAR2, SCAR4, SCL14, SKP2A, SMB, SOBIR1, SPX3, SSP, SUB, TTL1, WOX2, WRKY53, ZAP1, rgf3, sig, swp1]"/>
    <att type="string" name="Associated Genes Found0" value="[AT1G73840, AT2G42680, AT3G08720, AT3G50500, AT3G60390, AT3G61890, AT4G11280, AT5G18410, AT5G44190]"/>
    <att type="string" name="GOGroups0" value="[Group6, Group9]"/>
    <att type="string" name="GOID0" value="GO:0048522"/>
    <att type="string" name="GOLevels0" value="[4]"/>
    <att type="string" name="GOTerm0" value="positive regulation of cellular process"/>
    <att type="string" name="Group PValue Corrected with Bonferroni0" value="{Group6=0.005947125430452599, Group9=0.011180158214547965}"/>
    <att type="string" name="Group PValue0" value="{Group6=3.498309076736823E-4, Group9=6.57656365561645E-4}"/>
    <att type="integer" name="Nr. Genes0" value="9"/>
    <att type="string" name="Ontology Source0" value="GO_BiologicalProcess_05.05.2011_16h22"/>
    <att type="string" name="OverViewTerm0" value="TRUE"/>
    <att type="real" name="Term PValue Corrected with Bonferroni0" value="0.19542025525124845"/>
    <att type="real" name="Term PValue0" value="0.001311545337256701"/>
    <att type="string" name="canonicalName" value="GO:00485220"/>
    <graphics type="ELLIPSE" h="30.0001220703125" w="30.0001220703125" x="1770.2051391601562" y="694.2950439453125" fill="#6eee80" width="1" outline="#000000"/>
  </node>
  <node label="GO:00485180" id="-188">
    <att type="real" name="% Associated Genes0" value="4.029304027557373"/>
    <att type="string" name="All Associated Genes0" value="[ABCC1, AMC5, AMSH3, ASHH2, AT1G02170, AT1G09530, AT1G14790, AT1G21600, AT1G26830, AT1G28300, AT1G29170, AT1G33520, AT1G45249, AT1G57820, AT1G62180, AT1G62380, AT1G65470, AT1G65480, AT1G66050, AT1G68050, AT1G69120, AT1G73840, AT1G80680, AT2G19450, AT2G20570, AT2G22630, AT2G22640, AT2G23430, AT2G29890, AT2G33810, AT2G33835, AT2G33880, AT2G34150, AT2G34900, AT2G36270, AT2G36490, AT2G42680, AT2G43410, AT2G43790, AT2G45650, AT2G45660, AT2G46410, AT3G01470, AT3G08720, AT3G08730, AT3G11440, AT3G15210, AT3G18690, AT3G21840, AT3G24140, AT3G24500, AT3G26744, AT3G26790, AT3G50500, AT3G55530, AT3G58680, AT3G60390, AT3G61890, AT4G09570, AT4G11280, AT4G12720, AT4G15880, AT4G15900, AT4G20370, AT4G24540, AT4G25230, AT4G25530, AT4G32880, AT4G35900, AT4G39400, AT4G40060, AT5G05690, AT5G06100, AT5G08565, AT5G11260, AT5G13910, AT5G18410, AT5G22220, AT5G22260, AT5G24630, AT5G24860, AT5G39550, AT5G40990, AT5G41990, AT5G44190, AT5G45980, AT5G47220, AT5G51450, AT5G57390, AT5G59890, AT5G60410, AT5G60910, AT5G62000, AT5G65310, AT5G66880, ATCDPK2, ATHB-51, ATHB-6, ATHSFA2, ATJ3, ATL55, ATMKK3, At1g04450, At1g08260, At1g10670, At1g13710, At1g13950, At1g25540, At1g26630, At1g43860/F28H191, At1g53130, At1g61040, At1g65660, At1g67810, At1g69410, At1g71220, At1g71930, At1g73500/T9L24_8, At1g75500, At2g02540, At2g29950, At2g32460, At2g34210, At2g34640, At2g35530, At2g40080, At2g44680, At2g46225, At2g46240, At2g48070, At3g03090, At3g04610, At3g05360, At3g09210, At3g10800, At3g22590, At3g23980, At3g59900, At4g04885, At4g08350, At4g22140, At4g23450, At4g24620, At4g37120, At5g05160, At5g05970, At5g08370, At5g08565, At5g18200, At5g48930, At5g50210, At5g55390, At5g62380, At5g63670, BGLU18, BHLH54, BHLH63, BHLH76, BRN1, BRN2, CAL, CALS12, CDKA-1, CHR1, CPL2, CRT3, CRY2, CXIP4, DEL2, DOF3, DOF5, DPBF2, E2FA, EFR, EIN2, ELF8, EPFL9, ERABP1, F14G92, F18K100, F24J70, F24M1200, F27K19_170, FEZ, FH3, FH5, FH8, FMO1, FZR1, GAT1, GATA12, GATA2, GATA3, GATA4, GATA5, GATA6, GATA7, GATA8, GATA9, GCN5, GH32, GI, GID1A, GID1B, GID1C, GP ALPHA 1, INO80, IRX1, JAR1, K22G18, MAP65-1, MAP65-6, MFT, MMS21, MOS4, MSI1, NAC012, NAC043, NAC066, NAC078, NAC69, NAP1, NFYB6, NFYB9, NFYC1, NFYC2, NPR6, NP_182035, NUDT6, PED1, PLDALPHA1, PLDEPSILON, PMRT15, PP2AA1, PTAC2, PYL8, Q42021, QSOX1, RABG3B, RAP1, REP, RGF1, RGF2, RGF4, RGF5, RGF6, RGF7, RGF9, RHA2A, RIN4, RPS4, SAL1, SCAR2, SCAR4, SCL14, SKP2A, SMB, SOBIR1, SPX3, SSP, SUB, T18I3, TTL1, VAL1, VAL2, WOX2, WRKY53, WRKY70, ZAP1, erd2, rgf3, sig, swp1]"/>
    <att type="string" name="Associated Genes Found0" value="[AT1G62380, AT1G73840, AT2G42680, AT3G08720, AT3G50500, AT3G60390, AT3G61890, AT4G11280, AT5G18410, AT5G41990, AT5G44190]"/>
    <att type="string" name="GOGroups0" value="[Group6, Group7]"/>
    <att type="string" name="GOID0" value="GO:0048518"/>
    <att type="string" name="GOLevels0" value="[3]"/>
    <att type="string" name="GOTerm0" value="positive regulation of biological process"/>
    <att type="string" name="Group PValue Corrected with Bonferroni0" value="{Group6=0.005947125430452599, Group7=0.005947125430452599}"/>
    <att type="string" name="Group PValue0" value="{Group6=3.498309076736823E-4, Group7=3.498309076736823E-4}"/>
    <att type="integer" name="Nr. Genes0" value="11"/>
    <att type="string" name="Ontology Source0" value="GO_BiologicalProcess_05.05.2011_16h22"/>
    <att type="string" name="OverViewTerm0" value="TRUE"/>
    <att type="real" name="Term PValue Corrected with Bonferroni0" value="0.20243265024652676"/>
    <att type="real" name="Term PValue0" value="0.001358608390916287"/>
    <att type="string" name="canonicalName" value="GO:00485180"/>
    <graphics type="ELLIPSE" h="29.9998779296875" w="29.9998779296875" x="1658.6902465820312" y="936.780517578125" fill="#6eee80" width="1" outline="#000000"/>
  </node>
  <node label="GO:00467000" id="-186">
    <att type="real" name="% Associated Genes0" value="6.756756782531738"/>
    <att type="string" name="All Associated Genes0" value="[ABCG36, AT2G18960, AT2G22330, AT2G26550, AT2G43130, AT3G44880, AT3G54840, AT4G33650, AT4G35020, AT4G37000, AT4G39950, AT4g04955, AT4g39520, AT5G13800, AT5G42080, AT5G44070, AT5G62530, ATK3, ATK4, ATNAP11, At1g17470, At1g52980, At1g58300, At1g69720, At2g26670, At2g35820, At3g63150, At5g18570, At5g18860, At5g43600, At5g45930, At5g64813, BGLU26, CHLI, CHR1, CLH1, CLH2, ETFB, F7H1900, FTSZ1, FTSZ2-1, FTSZ2-2, GP ALPHA 1, HMA1, HO3, HSP90-2, MIND1, NOA1, NOL, NP_180223, NUDT25, NYC1, PHO2, POX1, POX2, PPD, PYD1A, PYD2, PYD3, RABA1A, RH14, RH39, T9E80, TED4, TOC159, TOC33, TOC34, URH1, URH2, VAR1, XDH1, ZWI, cda1, ylbA]"/>
    <att type="string" name="Associated Genes Found0" value="[AT2G22330, AT3G44880, AT4G39950, AT5G13800, AT5G44070]"/>
    <att type="string" name="GOGroups0" value="[Group11, Group8]"/>
    <att type="string" name="GOID0" value="GO:0046700"/>
    <att type="string" name="GOLevels0" value="[4]"/>
    <att type="string" name="GOTerm0" value="heterocycle catabolic process"/>
    <att type="string" name="Group PValue Corrected with Bonferroni0" value="{Group11=1.5686285002411636E-22, Group8=1.9149650656212817E-4}"/>
    <att type="string" name="Group PValue0" value="{Group11=9.227226472006844E-24, Group8=1.126450038600754E-5}"/>
    <att type="integer" name="Nr. Genes0" value="5"/>
    <att type="string" name="Ontology Source0" value="GO_BiologicalProcess_05.05.2011_16h22"/>
    <att type="string" name="OverViewTerm0" value="FALSE"/>
    <att type="real" name="Term PValue Corrected with Bonferroni0" value="0.5062222983022506"/>
    <att type="real" name="Term PValue0" value="0.00339746508927685"/>
    <att type="string" name="canonicalName" value="GO:00467000"/>
    <graphics type="ELLIPSE" h="30.0" w="30.0" x="999.1376953125" y="1122.3388671875" fill="#02068d" width="1" outline="#000000"/>
  </node>
  <node label="GO:00464170" id="-185">
    <att type="real" name="% Associated Genes0" value="9.523809432983398"/>
    <att type="string" name="All Associated Genes0" value="[AT1G08250, AT1G11790, AT1G29410, AT2G27820, AT2G29690, AT3G07630, AT3G29200, AT3G44720, AT4G27070, AT4G39980, AT5G05590, AT5G05730, AT5G22630, AT5G48150, ATR1, At1g07780, At1g22410, At1g29410, At1g69370/F23O10_5, At2g04400, At2g21940, At2g28880, At2g45300, At3g55870, At4g33510, At4g39540/F23K16_170, At5g38530, At5g66120, BIG, CM2, CYP83B1, DHS2, EMB1144, F27K19_50, GCR1, GP ALPHA 1, MEE32, PAT, T24P22, TSB1, TYRAAT1, TYRAAT2]"/>
    <att type="string" name="Associated Genes Found0" value="[AT3G44720, AT4G27070, AT4G39980, AT5G05730]"/>
    <att type="string" name="GOGroups0" value="[Group11, Group2]"/>
    <att type="string" name="GOID0" value="GO:0046417"/>
    <att type="string" name="GOLevels0" value="[7]"/>
    <att type="string" name="GOTerm0" value="chorismate metabolic process"/>
    <att type="string" name="Group PValue Corrected with Bonferroni0" value="{Group11=1.5686285002411636E-22, Group2=2.667419925045739E-10}"/>
    <att type="string" name="Group PValue0" value="{Group11=9.227226472006844E-24, Group2=1.5690705441445522E-11}"/>
    <att type="integer" name="Nr. Genes0" value="4"/>
    <att type="string" name="Ontology Source0" value="GO_BiologicalProcess_05.05.2011_16h22"/>
    <att type="string" name="OverViewTerm0" value="FALSE"/>
    <att type="real" name="Term PValue Corrected with Bonferroni0" value="0.37503814447966805"/>
    <att type="real" name="Term PValue0" value="0.0025170345267091815"/>
    <att type="string" name="canonicalName" value="GO:00464170"/>
    <graphics type="ELLIPSE" h="30.0" w="30.0" x="450.0" y="974.0" fill="#02068d" width="1" outline="#000000"/>
  </node>
  <node label="GO:00463950" id="-184">
    <att type="real" name="% Associated Genes0" value="8.974358558654785"/>
    <att type="string" name="All Associated Genes0" value="[ALAAT1, AT1G03000, AT1G06290, AT1G06570, AT1G79440, AT1G79810, AT2G16500, AT2G22330, AT2G26350, AT3G07560, AT3G47340, AT3G51840, AT3g04520/T27C4_17, AT4G16760, AT4G34710, AT4G39660, AT4G39950, AT5G04230, AT5G13790, AT5G25760, AT5G37830, AT5G54080, AT5G62530, AT5G64813, AT5G65110, At1g02400, At1g08630, At1g32470, At1g47990, At1g60990, At1g64660/F1N193, At1g65520, At1g75980, At2g30650, At2g30660, At2g35120, At2g43400, At3g01420/T13O15, At3g05290, At3g21780, At3g22200, At4g12130, At4g29210, At4g33010, At4g39640, At4g39650, At5g27520, At5g36160, At5g42890, At5g43280, At5g46180, At5g63910, BCAT1, CHY1, CYP707A3, ECH2, ETFB, F28J1220, F28J1230, GDCSH, GDCST, MCCA, MCCB, MFP2, PAL1, PAL2, PAL3, PAL4, PED1, PEX1, PEX12, PHYLLO, POX1, POX2, Q9LQR9, SDH, dl3255c, dl3260c]"/>
    <att type="string" name="Associated Genes Found0" value="[AT2G22330, AT3G47340, AT3G51840, AT4G16760, AT4G39950, AT5G54080, AT5G65110]"/>
    <att type="string" name="GOGroups0" value="[Group11, Group2]"/>
    <att type="string" name="GOID0" value="GO:0046395"/>
    <att type="string" name="GOLevels0" value="[5, 6]"/>
    <att type="string" name="GOTerm0" value="carboxylic acid catabolic process"/>
    <att type="string" name="Group PValue Corrected with Bonferroni0" value="{Group11=1.5686285002411636E-22, Group2=2.667419925045739E-10}"/>
    <att type="string" name="Group PValue0" value="{Group11=9.227226472006844E-24, Group2=1.5690705441445522E-11}"/>
    <att type="integer" name="Nr. Genes0" value="7"/>
    <att type="string" name="Ontology Source0" value="GO_BiologicalProcess_05.05.2011_16h22"/>
    <att type="string" name="OverViewTerm0" value="FALSE"/>
    <att type="real" name="Term PValue Corrected with Bonferroni0" value="0.013909199035201717"/>
    <att type="real" name="Term PValue0" value="9.335032909531353E-5"/>
    <att type="string" name="canonicalName" value="GO:00463950"/>
    <graphics type="ELLIPSE" h="50.0" w="50.0" x="770.5068359375" y="889.0" fill="#02068d" width="1" outline="#000000"/>
  </node>
  <node label="GO:00463940" id="-183">
    <att type="real" name="% Associated Genes0" value="5.194805145263672"/>
    <att type="string" name="All Associated Genes0" value="[20ox1, 20ox2, 20ox3, 4CLL5, 4CLL7, 4CLL9, A0MF23, ACC2, ACL1, ACP-1, AK2, AK3, AKHSDH1, AKHSDH2, ARD1, ARD2, ARD3, AT1G01480, AT1G01610, AT1G02205, AT1G02860, AT1G04580, AT1G04640, AT1G05160, AT1G06080, AT1G07720, AT1G08250, AT1G11790, AT1G13280, AT1G14520, AT1G15550, AT1G16540, AT1G17745, AT1G19640, AT1G29410, AT1G30100, AT1G49430, AT1G51500, AT1G52340, AT1G53000, AT1G55020, AT1G55920, AT1G62180, AT1G73250, AT1G74710, AT1G76690, AT1G78390, AT1G80340, AT2G14750, AT2G15090, AT2G16370, AT2G18950, AT2G19800, AT2G22330, AT2G22810, AT2G26310, AT2G27150, AT2G27820, AT2G28630, AT2G29690, AT2G29980, AT2G31360, AT2G31810, AT2G32440, AT2G38110, AT2G39800, AT2G43090, AT2G43360, AT2G44810, AT2G45690, AT3G02580, AT3G07630, AT3G14440, AT3G15850, AT3G23940, AT3G24220, AT3G25760, AT3G25770, AT3G25780, AT3G25900, AT3G29200, AT3G44720, AT3G47340, AT3G49700, AT3G54010, AT3G59970, AT3G63250, AT4G00400, AT4G02780, AT4G04610, AT4G08040, AT4G11280, AT4G14720, AT4G14910, AT4G16760, AT4G18350, AT4G21990, AT4G22753, AT4G26200, AT4G26260, AT4G26483, AT4G26850, AT4G27070, AT4G29010, AT4G33950, AT4G34510, AT4G34570, AT4G36220, AT4G37770, AT4G39030, AT4G39940, AT4G39950, AT4G39980, AT4g13050, AT4g34200, AT5G03730, AT5G05590, AT5G05730, AT5G05920, AT5G10160, AT5G10240, AT5G10480, AT5G10920, AT5G13280, AT5G13520, AT5G15530, AT5G20960, AT5G22630, AT5G23020, AT5G23190, AT5G27380, AT5G37300, AT5G42650, AT5G43850, AT5G46240, AT5G46290, AT5G48150, AT5G49070, AT5G55120, AT5G56640, AT5G57800, AT5G64813, AT5G65010, AT5G65800, AT5G66230, ATR1, ATS1, ATSERAT1, ATSERAT2, A_TM021B04, At1g01280, At1g02205, At1g06090, At1g06100, At1g06120, At1g06350, At1g06360, At1g07420, At1g07780, At1g08510/T27G79, At1g08980, At1g09795/F21M129, At1g10670, At1g13950, At1g14290, At1g14810, At1g17745, At1g22410, At1g24360, At1g26630, At1g29410, At1g30120, At1g31860, At1g32440, At1g44090, At1g47578, At1g53520, At1g57750, At1g61850, At1g62640, At1g63660, At1g65290, At1g66200, At1g67070, At1g67080, At1g67730, At1g68320, At1g69370/F23O10_5, At1g69410, At1g69640, At1g79750, At1g79900, At1g80330, At1g80555, At2g03667, At2g04400, At2g05830, At2g05990, At2g14060, At2g17265, At2g17630, At2g19940, At2g21550, At2g21940, At2g22230, At2g22910, At2g26310, At2g26310/T1D16, At2g26560/T9J223, At2g28880, At2g29390, At2g30200, At2g31810, At2g37250, At2g37500, At2g37700, At2g44620, At2g45300, At2g46110, At2g46210, At3g03630, At3g10030, At3g12990, At3g18680, At3g19480, At3g22425, At3g22460, At3g23940, At3g25110, At3g45770, At3g53180/T4D210, At3g55610, At3g55870, At3g57050, At3g58180, At3g58610, At4g04320, At4g12110, At4g14710, At4g14910, At4g22753, At4g22756, At4g24670, At4g24830, At4g26900, At4g30550, At4g33510, At4g35630, At4g39540/F23K16_170, At5g04620, At5g05270, At5g10330, At5g16290, At5g20980, At5g21060, At5g28840, At5g38020, At5g38530, At5g46180, At5g47630, At5g48840, At5g50210, At5g52570, At5g52920, At5g53850, At5g55240, At5g57590, At5g57850, At5g61780, At5g65010, At5g66120, At5g67030, At5g67160, AtATP-PRT1, AtcysD2, BCAT2, BCAT3, BCAT5, BCAT6, BIG, CAC1, CAC2, CAC3, CARB, CER1-like, CHI1, CHI2, CIMS, CM2, CSR 1, CTIMC, CYP20-3, CYP83B1, Cyt ACS 1, DAP, DAPB1, DAPB2, DAPB3, DAPF, DCR, DGL, DHDPS1, DHDPS2, DHS2, EMB1144, F10M2370, F13M2390, F16M2_20, F18K105, F19F1860, F27K19_50, F2A1930, F3O94, F6I180, FAB1, FAD2, FAD6, FAD7, FAD8, FAR3, FLU, FOLB1, GA2, GCN2, GCR1, GLN1-1, GLN1-2, GLN1-3, GLN1-4, GLN1-5, GLT1, GLU1, GLU2, GP ALPHA 1, GS2, HDF7, HDH, HIS6, HMT3, HPA2, IIL1, IMDH1, IMDH2, IMDH3, IMPL2, IMS1, IPMS1, KAS, KAS1, KAT5, KCS1, KCS10, KCS11, KCS13, KCS14, KCS16, KCS18, KCS19, KCS2, KCS20, KCS21, KCS4, KCS5, KCS6, KCS7, KCS9, KIN10, KIN11, KINB1, KINB2, KING1, KO1, L73G190, LACS1, LIP2p, LOX2, LOX3, LOX4, LOX5, LOX6, LYSA1, LYSA2, MEE32, METK3, METK4, MTK, MTN1, MTN2, MTO1, NAGK, NAS1, NAS2, NAS3, NAS4, NFXL1, NIT1, NIT2, NP_001078324, OASA1, OASB, OASC, OMR1, OPR1, OPR3, OTC, P5CSA, P5CSB, PAT, PED1, PMM, POX1, POX2, PROC1, PSP, Q41907, Q42021, Q8LF92, Q9LG24, Q9LQU9, Q9LQY8, Q9SKV1, RML1, RTY/SUR1, S-ACP-DES1, S-ACP-DES2, S-ACP-DES3, S-ACP-DES4, S-ACP-DES5, S-ACP-DES6, SAM1, SAM2, SAT2, SAT4, SMO, SSI2, T13K140, T16L160, T19B17, T1E22_60, T1J1, T22E16, T24P22, T31P16_230, T4D210, T9J141, TAA1, TS1, TS2, TSB1, TYRAAT1, TYRAAT2, UROS, VTC4, WIN1, Z973356, accD, atms2, cer2, cyt1, hsr1, oas5, sld1]"/>
    <att type="string" name="Associated Genes Found0" value="[AT1G02205, AT1G07720, AT1G17745, AT1G51500, AT2G22330, AT3G15850, AT3G25780, AT3G44720, AT3G47340, AT3G59970, AT4G00400, AT4G11280, AT4G16760, AT4G21990, AT4G27070, AT4G39950, AT4G39980, AT5G05730, AT5G10160, AT5G10240, AT5G10480, AT5G20960, AT5G46240, AT5G65010]"/>
    <att type="string" name="GOGroups0" value="[Group2]"/>
    <att type="string" name="GOID0" value="GO:0046394"/>
    <att type="string" name="GOLevels0" value="[5, 6]"/>
    <att type="string" name="GOTerm0" value="carboxylic acid biosynthetic process"/>
    <att type="string" name="Group PValue Corrected with Bonferroni0" value="{Group2=2.667419925045739E-10}"/>
    <att type="string" name="Group PValue0" value="{Group2=1.5690705441445522E-11}"/>
    <att type="integer" name="Nr. Genes0" value="24"/>
    <att type="string" name="Ontology Source0" value="GO_BiologicalProcess_05.05.2011_16h22"/>
    <att type="string" name="OverViewTerm0" value="FALSE"/>
    <att type="real" name="Term PValue Corrected with Bonferroni0" value="3.2778375907244935E-6"/>
    <att type="real" name="Term PValue0" value="2.199891000486237E-8"/>
    <att type="string" name="canonicalName" value="GO:00463940"/>
    <graphics type="ELLIPSE" h="50.000091552734375" w="49.999969482421875" x="317.38478088378906" y="476.20115661621094" fill="#4d1a74" width="1" outline="#000000"/>
  </node>
  <node label="GO:00463510" id="-182">
    <att type="real" name="% Associated Genes0" value="10.0"/>
    <att type="string" name="All Associated Genes0" value="[AT1G06410, AT1G16980, AT1G17000, AT1G23870, AT1G68020, AT1G78580, AT2G24210, AT3G52340, AT4G17770, AT4G27550, AT4g12430, AT4g22590, AT4g39770, AT5G10100, ATTPS11, ATTPS8, At1g35910, At1g43670, At1g78090, At2g22190, At3g55800, At4g39770/T19P19_160, At5g51460, At5g65140, AtTPPA, F16L1, Q9FJQ1, SPP1, SPP3A, SPP3B]"/>
    <att type="string" name="Associated Genes Found0" value="[AT1G23870, AT1G78580, AT4G17770]"/>
    <att type="string" name="GOGroups0" value="[Group11, Group3]"/>
    <att type="string" name="GOID0" value="GO:0046351"/>
    <att type="string" name="GOLevels0" value="[5, 6]"/>
    <att type="string" name="GOTerm0" value="disaccharide biosynthetic process"/>
    <att type="string" name="Group PValue Corrected with Bonferroni0" value="{Group11=1.5686285002411636E-22, Group3=1.4156565253701234E-4}"/>
    <att type="string" name="Group PValue0" value="{Group11=9.227226472006844E-24, Group3=8.327391325706609E-6}"/>
    <att type="integer" name="Nr. Genes0" value="3"/>
    <att type="string" name="Ontology Source0" value="GO_BiologicalProcess_05.05.2011_16h22"/>
    <att type="string" name="OverViewTerm0" value="FALSE"/>
    <att type="real" name="Term PValue Corrected with Bonferroni0" value="1.0"/>
    <att type="real" name="Term PValue0" value="0.007756526910945949"/>
    <att type="string" name="canonicalName" value="GO:00463510"/>
    <graphics type="ELLIPSE" h="30.0" w="30.0" x="573.4140625" y="1395.8037109375" fill="#02068d" width="1" outline="#000000"/>
  </node>
  <node label="GO:00462190" id="-181">
    <att type="real" name="% Associated Genes0" value="11.764705657958984"/>
    <att type="string" name="All Associated Genes0" value="[AT1G29410, AT2G29690, AT4G27070, AT5G05590, AT5G05730, AT5G48150, ATR1, At1g07780, At1g29410, At1g69370/F23O10_5, At2g04400, At3g55870, At5g38530, BIG, CYP83B1, F27K19_50, TSB1]"/>
    <att type="string" name="Associated Genes Found0" value="[AT4G27070, AT5G05730]"/>
    <att type="string" name="GOGroups0" value="[Group11]"/>
    <att type="string" name="GOID0" value="GO:0046219"/>
    <att type="string" name="GOLevels0" value="[6, 7]"/>
    <att type="string" name="GOTerm0" value="indolalkylamine biosynthetic process"/>
    <att type="string" name="Group PValue Corrected with Bonferroni0" value="{Group11=1.5686285002411636E-22}"/>
    <att type="string" name="Group PValue0" value="{Group11=9.227226472006844E-24}"/>
    <att type="integer" name="Nr. Genes0" value="2"/>
    <att type="string" name="Ontology Source0" value="GO_BiologicalProcess_05.05.2011_16h22"/>
    <att type="string" name="OverViewTerm0" value="FALSE"/>
    <att type="real" name="Term PValue Corrected with Bonferroni0" value="1.0"/>
    <att type="real" name="Term PValue0" value="0.022026255937355736"/>
    <att type="string" name="canonicalName" value="GO:00462190"/>
    <graphics type="ELLIPSE" h="30.0" w="30.0" x="462.0" y="1048.0" fill="#02068d" width="1" outline="#000000"/>
  </node>
  <node label="GO:00462180" id="-180">
    <att type="real" name="% Associated Genes0" value="100.0"/>
    <att type="string" name="All Associated Genes0" value="[AT2G22330, AT4G39950]"/>
    <att type="string" name="Associated Genes Found0" value="[AT2G22330, AT4G39950]"/>
    <att type="string" name="GOGroups0" value="[Group11]"/>
    <att type="string" name="GOID0" value="GO:0046218"/>
    <att type="string" name="GOLevels0" value="[5, 6, 7]"/>
    <att type="string" name="GOTerm0" value="indolalkylamine catabolic process"/>
    <att type="string" name="Group PValue Corrected with Bonferroni0" value="{Group11=1.5686285002411636E-22}"/>
    <att type="string" name="Group PValue0" value="{Group11=9.227226472006844E-24}"/>
    <att type="integer" name="Nr. Genes0" value="2"/>
    <att type="string" name="Ontology Source0" value="GO_BiologicalProcess_05.05.2011_16h22"/>
    <att type="string" name="OverViewTerm0" value="FALSE"/>
    <att type="real" name="Term PValue Corrected with Bonferroni0" value="0.027615266722034234"/>
    <att type="real" name="Term PValue0" value="1.8533736055056533E-4"/>
    <att type="string" name="canonicalName" value="GO:00462180"/>
    <graphics type="ELLIPSE" h="50.0" w="50.0" x="880.0" y="1126.0" fill="#02068d" width="1" outline="#000000"/>
  </node>
  <node label="GO:00462170" id="-179">
    <att type="real" name="% Associated Genes0" value="55.55555725097656"/>
    <att type="string" name="All Associated Genes0" value="[AT2G22330, AT2G30770, AT2G38470, AT2G43790, AT3G26830, AT3G45640, AT4G39950, At1g73500/T9L24_8, RML1]"/>
    <att type="string" name="Associated Genes Found0" value="[AT2G22330, AT2G30770, AT3G26830, AT3G45640, AT4G39950]"/>
    <att type="string" name="GOGroups0" value="[Group11]"/>
    <att type="string" name="GOID0" value="GO:0046217"/>
    <att type="string" name="GOLevels0" value="[3, 4, 5]"/>
    <att type="string" name="GOTerm0" value="indole phytoalexin metabolic process"/>
    <att type="string" name="Group PValue Corrected with Bonferroni0" value="{Group11=1.5686285002411636E-22}"/>
    <att type="string" name="Group PValue0" value="{Group11=9.227226472006844E-24}"/>
    <att type="integer" name="Nr. Genes0" value="5"/>
    <att type="string" name="Ontology Source0" value="GO_BiologicalProcess_05.05.2011_16h22"/>
    <att type="string" name="OverViewTerm0" value="FALSE"/>
    <att type="real" name="Term PValue Corrected with Bonferroni0" value="8.134025338267946E-6"/>
    <att type="real" name="Term PValue0" value="5.459077408233521E-8"/>
    <att type="string" name="canonicalName" value="GO:00462170"/>
    <graphics type="ELLIPSE" h="50.0" w="50.0" x="884.583984375" y="942.201171875" fill="#02068d" width="1" outline="#000000"/>
  </node>
  <node label="GO:00461490" id="-178">
    <att type="real" name="% Associated Genes0" value="20.0"/>
    <att type="string" name="All Associated Genes0" value="[AT3G44880, AT4G37000, AT5G13800, CLH1, CLH2, ETFB, F7H1900, NOL, NYC1, PPD]"/>
    <att type="string" name="Associated Genes Found0" value="[AT3G44880, AT5G13800]"/>
    <att type="string" name="GOGroups0" value="[Group11, Group17, Group8]"/>
    <att type="string" name="GOID0" value="GO:0046149"/>
    <att type="string" name="GOLevels0" value="[3]"/>
    <att type="string" name="GOTerm0" value="pigment catabolic process"/>
    <att type="string" name="Group PValue Corrected with Bonferroni0" value="{Group11=1.5686285002411636E-22, Group17=0.0032000058459379366, Group8=1.9149650656212817E-4}"/>
    <att type="string" name="Group PValue0" value="{Group11=9.227226472006844E-24, Group17=1.8823563799634922E-4, Group8=1.126450038600754E-5}"/>
    <att type="integer" name="Nr. Genes0" value="2"/>
    <att type="string" name="Ontology Source0" value="GO_BiologicalProcess_05.05.2011_16h22"/>
    <att type="string" name="OverViewTerm0" value="FALSE"/>
    <att type="real" name="Term PValue Corrected with Bonferroni0" value="1.0"/>
    <att type="real" name="Term PValue0" value="0.007759255761273985"/>
    <att type="string" name="canonicalName" value="GO:00461490"/>
    <graphics type="ELLIPSE" h="30.0" w="30.0" x="1289.0" y="1097.0" fill="#02068d" width="1" outline="#000000"/>
  </node>
  <node label="GO:00459350" id="-177">
    <att type="real" name="% Associated Genes0" value="4.651162624359131"/>
    <att type="string" name="All Associated Genes0" value="[AT1G21600, AT1G28300, AT1G45249, AT1G62180, AT1G69120, AT2G20570, AT2G23430, AT2G36270, AT2G36490, AT2G42680, AT3G01470, AT3G11440, AT3G24140, AT3G24500, AT3G26744, AT3G58680, AT3G60390, AT3G61890, AT4G40060, AT5G06100, AT5G08565, AT5G22220, AT5G22260, AT5G44190, AT5G47220, AT5G65310, ATHB-51, ATHB-6, ATHSFA2, At1g25540, At1g61040, At1g71930, At1g73500/T9L24_8, At2g02540, At2g32460, At2g34210, At2g34640, At2g35530, At3g09210, At3g10800, At4g08350, At5g08565, At5g62380, At5g63670, BHLH54, BRN1, BRN2, CPL2, DOF3, DOF5, DPBF2, E2FA, ELF8, ERABP1, F18K100, F24M1200, F27K19_170, FZR1, GATA12, GATA2, GATA3, GATA4, GATA5, GATA6, GATA7, GATA8, GATA9, GCN5, INO80, NAC012, NAC043, NAC066, NAC078, NAC69, NFYB6, NFYB9, NFYC1, NFYC2, NPR6, NP_182035, PTAC2, RAP1, SCL14, WRKY53, ZAP1, sig]"/>
    <att type="string" name="Associated Genes Found0" value="[AT2G42680, AT3G60390, AT3G61890, AT5G44190]"/>
    <att type="string" name="GOGroups0" value="[Group6]"/>
    <att type="string" name="GOID0" value="GO:0045935"/>
    <att type="string" name="GOLevels0" value="[6]"/>
    <att type="string" name="GOTerm0" value="positive regulation of nucleobase, nucleoside, nucleotide and nucleic acid metabolic process"/>
    <att type="string" name="Group PValue Corrected with Bonferroni0" value="{Group6=0.005947125430452599}"/>
    <att type="string" name="Group PValue0" value="{Group6=3.498309076736823E-4}"/>
    <att type="integer" name="Nr. Genes0" value="4"/>
    <att type="string" name="Ontology Source0" value="GO_BiologicalProcess_05.05.2011_16h22"/>
    <att type="string" name="OverViewTerm0" value="FALSE"/>
    <att type="real" name="Term PValue Corrected with Bonferroni0" value="1.0"/>
    <att type="real" name="Term PValue0" value="0.030078955862437855"/>
    <att type="string" name="canonicalName" value="GO:00459350"/>
    <graphics type="ELLIPSE" h="30.00006103515625" w="30.000244140625" x="1690.7196044921875" y="879.6632995605469" fill="#6eee80" width="1" outline="#000000"/>
  </node>
  <node label="GO:00459340" id="-176">
    <att type="real" name="% Associated Genes0" value="4.054054260253906"/>
    <att type="string" name="All Associated Genes0" value="[AHL21, AT1G02450, AT1G02580, AT1G02970, AT1G20330, AT1G24190, AT1G54160, AT1G59750, AT1G63020, AT2G22540, AT2G27040, AT2G32940, AT2G36490, AT2G39810, AT2G43410, AT3G01320, AT3G48160, AT4G03190, AT4G05420, AT4G15900, AT4G16280, AT4G16780, AT4G32551, AT4G38130, AT4G38620, AT5G02030, AT5G08550, AT5G13060, AT5G13240, AT5G15380, AT5G17690, AT5G54500, AT5G62000, At1g14410, At1g74660, At2g30280, At2g32700, At2g47210, At3g02820/F13E7_24, At4g28110, At4g37460/F6G17_110, At5g09230, At5g40530, At5g55760, CHR1, CMT3, CPL1, DOF5, F13E74, GRXC7, GRXC8, GTL1, HAG2, HD2B, MEE58, MOM1, MSH2, NFYA4, NFYA7, NFYA9, OSB1, PKL, RING1A, RING1B, SAL1, SAS1, SKP1, SUVH5, T27I15_140, T5E8_30, T8P1980, WRKY27, WRKY42, WRKY6]"/>
    <att type="string" name="Associated Genes Found0" value="[AT1G02450, AT2G27040, AT5G54500]"/>
    <att type="string" name="GOGroups0" value="[Group10, Group17, Group5]"/>
    <att type="string" name="GOID0" value="GO:0045934"/>
    <att type="string" name="GOLevels0" value="[6]"/>
    <att type="string" name="GOTerm0" value="negative regulation of nucleobase, nucleoside, nucleotide and nucleic acid metabolic process"/>
    <att type="string" name="Group PValue Corrected with Bonferroni0" value="{Group10=0.006736712397954536, Group17=0.0032000058459379366, Group5=2.6136523534972203E-9}"/>
    <att type="string" name="Group PValue0" value="{Group10=3.962771998796786E-4, Group17=1.8823563799634922E-4, Group5=1.5374425608807179E-10}"/>
    <att type="integer" name="Nr. Genes0" value="3"/>
    <att type="string" name="Ontology Source0" value="GO_BiologicalProcess_05.05.2011_16h22"/>
    <att type="string" name="OverViewTerm0" value="FALSE"/>
    <att type="real" name="Term PValue Corrected with Bonferroni0" value="1.0"/>
    <att type="real" name="Term PValue0" value="0.08039608396909391"/>
    <att type="string" name="canonicalName" value="GO:00459340"/>
    <graphics type="ELLIPSE" h="30.0" w="30.0" x="1203.0" y="482.0" fill="#8be2c9" width="1" outline="#000000"/>
  </node>
  <node label="GO:00458930" id="-175">
    <att type="real" name="% Associated Genes0" value="5.128205299377441"/>
    <att type="string" name="All Associated Genes0" value="[AT1G21600, AT1G28300, AT1G45249, AT1G62180, AT1G69120, AT2G20570, AT2G36270, AT2G36490, AT2G42680, AT3G01470, AT3G11440, AT3G24140, AT3G24500, AT3G26744, AT3G58680, AT3G60390, AT3G61890, AT4G40060, AT5G06100, AT5G08565, AT5G22220, AT5G22260, AT5G44190, AT5G47220, AT5G65310, ATHB-51, ATHB-6, ATHSFA2, At1g25540, At1g61040, At1g71930, At1g73500/T9L24_8, At2g02540, At2g32460, At2g34640, At2g35530, At3g10800, At5g08565, At5g62380, At5g63670, BHLH54, BRN1, BRN2, CPL2, DOF3, DOF5, DPBF2, E2FA, ELF8, F24M1200, F27K19_170, GATA12, GATA2, GATA3, GATA4, GATA5, GATA6, GATA7, GATA8, GATA9, GCN5, NAC012, NAC043, NAC066, NAC078, NAC69, NFYB6, NFYB9, NFYC1, NFYC2, NPR6, NP_182035, PTAC2, RAP1, SCL14, WRKY53, ZAP1, sig]"/>
    <att type="string" name="Associated Genes Found0" value="[AT2G42680, AT3G60390, AT3G61890, AT5G44190]"/>
    <att type="string" name="GOGroups0" value="[Group6]"/>
    <att type="string" name="GOID0" value="GO:0045893"/>
    <att type="string" name="GOLevels0" value="[7, 8]"/>
    <att type="string" name="GOTerm0" value="positive regulation of transcription, DNA-dependent"/>
    <att type="string" name="Group PValue Corrected with Bonferroni0" value="{Group6=0.005947125430452599}"/>
    <att type="string" name="Group PValue0" value="{Group6=3.498309076736823E-4}"/>
    <att type="integer" name="Nr. Genes0" value="4"/>
    <att type="string" name="Ontology Source0" value="GO_BiologicalProcess_05.05.2011_16h22"/>
    <att type="string" name="OverViewTerm0" value="FALSE"/>
    <att type="real" name="Term PValue Corrected with Bonferroni0" value="1.0"/>
    <att type="real" name="Term PValue0" value="0.02195941625888968"/>
    <att type="string" name="canonicalName" value="GO:00458930"/>
    <graphics type="ELLIPSE" h="30.0001220703125" w="30.0" x="1566.7196044921875" y="731.6632690429688" fill="#6eee80" width="1" outline="#000000"/>
  </node>
  <node label="GO:00458920" id="-174">
    <att type="real" name="% Associated Genes0" value="4.6875"/>
    <att type="string" name="All Associated Genes0" value="[AHL21, AT1G02450, AT1G02580, AT1G24190, AT1G54160, AT1G59750, AT1G63020, AT2G22540, AT2G27040, AT2G32940, AT2G36490, AT2G39810, AT2G43410, AT3G01320, AT4G03190, AT4G05420, AT4G15900, AT4G16280, AT4G16780, AT4G32551, AT4G38130, AT4G38620, AT5G02030, AT5G08550, AT5G13240, AT5G15380, AT5G17690, AT5G54500, AT5G62000, At1g74660, At2g30280, At2g32700, At2g47210, At4g28110, At4g37460/F6G17_110, At5g09230, At5g40530, At5g55760, CHR1, CMT3, CPL1, DOF5, GRXC7, GRXC8, GTL1, HAG2, HD2B, MEE58, MOM1, NFYA4, NFYA7, NFYA9, PKL, RING1A, RING1B, SAL1, SAS1, SUVH5, T27I15_140, T5E8_30, T8P1980, WRKY27, WRKY42, WRKY6]"/>
    <att type="string" name="Associated Genes Found0" value="[AT1G02450, AT2G27040, AT5G54500]"/>
    <att type="string" name="GOGroups0" value="[Group10, Group17, Group5]"/>
    <att type="string" name="GOID0" value="GO:0045892"/>
    <att type="string" name="GOLevels0" value="[7, 8]"/>
    <att type="string" name="GOTerm0" value="negative regulation of transcription, DNA-dependent"/>
    <att type="string" name="Group PValue Corrected with Bonferroni0" value="{Group10=0.006736712397954536, Group17=0.0032000058459379366, Group5=2.6136523534972203E-9}"/>
    <att type="string" name="Group PValue0" value="{Group10=3.962771998796786E-4, Group17=1.8823563799634922E-4, Group5=1.5374425608807179E-10}"/>
    <att type="integer" name="Nr. Genes0" value="3"/>
    <att type="string" name="Ontology Source0" value="GO_BiologicalProcess_05.05.2011_16h22"/>
    <att type="string" name="OverViewTerm0" value="FALSE"/>
    <att type="real" name="Term PValue Corrected with Bonferroni0" value="1.0"/>
    <att type="real" name="Term PValue0" value="0.05693269228795988"/>
    <att type="string" name="canonicalName" value="GO:00458920"/>
    <graphics type="ELLIPSE" h="30.0" w="30.0" x="1171.0" y="484.0" fill="#8be2c9" width="1" outline="#000000"/>
  </node>
  <node label="GO:00450880" id="-173">
    <att type="real" name="% Associated Genes0" value="8.69565200805664"/>
    <att type="string" name="All Associated Genes0" value="[ASHH2, AT1G02450, AT1G33520, AT1G80680, AT2G22330, AT2G43790, AT3G15210, AT3G18690, AT3G26830, AT4G11260, AT4G12720, AT4G15900, AT4G18470, AT4G25230, AT4G37000, AT4g22300, AT5G13220, AT5G40990, AT5G47220, AT5G51450, AT5G59890, AT5G60410, ATMKK3, At1g71220, At3g05360, At5g22330, CALS12, CRT3, EFR, F14G92, F24J70, FMO1, GH32, ILL5, ILL6, JAR1, MOS4, PBA1, RIN4, RPS4, SAS1, SGT1A, SYP121, SYP122, WRKY70, erd2]"/>
    <att type="string" name="Associated Genes Found0" value="[AT1G02450, AT2G22330, AT3G26830, AT5G13220]"/>
    <att type="string" name="GOGroups0" value="[Group11]"/>
    <att type="string" name="GOID0" value="GO:0045088"/>
    <att type="string" name="GOLevels0" value="[5, 6]"/>
    <att type="string" name="GOTerm0" value="regulation of innate immune response"/>
    <att type="string" name="Group PValue Corrected with Bonferroni0" value="{Group11=1.5686285002411636E-22}"/>
    <att type="string" name="Group PValue0" value="{Group11=9.227226472006844E-24}"/>
    <att type="integer" name="Nr. Genes0" value="4"/>
    <att type="string" name="Ontology Source0" value="GO_BiologicalProcess_05.05.2011_16h22"/>
    <att type="string" name="OverViewTerm0" value="FALSE"/>
    <att type="real" name="Term PValue Corrected with Bonferroni0" value="0.5240630768080357"/>
    <att type="real" name="Term PValue0" value="0.0035172018577720515"/>
    <att type="string" name="canonicalName" value="GO:00450880"/>
    <graphics type="ELLIPSE" h="30.0" w="30.0" x="917.0" y="905.0" fill="#02068d" width="1" outline="#000000"/>
  </node>
  <node label="GO:00442820" id="-172">
    <att type="real" name="% Associated Genes0" value="4.6218485832214355"/>
    <att type="string" name="All Associated Genes0" value="[ACG12, ACG9, ALAAT1, AT1G03000, AT1G06290, AT1G06570, AT1G14520, AT1G18270, AT1G79440, AT1G79810, AT1G80460, AT2G16500, AT2G18960, AT2G19800, AT2G19860, AT2G21330, AT2G22330, AT2G22480, AT2G26350, AT2G43130, AT3G07560, AT3G10370, AT3G47340, AT3G51840, AT3G52990, AT3G54840, AT3G63410, AT3g04520/T27C4_17, AT4G16760, AT4G26260, AT4G26270, AT4G29220, AT4G32840, AT4G33650, AT4G34710, AT4G35020, AT4G39660, AT4G39950, AT4g39520, AT5G03690, AT5G04230, AT5G13420, AT5G13790, AT5G25760, AT5G37830, AT5G42080, AT5G47810, AT5G54080, AT5G56630, AT5G56640, AT5G61580, AT5G62530, AT5G64813, AT5G65110, ATK3, ATK4, ATNADP-ME2, ATNAP11, At1g01090, At1g02400, At1g08630, At1g13440, At1g13700, At1g14520, At1g17470, At1g17650, At1g18270, At1g20950/F9H16, At1g22170, At1g24280, At1g32440, At1g32470, At1g47840, At1g47990, At1g50460, At1g52980, At1g54220, At1g56190, At1g59900, At1g60990, At1g64190, At1g64660/F1N193, At1g65520, At1g71100, At1g71170, At1g71180, At1g75980, At1g76550, At1g78050/F28K19_30, At1g79550/T8K14, At2g01290, At2g19860, At2g21330, At2g30650, At2g30660, At2g35120, At2g36460, At2g36580, At2g40690, At2g43400, At3g01420/T13O15, At3g02360, At3g04050, At3g05290, At3g08590, At3g13930, At3g20040, At3g21780, At3g22200, At3g22960, At3g25530, At3g25960, At3g49160, At3g49360, At3g52990, At3g55410, At3g63150, At4g12130, At4g20930, At4g24620, At4g26390, At4g26520, At4g29210, At4g33010, At4g37840, At4g39640, At4g39650, At5g03690, At5g08570, At5g13110, At5g18570, At5g18860, At5g24410, At5g24420, At5g27520, At5g36160, At5g41670, At5g42890, At5g43280, At5g44520, At5g45930, At5g46180, At5g52920, At5g56350/MCD7, At5g63680, At5g63910, At5g64813, BCAT1, CHLI, CHR1, CHY1, CTIMC, CYP707A3, DHAPRD, ECH2, EMB2024, ENO1, ENO2, ENO3, ETFB, F12F13, F19B1550, F1I16_220, F1I16_60, F28J1220, F28J1230, F6H1130, F8J2_100, FBA1, FBA2, FBA3, FTSZ1, FTSZ2-1, FTSZ2-2, FUT11, GAPC, GDCSH, GDCST, GP ALPHA 1, HMA1, HSP90-2, HXK1, IAR4, LDH1, LTA3, M3E90, MCCA, MCCB, MFP2, MIND1, MLP34, NOA1, NUDT25, PAL1, PAL2, PAL3, PAL4, PDH2, PED1, PEX1, PEX12, PGIC, PGK1, PGM, PHYLLO, POX1, POX2, PYD1A, PYD2, PYD3, Q42207, Q94A74, Q9LM23, Q9LNP0, Q9LPP9, Q9LQR9, Q9ZRQ2, RABA1A, RH14, RH39, SDH, T24H245, T9E80, T9J146, TIM, TOC159, TOC33, TOC34, URH1, URH2, VAR1, XDH1, XYLA, ZWI, cda1, dl3255c, dl3260c, gpdhc]"/>
    <att type="string" name="Associated Genes Found0" value="[AT2G19860, AT2G21330, AT2G22330, AT3G47340, AT3G51840, AT4G16760, AT4G39950, AT5G13420, AT5G54080, AT5G56630, AT5G65110]"/>
    <att type="string" name="GOGroups0" value="[Group11, Group2, Group3]"/>
    <att type="string" name="GOID0" value="GO:0044282"/>
    <att type="string" name="GOLevels0" value="[3]"/>
    <att type="string" name="GOTerm0" value="small molecule catabolic process"/>
    <att type="string" name="Group PValue Corrected with Bonferroni0" value="{Group11=1.5686285002411636E-22, Group2=2.667419925045739E-10, Group3=1.4156565253701234E-4}"/>
    <att type="string" name="Group PValue0" value="{Group11=9.227226472006844E-24, Group2=1.5690705441445522E-11, Group3=8.327391325706609E-6}"/>
    <att type="integer" name="Nr. Genes0" value="11"/>
    <att type="string" name="Ontology Source0" value="GO_BiologicalProcess_05.05.2011_16h22"/>
    <att type="string" name="OverViewTerm0" value="FALSE"/>
    <att type="real" name="Term PValue Corrected with Bonferroni0" value="0.06571281829266909"/>
    <att type="real" name="Term PValue0" value="4.410256261252959E-4"/>
    <att type="string" name="canonicalName" value="GO:00442820"/>
    <graphics type="ELLIPSE" h="49.9998779296875" w="50.0" x="545.0" y="876.0" fill="#02068d" width="1" outline="#000000"/>
  </node>
  <node label="GO:00442720" id="-171">
    <att type="real" name="% Associated Genes0" value="8.181818008422852"/>
    <att type="string" name="All Associated Genes0" value="[AKHSDH1, AKHSDH2, ARD1, ARD2, ARD3, AT1G04640, AT1G16400, AT1G16410, AT1G18570, AT1G24100, AT1G55920, AT1G62180, AT2G14750, AT2G22330, AT2G30770, AT2G38470, AT2G43360, AT2G43790, AT3G09710, AT3G19710, AT3G25900, AT3G26830, AT3G45640, AT3G59970, AT3G63250, AT4G04610, AT4G13770, AT4G14720, AT4G21990, AT4G39940, AT4G39950, AT5G05260, AT5G23020, AT5G27380, AT5G43850, AT5G64813, ATR1, ATSERAT1, ATSERAT2, At1g02880, At1g03160, At1g14810, At1g47578, At1g65880, At1g73500/T9L24_8, At2g05830, At2g17265, At2g29630, At2g44750/F16B224, At3g03630, At3g21500, At3g22460, At3g24030, At3g57050, At4g14710, At4g30550, At5g04620, At5g20980, At5g21060, At5g53850, At5g57590, AtcysD2, CIMS, CLA1, CYP20-3, CYP83B1, Cyt ACS 1, F10O3, F19G100, F6I180, FMOGS-OX1, FMOGS-OX2, FMOGS-OX3, FMOGS-OX4, FMOGS-OX5, FZL, GSL-OH, HMT3, IIL1, IMDH3, LIP2p, MAM1, METK3, METK4, MTK, MTN1, MTN2, MTO1, NP_001078324, OASA1, OASB, OASC, Q8LF92, Q9LG24, Q9LVF5, RML1, RTY/SUR1, SAM1, SAM2, SAT2, SAT4, SOT16, SOT17, SOT18, T4I9, T9J141, THI1, atms2, cyp81F2, oas5]"/>
    <att type="string" name="Associated Genes Found0" value="[AT1G16410, AT1G18570, AT2G22330, AT2G30770, AT3G26830, AT3G45640, AT3G59970, AT4G21990, AT4G39950]"/>
    <att type="string" name="GOGroups0" value="[Group0, Group11]"/>
    <att type="string" name="GOID0" value="GO:0044272"/>
    <att type="string" name="GOLevels0" value="[4]"/>
    <att type="string" name="GOTerm0" value="sulfur compound biosynthetic process"/>
    <att type="string" name="Group PValue Corrected with Bonferroni0" value="{Group0=1.3381211412481791E-5, Group11=1.5686285002411636E-22}"/>
    <att type="string" name="Group PValue0" value="{Group0=7.871300830871642E-7, Group11=9.227226472006844E-24}"/>
    <att type="integer" name="Nr. Genes0" value="9"/>
    <att type="string" name="Ontology Source0" value="GO_BiologicalProcess_05.05.2011_16h22"/>
    <att type="string" name="OverViewTerm0" value="TRUE"/>
    <att type="real" name="Term PValue Corrected with Bonferroni0" value="0.0029411009946432778"/>
    <att type="real" name="Term PValue0" value="1.9738932849954885E-5"/>
    <att type="string" name="canonicalName" value="GO:00442720"/>
    <graphics type="ELLIPSE" h="50.0" w="50.0" x="1036.3720703125" y="1312.0458984375" fill="#789f62" width="1" outline="#000000"/>
  </node>
  <node label="GO:00442700" id="-170">
    <att type="real" name="% Associated Genes0" value="6.849315166473389"/>
    <att type="string" name="All Associated Genes0" value="[AAH, ABCG36, AT2G18960, AT2G22330, AT2G26550, AT2G43130, AT3G44880, AT3G54840, AT4G33650, AT4G35020, AT4G37000, AT4G39950, AT4g04955, AT4g39520, AT5G13800, AT5G42080, AT5G44070, ATK3, ATK4, ATNAP11, At1g17470, At1g52980, At1g58300, At1g69720, At2g26670, At2g35820, At3g63150, At5g18570, At5g18860, At5g43600, At5g45930, At5g64813, BGLU26, CHLI, CHR1, CLH1, CLH2, ETFB, F7H1900, FTSZ1, FTSZ2-1, FTSZ2-2, GP ALPHA 1, HMA1, HO3, HSP90-2, MIND1, NOA1, NOL, NP_180223, NUDT25, NYC1, PHO2, PPD, PYD1A, PYD2, PYD3, RABA1A, RH14, RH39, T9E80, TED4, TOC159, TOC33, TOC34, URH1, URH2, VAR1, XDH1, ZWI, cda1, oas5, ylbA]"/>
    <att type="string" name="Associated Genes Found0" value="[AT2G22330, AT3G44880, AT4G39950, AT5G13800, AT5G44070]"/>
    <att type="string" name="GOGroups0" value="[Group11, Group8]"/>
    <att type="string" name="GOID0" value="GO:0044270"/>
    <att type="string" name="GOLevels0" value="[4]"/>
    <att type="string" name="GOTerm0" value="cellular nitrogen compound catabolic process"/>
    <att type="string" name="Group PValue Corrected with Bonferroni0" value="{Group11=1.5686285002411636E-22, Group8=1.9149650656212817E-4}"/>
    <att type="string" name="Group PValue0" value="{Group11=9.227226472006844E-24, Group8=1.126450038600754E-5}"/>
    <att type="integer" name="Nr. Genes0" value="5"/>
    <att type="string" name="Ontology Source0" value="GO_BiologicalProcess_05.05.2011_16h22"/>
    <att type="string" name="OverViewTerm0" value="FALSE"/>
    <att type="real" name="Term PValue Corrected with Bonferroni0" value="0.47722160578507067"/>
    <att type="real" name="Term PValue0" value="0.00320282956902732"/>
    <att type="string" name="canonicalName" value="GO:00442700"/>
    <graphics type="ELLIPSE" h="30.0" w="30.0" x="1055.9970703125" y="1093.9697265625" fill="#02068d" width="1" outline="#000000"/>
  </node>
  <node label="GO:00442480" id="-169">
    <att type="real" name="% Associated Genes0" value="4.395604610443115"/>
    <att type="string" name="All Associated Genes0" value="[103-1A, A0ME23, A1A6G4, AAH, ABCG36, ACO3, ALAAT1, AMSH3, APXS, APXT, AT1G03000, AT1G06290, AT1G06570, AT1G07890, AT1G10230, AT1G10360, AT1G13060, AT1G14400, AT1G16890, AT1G17110, AT1G17280, AT1G20140, AT1G26830, AT1G27140, AT1G28200, AT1G30950, AT1G32850, AT1G45050, AT1G51710, AT1G54490, AT1G62040, AT1G62380, AT1G63800, AT1G69670, AT1G75660, AT1G77000, AT1G77440, AT1G78870, AT1G79440, AT1G79650, AT1G79810, AT2G02390, AT2G02760, AT2G03160, AT2G03170, AT2G03190, AT2G04660, AT2G05630, AT2G16500, AT2G16740, AT2G17130, AT2G18450, AT2G18960, AT2G19590, AT2G20160, AT2G21270, AT2G22310, AT2G22330, AT2G24640, AT2G25490, AT2G25700, AT2G26350, AT2G26550, AT2G29420, AT2G29440, AT2G29460, AT2G29470, AT2G29480, AT2G29490, AT2G38080, AT2G39940, AT2G40930, AT2G43130, AT2G43430, AT2G44990, AT2G45170, AT2G45950, AT2G46030, AT3G02540, AT3G05530, AT3G06420, AT3G07560, AT3G08690, AT3G09640, AT3G11910, AT3G13170, AT3G15580, AT3G17000, AT3G20060, AT3G20630, AT3G21830, AT3G21840, AT3G21850, AT3G21860, AT3G25530, AT3G25650, AT3G27380, AT3G27430, AT3G44880, AT3G46460, AT3G47340, AT3G50100, AT3G51770, AT3G51840, AT3G53060, AT3G54840, AT3G55380, AT3G58740, AT3G58750, AT3G60010, AT3G60020, AT3G60100, AT3G60640, AT3G61415, AT3g04520/T27C4_17, AT4G02570, AT4G03510, AT4G04620, AT4G10570, AT4G10590, AT4G11260, AT4G14800, AT4G15165, AT4G16520, AT4G16760, AT4G21980, AT4G22350, AT4G32320, AT4G32810, AT4G33650, AT4G34210, AT4G34470, AT4G34710, AT4G35000, AT4G35020, AT4G35260, AT4G35970, AT4G37000, AT4G39370, AT4G39660, AT4G39910, AT4G39950, AT4g04955, AT4g22290, AT4g22350, AT4g22410, AT4g39520, AT5G01050, AT5G04040, AT5G04230, AT5G05080, AT5G13790, AT5G13800, AT5G15250, AT5G16260, AT5G17220, AT5G17290, AT5G25350, AT5G25760, AT5G37830, AT5G40580, AT5G40650, AT5G41340, AT5G41700, AT5G42080, AT5G42190, AT5G42540, AT5G44070, AT5G45900, AT5G46210, AT5G50870, AT5G53300, AT5G54080, AT5G56150, AT5G56280, AT5G57360, AT5G59300, AT5G62480, AT5G62530, AT5G62540, AT5G64813, AT5G65110, AT5G65165, ATCS, ATE1, ATG12A, ATG12B, ATG3, ATG4A, ATG4B, ATGSTF10, ATGSTF3, ATGSTF6, ATGSTF8, ATGSTU13, ATK3, ATK4, ATNAP11, At HRD1, At HRD3, At1g02145, At1g02400, At1g02940, At1g02950, At1g04410, At1g08370, At1g08630, At1g11190, At1g17170, At1g17180/F20D23_12, At1g17470, At1g26110, At1g27980, At1g32470, At1g33700, At1g33980, At1g43140, At1g47990, At1g49860, At1g51710, At1g52430, At1g52450, At1g52980, At1g53240, At1g53680, At1g53790, At1g54210, At1g58300, At1g59670, At1g59700, At1g59790, At1g59800, At1g60990, At1g64660/F1N193, At1g65130, At1g65140, At1g65160, At1g65170, At1g65200, At1g65520, At1g65650/F5I148, At1g65930, At1g66610, At1g66620, At1g66630, At1g66650, At1g66660, At1g68290, At1g69720, At1g69920, At1g69930/T17F3_4, At1g74590/F1M20_27, At1g75980, At1g78320, At1g78340/F3F9_13, At2g02380, At2g18290, At2g20420, At2g21270, At2g22780, At2g24640, At2g26670, At2g27620, At2g27650, At2g29070, At2g30650, At2g30660, At2g30860, At2g31690, At2g35120, At2g35820, At2g43400, At2g47220, At3g01420/T13O15, At3g03190, At3g03530, At3g05290, At3g09270, At3g11240, At3g13300, At3g13672, At3g15020, At3g16090/MSL1_13, At3g21780, At3g22200, At3g24180, At3g27820, At3g46910, At3g47520, At3g51260, At3g52880, At3g61710, At3g62770, At3g63150, At4g01070, At4g10060, At4g12100, At4g12130, At4g17510/dl4790c, At4g21590, At4g21600, At4g22290, At4g22350, At4g26910, At4g29210, At4g33010, At4g38930, At4g39640, At4g39650, At5g08300, At5g09660, At5g13570/MSH12_3, At5g14590, At5g16310/MQK4_3, At5g18570, At5g18860, At5g23250, At5g27520, At5g28540, At5g36160, At5g37870, At5g37890, At5g37900, At5g37910, At5g37930, At5g38470, At5g41220, At5g41240, At5g42890, At5g43280, At5g43330, At5g43600, At5g45930, At5g46180, At5g48990, At5g49900, At5g50950, At5g51530, At5g55070, At5g56720, At5g58330, At5g59140, At5g61940, At5g61950, At5g62800, At5g63910, At5g64813, AtAPG9, B0FZE0, BCAT1, BGLU26, CAF1-11, CAF1-9, CAT1, CAT2, CCD1, CHLI, CHR1, CHY1, CLH1, CLH2, CSY3, CUL2, CYP707A3, DLD, ECH2, ESM1, ESP, ETFB, F14M26, F18E510, F18E520, F19H220, F26K9_190, F28J1220, F28J1230, F7H1900, F8F6_70, FBL17, FTSH1, FTSH11, FTSH8, FTSZ1, FTSZ2-1, FTSZ2-2, FUM1, FUM2, GDCSH, GDCST, GP ALPHA 1, GST30, GSTF7, HMA1, HO3, HOL1, HSP90-2, ICDH, ICL, IDH3, IDH5, IDH6, LAC1, LAC10, LAC11, LAC12, LAC13, LAC14, LAC16, LAC17, LAC2, LAC3, LAC5, LAC6, LAC7, LAC8, LBA1, MCCA, MCCB, MFP2, MIND1, NIT3, NOA1, NOL, NP_180223, NSP1, NSP2, NSP3, NSP4, NSP5, NTRC, NUDT25, NYC1, PAA1, PAA2, PAB1, PAB2, PAC1, PAD1, PAE1, PAE2, PAF1, PAF2, PAG1, PAL1, PAL2, PAL3, PAL4, PAP26, PBA1, PBC1, PBD1, PBD2, PBE1, PBE2, PBF1, PBG1, PED1, PER10, PER11, PER12, PER13, PER14, PER15, PER16, PER17, PER18, PER19, PER2, PER20, PER21, PER22, PER23, PER24, PER25, PER27, PER28, PER29, PER3, PER30, PER31, PER32, PER33, PER34, PER35, PER36, PER37, PER38, PER39, PER4, PER40, PER41, PER42, PER43, PER44, PER45, PER46, PER48, PER49, PER50, PER51, PER52, PER53, PER54, PER55, PER56, PER57, PER59, PER6, PER60, PER61, PER62, PER63, PER64, PER65, PER66, PER67, PER68, PER69, PER7, PER70, PER71, PER72, PER73, PER8, PER9, PEX1, PEX12, PHO2, PHYLLO, PLDEPSILON, PLDP2, PLDZETA, PM24, POX1, POX2, PPC1, PPC2, PPC3, PPC4, PPD, PUB1, PYD1A, PYD2, PYD3, Pnp, Q42353, Q43285, Q8H1U3, Q9LID2, Q9LQR9, Q9LTY0, Q9SHY9, RABA1A, RAD23-1, RAD23-2, RAD23-3, RAD23-4, RH14, RH20, RH30, RH39, RH40, RHF1A, RML1, RNS2, RPN10, RPN12A, RPT2A, RPT5B, SAL1, SDH, SDH1-1, SDH2-1, SINAT1, SINAT2, SINAT3, SINAT4, SINAT5, SKP1, SKP2A, T10C2140, T12J13, T17F1540, T1E22_60, T21H19_10, T21P5, T23J710, T23K8, T28A8_90, T5L1990, T9E80, TED4, TGG1, TGG2, TIP3-1, TOC159, TOC33, TOC34, TT10, UBC28, UBC9, UBP1, UBP12, UBP13, UBP16, UBP17, UBP18, UBP19, UBP2, UBP20, UBP21, UBP22, UBP23, UBP24, UBP25, UBP26, UBP27, UBP7, UBP8, URH1, URH2, VAR1, VAR2, XDH1, ZWI, cda1, dl3255c, dl3260c, dl3625w, dl3755w, dl4790c, gst, gst10, gst8, oas5, sdh4, ylbA]"/>
    <att type="string" name="Associated Genes Found0" value="[AT1G10360, AT1G62380, AT2G02390, AT2G22330, AT2G25490, AT2G29420, AT2G29460, AT2G45170, AT3G06420, AT3G08690, AT3G11910, AT3G17000, AT3G44880, AT3G47340, AT3G51840, AT3G60640, AT4G04620, AT4G10590, AT4G16760, AT4G39950, AT5G13800, AT5G17220, AT5G44070, AT5G45900, AT5G53300, AT5G54080, AT5G56150, AT5G65110]"/>
    <att type="string" name="GOGroups0" value="[Group11]"/>
    <att type="string" name="GOID0" value="GO:0044248"/>
    <att type="string" name="GOLevels0" value="[3]"/>
    <att type="string" name="GOTerm0" value="cellular catabolic process"/>
    <att type="string" name="Group PValue Corrected with Bonferroni0" value="{Group11=1.5686285002411636E-22}"/>
    <att type="string" name="Group PValue0" value="{Group11=9.227226472006844E-24}"/>
    <att type="integer" name="Nr. Genes0" value="28"/>
    <att type="string" name="Ontology Source0" value="GO_BiologicalProcess_05.05.2011_16h22"/>
    <att type="string" name="OverViewTerm0" value="FALSE"/>
    <att type="real" name="Term PValue Corrected with Bonferroni0" value="7.4935718599840865E-6"/>
    <att type="real" name="Term PValue0" value="5.029242859049722E-8"/>
    <att type="string" name="canonicalName" value="GO:00442480"/>
    <graphics type="ELLIPSE" h="50.0" w="50.0" x="628.1884155273438" y="906.4307250976562" fill="#02068d" width="1" outline="#000000"/>
  </node>
  <node label="GO:00442420" id="-168">
    <att type="real" name="% Associated Genes0" value="6.666666507720947"/>
    <att type="string" name="All Associated Genes0" value="[AT1G03000, AT1G06290, AT1G79810, AT2G26350, AT2G44990, AT3G07560, AT3G51840, AT4G16760, AT4G32810, AT5G04040, AT5G13790, AT5G25760, AT5G65110, At1g02400, At1g27980, At1g33700, At1g47990, At1g65520, At2g31690, At3g01420/T13O15, At3g03530, At3g05290, At3g21780, At3g24180, At4g10060, At5g27520, At5g42890, At5g43280, At5g49900, CCD1, CYP707A3, ECH2, F14M26, MFP2, PED1, PEX1, PEX12, PLDEPSILON, PLDP2, PLDZETA, Q9LTY0, T21P5, T5L1990, dl3255c, dl3260c]"/>
    <att type="string" name="Associated Genes Found0" value="[AT3G51840, AT4G16760, AT5G65110]"/>
    <att type="string" name="GOGroups0" value="[Group11, Group2]"/>
    <att type="string" name="GOID0" value="GO:0044242"/>
    <att type="string" name="GOLevels0" value="[4, 5]"/>
    <att type="string" name="GOTerm0" value="cellular lipid catabolic process"/>
    <att type="string" name="Group PValue Corrected with Bonferroni0" value="{Group11=1.5686285002411636E-22, Group2=2.667419925045739E-10}"/>
    <att type="string" name="Group PValue0" value="{Group11=9.227226472006844E-24, Group2=1.5690705441445522E-11}"/>
    <att type="integer" name="Nr. Genes0" value="3"/>
    <att type="string" name="Ontology Source0" value="GO_BiologicalProcess_05.05.2011_16h22"/>
    <att type="string" name="OverViewTerm0" value="FALSE"/>
    <att type="real" name="Term PValue Corrected with Bonferroni0" value="1.0"/>
    <att type="real" name="Term PValue0" value="0.023359776392096934"/>
    <att type="string" name="canonicalName" value="GO:00442420"/>
    <graphics type="ELLIPSE" h="30.0" w="30.0" x="567.0" y="630.0" fill="#02068d" width="1" outline="#000000"/>
  </node>
  <node label="GO:00441060" id="-167">
    <att type="real" name="% Associated Genes0" value="4.081632614135742"/>
    <att type="string" name="All Associated Genes0" value="[AIH, AK2, AK3, AKHSDH1, AKHSDH2, ALAAT1, ARD1, ARD2, ARD3, AT1G01480, AT1G05560, AT1G06570, AT1G08250, AT1G08630, AT1G09620, AT1G10070, AT1G11790, AT1G14610, AT1G15045, AT1G17745, AT1G18270, AT1G25220, AT1G25350, AT1G27140, AT1G29410, AT1G50200, AT1G52340, AT1G55920, AT1G62180, AT1G62800, AT1G62960, AT1G65960, AT1G66860, AT1G78660, AT1G78680, AT1G79440, AT2G02390, AT2G14750, AT2G16370, AT2G16500, AT2G22330, AT2G22810, AT2G26310, AT2G27450, AT2G27820, AT2G29690, AT2G31810, AT2G37550, AT2G39800, AT2G43090, AT2G44160, AT2G44170, AT3G01120, AT3G02470, AT3G04520, AT3G07630, AT3G09920, AT3G19710, AT3G23940, AT3G25900, AT3G29200, AT3G44720, AT3G47340, AT3G49700, AT3G59970, AT3G63250, AT3g04520/T27C4_17, AT4G04610, AT4G08040, AT4G11280, AT4G11850, AT4G14720, AT4G14910, AT4G21990, AT4G26200, AT4G26483, AT4G27070, AT4G28680, AT4G31180, AT4G31990, AT4G34570, AT4G34710, AT4G37770, AT4G38220, AT4G39280, AT4G39660, AT4G39940, AT4G39950, AT4G39980, AT4g11640, AT4g26300, AT4g34200, AT5G04230, AT5G05590, AT5G05730, AT5G05920, AT5G07440, AT5G10240, AT5G10880, AT5G10920, AT5G11520, AT5G12320, AT5G13280, AT5G16715, AT5G19530, AT5G19550, AT5G22630, AT5G23020, AT5G27380, AT5G37830, AT5G43850, AT5G48150, AT5G48220, AT5G49030, AT5G51690, AT5G53120, AT5G54080, AT5G57020, AT5G60540, AT5G62530, AT5G64813, AT5G65010, AT5G65800, AT5G66230, ATPLDDELTA, ATR1, ATSERAT1, ATSERAT2, At1g07780, At1g08630, At1g09795/F21M129, At1g10060, At1g10070, At1g11870, At1g12050, At1g13950, At1g14810, At1g17745, At1g17960, At1g18130, At1g18270, At1g22020, At1g22410, At1g25155, At1g25220, At1g26630, At1g27160, At1g28120, At1g29410, At1g29870, At1g31860, At1g32470, At1g33320, At1g35580, At1g36370, At1g44820, At1g51720, At1g53520, At1g60990, At1g63660, At1g64660/F1N193, At1g65960, At1g66200, At1g66530, At1g67990, At1g68420, At1g69370/F23O10_5, At1g69410, At1g69920, At1g72550, At1g74260, At1g74540, At1g74550, At1g75980, At1g78660, At1g78670, At1g79900, At1g80555, At2g02000/F14H20, At2g02010, At2g02380, At2g03667, At2g04400, At2g04842, At2g05830, At2g17265, At2g17630, At2g19070, At2g19940, At2g21550, At2g21940, At2g22910, At2g24850, At2g25840, At2g26310, At2g26310/T1D16, At2g28880, At2g30650, At2g30660, At2g31170, At2g31810, At2g33840, At2g35080, At2g35120, At2g37250, At2g37500, At2g38670, At2g43080, At2g43400, At2g45300, At2g46110, At3g02660, At3g02760, At3g03630, At3g04600, At3g06300, At3g10030, At3g11710, At3g13490, At3g15820, At3g16565, At3g17720, At3g17760, At3g18680, At3g19480, At3g22200, At3g22425, At3g22460, At3g23940, At3g24170, At3g25530, At3g25570, At3g27740, At3g30770, At3g49680, At3g53180/T4D210, At3g55400, At3g55610, At3g55870, At3g57050, At3g58140, At3g58180, At3g58610, At4g08870, At4g08900, At4g12130, At4g13780, At4g14710, At4g14910, At4g20930, At4g23590, At4g24830, At4g26870, At4g26900, At4g28420, At4g28680, At4g29210, At4g30550, At4g31990, At4g32520, At4g33010, At4g33510, At4g33760/T16L1_250, At4g35630, At4g38220, At4g39280, At4g39540/F23K16_170, At4g39640, At4g39650, At5g05270, At5g07440, At5g10330, At5g16290, At5g20980, At5g21060, At5g26780, At5g27470, At5g36160, At5g38200, At5g38530, At5g38830, At5g46180, At5g48220, At5g48840, At5g49030, At5g52520, At5g53850, At5g53970, At5g57850, At5g57890, At5g63910, At5g64050, At5g65010, At5g66120, AtATP-PRT1, AtCCT2, AtcysD2, BCAT1, BCAT2, BCAT3, BCAT5, BCAT6, BCAT7, BIG, CARB, CCT, CHI1, CHI2, CHY1, CIMS, CM2, CSR 1, CYP20-3, CYP83B1, Cyt ACS 1, DAP, DAPB1, DAPB2, DAPB3, DAPF, DHDPS1, DHDPS2, DHS2, ELI5, EMB1144, EMB86, ETFB, F10M2310, F11M157, F12E4_150, F12F1, F12F19, F12M12_70, F16M2_20, F18A580, F18O21_260, F19F1860, F20O900, F21E102, F24G2420, F27K19_50, F28J1220, F28J1230, F2A1930, F2J10, F4F7, F9D160, FOLB1, GAD, GCN2, GCR1, GDCSH, GDCSP, GDCST, GDH1, GDH2, GGH, GLN1-1, GLN1-2, GLN1-3, GLN1-4, GLN1-5, GLT1, GLU1, GLU2, GLYRS-1, GLYRS-2, GP ALPHA 1, GR, GS2, GSH3, HDH, HIS6, HMT3, HPA2, IIL1, IMDH1, IMDH2, IMDH3, IMPL2, IMS1, IPMS1, LYSA1, LYSA2, MCCA, MCCB, MEE32, METK3, METK4, MMT1, MTK, MTN1, MTN2, MTO1, NAGK, NAS1, NAS2, NAS3, NAS4, NFS2, NIFS, NP_001078324, NP_001154311, NP_001154640, NP_194570, NS2, OASA1, OASB, OASC, OMR1, OTC, P5CSA, P5CSB, PAL1, PAL2, PAL3, PAL4, PAO3, PAO4, PAT, PDX13, PHYLLO, PLDALPHA1, PLDALPHA2, PLDBETA1, PLDBETA2, PLDEPSILON, PLDGAMMA2, PLDGAMMA3, PLDZETA, POX1, POX2, PROC1, PSP, PYRB, Q41907, Q42021, Q8GW86, Q8LAA9, Q8LF92, Q93Z97, Q94A74, Q94AA6, Q9LG24, Q9LJT0, Q9LJT1, Q9LJT5, Q9LM23, Q9LPP9, Q9LQR9, Q9LQU9, Q9LQY8, Q9SGN2, RML1, RTY/SUR1, SAM1, SAM2, SAMDC1, SAMDC2, SAT2, SAT4, SDH, SGT1, SHM1, SPDSYN1, SPDSYN2, SYNC1, SYNC3, SYNO, T16L150, T17J13, T18F153, T19B17, T22F80, T24P22, T28A8_90, T31P16_230, T32N15, T4D210, T9J141, THRRS, TS1, TS2, TSB1, TYRAAT1, TYRAAT2, WIN1, atms2, dl3005c, oas5]"/>
    <att type="string" name="Associated Genes Found0" value="[AT1G10070, AT1G17745, AT2G02390, AT2G22330, AT3G44720, AT3G47340, AT3G59970, AT4G11280, AT4G21990, AT4G27070, AT4G39950, AT4G39980, AT5G05730, AT5G07440, AT5G10240, AT5G16715, AT5G48220, AT5G53120, AT5G54080, AT5G65010]"/>
    <att type="string" name="GOGroups0" value="[Group11, Group2]"/>
    <att type="string" name="GOID0" value="GO:0044106"/>
    <att type="string" name="GOLevels0" value="[4]"/>
    <att type="string" name="GOTerm0" value="cellular amine metabolic process"/>
    <att type="string" name="Group PValue Corrected with Bonferroni0" value="{Group11=1.5686285002411636E-22, Group2=2.667419925045739E-10}"/>
    <att type="string" name="Group PValue0" value="{Group11=9.227226472006844E-24, Group2=1.5690705441445522E-11}"/>
    <att type="integer" name="Nr. Genes0" value="20"/>
    <att type="string" name="Ontology Source0" value="GO_BiologicalProcess_05.05.2011_16h22"/>
    <att type="string" name="OverViewTerm0" value="FALSE"/>
    <att type="real" name="Term PValue Corrected with Bonferroni0" value="0.002022256917032931"/>
    <att type="real" name="Term PValue0" value="1.3572194074046516E-5"/>
    <att type="string" name="canonicalName" value="GO:00441060"/>
    <graphics type="ELLIPSE" h="50.0" w="50.0" x="417.0" y="841.0" fill="#02068d" width="1" outline="#000000"/>
  </node>
  <node label="GO:00439000" id="-166">
    <att type="real" name="% Associated Genes0" value="18.518518447875977"/>
    <att type="string" name="All Associated Genes0" value="[AT1G02450, AT1G80840, AT2G13680, AT2G22330, AT3G26830, AT4G11260, AT4G18470, AT4G31800, AT5G12180, AT5G13220, AT5G19360, AT5G23570, AT5G35620, AT5G60410, At1g60420, At2g25620, At3g09940, At5g22330, CALS9, DHAR1, GH32, ILL5, ILL6, KIN11, RABA4D, RAP1, SGT1A]"/>
    <att type="string" name="Associated Genes Found0" value="[AT1G02450, AT2G22330, AT3G26830, AT4G31800, AT5G13220]"/>
    <att type="string" name="GOGroups0" value="[Group11]"/>
    <att type="string" name="GOID0" value="GO:0043900"/>
    <att type="string" name="GOLevels0" value="[3]"/>
    <att type="string" name="GOTerm0" value="regulation of multi-organism process"/>
    <att type="string" name="Group PValue Corrected with Bonferroni0" value="{Group11=1.5686285002411636E-22}"/>
    <att type="string" name="Group PValue0" value="{Group11=9.227226472006844E-24}"/>
    <att type="integer" name="Nr. Genes0" value="5"/>
    <att type="string" name="Ontology Source0" value="GO_BiologicalProcess_05.05.2011_16h22"/>
    <att type="string" name="OverViewTerm0" value="FALSE"/>
    <att type="real" name="Term PValue Corrected with Bonferroni0" value="0.004263564608311084"/>
    <att type="real" name="Term PValue0" value="2.861452757255761E-5"/>
    <att type="string" name="canonicalName" value="GO:00439000"/>
    <graphics type="ELLIPSE" h="50.0" w="50.0" x="968.7715454101562" y="996.9501342773438" fill="#02068d" width="1" outline="#000000"/>
  </node>
  <node label="GO:00436870" id="-165">
    <att type="real" name="% Associated Genes0" value="9.615385055541992"/>
    <att type="string" name="All Associated Genes0" value="[AT1G14400, AT1G16890, AT1G17280, AT1G23260, AT1G45050, AT1G50490, AT1G53020, AT1G63800, AT1G70660, AT1G75440, AT1G78870, AT2G02760, AT2G16740, AT2G33770, AT2G36060, AT2G46030, AT3G08690, AT3G13550, AT3G17000, AT3G20060, AT3G46460, AT3G52560, AT3G55380, AT3G57870, AT4G36410, AT4G36800, AT5G05080, AT5G08335, AT5G23320, AT5G25760, AT5G41340, AT5G41700, AT5G42990, AT5G50870, AT5G53300, AT5G56150, AT5G59300, AT5G62540, At2g32790, At5g59500, F14G240, F14G241, Q9LQI1, RCE2, UBC12, UBC23, UBC25, UBC28, UBC31, UBC33, UBC37, UBC9]"/>
    <att type="string" name="Associated Genes Found0" value="[AT2G33770, AT3G08690, AT3G17000, AT5G53300, AT5G56150]"/>
    <att type="string" name="GOGroups0" value="[None]"/>
    <att type="string" name="GOID0" value="GO:0043687"/>
    <att type="string" name="GOLevels0" value="[5, 6]"/>
    <att type="string" name="GOTerm0" value="post-translational protein modification"/>
    <att type="string" name="Group PValue Corrected with Bonferroni0" value="{None=NaN}"/>
    <att type="string" name="Group PValue0" value="{None=NaN}"/>
    <att type="integer" name="Nr. Genes0" value="5"/>
    <att type="string" name="Ontology Source0" value="GO_BiologicalProcess_05.05.2011_16h22"/>
    <att type="string" name="OverViewTerm0" value="FALSE"/>
    <att type="real" name="Term PValue Corrected with Bonferroni0" value="0.10403894576010439"/>
    <att type="real" name="Term PValue0" value="6.98247958121506E-4"/>
    <att type="string" name="canonicalName" value="GO:00436870"/>
    <graphics type="ELLIPSE" h="30.0" w="30.0" x="0.0" y="2748.0" fill="#ffffff" width="1" outline="#000000"/>
  </node>
  <node label="GO:00436480" id="-164">
    <att type="real" name="% Associated Genes0" value="5.063291072845459"/>
    <att type="string" name="All Associated Genes0" value="[AT1G08250, AT1G11790, AT1G29410, AT1G62800, AT1G79440, AT2G27820, AT2G29690, AT2G37550, AT3G07630, AT3G29200, AT3G44720, AT4G27070, AT4G31990, AT4G39980, AT5G05590, AT5G05730, AT5G11520, AT5G19550, AT5G22630, AT5G48150, ATNADP-ME2, ATR1, At1g04410, At1g07780, At1g22410, At1g29410, At1g53240, At1g69370/F23O10_5, At1g79750, At2g04400, At2g13560, At2g19900/F6F22, At2g21940, At2g22780, At2g28880, At2g45300, At3g15020, At3g22200, At3g47520, At3g55870, At4g00570, At4g33510, At4g39540/F23K16_170, At5g09660, At5g25880, At5g38530, At5g43330, At5g50210, At5g50950, At5g56720, At5g58330, At5g66120, BIG, CM2, CYP83B1, DAP, DAPB1, DAPB2, DAPB3, DAPF, DHDPS1, DHDPS2, DHS2, EMB1144, F27K19_50, F5K20_210, FUM1, FUM2, GCR1, GP ALPHA 1, LYSA1, LYSA2, MEE32, PAT, Q9MA03, T24P22, TSB1, TYRAAT1, TYRAAT2]"/>
    <att type="string" name="Associated Genes Found0" value="[AT3G44720, AT4G27070, AT4G39980, AT5G05730]"/>
    <att type="string" name="GOGroups0" value="[Group11, Group2]"/>
    <att type="string" name="GOID0" value="GO:0043648"/>
    <att type="string" name="GOLevels0" value="[6]"/>
    <att type="string" name="GOTerm0" value="dicarboxylic acid metabolic process"/>
    <att type="string" name="Group PValue Corrected with Bonferroni0" value="{Group11=1.5686285002411636E-22, Group2=2.667419925045739E-10}"/>
    <att type="string" name="Group PValue0" value="{Group11=9.227226472006844E-24, Group2=1.5690705441445522E-11}"/>
    <att type="integer" name="Nr. Genes0" value="4"/>
    <att type="string" name="Ontology Source0" value="GO_BiologicalProcess_05.05.2011_16h22"/>
    <att type="string" name="OverViewTerm0" value="FALSE"/>
    <att type="real" name="Term PValue Corrected with Bonferroni0" value="1.0"/>
    <att type="real" name="Term PValue0" value="0.022890583282604793"/>
    <att type="string" name="canonicalName" value="GO:00436480"/>
    <graphics type="ELLIPSE" h="30.0" w="30.0" x="416.0" y="1032.0" fill="#02068d" width="1" outline="#000000"/>
  </node>
  <node label="GO:00434670" id="-163">
    <att type="real" name="% Associated Genes0" value="11.764705657958984"/>
    <att type="string" name="All Associated Genes0" value="[AT3G11670, AT3G15850, AT3G54320, AT5G57050, C7A1030, DEGP7, FAD6, PAP12, PHYLLO, PSAG, PSBO1, PSBO2, STN7, STN8, VAR1, VAR2, psbZ]"/>
    <att type="string" name="Associated Genes Found0" value="[AT3G15850, AT5G57050]"/>
    <att type="string" name="GOGroups0" value="[Group2, Group5]"/>
    <att type="string" name="GOID0" value="GO:0043467"/>
    <att type="string" name="GOLevels0" value="[5]"/>
    <att type="string" name="GOTerm0" value="regulation of generation of precursor metabolites and energy"/>
    <att type="string" name="Group PValue Corrected with Bonferroni0" value="{Group2=2.667419925045739E-10, Group5=2.6136523534972203E-9}"/>
    <att type="string" name="Group PValue0" value="{Group2=1.5690705441445522E-11, Group5=1.5374425608807179E-10}"/>
    <att type="integer" name="Nr. Genes0" value="2"/>
    <att type="string" name="Ontology Source0" value="GO_BiologicalProcess_05.05.2011_16h22"/>
    <att type="string" name="OverViewTerm0" value="FALSE"/>
    <att type="real" name="Term PValue Corrected with Bonferroni0" value="1.0"/>
    <att type="real" name="Term PValue0" value="0.022026255937355736"/>
    <att type="string" name="canonicalName" value="GO:00434670"/>
    <graphics type="ELLIPSE" h="30.00006103515625" w="30.000030517578125" x="473.53614807128906" y="491.9203796386719" fill="#4d1a74" width="1" outline="#000000"/>
  </node>
  <node label="GO:00434500" id="-162">
    <att type="real" name="% Associated Genes0" value="13.636363983154297"/>
    <att type="string" name="All Associated Genes0" value="[AT1G01480, AT1G05010, AT1G62380, AT2G19590, AT2G22810, AT3G15010, AT3G49700, AT4G08040, AT4G11280, AT4G26200, AT4G37770, AT5G13520, AT5G65800, At1g12010, At1g73500/T9L24_8, At1g77330, At2g41060, OASB, PIL6, RUB1, SAM1, T8M16_190]"/>
    <att type="string" name="Associated Genes Found0" value="[AT1G05010, AT1G62380, AT4G11280]"/>
    <att type="string" name="GOGroups0" value="[Group8]"/>
    <att type="string" name="GOID0" value="GO:0043450"/>
    <att type="string" name="GOLevels0" value="[4]"/>
    <att type="string" name="GOTerm0" value="alkene biosynthetic process"/>
    <att type="string" name="Group PValue Corrected with Bonferroni0" value="{Group8=1.9149650656212817E-4}"/>
    <att type="string" name="Group PValue0" value="{Group8=1.126450038600754E-5}"/>
    <att type="integer" name="Nr. Genes0" value="3"/>
    <att type="string" name="Ontology Source0" value="GO_BiologicalProcess_05.05.2011_16h22"/>
    <att type="string" name="OverViewTerm0" value="FALSE"/>
    <att type="real" name="Term PValue Corrected with Bonferroni0" value="0.4749076361937524"/>
    <att type="real" name="Term PValue0" value="0.0031872995717701505"/>
    <att type="string" name="canonicalName" value="GO:00434500"/>
    <graphics type="ELLIPSE" h="30.0" w="30.0" x="1679.0" y="1320.0" fill="#8bac27" width="1" outline="#000000"/>
  </node>
  <node label="GO:00434490" id="-161">
    <att type="real" name="% Associated Genes0" value="13.636363983154297"/>
    <att type="string" name="All Associated Genes0" value="[AT1G01480, AT1G05010, AT1G62380, AT2G19590, AT2G22810, AT3G15010, AT3G49700, AT4G08040, AT4G11280, AT4G26200, AT4G37770, AT5G13520, AT5G65800, At1g12010, At1g73500/T9L24_8, At1g77330, At2g41060, OASB, PIL6, RUB1, SAM1, T8M16_190]"/>
    <att type="string" name="Associated Genes Found0" value="[AT1G05010, AT1G62380, AT4G11280]"/>
    <att type="string" name="GOGroups0" value="[Group8]"/>
    <att type="string" name="GOID0" value="GO:0043449"/>
    <att type="string" name="GOLevels0" value="[3]"/>
    <att type="string" name="GOTerm0" value="cellular alkene metabolic process"/>
    <att type="string" name="Group PValue Corrected with Bonferroni0" value="{Group8=1.9149650656212817E-4}"/>
    <att type="string" name="Group PValue0" value="{Group8=1.126450038600754E-5}"/>
    <att type="integer" name="Nr. Genes0" value="3"/>
    <att type="string" name="Ontology Source0" value="GO_BiologicalProcess_05.05.2011_16h22"/>
    <att type="string" name="OverViewTerm0" value="FALSE"/>
    <att type="real" name="Term PValue Corrected with Bonferroni0" value="0.4749076361937524"/>
    <att type="real" name="Term PValue0" value="0.0031872995717701505"/>
    <att type="string" name="canonicalName" value="GO:00434490"/>
    <graphics type="ELLIPSE" h="30.0" w="30.0" x="1729.0" y="1325.0" fill="#8bac27" width="1" outline="#000000"/>
  </node>
  <node label="GO:00434360" id="-160">
    <att type="real" name="% Associated Genes0" value="4.255319118499756"/>
    <att type="string" name="All Associated Genes0" value="[20ox1, 20ox2, 20ox3, 4CLL5, 4CLL7, 4CLL9, A0MF23, ACC2, ACL1, ACO3, ACP-1, AK2, AK3, AKHSDH1, AKHSDH2, ALAAT1, AMPBP7, ARD1, ARD2, ARD3, AT1G01480, AT1G01610, AT1G02205, AT1G02860, AT1G03000, AT1G04580, AT1G04640, AT1G05160, AT1G05560, AT1G06080, AT1G06290, AT1G06570, AT1G07720, AT1G08250, AT1G08630, AT1G09620, AT1G10070, AT1G11790, AT1G13280, AT1G14520, AT1G14610, AT1G15045, AT1G15550, AT1G16540, AT1G17745, AT1G18270, AT1G19640, AT1G22640, AT1G25220, AT1G25350, AT1G27140, AT1G29410, AT1G30100, AT1G49430, AT1G50200, AT1G51500, AT1G52340, AT1G53000, AT1G55020, AT1G55920, AT1G62180, AT1G62380, AT1G62800, AT1G62960, AT1G65960, AT1G66860, AT1G72970, AT1G73250, AT1G74710, AT1G76690, AT1G78390, AT1G78660, AT1G78680, AT1G79440, AT1G79810, AT1G80340, AT2G02390, AT2G11810, AT2G14750, AT2G15090, AT2G16370, AT2G16500, AT2G18790, AT2G18950, AT2G19590, AT2G19800, AT2G22330, AT2G22810, AT2G26310, AT2G26350, AT2G27150, AT2G27820, AT2G28630, AT2G29690, AT2G29980, AT2G31360, AT2G31810, AT2G32440, AT2G37550, AT2G38110, AT2G39800, AT2G43090, AT2G43360, AT2G44160, AT2G44810, AT2G45690, AT3G01120, AT3G02580, AT3G04520, AT3G07560, AT3G07630, AT3G09920, AT3G11430, AT3G14440, AT3G15850, AT3G19710, AT3G23940, AT3G24220, AT3G25760, AT3G25770, AT3G25780, AT3G25900, AT3G29200, AT3G44720, AT3G47340, AT3G49700, AT3G51840, AT3G52200, AT3G54010, AT3G59970, AT3G63250, AT3g04520/T27C4_17, AT4G00360, AT4G00400, AT4G02780, AT4G04610, AT4G08040, AT4G11280, AT4G14720, AT4G14850, AT4G14910, AT4G15090, AT4G16760, AT4G18350, AT4G21990, AT4G22753, AT4G26200, AT4G26260, AT4G26483, AT4G26850, AT4G27070, AT4G28680, AT4G29010, AT4G31180, AT4G31990, AT4G33950, AT4G34510, AT4G34570, AT4G34710, AT4G35260, AT4G36220, AT4G37770, AT4G38220, AT4G39030, AT4G39280, AT4G39660, AT4G39940, AT4G39950, AT4G39980, AT4g11640, AT4g13050, AT4g26300, AT4g34200, AT5G03730, AT5G04230, AT5G05590, AT5G05730, AT5G05920, AT5G07440, AT5G10160, AT5G10240, AT5G10480, AT5G10880, AT5G10920, AT5G11520, AT5G12320, AT5G13280, AT5G13520, AT5G13790, AT5G15530, AT5G16715, AT5G19550, AT5G20410, AT5G20960, AT5G22630, AT5G23020, AT5G23190, AT5G25760, AT5G27380, AT5G36880, AT5G37300, AT5G37830, AT5G42650, AT5G43850, AT5G46240, AT5G46290, AT5G47120, AT5G48150, AT5G48220, AT5G49030, AT5G49070, AT5G51690, AT5G54080, AT5G55120, AT5G56640, AT5G57800, AT5G60540, AT5G62530, AT5G64813, AT5G65010, AT5G65110, AT5G65800, AT5G66230, ATNADP-ME2, ATPLDDELTA, ATR1, ATS1, ATSERAT1, ATSERAT2, A_TM021B04, At1g01280, At1g01600, At1g02205, At1g02400, At1g04410, At1g06090, At1g06100, At1g06120, At1g06350, At1g06360, At1g07420, At1g07780, At1g08510/T27G79, At1g08630, At1g08980, At1g09795/F21M129, At1g10060, At1g10070, At1g10670, At1g11870, At1g12050, At1g13950, At1g14290, At1g14810, At1g17745, At1g17960, At1g18130, At1g18270, At1g22020, At1g22410, At1g24360, At1g25155, At1g25220, At1g26630, At1g27160, At1g27980, At1g28120, At1g29410, At1g29870, At1g30120, At1g31860, At1g32440, At1g32470, At1g33320, At1g35580, At1g36370, At1g44090, At1g44820, At1g47578, At1g47990, At1g51720, At1g53240, At1g53520, At1g54220, At1g57750, At1g60990, At1g61850, At1g62640, At1g63660, At1g63710, At1g64660/F1N193, At1g65290, At1g65520, At1g65930, At1g65960, At1g66200, At1g66530, At1g67070, At1g67080, At1g67730, At1g68320, At1g68420, At1g69370/F23O10_5, At1g69410, At1g69640, At1g69920, At1g72550, At1g73680, At1g74260, At1g75980, At1g78660, At1g78670, At1g79750, At1g79900, At1g80330, At1g80555, At2g02000/F14H20, At2g02010, At2g02380, At2g03667, At2g04240, At2g04400, At2g04842, At2g05830, At2g05990, At2g13560, At2g14060, At2g17265, At2g17630, At2g19900/F6F22, At2g19940, At2g21550, At2g21940, At2g22230, At2g22780, At2g22910, At2g23560, At2g23580, At2g23600, At2g23620, At2g24850, At2g25840, At2g26310, At2g26310/T1D16, At2g26560/T9J223, At2g28880, At2g29390, At2g30200, At2g30650, At2g30660, At2g31170, At2g31810, At2g33380/F4P95, At2g33840, At2g35080, At2g35120, At2g37250, At2g37500, At2g37700, At2g43080, At2g43400, At2g44620, At2g45300, At2g46110, At2g46210, At3g01420/T13O15, At3g02660, At3g02760, At3g03480, At3g03630, At3g04600, At3g05290, At3g06300, At3g10030, At3g10870, At3g11710, At3g12990, At3g13490, At3g13930, At3g15020, At3g15290, At3g16565, At3g16950, At3g17720, At3g17760, At3g18680, At3g19480, At3g21780, At3g22200, At3g22425, At3g22460, At3g23940, At3g24170, At3g25110, At3g25530, At3g27740, At3g30770, At3g45770, At3g47520, At3g49680, At3g53180/T4D210, At3g55400, At3g55610, At3g55870, At3g57050, At3g58140, At3g58180, At3g58610, At4g00570, At4g04320, At4g08870, At4g08900, At4g12110, At4g12130, At4g13780, At4g14710, At4g14910, At4g20930, At4g22753, At4g22756, At4g23590, At4g24670, At4g24830, At4g26870, At4g26900, At4g28420, At4g28680, At4g29210, At4g30550, At4g31990, At4g32520, At4g33010, At4g33510, At4g33760/T16L1_250, At4g35630, At4g38220, At4g39280, At4g39540/F23K16_170, At4g39640, At4g39650, At5g04620, At5g05270, At5g07010, At5g07440, At5g09660, At5g10330, At5g14590, At5g16290, At5g20980, At5g21060, At5g25880, At5g26780, At5g27470, At5g27520, At5g28840, At5g36160, At5g38020, At5g38200, At5g38530, At5g38830, At5g42890, At5g43280, At5g43330, At5g46180, At5g47630, At5g48220, At5g48840, At5g49030, At5g50210, At5g50950, At5g52520, At5g52570, At5g52920, At5g53850, At5g53970, At5g55240, At5g56720, At5g57590, At5g57850, At5g57890, At5g58330, At5g60600, At5g61780, At5g63910, At5g64050, At5g65010, At5g66120, At5g67030, At5g67160, AtATP-PRT1, AtHDC, AtcysD2, BCAT1, BCAT2, BCAT3, BCAT5, BCAT6, BCAT7, BGLU18, BIG, C7A1010, CAC1, CAC2, CAC3, CARB, CER1-like, CHI1, CHI2, CHY1, CIMS, CLA1, CM2, CSR 1, CTIMC, CYP20-3, CYP707A1, CYP707A2, CYP707A3, CYP83B1, CYP86A1, CYP86A8, Cyt ACS 1, DAP, DAPB1, DAPB2, DAPB3, DAPF, DCR, DGL, DHDPS1, DHDPS2, DHS2, DXR, ECH2, ELI5, EMB1144, EMB86, ETFB, F10M1020, F10M2310, F10M2370, F11M157, F12E4_150, F12F1, F12F19, F12M12_70, F13M2390, F16M2_20, F18A580, F18K105, F18O21_260, F19F1860, F20O900, F21E102, F24G2420, F27K19_50, F28J1220, F28J1230, F2A1930, F2J10, F3O94, F4F7, F5K20_210, F6I180, F8F6_70, F9D160, FAB1, FAD2, FAD6, FAD7, FAD8, FAR3, FAR4, FAR5, FLU, FOLB1, FUM1, FUM2, GA2, GA2OX7, GAD, GALAK, GCN2, GCR1, GDCSH, GDCSP, GDCST, GDH1, GDH2, GGH, GH32, GLN1-1, GLN1-2, GLN1-3, GLN1-4, GLN1-5, GLT1, GLU1, GLU2, GLYRS-1, GLYRS-2, GP ALPHA 1, GR, GS2, GSH3, HDF7, HDH, HHT1, HIS6, HMT3, HPA2, ICDH, ICL, IDH5, IDH6, IIL1, IMDH1, IMDH2, IMDH3, IMPL2, IMS1, IPMS1, ISPD, JAR1, KAS, KAS1, KAT5, KCS1, KCS10, KCS11, KCS13, KCS14, KCS16, KCS18, KCS19, KCS2, KCS20, KCS21, KCS4, KCS5, KCS6, KCS7, KCS9, KIN10, KIN11, KINB1, KINB2, KING1, KO1, L73G190, LACS1, LACS3, LACS4, LACS5, LACS6, LACS7, LACS8, LACS9, LIP2p, LOX2, LOX3, LOX4, LOX5, LOX6, LTA2, LYSA1, LYSA2, MAM1, MAM2, MCCA, MCCB, MEE32, METK3, METK4, MFP2, MMT1, MTK, MTN1, MTN2, MTO1, NAGK, NAS1, NAS2, NAS3, NAS4, NFS2, NFXL1, NIFS, NIT1, NIT2, NP_001078324, NP_001154311, NP_001154640, NP_194570, NS2, OASA1, OASB, OASC, OMR1, OPR1, OPR3, OTC, P5CSA, P5CSB, PAL1, PAL2, PAL3, PAL4, PAT, PDX13, PED1, PEX1, PEX12, PHYLLO, PLDALPHA1, PMM, POX1, POX2, PROC1, PSP, PYRB, Q41907, Q42021, Q8LAA9, Q8LF92, Q93Z97, Q94A74, Q94AA6, Q9LG24, Q9LJT0, Q9LJT1, Q9LJT5, Q9LM23, Q9LPP9, Q9LQR9, Q9LQU9, Q9LQY8, Q9MA03, Q9SGN2, Q9SKV1, RML1, RTY/SUR1, S-ACP-DES1, S-ACP-DES2, S-ACP-DES3, S-ACP-DES4, S-ACP-DES5, S-ACP-DES6, SAM1, SAM2, SAT2, SAT4, SDH, SGT1, SHM1, SMO, SSI2, SYNC1, SYNC3, SYNO, T13K140, T16L150, T16L160, T17J13, T18F153, T19B17, T1E22_60, T1J1, T22E16, T24P22, T28A8_90, T31P16_230, T32N15, T4D210, T9J141, TAA1, THRRS, TS1, TS2, TSB1, TYRAAT1, TYRAAT2, UROS, USP, VDE1, VTC4, VTE1, WIN1, Z973356, accD, atms2, cer2, cyt1, dl3005c, dl3255c, dl3260c, hsr1, oas5, sld1]"/>
    <att type="string" name="Associated Genes Found0" value="[AT1G02205, AT1G07720, AT1G10070, AT1G17745, AT1G51500, AT1G62380, AT2G02390, AT2G22330, AT3G15850, AT3G25780, AT3G44720, AT3G47340, AT3G51840, AT3G59970, AT4G00400, AT4G11280, AT4G16760, AT4G21990, AT4G27070, AT4G39950, AT4G39980, AT5G05730, AT5G07440, AT5G10160, AT5G10240, AT5G10480, AT5G16715, AT5G20960, AT5G36880, AT5G46240, AT5G48220, AT5G54080, AT5G65010, AT5G65110]"/>
    <att type="string" name="GOGroups0" value="[Group11, Group2]"/>
    <att type="string" name="GOID0" value="GO:0043436"/>
    <att type="string" name="GOLevels0" value="[4]"/>
    <att type="string" name="GOTerm0" value="oxoacid metabolic process"/>
    <att type="string" name="Group PValue Corrected with Bonferroni0" value="{Group11=1.5686285002411636E-22, Group2=2.667419925045739E-10}"/>
    <att type="string" name="Group PValue0" value="{Group11=9.227226472006844E-24, Group2=1.5690705441445522E-11}"/>
    <att type="integer" name="Nr. Genes0" value="34"/>
    <att type="string" name="Ontology Source0" value="GO_BiologicalProcess_05.05.2011_16h22"/>
    <att type="string" name="OverViewTerm0" value="FALSE"/>
    <att type="real" name="Term PValue Corrected with Bonferroni0" value="5.385444649402027E-7"/>
    <att type="real" name="Term PValue0" value="3.6143923821490113E-9"/>
    <att type="string" name="canonicalName" value="GO:00434360"/>
    <graphics type="ELLIPSE" h="50.0" w="50.0" x="389.3262634277344" y="806.53125" fill="#02068d" width="1" outline="#000000"/>
  </node>
  <node label="GO:00431550" id="-159">
    <att type="real" name="% Associated Genes0" value="22.22222137451172"/>
    <att type="string" name="All Associated Genes0" value="[AT3G15850, AT5G57050, DEGP7, FAD6, PAP12, PSBO1, PSBO2, VAR1, VAR2]"/>
    <att type="string" name="Associated Genes Found0" value="[AT3G15850, AT5G57050]"/>
    <att type="string" name="GOGroups0" value="[Group2, Group5]"/>
    <att type="string" name="GOID0" value="GO:0043155"/>
    <att type="string" name="GOLevels0" value="[6, 7]"/>
    <att type="string" name="GOTerm0" value="negative regulation of photosynthesis, light reaction"/>
    <att type="string" name="Group PValue Corrected with Bonferroni0" value="{Group2=2.667419925045739E-10, Group5=2.6136523534972203E-9}"/>
    <att type="string" name="Group PValue0" value="{Group2=1.5690705441445522E-11, Group5=1.5374425608807179E-10}"/>
    <att type="integer" name="Nr. Genes0" value="2"/>
    <att type="string" name="Ontology Source0" value="GO_BiologicalProcess_05.05.2011_16h22"/>
    <att type="string" name="OverViewTerm0" value="FALSE"/>
    <att type="real" name="Term PValue Corrected with Bonferroni0" value="0.9332553429838425"/>
    <att type="real" name="Term PValue0" value="0.006263458677743909"/>
    <att type="string" name="canonicalName" value="GO:00431550"/>
    <graphics type="ELLIPSE" h="30.0" w="30.0" x="537.464599609375" y="441.6985778808594" fill="#4d1a74" width="1" outline="#000000"/>
  </node>
  <node label="GO:00427420" id="-158">
    <att type="real" name="% Associated Genes0" value="5.339805603027344"/>
    <att type="string" name="All Associated Genes0" value="[ABCG36, AT1G02450, AT1G02860, AT1G12220, AT1G16540, AT1G18570, AT1G19180, AT1G24100, AT1G27320, AT1G33520, AT1G56360, AT1G66340, AT1G74710, AT1G80840, AT2G22330, AT2G24570, AT2G25000, AT2G26330, AT2G27040, AT2G30770, AT2G38470, AT2G39940, AT2G41560, AT2G43790, AT3G15210, AT3G20600, AT3G20770, AT3G44880, AT3G57330, AT4G11850, AT4G12720, AT4G14400, AT4G15900, AT4G19660, AT4G23190, AT4G26070, AT4G26850, AT4G31550, AT4G31800, AT4G33950, AT4G35450, AT4G39090, AT4G39950, AT4g09650, AT5G13160, AT5G40990, AT5G44070, AT5G47220, AT5G51700, AT5G59890, AT5G60410, ATGSTF6, ATGSTF8, ATMKK3, ATNRAMP4, At1g02120, At1g07360, At1g09340, At1g13440, At1g18350, At1g26630, At1g32060, At1g32230, At1g51890, At1g52740, At1g53130, At1g53240, At1g65930, At1g73260, At2g20310, At2g22240, At2g25110, At2g30860, At2g34690, At2g37660, At2g40000, At3g15020, At3g17210, At3g55800, At4g01050, At4g08900, At4g14465/FCAALL96, At4g36290, At4g37460/F6G17_110, At5g06290, At5g06320, At5g09230, At5g17880, At5g19510, At5g33340, At5g37055, At5g44510, At5g46470, At5g48810, At5g56360, At5g63840, At5g64440, BAK1, BAS1, BGLU26, CA1, CAF1-11, CAF1-9, CALS12, CESA4, CRK13, CRK19, CRK20, CRK4, CRK5, CRRSP2, CRT3, CYP20-3, CYP38, CYP83B1, EIL1, EIN2, EMB2024, ERF011, ESM1, ESP, F10M600, F14G92, F22O6_190, F9D1640, FLS2, FMO1, GCA2, GH32, GLIP2, GRF6, GSTF7, H2AV, HEMC, HSC70-1, HSP90-1, HSP90-2, HSR2, IPK1, IRX1, JAR1, LFNR1, LFNR2, MOS4, NFXL1, NPR3, NQR, NRAMP3, PAB2, PDH2, PEPR2, PER33, PER34, PIE1, PLDBETA1, PM24, POX1, PPA1, PR4, PRP19A, PRP19B, PRXIIE, PSBO1, PSBP1, PTR3-A, Q8L9L6, RCA, RIN4, RML1, RPL12C, RPS2, RPS4, RRF, SAS1, SD113, SIRK, SODA, SODCC, SPL14, T16H50, T19F6, T9J146, TCTP, TGA1, TGA3, TGA4, TGA7, TIP1-2, TSA1, TUF, U2AF65A, WIN1, WIN2, WOL, WRKY27, WRKY38, WRKY48, WRKY51, WRKY52, WRKY53, WRKY62, WRKY70, WRKY8, cyp81F2, cyt1, petC]"/>
    <att type="string" name="Associated Genes Found0" value="[AT1G02450, AT1G12220, AT1G18570, AT1G19180, AT2G22330, AT2G27040, AT2G30770, AT3G44880, AT4G31800, AT4G39950, AT5G44070]"/>
    <att type="string" name="GOGroups0" value="[Group11, Group17]"/>
    <att type="string" name="GOID0" value="GO:0042742"/>
    <att type="string" name="GOLevels0" value="[4, 5]"/>
    <att type="string" name="GOTerm0" value="defense response to bacterium"/>
    <att type="string" name="Group PValue Corrected with Bonferroni0" value="{Group11=1.5686285002411636E-22, Group17=0.0032000058459379366}"/>
    <att type="string" name="Group PValue0" value="{Group11=9.227226472006844E-24, Group17=1.8823563799634922E-4}"/>
    <att type="integer" name="Nr. Genes0" value="11"/>
    <att type="string" name="Ontology Source0" value="GO_BiologicalProcess_05.05.2011_16h22"/>
    <att type="string" name="OverViewTerm0" value="TRUE"/>
    <att type="real" name="Term PValue Corrected with Bonferroni0" value="0.018913778877874543"/>
    <att type="real" name="Term PValue0" value="1.269381132743258E-4"/>
    <att type="string" name="canonicalName" value="GO:00427420"/>
    <graphics type="ELLIPSE" h="50.0" w="50.0" x="1006.798828125" y="1172.3994140625" fill="#02068d" width="1" outline="#000000"/>
  </node>
  <node label="GO:00425940" id="-157">
    <att type="real" name="% Associated Genes0" value="5.333333492279053"/>
    <att type="string" name="All Associated Genes0" value="[AT1G27320, AT1G43700, AT1G55920, AT2G11810, AT2G19590, AT2G33770, AT2G45170, AT3G04530, AT3G16785, AT3G23430, AT3G47340, AT3G62980, AT4G00550, AT4G33030, AT4g04955, AT5G17290, AT5G20410, AT5G60410, AT5G61420, ATG12A, ATG12B, ATR1, At1g03380, At1g09020, At1g13300, At1g23010/F19G10_5, At1g54210, At1g54710, At1g68320, At2g22240, At2g26890, At3g03250, At3g03520, At3g09922, At3g18290, At3g27740, At3g55880, At3g61710, At3g62770, At5g07690, At5g21040, At5g23630, At5g26880, At5g42870, At5g45380, At5g48850, At5g54730, BGLU21, BHLH32, BHLH47, CARB, CAT1, CAT2, CIPK9, F11F8_14, GTE10, NIT3, PAP12, PCKA, PHF1, PHO1-H1, PHT1-1, PHT1-2, PLDEPSILON, PLDP2, PS2, PYRB, PYRE-F, SPX2, SPX3, SULTR1, T21P5, UPP, WOL, WRKY6]"/>
    <att type="string" name="Associated Genes Found0" value="[AT2G33770, AT2G45170, AT3G16785, AT3G47340]"/>
    <att type="string" name="GOGroups0" value="[Group1, Group4]"/>
    <att type="string" name="GOID0" value="GO:0042594"/>
    <att type="string" name="GOLevels0" value="[3, 5]"/>
    <att type="string" name="GOTerm0" value="response to starvation"/>
    <att type="string" name="Group PValue Corrected with Bonferroni0" value="{Group1=0.11288642812032629, Group4=0.0036532098882545404}"/>
    <att type="string" name="Group PValue0" value="{Group1=0.0066403781247250755, Group4=2.1489469930909062E-4}"/>
    <att type="integer" name="Nr. Genes0" value="4"/>
    <att type="string" name="Ontology Source0" value="GO_BiologicalProcess_05.05.2011_16h22"/>
    <att type="string" name="OverViewTerm0" value="FALSE"/>
    <att type="real" name="Term PValue Corrected with Bonferroni0" value="1.0"/>
    <att type="real" name="Term PValue0" value="0.01930688125936193"/>
    <att type="string" name="canonicalName" value="GO:00425940"/>
    <graphics type="ELLIPSE" h="30.0" w="29.99999237060547" x="48.88929748535156" y="1214.15869140625" fill="#1cf83d" width="1" outline="#000000"/>
  </node>
  <node label="GO:00425480" id="-156">
    <att type="real" name="% Associated Genes0" value="12.5"/>
    <att type="string" name="All Associated Genes0" value="[AT3G11670, AT3G15850, AT5G57050, C7A1030, DEGP7, FAD6, PAP12, PHYLLO, PSAG, PSBO1, PSBO2, STN7, STN8, VAR1, VAR2, psbZ]"/>
    <att type="string" name="Associated Genes Found0" value="[AT3G15850, AT5G57050]"/>
    <att type="string" name="GOGroups0" value="[Group2, Group5]"/>
    <att type="string" name="GOID0" value="GO:0042548"/>
    <att type="string" name="GOLevels0" value="[6]"/>
    <att type="string" name="GOTerm0" value="regulation of photosynthesis, light reaction"/>
    <att type="string" name="Group PValue Corrected with Bonferroni0" value="{Group2=2.667419925045739E-10, Group5=2.6136523534972203E-9}"/>
    <att type="string" name="Group PValue0" value="{Group2=1.5690705441445522E-11, Group5=1.5374425608807179E-10}"/>
    <att type="integer" name="Nr. Genes0" value="2"/>
    <att type="string" name="Ontology Source0" value="GO_BiologicalProcess_05.05.2011_16h22"/>
    <att type="string" name="OverViewTerm0" value="FALSE"/>
    <att type="real" name="Term PValue Corrected with Bonferroni0" value="1.0"/>
    <att type="real" name="Term PValue0" value="0.019609037702119848"/>
    <att type="string" name="canonicalName" value="GO:00425480"/>
    <graphics type="ELLIPSE" h="30.0" w="30.0" x="537.4058837890625" y="381.4308776855469" fill="#4d1a74" width="1" outline="#000000"/>
  </node>
  <node label="GO:00425450" id="-155">
    <att type="real" name="% Associated Genes0" value="4.424778938293457"/>
    <att type="string" name="All Associated Genes0" value="[ABCG36, ADPG2, AT1G18330, AT1G18570, AT1G19300, AT1G24100, AT1G66340, AT1G69940, AT2G22330, AT3G08550, AT3G54920, AT3G56960, AT3G57510, AT4G26850, AT4G39950, AT5G44070, AT5G55590, ATEXPB2, ATGH9B1, At3g03250, At3g42160, At5g01360, At5g06700, At5g17310, At5g61130, BGLU26, CALS12, CALS9, CESA4, CYP83B1, DOF3, EIN2, EXPA10, F14I3, FLS2, IRX1, IRX3, M4E130, MERI5, MUM2, O04050, PIP5K5, PME1, PME10, PME11, PME12, PME13, PME14, PME15, PME16, PME17, PME18, PME19, PME2, PME20, PME21, PME22, PME23, PME24, PME25, PME26, PME28, PME29, PME3, PME30, PME31, PME32, PME33, PME34, PME35, PME36, PME38, PME39, PME4, PME40, PME41, PME42, PME43, PME44, PME45, PME46, PME47, PME48, PME49, PME5, PME50, PME51, PME52, PME53, PME54, PME55, PME56, PME57, PME58, PME59, PME6, PME60, PME61, PME63, PME64, PME66, PME67, PME68, PME7, PME8, Q42261, QRT2, RML1, TSA1, VGDH2, XTH21, XTH33, cyp81F2]"/>
    <att type="string" name="Associated Genes Found0" value="[AT1G18570, AT1G19300, AT2G22330, AT4G39950, AT5G44070]"/>
    <att type="string" name="GOGroups0" value="[Group11]"/>
    <att type="string" name="GOID0" value="GO:0042545"/>
    <att type="string" name="GOLevels0" value="[4]"/>
    <att type="string" name="GOTerm0" value="cell wall modification"/>
    <att type="string" name="Group PValue Corrected with Bonferroni0" value="{Group11=1.5686285002411636E-22}"/>
    <att type="string" name="Group PValue0" value="{Group11=9.227226472006844E-24}"/>
    <att type="integer" name="Nr. Genes0" value="5"/>
    <att type="string" name="Ontology Source0" value="GO_BiologicalProcess_05.05.2011_16h22"/>
    <att type="string" name="OverViewTerm0" value="FALSE"/>
    <att type="real" name="Term PValue Corrected with Bonferroni0" value="1.0"/>
    <att type="real" name="Term PValue0" value="0.019362344782126208"/>
    <att type="string" name="canonicalName" value="GO:00425450"/>
    <graphics type="ELLIPSE" h="30.0" w="30.0" x="794.0" y="1223.0" fill="#02068d" width="1" outline="#000000"/>
  </node>
  <node label="GO:00424460" id="-153">
    <att type="real" name="% Associated Genes0" value="5.357142925262451"/>
    <att type="string" name="All Associated Genes0" value="[4CLL7, 4CLL9, AT1G25220, AT1G48910, AT2G22330, AT2G27150, AT3G50660, AT4G32540, AT4G36380, AT4G39950, AT5G05690, AT5G11320, AT5G20960, AT5G25620, At1g08980, At4g24670, At5g17300, BIG, BR6OX1, BR6OX2, CYP83B1, CYP90D1, DET2, DWF1, DWF5, IPT1, IPT2, IPT3, IPT4, IPT5, IPT6, IPT7, IPT8, IPT9, LOG1, LOG2, LOG3, LOG4, LOG5, LOG6, LOG7, LOG8, LOG9, NIT1, NIT2, RTY/SUR1, SHM1, TAA1, TSB1, YUC11, YUC2, YUC3, YUC5, YUC7, YUC8, YUC9]"/>
    <att type="string" name="Associated Genes Found0" value="[AT2G22330, AT4G39950, AT5G20960]"/>
    <att type="string" name="GOGroups0" value="[Group11]"/>
    <att type="string" name="GOID0" value="GO:0042446"/>
    <att type="string" name="GOLevels0" value="[3, 5]"/>
    <att type="string" name="GOTerm0" value="hormone biosynthetic process"/>
    <att type="string" name="Group PValue Corrected with Bonferroni0" value="{Group11=1.5686285002411636E-22}"/>
    <att type="string" name="Group PValue0" value="{Group11=9.227226472006844E-24}"/>
    <att type="integer" name="Nr. Genes0" value="3"/>
    <att type="string" name="Ontology Source0" value="GO_BiologicalProcess_05.05.2011_16h22"/>
    <att type="string" name="OverViewTerm0" value="FALSE"/>
    <att type="real" name="Term PValue Corrected with Bonferroni0" value="1.0"/>
    <att type="real" name="Term PValue0" value="0.040955336803707346"/>
    <att type="string" name="canonicalName" value="GO:00424460"/>
    <graphics type="ELLIPSE" h="30.0" w="30.0" x="724.0" y="1003.0" fill="#02068d" width="1" outline="#000000"/>
  </node>
  <node label="GO:00424360" id="-152">
    <att type="real" name="% Associated Genes0" value="60.0"/>
    <att type="string" name="All Associated Genes0" value="[ABCG36, AT2G22330, AT4G39950, AT5G44070, BGLU26]"/>
    <att type="string" name="Associated Genes Found0" value="[AT2G22330, AT4G39950, AT5G44070]"/>
    <att type="string" name="GOGroups0" value="[Group11]"/>
    <att type="string" name="GOID0" value="GO:0042436"/>
    <att type="string" name="GOLevels0" value="[5]"/>
    <att type="string" name="GOTerm0" value="indole-containing compound catabolic process"/>
    <att type="string" name="Group PValue Corrected with Bonferroni0" value="{Group11=1.5686285002411636E-22}"/>
    <att type="string" name="Group PValue0" value="{Group11=9.227226472006844E-24}"/>
    <att type="integer" name="Nr. Genes0" value="3"/>
    <att type="string" name="Ontology Source0" value="GO_BiologicalProcess_05.05.2011_16h22"/>
    <att type="string" name="OverViewTerm0" value="FALSE"/>
    <att type="real" name="Term PValue Corrected with Bonferroni0" value="0.0036608059642910208"/>
    <att type="real" name="Term PValue0" value="2.456916754557732E-5"/>
    <att type="string" name="canonicalName" value="GO:00424360"/>
    <graphics type="ELLIPSE" h="50.0" w="50.0" x="645.0" y="1129.0" fill="#02068d" width="1" outline="#000000"/>
  </node>
  <node label="GO:00424350" id="-151">
    <att type="real" name="% Associated Genes0" value="23.52941131591797"/>
    <att type="string" name="All Associated Genes0" value="[AT1G18570, AT1G29410, AT2G22330, AT2G29690, AT2G30770, AT2G38470, AT2G43790, AT3G26830, AT3G45640, AT4G27070, AT4G39950, AT5G05590, AT5G05730, AT5G48150, ATR1, At1g07780, At1g08980, At1g29410, At1g69370/F23O10_5, At1g73500/T9L24_8, At2g04400, At3g55870, At4g24670, At5g38530, BIG, CYP83B1, F27K19_50, NIT1, NIT2, RML1, RTY/SUR1, TAA1, TSB1, cyp81F2]"/>
    <att type="string" name="Associated Genes Found0" value="[AT1G18570, AT2G22330, AT2G30770, AT3G26830, AT3G45640, AT4G27070, AT4G39950, AT5G05730]"/>
    <att type="string" name="GOGroups0" value="[Group11]"/>
    <att type="string" name="GOID0" value="GO:0042435"/>
    <att type="string" name="GOLevels0" value="[5]"/>
    <att type="string" name="GOTerm0" value="indole-containing compound biosynthetic process"/>
    <att type="string" name="Group PValue Corrected with Bonferroni0" value="{Group11=1.5686285002411636E-22}"/>
    <att type="string" name="Group PValue0" value="{Group11=9.227226472006844E-24}"/>
    <att type="integer" name="Nr. Genes0" value="8"/>
    <att type="string" name="Ontology Source0" value="GO_BiologicalProcess_05.05.2011_16h22"/>
    <att type="string" name="OverViewTerm0" value="FALSE"/>
    <att type="real" name="Term PValue Corrected with Bonferroni0" value="2.123226161919676E-6"/>
    <att type="real" name="Term PValue0" value="1.424984001288373E-8"/>
    <att type="string" name="canonicalName" value="GO:00424350"/>
    <graphics type="ELLIPSE" h="50.0" w="49.99993896484375" x="571.3488464355469" y="1124.6959228515625" fill="#02068d" width="1" outline="#000000"/>
  </node>
  <node label="GO:00424300" id="-150">
    <att type="real" name="% Associated Genes0" value="22.22222137451172"/>
    <att type="string" name="All Associated Genes0" value="[ABCG36, AT1G18570, AT1G29410, AT2G22330, AT2G29690, AT2G30770, AT2G38470, AT2G43790, AT3G26830, AT3G45640, AT4G27070, AT4G37430, AT4G39950, AT5G05590, AT5G05730, AT5G44070, AT5G48150, AT5G48220, ATR1, At1g07780, At1g08980, At1g21100, At1g21120, At1g29410, At1g69370/F23O10_5, At1g73500/T9L24_8, At2g04400, At3g10870, At3g55870, At4g24670, At4g37400, At5g38530, At5g48220, BGLU26, BIG, CYP83B1, F27K19_50, F6G170, NIT1, NIT2, RML1, RTY/SUR1, TAA1, TSB1, cyp81F2]"/>
    <att type="string" name="Associated Genes Found0" value="[AT1G18570, AT2G22330, AT2G30770, AT3G26830, AT3G45640, AT4G27070, AT4G39950, AT5G05730, AT5G44070, AT5G48220]"/>
    <att type="string" name="GOGroups0" value="[Group11]"/>
    <att type="string" name="GOID0" value="GO:0042430"/>
    <att type="string" name="GOLevels0" value="[4]"/>
    <att type="string" name="GOTerm0" value="indole-containing compound metabolic process"/>
    <att type="string" name="Group PValue Corrected with Bonferroni0" value="{Group11=1.5686285002411636E-22}"/>
    <att type="string" name="Group PValue0" value="{Group11=9.227226472006844E-24}"/>
    <att type="integer" name="Nr. Genes0" value="10"/>
    <att type="string" name="Ontology Source0" value="GO_BiologicalProcess_05.05.2011_16h22"/>
    <att type="string" name="OverViewTerm0" value="TRUE"/>
    <att type="real" name="Term PValue Corrected with Bonferroni0" value="5.774790124094965E-8"/>
    <att type="real" name="Term PValue0" value="3.8756980698623927E-10"/>
    <att type="string" name="canonicalName" value="GO:00424300"/>
    <graphics type="ELLIPSE" h="50.0" w="50.0" x="545.9669799804688" y="1173.3900146484375" fill="#02068d" width="1" outline="#000000"/>
  </node>
  <node label="GO:00424020" id="-149">
    <att type="real" name="% Associated Genes0" value="40.0"/>
    <att type="string" name="All Associated Genes0" value="[AT2G22330, AT4G39950, AT5G05920, PAO3, PAO4]"/>
    <att type="string" name="Associated Genes Found0" value="[AT2G22330, AT4G39950]"/>
    <att type="string" name="GOGroups0" value="[Group11]"/>
    <att type="string" name="GOID0" value="GO:0042402"/>
    <att type="string" name="GOLevels0" value="[4, 5, 6]"/>
    <att type="string" name="GOTerm0" value="cellular biogenic amine catabolic process"/>
    <att type="string" name="Group PValue Corrected with Bonferroni0" value="{Group11=1.5686285002411636E-22}"/>
    <att type="string" name="Group PValue0" value="{Group11=9.227226472006844E-24}"/>
    <att type="integer" name="Nr. Genes0" value="2"/>
    <att type="string" name="Ontology Source0" value="GO_BiologicalProcess_05.05.2011_16h22"/>
    <att type="string" name="OverViewTerm0" value="FALSE"/>
    <att type="real" name="Term PValue Corrected with Bonferroni0" value="0.2687561042602332"/>
    <att type="real" name="Term PValue0" value="0.0018037322433572698"/>
    <att type="string" name="canonicalName" value="GO:00424020"/>
    <graphics type="ELLIPSE" h="30.0" w="30.0" x="851.0" y="1113.0" fill="#02068d" width="1" outline="#000000"/>
  </node>
  <node label="GO:00424010" id="-148">
    <att type="real" name="% Associated Genes0" value="7.692307472229004"/>
    <att type="string" name="All Associated Genes0" value="[AIH, AT1G29410, AT2G16500, AT2G27450, AT2G29690, AT3G02470, AT4G26483, AT4G27070, AT4G34710, AT5G05590, AT5G05730, AT5G19530, AT5G48150, AT5G53120, AT5G57020, ATR1, At1g07780, At1g29410, At1g67990, At1g69370/F23O10_5, At2g04400, At2g19070, At2g38670, At3g25570, At3g55870, At5g38530, BIG, CYP83B1, F27K19_50, NAS1, NAS2, NAS3, NAS4, Q8GW86, SAMDC1, SAMDC2, SPDSYN1, SPDSYN2, TSB1]"/>
    <att type="string" name="Associated Genes Found0" value="[AT4G27070, AT5G05730, AT5G53120]"/>
    <att type="string" name="GOGroups0" value="[Group11, Group2]"/>
    <att type="string" name="GOID0" value="GO:0042401"/>
    <att type="string" name="GOLevels0" value="[5, 6]"/>
    <att type="string" name="GOTerm0" value="cellular biogenic amine biosynthetic process"/>
    <att type="string" name="Group PValue Corrected with Bonferroni0" value="{Group11=1.5686285002411636E-22, Group2=2.667419925045739E-10}"/>
    <att type="string" name="Group PValue0" value="{Group11=9.227226472006844E-24, Group2=1.5690705441445522E-11}"/>
    <att type="integer" name="Nr. Genes0" value="3"/>
    <att type="string" name="Ontology Source0" value="GO_BiologicalProcess_05.05.2011_16h22"/>
    <att type="string" name="OverViewTerm0" value="FALSE"/>
    <att type="real" name="Term PValue Corrected with Bonferroni0" value="1.0"/>
    <att type="real" name="Term PValue0" value="0.015964824581889945"/>
    <att type="string" name="canonicalName" value="GO:00424010"/>
    <graphics type="ELLIPSE" h="30.0" w="30.0" x="460.0" y="934.0" fill="#02068d" width="1" outline="#000000"/>
  </node>
  <node label="GO:00423430" id="-147">
    <att type="real" name="% Associated Genes0" value="16.66666603088379"/>
    <att type="string" name="All Associated Genes0" value="[ABCG36, AT1G18570, AT4G37430, AT5G44070, ATR1, At1g21100, At1g21120, At4g37400, BGLU26, CYP83B1, F6G170, cyp81F2]"/>
    <att type="string" name="Associated Genes Found0" value="[AT1G18570, AT5G44070]"/>
    <att type="string" name="GOGroups0" value="[Group11, Group12]"/>
    <att type="string" name="GOID0" value="GO:0042343"/>
    <att type="string" name="GOLevels0" value="[5, 7, 8, 9]"/>
    <att type="string" name="GOTerm0" value="indole glucosinolate metabolic process"/>
    <att type="string" name="Group PValue Corrected with Bonferroni0" value="{Group11=1.5686285002411636E-22, Group12=0.17002625782107086}"/>
    <att type="string" name="Group PValue0" value="{Group11=9.227226472006844E-24, Group12=0.010001544577710051}"/>
    <att type="integer" name="Nr. Genes0" value="2"/>
    <att type="string" name="Ontology Source0" value="GO_BiologicalProcess_05.05.2011_16h22"/>
    <att type="string" name="OverViewTerm0" value="FALSE"/>
    <att type="real" name="Term PValue Corrected with Bonferroni0" value="1.0"/>
    <att type="real" name="Term PValue0" value="0.011177800074800352"/>
    <att type="string" name="canonicalName" value="GO:00423430"/>
    <graphics type="ELLIPSE" h="30.0" w="30.0" x="667.0" y="1352.0" fill="#02068d" width="1" outline="#000000"/>
  </node>
  <node label="GO:00421800" id="-146">
    <att type="real" name="% Associated Genes0" value="4.294478416442871"/>
    <att type="string" name="All Associated Genes0" value="[20ox1, 20ox2, 20ox3, 4CLL5, 4CLL7, 4CLL9, A0MF23, ACC2, ACL1, ACO3, ACP-1, AK2, AK3, AKHSDH1, AKHSDH2, ALAAT1, AMPBP7, ARD1, ARD2, ARD3, AT1G01480, AT1G01610, AT1G02205, AT1G02860, AT1G03000, AT1G04580, AT1G04640, AT1G05160, AT1G05560, AT1G06080, AT1G06290, AT1G06570, AT1G07720, AT1G08250, AT1G08630, AT1G09620, AT1G10070, AT1G11790, AT1G13280, AT1G14520, AT1G14610, AT1G15045, AT1G15550, AT1G16540, AT1G17745, AT1G18270, AT1G18870, AT1G19640, AT1G22640, AT1G25220, AT1G25350, AT1G27140, AT1G29410, AT1G30100, AT1G30520, AT1G49430, AT1G50200, AT1G51500, AT1G52340, AT1G53000, AT1G55020, AT1G55920, AT1G60600, AT1G62180, AT1G62380, AT1G62800, AT1G62960, AT1G65960, AT1G66860, AT1G72970, AT1G73250, AT1G74710, AT1G76690, AT1G78390, AT1G78660, AT1G78680, AT1G79440, AT1G79810, AT1G80340, AT2G02390, AT2G11810, AT2G14750, AT2G15090, AT2G16370, AT2G16500, AT2G18790, AT2G18950, AT2G19590, AT2G19800, AT2G22330, AT2G22810, AT2G26310, AT2G26350, AT2G27150, AT2G27820, AT2G28630, AT2G29690, AT2G29980, AT2G30920, AT2G31360, AT2G31810, AT2G32440, AT2G37550, AT2G38110, AT2G39800, AT2G43090, AT2G43360, AT2G44160, AT2G44810, AT2G45690, AT3G01120, AT3G02580, AT3G04520, AT3G07560, AT3G07630, AT3G09920, AT3G11430, AT3G14440, AT3G15850, AT3G19710, AT3G23940, AT3G24220, AT3G25760, AT3G25770, AT3G25780, AT3G25900, AT3G29200, AT3G44720, AT3G47340, AT3G49700, AT3G51840, AT3G52200, AT3G54010, AT3G59970, AT3G63250, AT3g04520/T27C4_17, AT4G00360, AT4G00400, AT4G02780, AT4G04610, AT4G08040, AT4G11280, AT4G14720, AT4G14850, AT4G14910, AT4G15090, AT4G16760, AT4G18350, AT4G21990, AT4G22753, AT4G26200, AT4G26260, AT4G26483, AT4G26850, AT4G27070, AT4G28680, AT4G29010, AT4G31180, AT4G31990, AT4G33950, AT4G34510, AT4G34570, AT4G34710, AT4G35260, AT4G36220, AT4G37770, AT4G38220, AT4G39030, AT4G39280, AT4G39660, AT4G39940, AT4G39950, AT4G39980, AT4g11640, AT4g13050, AT4g26300, AT4g34200, AT5G03730, AT5G04230, AT5G05590, AT5G05730, AT5G05920, AT5G07440, AT5G10160, AT5G10240, AT5G10480, AT5G10880, AT5G10920, AT5G11520, AT5G12320, AT5G13280, AT5G13520, AT5G13790, AT5G15530, AT5G16715, AT5G19550, AT5G20410, AT5G20960, AT5G22630, AT5G23020, AT5G23190, AT5G25760, AT5G27380, AT5G36880, AT5G37300, AT5G37830, AT5G42650, AT5G43850, AT5G46240, AT5G46290, AT5G47120, AT5G48150, AT5G48220, AT5G49030, AT5G49070, AT5G51690, AT5G54080, AT5G55120, AT5G56640, AT5G57800, AT5G60540, AT5G62530, AT5G64813, AT5G65010, AT5G65110, AT5G65800, AT5G66230, ATNADP-ME2, ATPLDDELTA, ATR1, ATS1, ATSERAT1, ATSERAT2, A_TM021B04, At SPS, At-SPS2, At1g01280, At1g01600, At1g02205, At1g02400, At1g04410, At1g06090, At1g06100, At1g06120, At1g06350, At1g06360, At1g07420, At1g07780, At1g08510/T27G79, At1g08630, At1g08980, At1g09795/F21M129, At1g10060, At1g10070, At1g10670, At1g11870, At1g12050, At1g13950, At1g14290, At1g14810, At1g17745, At1g17960, At1g18130, At1g18270, At1g19140, At1g22020, At1g22410, At1g24360, At1g25155, At1g25220, At1g26630, At1g27160, At1g27980, At1g28120, At1g29410, At1g29870, At1g30120, At1g31860, At1g32440, At1g32470, At1g33320, At1g35580, At1g36370, At1g44090, At1g44820, At1g47578, At1g47990, At1g51720, At1g53240, At1g53520, At1g54220, At1g57750, At1g60990, At1g61850, At1g62640, At1g63660, At1g63710, At1g64660/F1N193, At1g65290, At1g65520, At1g65930, At1g65960, At1g66200, At1g66530, At1g67070, At1g67080, At1g67730, At1g68320, At1g68420, At1g69370/F23O10_5, At1g69410, At1g69640, At1g69920, At1g72550, At1g73680, At1g74260, At1g75980, At1g78660, At1g78670, At1g79750, At1g79900, At1g80330, At1g80555, At2g02000/F14H20, At2g02010, At2g02380, At2g03667, At2g03690, At2g04240, At2g04400, At2g04842, At2g05830, At2g05990, At2g13560, At2g14060, At2g17265, At2g17630, At2g19900/F6F22, At2g19940, At2g21550, At2g21940, At2g22230, At2g22780, At2g22910, At2g23560, At2g23580, At2g23600, At2g23620, At2g24850, At2g25840, At2g26310, At2g26310/T1D16, At2g26560/T9J223, At2g28880, At2g29390, At2g30200, At2g30650, At2g30660, At2g31170, At2g31810, At2g33380/F4P95, At2g33840, At2g35080, At2g35120, At2g37250, At2g37500, At2g37700, At2g43080, At2g43400, At2g44620, At2g45300, At2g46110, At2g46210, At3g01420/T13O15, At3g02660, At3g02760, At3g03480, At3g03630, At3g04600, At3g05290, At3g06300, At3g10030, At3g10870, At3g11710, At3g12990, At3g13490, At3g13930, At3g15020, At3g15290, At3g16565, At3g16950, At3g17720, At3g17760, At3g18680, At3g19480, At3g21780, At3g22200, At3g22425, At3g22460, At3g23940, At3g24170, At3g24200, At3g25110, At3g25530, At3g27740, At3g30770, At3g45770, At3g47520, At3g49680, At3g53180/T4D210, At3g55400, At3g55610, At3g55870, At3g57050, At3g58140, At3g58180, At3g58610, At4g00570, At4g04320, At4g08870, At4g08900, At4g12110, At4g12130, At4g13780, At4g14710, At4g14910, At4g20930, At4g22753, At4g22756, At4g23590, At4g24670, At4g24830, At4g26870, At4g26900, At4g28420, At4g28680, At4g29210, At4g30550, At4g31990, At4g32520, At4g33010, At4g33510, At4g33760/T16L1_250, At4g35630, At4g38220, At4g39280, At4g39540/F23K16_170, At4g39640, At4g39650, At5g04620, At5g05270, At5g07010, At5g07440, At5g09660, At5g10330, At5g14590, At5g16290, At5g20980, At5g21060, At5g25880, At5g26780, At5g27470, At5g27520, At5g28840, At5g36160, At5g38020, At5g38200, At5g38530, At5g38830, At5g42890, At5g43280, At5g43330, At5g46180, At5g47630, At5g48220, At5g48840, At5g49030, At5g50210, At5g50950, At5g52520, At5g52570, At5g52920, At5g53850, At5g53970, At5g55240, At5g56720, At5g57590, At5g57850, At5g57890, At5g58330, At5g60600, At5g61780, At5g63910, At5g64050, At5g65010, At5g66120, At5g67030, At5g67160, AtATP-PRT1, AtHDC, AtcysD2, BCAT1, BCAT2, BCAT3, BCAT5, BCAT6, BCAT7, BGLU18, BIG, C7A1010, CAC1, CAC2, CAC3, CARB, CER1-like, CHI1, CHI2, CHY1, CIMS, CLA1, CM2, COQ5, CSR 1, CTIMC, CYP20-3, CYP707A1, CYP707A2, CYP707A3, CYP83B1, CYP86A1, CYP86A8, Cyt ACS 1, DAP, DAPB1, DAPB2, DAPB3, DAPF, DCR, DGL, DHDPS1, DHDPS2, DHS2, DXR, ECH2, ELI5, EMB1144, EMB86, ETFB, F10M1020, F10M2310, F10M2370, F11M157, F12E4_150, F12F1, F12F19, F12M12_70, F13M2390, F16M2_20, F18A580, F18K105, F18O21_260, F19F1860, F20O900, F21E102, F24G2420, F27K19_50, F28J1220, F28J1230, F2A1930, F2J10, F3O94, F4F7, F5K20_210, F6I180, F8F6_70, F9D160, FAB1, FAD2, FAD6, FAD7, FAD8, FAR3, FAR4, FAR5, FLU, FOLB1, FUM1, FUM2, GA2, GA2OX7, GAD, GALAK, GCN2, GCR1, GDCSH, GDCSP, GDCST, GDH1, GDH2, GGH, GH32, GLN1-1, GLN1-2, GLN1-3, GLN1-4, GLN1-5, GLT1, GLU1, GLU2, GLYRS-1, GLYRS-2, GP ALPHA 1, GR, GS2, GSH3, HDF7, HDH, HHT1, HIS6, HMT3, HPA2, ICDH, ICL, IDH5, IDH6, IIL1, IMDH1, IMDH2, IMDH3, IMPL2, IMS1, IPMS1, ISPD, JAR1, KAS, KAS1, KAT5, KCS1, KCS10, KCS11, KCS13, KCS14, KCS16, KCS18, KCS19, KCS2, KCS20, KCS21, KCS4, KCS5, KCS6, KCS7, KCS9, KIN10, KIN11, KINB1, KINB2, KING1, KO1, L73G190, LACS1, LACS3, LACS4, LACS5, LACS6, LACS7, LACS8, LACS9, LIP2p, LOX2, LOX3, LOX4, LOX5, LOX6, LTA2, LYSA1, LYSA2, MAM1, MAM2, MCCA, MCCB, MEE32, MENB, MENG, METK3, METK4, MFP2, MMT1, MTK, MTN1, MTN2, MTO1, NAGK, NAS1, NAS2, NAS3, NAS4, NFS2, NFXL1, NIFS, NIT1, NIT2, NP_001078324, NP_001154311, NP_001154640, NP_194570, NS2, OASA1, OASB, OASC, OMR1, OPR1, OPR3, OTC, P5CSA, P5CSB, PAL1, PAL2, PAL3, PAL4, PAT, PDX13, PED1, PEX1, PEX12, PHYLLO, PLDALPHA1, PMM, POX1, POX2, PPT1, PROC1, PSP, PYRB, Q41907, Q42021, Q8LAA9, Q8LAP2, Q8LF92, Q93Z97, Q94A74, Q94AA6, Q9LG24, Q9LJT0, Q9LJT1, Q9LJT5, Q9LM23, Q9LMB3, Q9LPP9, Q9LQR9, Q9LQU9, Q9LQY8, Q9LRM9, Q9MA03, Q9SGN2, Q9SKV1, RML1, RTY/SUR1, S-ACP-DES1, S-ACP-DES2, S-ACP-DES3, S-ACP-DES4, S-ACP-DES5, S-ACP-DES6, SAM1, SAM2, SAT2, SAT4, SDH, SGT1, SHM1, SMO, SSI2, SYNC1, SYNC3, SYNO, T13K140, T16L150, T16L160, T17J13, T18F153, T19B17, T1E22_60, T1J1, T22E16, T24P22, T28A8_90, T31P16_230, T32N15, T4D210, T9J141, TAA1, THRRS, TS1, TS2, TSB1, TYRAAT1, TYRAAT2, UROS, USP, VDE1, VTC4, VTE1, WIN1, Z973356, accD, atms2, cer2, cyt1, dl3005c, dl3255c, dl3260c, hsr1, oas5, sld1]"/>
    <att type="string" name="Associated Genes Found0" value="[AT1G02205, AT1G07720, AT1G10070, AT1G17745, AT1G30520, AT1G51500, AT1G62380, AT2G02390, AT2G22330, AT3G15850, AT3G25780, AT3G44720, AT3G47340, AT3G51840, AT3G59970, AT4G00400, AT4G11280, AT4G16760, AT4G21990, AT4G27070, AT4G39950, AT4G39980, AT5G05730, AT5G07440, AT5G10160, AT5G10240, AT5G10480, AT5G16715, AT5G20960, AT5G36880, AT5G46240, AT5G48220, AT5G54080, AT5G65010, AT5G65110]"/>
    <att type="string" name="GOGroups0" value="[Group11, Group2]"/>
    <att type="string" name="GOID0" value="GO:0042180"/>
    <att type="string" name="GOLevels0" value="[3]"/>
    <att type="string" name="GOTerm0" value="cellular ketone metabolic process"/>
    <att type="string" name="Group PValue Corrected with Bonferroni0" value="{Group11=1.5686285002411636E-22, Group2=2.667419925045739E-10}"/>
    <att type="string" name="Group PValue0" value="{Group11=9.227226472006844E-24, Group2=1.5690705441445522E-11}"/>
    <att type="integer" name="Nr. Genes0" value="35"/>
    <att type="string" name="Ontology Source0" value="GO_BiologicalProcess_05.05.2011_16h22"/>
    <att type="string" name="OverViewTerm0" value="TRUE"/>
    <att type="real" name="Term PValue Corrected with Bonferroni0" value="2.4253294740018123E-7"/>
    <att type="real" name="Term PValue0" value="1.627737902014639E-9"/>
    <att type="string" name="canonicalName" value="GO:00421800"/>
    <graphics type="ELLIPSE" h="50.0" w="50.0" x="453.09197998046875" y="774.53125" fill="#02068d" width="1" outline="#000000"/>
  </node>
  <node label="GO:00347540" id="-145">
    <att type="real" name="% Associated Genes0" value="4.651162624359131"/>
    <att type="string" name="All Associated Genes0" value="[AT1G66340, AT1G75450, AT2G19500, AT2G22330, AT2G41510, AT3G63440, AT4G39950, AT5G08150, AT5G14420, AT5G21482, AT5G56970, At1g08980, At1g26210, At1g68870, At3g10870, At4g24670, CKX4, CYP83B1, IPT1, IPT2, IPT3, IPT4, IPT5, IPT6, IPT7, IPT8, IPT9, LOG1, LOG2, LOG3, LOG4, LOG5, LOG6, LOG7, LOG8, LOG9, NIT1, NIT2, RGLG1, RTY/SUR1, SHM1, TAA1, TSB1]"/>
    <att type="string" name="Associated Genes Found0" value="[AT2G22330, AT4G39950]"/>
    <att type="string" name="GOGroups0" value="[Group11]"/>
    <att type="string" name="GOID0" value="GO:0034754"/>
    <att type="string" name="GOLevels0" value="[3, 5]"/>
    <att type="string" name="GOTerm0" value="cellular hormone metabolic process"/>
    <att type="string" name="Group PValue Corrected with Bonferroni0" value="{Group11=1.5686285002411636E-22}"/>
    <att type="string" name="Group PValue0" value="{Group11=9.227226472006844E-24}"/>
    <att type="integer" name="Nr. Genes0" value="2"/>
    <att type="string" name="Ontology Source0" value="GO_BiologicalProcess_05.05.2011_16h22"/>
    <att type="string" name="OverViewTerm0" value="FALSE"/>
    <att type="real" name="Term PValue Corrected with Bonferroni0" value="1.0"/>
    <att type="real" name="Term PValue0" value="0.11640474762815994"/>
    <att type="string" name="canonicalName" value="GO:00347540"/>
    <graphics type="ELLIPSE" h="30.000244140625" w="30.0" x="770.6005859375" y="1084.5537109375" fill="#02068d" width="1" outline="#000000"/>
  </node>
  <node label="GO:00346370" id="-144">
    <att type="real" name="% Associated Genes0" value="5.263157844543457"/>
    <att type="string" name="All Associated Genes0" value="[AT1G02730, AT1G05570, AT1G06410, AT1G11720, AT1G16400, AT1G16410, AT1G16980, AT1G17000, AT1G18570, AT1G19300, AT1G23870, AT1G24100, AT1G25210, AT1G27680, AT1G30620, AT1G53000, AT1G53500, AT1G68020, AT1G73250, AT1G76890, AT1G78240, AT1G78570, AT1G78580, AT2G13680, AT2G20370, AT2G22330, AT2G24210, AT2G28110, AT2G37090, AT3G08550, AT3G09710, AT3G14570, AT3G14790, AT3G19710, AT3G20480, AT3G25140, AT3G52340, AT3G61130, AT4G13770, AT4G17770, AT4G27550, AT4G38190, AT4G39210, AT4g12430, AT4g22590, AT4g39770, AT5G05260, AT5G10100, AT5G10160, AT5G19220, AT5G23020, AT5G24810, AT5G33290, AT5G48300, AT5G54690, AT5g24810;F6A40, ATCSLD1, ATCSLD6, ATCSLE1, ATCSLG1, ATCSLG2, ATCSLG3, ATGH9A1, ATR1, ATTPS11, ATTPS8, At1g10670, At1g13440, At1g24793, At1g25054, At1g35910, At1g43620, At1g43670, At1g64440, At1g65880, At1g71100, At1g73740/F25P226, At1g78090, At2g04560, At2g21590, At2g22190, At2g22230, At2g22240, At2g32700, At2g35100, At2g35610, At2g40690, At3g01180/T4P133, At3g02230, At3g07020, At3g20480, At3g55800, At4g00560, At4g18240, At4g24620, At4g39770/T19P19_160, At4g39800, At5g01360, At5g06700, At5g10170, At5g16510, At5g24300, At5g51460, At5g63840, At5g65140, At5g65690, At5g66680, At5g67210, AtTPPA, B3GALT15, CALS1, CALS10, CALS11, CALS12, CALS2, CALS3, CALS4, CALS6, CALS7, CALS8, CALS9, CESA1, CESA10, CESA2, CESA4, CESA5, CESA6, CESA9, CEV1, CSLB1, CSLB2, CSLB3, CSLB4, CSLB5, CSLB6, CSLD2, CSLD3, CTIMC, CYP83B1, F11C1_60, F16L1, F3F20, F3O94, F6N237, F8H, FMOGS-OX1, FMOGS-OX2, FMOGS-OX3, FMOGS-OX4, FMOGS-OX5, FUT1, FUT13, GAPC, GSL-OH, HHT1, IIL1, IMDH3, IRX1, IRX10, IRX10L, IRX14, IRX14H, IRX3, IRX9H, ISA1, ISA2, KDSA, MAM1, MUR1, NP_001154712, NP_173888, NP_196804, NRS/ER, PCKA, PGIC, PGMP, PGSIP1, PIGM, PMM, PU1, Q42189, Q500V1, Q9FJQ1, Q9LMZ6, Q9LQH8, QQS, RGP2, RGP4, RML1, RTY/SUR1, SBE2, SOT16, SOT17, SOT18, SPP1, SPP3A, SPP3B, SSIII, Sbe2, T15B16, T16O116, T21B142, T4I9, T9A210, VTC4, WAXY, XXT1, cyp81F2, cyt1]"/>
    <att type="string" name="Associated Genes Found0" value="[AT1G05570, AT1G16410, AT1G18570, AT1G19300, AT1G23870, AT1G78580, AT2G22330, AT4G17770, AT5G10160, AT5G19220, AT5G33290]"/>
    <att type="string" name="GOGroups0" value="[Group11, Group3]"/>
    <att type="string" name="GOID0" value="GO:0034637"/>
    <att type="string" name="GOLevels0" value="[4, 5]"/>
    <att type="string" name="GOTerm0" value="cellular carbohydrate biosynthetic process"/>
    <att type="string" name="Group PValue Corrected with Bonferroni0" value="{Group11=1.5686285002411636E-22, Group3=1.4156565253701234E-4}"/>
    <att type="string" name="Group PValue0" value="{Group11=9.227226472006844E-24, Group3=8.327391325706609E-6}"/>
    <att type="integer" name="Nr. Genes0" value="11"/>
    <att type="string" name="Ontology Source0" value="GO_BiologicalProcess_05.05.2011_16h22"/>
    <att type="string" name="OverViewTerm0" value="TRUE"/>
    <att type="real" name="Term PValue Corrected with Bonferroni0" value="0.021482379484394513"/>
    <att type="real" name="Term PValue0" value="1.4417704351942626E-4"/>
    <att type="string" name="canonicalName" value="GO:00346370"/>
    <graphics type="ELLIPSE" h="50.00048828125" w="50.0" x="603.0" y="1476.0" fill="#02068d" width="1" outline="#000000"/>
  </node>
  <node label="GO:00344400" id="-143">
    <att type="real" name="% Associated Genes0" value="15.789473533630371"/>
    <att type="string" name="All Associated Genes0" value="[AT1G03000, AT1G06290, AT1G72970, AT1G79810, AT2G26350, AT3G07560, AT3G51840, AT4G16760, AT5G25760, AT5G65110, At3g01420/T13O15, At3g05290, At5g27520, At5g42890, ECH2, MFP2, PED1, PEX1, PEX12]"/>
    <att type="string" name="Associated Genes Found0" value="[AT3G51840, AT4G16760, AT5G65110]"/>
    <att type="string" name="GOGroups0" value="[Group11, Group2]"/>
    <att type="string" name="GOID0" value="GO:0034440"/>
    <att type="string" name="GOLevels0" value="[3, 5, 6]"/>
    <att type="string" name="GOTerm0" value="lipid oxidation"/>
    <att type="string" name="Group PValue Corrected with Bonferroni0" value="{Group11=1.5686285002411636E-22, Group2=2.667419925045739E-10}"/>
    <att type="string" name="Group PValue0" value="{Group11=9.227226472006844E-24, Group2=1.5690705441445522E-11}"/>
    <att type="integer" name="Nr. Genes0" value="3"/>
    <att type="string" name="Ontology Source0" value="GO_BiologicalProcess_05.05.2011_16h22"/>
    <att type="string" name="OverViewTerm0" value="FALSE"/>
    <att type="real" name="Term PValue Corrected with Bonferroni0" value="0.3079614602568286"/>
    <att type="real" name="Term PValue0" value="0.0020668554379652923"/>
    <att type="string" name="canonicalName" value="GO:00344400"/>
    <graphics type="ELLIPSE" h="30.0" w="30.0" x="635.0" y="625.0" fill="#02068d" width="1" outline="#000000"/>
  </node>
  <node label="GO:00342840" id="-142">
    <att type="real" name="% Associated Genes0" value="6.896551609039307"/>
    <att type="string" name="All Associated Genes0" value="[AT1G31930, AT1G45249, AT1G52340, AT1G72320, AT1G76030, AT2G19450, AT2G19860, AT2G40220, AT3G08550, AT3G47340, AT4G15900, AT4G34390, AT5G03730, AT5G57090, AT5G64750, At1g20950/F9H16, At1g43670, At1g74670, At2g28900, At3g26090, At5g41670, C7A1040, CIPK8, GATA21, GP ALPHA 1, GPT2, HXK1, RPT5B, XLG]"/>
    <att type="string" name="Associated Genes Found0" value="[AT2G19860, AT3G47340]"/>
    <att type="string" name="GOGroups0" value="[Group1, Group11, Group13, Group3, Group4]"/>
    <att type="string" name="GOID0" value="GO:0034284"/>
    <att type="string" name="GOLevels0" value="[5]"/>
    <att type="string" name="GOTerm0" value="response to monosaccharide stimulus"/>
    <att type="string" name="Group PValue Corrected with Bonferroni0" value="{Group1=0.11288642812032629, Group11=1.5686285002411636E-22, Group13=8.207728626942202E-5, Group3=1.4156565253701234E-4, Group4=0.0036532098882545404}"/>
    <att type="string" name="Group PValue0" value="{Group1=0.0066403781247250755, Group11=9.227226472006844E-24, Group13=4.828075662907178E-6, Group3=8.327391325706609E-6, Group4=2.1489469930909062E-4}"/>
    <att type="integer" name="Nr. Genes0" value="2"/>
    <att type="string" name="Ontology Source0" value="GO_BiologicalProcess_05.05.2011_16h22"/>
    <att type="string" name="OverViewTerm0" value="FALSE"/>
    <att type="real" name="Term PValue Corrected with Bonferroni0" value="1.0"/>
    <att type="real" name="Term PValue0" value="0.05912866743905815"/>
    <att type="string" name="canonicalName" value="GO:00342840"/>
    <graphics type="ELLIPSE" h="30.0" w="30.000091552734375" x="176.01568603515625" y="1115.462646484375" fill="#1cf83d" width="1" outline="#000000"/>
  </node>
  <node label="GO:00340500" id="-141">
    <att type="real" name="% Associated Genes0" value="4.761904716491699"/>
    <att type="string" name="All Associated Genes0" value="[AT1G02860, AT1G12220, AT1G33560, AT1G51660, AT2G43790, AT3G20600, AT3G21220, AT3G45640, AT3G48090, AT4G12720, AT5G06950, AT5G51700, AT5G54250, ATHCHIB, ATPAP1, At1g26630, At1g28380, At1g71220, At2g20310, At2g26560/T9J223, At4g02640, At4g20380, At4g36290, CPR30, CRK13, CRT3, CYP18-3, DND1, EFR, FMO1, HSR2, RIN4, RPH8A, RPM1, RPP13, RPP8, RPS2, RPS4, SHM1, T19K24, TGA3, TTR1]"/>
    <att type="string" name="Associated Genes Found0" value="[AT1G12220, AT3G45640]"/>
    <att type="string" name="GOGroups0" value="[Group17]"/>
    <att type="string" name="GOID0" value="GO:0034050"/>
    <att type="string" name="GOLevels0" value="[4]"/>
    <att type="string" name="GOTerm0" value="host programmed cell death induced by symbiont"/>
    <att type="string" name="Group PValue Corrected with Bonferroni0" value="{Group17=0.0032000058459379366}"/>
    <att type="string" name="Group PValue0" value="{Group17=1.8823563799634922E-4}"/>
    <att type="integer" name="Nr. Genes0" value="2"/>
    <att type="string" name="Ontology Source0" value="GO_BiologicalProcess_05.05.2011_16h22"/>
    <att type="string" name="OverViewTerm0" value="FALSE"/>
    <att type="real" name="Term PValue Corrected with Bonferroni0" value="1.0"/>
    <att type="real" name="Term PValue0" value="0.11195435538772656"/>
    <att type="string" name="canonicalName" value="GO:00340500"/>
    <graphics type="ELLIPSE" h="30.0" w="30.0" x="1394.557373046875" y="824.4584350585938" fill="#7774fd" width="1" outline="#000000"/>
  </node>
  <node label="GO:00339930" id="-140">
    <att type="real" name="% Associated Genes0" value="50.0"/>
    <att type="string" name="All Associated Genes0" value="[AT1G05010, AT1G62380, AT2G19590, At1g12010]"/>
    <att type="string" name="Associated Genes Found0" value="[AT1G05010, AT1G62380]"/>
    <att type="string" name="GOGroups0" value="[Group8]"/>
    <att type="string" name="GOID0" value="GO:0033993"/>
    <att type="string" name="GOLevels0" value="[4]"/>
    <att type="string" name="GOTerm0" value="response to lipid"/>
    <att type="string" name="Group PValue Corrected with Bonferroni0" value="{Group8=1.9149650656212817E-4}"/>
    <att type="string" name="Group PValue0" value="{Group8=1.126450038600754E-5}"/>
    <att type="integer" name="Nr. Genes0" value="2"/>
    <att type="string" name="Ontology Source0" value="GO_BiologicalProcess_05.05.2011_16h22"/>
    <att type="string" name="OverViewTerm0" value="TRUE"/>
    <att type="real" name="Term PValue Corrected with Bonferroni0" value="0.16271798494051143"/>
    <att type="real" name="Term PValue0" value="0.0010920670130235666"/>
    <att type="string" name="canonicalName" value="GO:00339930"/>
    <graphics type="ELLIPSE" h="30.0" w="30.0" x="1765.0" y="1286.0" fill="#8bac27" width="1" outline="#000000"/>
  </node>
  <node label="GO:00330370" id="-139">
    <att type="real" name="% Associated Genes0" value="15.384614944458008"/>
    <att type="string" name="All Associated Genes0" value="[ABCG36, ANN2, AT1G18570, AT1G24100, AT1G66340, AT2G22330, AT4G26850, AT4G39950, AT5G44070, ATRBOH F, At1g28380, At1g73370, At3g03250, At5g17310, At5g37180, At5g61130, BGLU26, CALS12, CALS7, CALS9, CYP83B1, EIN2, FLS2, RML1, TSA1, cyp81F2]"/>
    <att type="string" name="Associated Genes Found0" value="[AT1G18570, AT2G22330, AT4G39950, AT5G44070]"/>
    <att type="string" name="GOGroups0" value="[Group11]"/>
    <att type="string" name="GOID0" value="GO:0033037"/>
    <att type="string" name="GOLevels0" value="[3]"/>
    <att type="string" name="GOTerm0" value="polysaccharide localization"/>
    <att type="string" name="Group PValue Corrected with Bonferroni0" value="{Group11=1.5686285002411636E-22}"/>
    <att type="string" name="Group PValue0" value="{Group11=9.227226472006844E-24}"/>
    <att type="integer" name="Nr. Genes0" value="4"/>
    <att type="string" name="Ontology Source0" value="GO_BiologicalProcess_05.05.2011_16h22"/>
    <att type="string" name="OverViewTerm0" value="FALSE"/>
    <att type="real" name="Term PValue Corrected with Bonferroni0" value="0.0594027387175322"/>
    <att type="real" name="Term PValue0" value="3.9867609877538386E-4"/>
    <att type="string" name="canonicalName" value="GO:00330370"/>
    <graphics type="ELLIPSE" h="50.0" w="50.0" x="868.5537109375" y="1202.107421875" fill="#02068d" width="1" outline="#000000"/>
  </node>
  <node label="GO:00330150" id="-138">
    <att type="real" name="% Associated Genes0" value="11.11111068725586"/>
    <att type="string" name="All Associated Genes0" value="[AT2G26550, AT3G44880, AT4G37000, AT5G13800, At1g58300, At1g69720, At2g26670, CLH1, CLH2, ETFB, F7H1900, HO3, NOL, NP_180223, NYC1, PHO2, PPD, TED4]"/>
    <att type="string" name="Associated Genes Found0" value="[AT3G44880, AT5G13800]"/>
    <att type="string" name="GOGroups0" value="[Group11, Group17, Group8]"/>
    <att type="string" name="GOID0" value="GO:0033015"/>
    <att type="string" name="GOLevels0" value="[4, 5]"/>
    <att type="string" name="GOTerm0" value="tetrapyrrole catabolic process"/>
    <att type="string" name="Group PValue Corrected with Bonferroni0" value="{Group11=1.5686285002411636E-22, Group17=0.0032000058459379366, Group8=1.9149650656212817E-4}"/>
    <att type="string" name="Group PValue0" value="{Group11=9.227226472006844E-24, Group17=1.8823563799634922E-4, Group8=1.126450038600754E-5}"/>
    <att type="integer" name="Nr. Genes0" value="2"/>
    <att type="string" name="Ontology Source0" value="GO_BiologicalProcess_05.05.2011_16h22"/>
    <att type="string" name="OverViewTerm0" value="FALSE"/>
    <att type="real" name="Term PValue Corrected with Bonferroni0" value="1.0"/>
    <att type="real" name="Term PValue0" value="0.02455977535165873"/>
    <att type="string" name="canonicalName" value="GO:00330150"/>
    <graphics type="ELLIPSE" h="30.0" w="30.0" x="1261.0" y="1167.0" fill="#02068d" width="1" outline="#000000"/>
  </node>
  <node label="GO:00327870" id="-137">
    <att type="real" name="% Associated Genes0" value="5.607476711273193"/>
    <att type="string" name="All Associated Genes0" value="[20ox1, 20ox2, 20ox3, 4CLL5, 4CLL7, 4CLL9, A0MF23, ACC2, ACL1, ACO3, ACP-1, AMPBP7, AT1G01480, AT1G01610, AT1G02205, AT1G02860, AT1G03000, AT1G04580, AT1G04640, AT1G05160, AT1G06080, AT1G06290, AT1G07720, AT1G13280, AT1G15550, AT1G16540, AT1G19640, AT1G22640, AT1G30100, AT1G49430, AT1G51500, AT1G52340, AT1G55020, AT1G62380, AT1G72970, AT1G74710, AT1G76690, AT1G78390, AT1G79810, AT1G80340, AT2G11810, AT2G15090, AT2G18790, AT2G18950, AT2G22330, AT2G22810, AT2G26350, AT2G27150, AT2G28630, AT2G29980, AT2G31360, AT2G32440, AT2G38110, AT2G43360, AT2G44810, AT2G45690, AT3G02580, AT3G07560, AT3G11430, AT3G14440, AT3G15850, AT3G24220, AT3G25760, AT3G25770, AT3G25780, AT3G49700, AT3G51840, AT3G52200, AT3G54010, AT4G00360, AT4G00400, AT4G02780, AT4G08040, AT4G11280, AT4G14850, AT4G15090, AT4G16760, AT4G18350, AT4G22753, AT4G26200, AT4G29010, AT4G33950, AT4G34510, AT4G36220, AT4G37770, AT4G39030, AT4G39950, AT4g13050, AT5G03730, AT5G10160, AT5G10480, AT5G13520, AT5G13790, AT5G15530, AT5G20410, AT5G20960, AT5G23190, AT5G25760, AT5G36880, AT5G37300, AT5G42650, AT5G46240, AT5G46290, AT5G47120, AT5G49070, AT5G57800, AT5G64813, AT5G65110, AT5G65800, ATS1, A_TM021B04, At1g01280, At1g01600, At1g02205, At1g02400, At1g06090, At1g06100, At1g06120, At1g06350, At1g06360, At1g07420, At1g08510/T27G79, At1g08980, At1g10670, At1g14290, At1g24360, At1g30120, At1g32440, At1g44090, At1g47578, At1g47990, At1g54220, At1g57750, At1g61850, At1g62640, At1g63710, At1g65290, At1g65520, At1g67080, At1g67730, At1g68320, At1g69640, At1g73680, At1g79750, At1g80330, At2g04240, At2g05990, At2g14060, At2g21940, At2g22230, At2g22780, At2g23560, At2g23580, At2g23600, At2g23620, At2g26560/T9J223, At2g29390, At2g30200, At2g33380/F4P95, At2g37700, At2g43080, At2g44620, At2g46210, At3g01420/T13O15, At3g03480, At3g05290, At3g06300, At3g10870, At3g12990, At3g13930, At3g15290, At3g16950, At3g21780, At3g25110, At3g45770, At4g04320, At4g12110, At4g22753, At4g22756, At4g24670, At4g39540/F23K16_170, At5g04620, At5g07010, At5g09660, At5g27520, At5g38020, At5g42890, At5g43280, At5g47630, At5g52570, At5g52920, At5g55240, At5g57590, At5g60600, At5g61780, At5g67030, At5g67160, BGLU18, C7A1010, CAC1, CAC2, CAC3, CER1-like, CLA1, CTIMC, CYP707A1, CYP707A2, CYP707A3, CYP83B1, CYP86A1, CYP86A8, DCR, DGL, DXR, ECH2, F10M1020, F10M2370, F13M2390, F18K105, F6I180, F8F6_70, FAB1, FAD2, FAD6, FAD7, FAD8, FAR3, FAR4, FAR5, FLU, GA2, GA2OX7, GALAK, GH32, HDF7, HHT1, ICL, ISPD, JAR1, KAS, KAS1, KAT5, KCS1, KCS10, KCS11, KCS13, KCS14, KCS16, KCS18, KCS19, KCS2, KCS20, KCS21, KCS4, KCS5, KCS6, KCS7, KCS9, KIN10, KIN11, KINB1, KINB2, KING1, KO1, L73G190, LACS1, LACS3, LACS4, LACS5, LACS6, LACS7, LACS8, LACS9, LIP2p, LOX2, LOX3, LOX4, LOX5, LOX6, LTA2, MEE32, MFP2, NFXL1, NIT1, NIT2, OPR1, OPR3, PAL1, PED1, PEX1, PEX12, PLDALPHA1, Q9SKV1, RTY/SUR1, S-ACP-DES1, S-ACP-DES2, S-ACP-DES3, S-ACP-DES4, S-ACP-DES5, S-ACP-DES6, SGT1, SMO, SSI2, T13K140, T19B17, T1E22_60, T1J1, T22E16, TAA1, TSB1, USP, VDE1, VTE1, WIN1, Z973356, accD, cer2, dl3255c, dl3260c, hsr1, sld1]"/>
    <att type="string" name="Associated Genes Found0" value="[AT1G02205, AT1G07720, AT1G51500, AT1G62380, AT2G22330, AT3G15850, AT3G25780, AT3G51840, AT4G00400, AT4G11280, AT4G16760, AT4G39950, AT5G10160, AT5G10480, AT5G20960, AT5G36880, AT5G46240, AT5G65110]"/>
    <att type="string" name="GOGroups0" value="[Group11, Group2]"/>
    <att type="string" name="GOID0" value="GO:0032787"/>
    <att type="string" name="GOLevels0" value="[6]"/>
    <att type="string" name="GOTerm0" value="monocarboxylic acid metabolic process"/>
    <att type="string" name="Group PValue Corrected with Bonferroni0" value="{Group11=1.5686285002411636E-22, Group2=2.667419925045739E-10}"/>
    <att type="string" name="Group PValue0" value="{Group11=9.227226472006844E-24, Group2=1.5690705441445522E-11}"/>
    <att type="integer" name="Nr. Genes0" value="18"/>
    <att type="string" name="Ontology Source0" value="GO_BiologicalProcess_05.05.2011_16h22"/>
    <att type="string" name="OverViewTerm0" value="FALSE"/>
    <att type="real" name="Term PValue Corrected with Bonferroni0" value="6.76171232866026E-5"/>
    <att type="real" name="Term PValue0" value="4.538061965543799E-7"/>
    <att type="string" name="canonicalName" value="GO:00327870"/>
    <graphics type="ELLIPSE" h="50.0" w="50.0" x="470.0" y="607.0" fill="#02068d" width="1" outline="#000000"/>
  </node>
  <node label="GO:00316690" id="-136">
    <att type="real" name="% Associated Genes0" value="4.938271522521973"/>
    <att type="string" name="All Associated Genes0" value="[AT1G27320, AT1G43700, AT1G55920, AT2G11810, AT2G19590, AT2G33770, AT2G45170, AT3G04530, AT3G16785, AT3G23430, AT3G47340, AT3G62980, AT4G00550, AT4G03190, AT4G33030, AT4g04955, AT5G20410, AT5G60410, AT5G61420, ATG12A, ATG12B, ATL31, ATR1, At1g09020, At1g13300, At1g23010/F19G10_5, At1g54210, At1g68320, At2g21410, At2g22240, At3g03250, At3g03520, At3g08860, At3g09922, At3g18290, At3g27740, At3g55880, At3g61710, At4g39080, At5g07690, At5g21040, At5g23630, At5g26880, At5g42870, At5g45380, At5g48850, BGLU21, BHLH32, BHLH47, BOR4, CARB, CAT1, CAT2, CIPK9, F11F8_14, GTE10, KINB1, NIP5-1, NIP6-1, NIT3, PAP12, PCKA, PHF1, PHO1-H1, PHT1-1, PHT1-2, PLDEPSILON, PLDP2, PS2, PYD1A, PYD2, PYD3, PYRB, PYRE-F, SPX2, SPX3, SULTR1, T21P5, UPP, WOL, WRKY6]"/>
    <att type="string" name="Associated Genes Found0" value="[AT2G33770, AT2G45170, AT3G16785, AT3G47340]"/>
    <att type="string" name="GOGroups0" value="[Group1, Group4]"/>
    <att type="string" name="GOID0" value="GO:0031669"/>
    <att type="string" name="GOLevels0" value="[4, 5]"/>
    <att type="string" name="GOTerm0" value="cellular response to nutrient levels"/>
    <att type="string" name="Group PValue Corrected with Bonferroni0" value="{Group1=0.11288642812032629, Group4=0.0036532098882545404}"/>
    <att type="string" name="Group PValue0" value="{Group1=0.0066403781247250755, Group4=2.1489469930909062E-4}"/>
    <att type="integer" name="Nr. Genes0" value="4"/>
    <att type="string" name="Ontology Source0" value="GO_BiologicalProcess_05.05.2011_16h22"/>
    <att type="string" name="OverViewTerm0" value="FALSE"/>
    <att type="real" name="Term PValue Corrected with Bonferroni0" value="1.0"/>
    <att type="real" name="Term PValue0" value="0.02482418578669655"/>
    <att type="string" name="canonicalName" value="GO:00316690"/>
    <graphics type="ELLIPSE" h="30.0" w="30.000008583068848" x="15.889295101165771" y="1122.15869140625" fill="#1cf83d" width="1" outline="#000000"/>
  </node>
  <node label="GO:00316680" id="-135">
    <att type="real" name="% Associated Genes0" value="4.040403842926025"/>
    <att type="string" name="All Associated Genes0" value="[AT1G27320, AT1G43700, AT1G55920, AT1G79050, AT2G11810, AT2G19590, AT2G33770, AT2G45170, AT3G04530, AT3G06190, AT3G16785, AT3G23430, AT3G47340, AT3G62980, AT4G00550, AT4G03190, AT4G33030, AT4g04955, AT5G20410, AT5G60410, AT5G61420, ATG12A, ATG12B, ATL31, ATR1, At1g05680, At1g09020, At1g13300, At1g23010/F19G10_5, At1g29395/F15D2_29, At1g54210, At1g68320, At2g21410, At2g22240, At3g03250, At3g03520, At3g08860, At3g09922, At3g18290, At3g27740, At3g55880, At3g61710, At4g39080, At5g07690, At5g21040, At5g23630, At5g26880, At5g42870, At5g45380, At5g48850, BGLU21, BHLH32, BHLH47, BOR4, BPM1, BPM4, BPM5, CARB, CAT1, CAT2, CHIB1, CIPK9, COR413-PM1, CYS1, DOR, F11F8_14, GPX3, GTE10, GTL1, KINB1, NIP5-1, NIP6-1, NIT3, PAP12, PCKA, PHF1, PHO1-H1, PHT1-1, PHT1-2, PLDEPSILON, PLDP2, PS2, PYD1A, PYD2, PYD3, PYRB, PYRE-F, RECQL1, RECQL5, RTY/SUR1, SPX2, SPX3, SULTR1, T21P5, TTL, UPP, WOL, WRKY6, gst8]"/>
    <att type="string" name="Associated Genes Found0" value="[AT2G33770, AT2G45170, AT3G16785, AT3G47340]"/>
    <att type="string" name="GOGroups0" value="[Group1, Group4]"/>
    <att type="string" name="GOID0" value="GO:0031668"/>
    <att type="string" name="GOLevels0" value="[3, 4]"/>
    <att type="string" name="GOTerm0" value="cellular response to extracellular stimulus"/>
    <att type="string" name="Group PValue Corrected with Bonferroni0" value="{Group1=0.11288642812032629, Group4=0.0036532098882545404}"/>
    <att type="string" name="Group PValue0" value="{Group1=0.0066403781247250755, Group4=2.1489469930909062E-4}"/>
    <att type="integer" name="Nr. Genes0" value="4"/>
    <att type="string" name="Ontology Source0" value="GO_BiologicalProcess_05.05.2011_16h22"/>
    <att type="string" name="OverViewTerm0" value="FALSE"/>
    <att type="real" name="Term PValue Corrected with Bonferroni0" value="1.0"/>
    <att type="real" name="Term PValue0" value="0.04660541567040613"/>
    <att type="string" name="canonicalName" value="GO:00316680"/>
    <graphics type="ELLIPSE" h="30.0" w="30.000038146972656" x="-20.110721588134766" y="1104.15869140625" fill="#1cf83d" width="1" outline="#000000"/>
  </node>
  <node label="GO:00316670" id="-134">
    <att type="real" name="% Associated Genes0" value="4.34782600402832"/>
    <att type="string" name="All Associated Genes0" value="[AT1G05630, AT1G27320, AT1G30270, AT1G43700, AT1G55920, AT2G11810, AT2G14210, AT2G19590, AT2G33770, AT2G45170, AT3G04530, AT3G16785, AT3G23430, AT3G47340, AT3G62980, AT4G00550, AT4G03190, AT4G33030, AT4g04955, AT5G17290, AT5G20410, AT5G60410, AT5G61420, ATG12A, ATG12B, ATL31, ATR1, At1g03380, At1g09020, At1g13300, At1g23010/F19G10_5, At1g54210, At1g54710, At1g68320, At2g21410, At2g22240, At2g26890, At2g29630, At3g03250, At3g03520, At3g08860, At3g09922, At3g18290, At3g27740, At3g55880, At3g61710, At3g62770, At4g39080, At5g07690, At5g21040, At5g23630, At5g26880, At5g42870, At5g45380, At5g48850, At5g54730, BGLU21, BHLH32, BHLH47, BOR4, CARB, CAT1, CAT2, CIPK9, F11F8_14, GTE10, KIN10, KINB1, NIP5-1, NIP6-1, NIT3, PAP12, PCKA, PHF1, PHO1-H1, PHT1-1, PHT1-2, PLDEPSILON, PLDP2, PS2, PYD1A, PYD2, PYD3, PYRB, PYRE-F, SPX2, SPX3, SULTR1, T21P5, UPP, WOL, WRKY6]"/>
    <att type="string" name="Associated Genes Found0" value="[AT2G33770, AT2G45170, AT3G16785, AT3G47340]"/>
    <att type="string" name="GOGroups0" value="[Group1, Group4]"/>
    <att type="string" name="GOID0" value="GO:0031667"/>
    <att type="string" name="GOLevels0" value="[4]"/>
    <att type="string" name="GOTerm0" value="response to nutrient levels"/>
    <att type="string" name="Group PValue Corrected with Bonferroni0" value="{Group1=0.11288642812032629, Group4=0.0036532098882545404}"/>
    <att type="string" name="Group PValue0" value="{Group1=0.0066403781247250755, Group4=2.1489469930909062E-4}"/>
    <att type="integer" name="Nr. Genes0" value="4"/>
    <att type="string" name="Ontology Source0" value="GO_BiologicalProcess_05.05.2011_16h22"/>
    <att type="string" name="OverViewTerm0" value="FALSE"/>
    <att type="real" name="Term PValue Corrected with Bonferroni0" value="1.0"/>
    <att type="real" name="Term PValue0" value="0.03718943497741874"/>
    <att type="string" name="canonicalName" value="GO:00316670"/>
    <graphics type="ELLIPSE" h="30.0" w="30.000001907348633" x="38.88930034637451" y="1166.15869140625" fill="#1cf83d" width="1" outline="#000000"/>
  </node>
  <node label="GO:00314080" id="-133">
    <att type="real" name="% Associated Genes0" value="12.903225898742676"/>
    <att type="string" name="All Associated Genes0" value="[4CLL5, 4CLL7, 4CLL9, AT1G13280, AT1G19640, AT1G55020, AT1G76690, AT2G44810, AT3G15850, AT3G25760, AT3G25770, AT3G25780, AT4G16760, AT4G29010, AT5G42650, AT5G46240, ATS1, At1g61850, At2g26560/T9J223, At5g55240, DGL, FLU, KAT5, LOX2, LOX3, LOX4, LOX5, LOX6, OPR1, OPR3, PED1]"/>
    <att type="string" name="Associated Genes Found0" value="[AT3G15850, AT3G25780, AT4G16760, AT5G46240]"/>
    <att type="string" name="GOGroups0" value="[Group2, Group5]"/>
    <att type="string" name="GOID0" value="GO:0031408"/>
    <att type="string" name="GOLevels0" value="[5, 6, 7, 8, 9]"/>
    <att type="string" name="GOTerm0" value="oxylipin biosynthetic process"/>
    <att type="string" name="Group PValue Corrected with Bonferroni0" value="{Group2=2.667419925045739E-10, Group5=2.6136523534972203E-9}"/>
    <att type="string" name="Group PValue0" value="{Group2=1.5690705441445522E-11, Group5=1.5374425608807179E-10}"/>
    <att type="integer" name="Nr. Genes0" value="4"/>
    <att type="string" name="Ontology Source0" value="GO_BiologicalProcess_05.05.2011_16h22"/>
    <att type="string" name="OverViewTerm0" value="FALSE"/>
    <att type="real" name="Term PValue Corrected with Bonferroni0" value="0.11852229449498705"/>
    <att type="real" name="Term PValue0" value="7.954516409059534E-4"/>
    <att type="string" name="canonicalName" value="GO:00314080"/>
    <graphics type="ELLIPSE" h="30.0" w="30.00006103515625" x="340.9793701171875" y="359.7363586425781" fill="#4d1a74" width="1" outline="#000000"/>
  </node>
  <node label="GO:00314070" id="-132">
    <att type="real" name="% Associated Genes0" value="11.428571701049805"/>
    <att type="string" name="All Associated Genes0" value="[4CLL5, 4CLL7, 4CLL9, AT1G13280, AT1G19640, AT1G55020, AT1G76690, AT2G44810, AT3G15850, AT3G25760, AT3G25770, AT3G25780, AT4G16760, AT4G29010, AT5G42650, AT5G46240, ATS1, At1g61850, At2g26560/T9J223, At2g33380/F4P95, At5g07010, At5g55240, C7A1010, DGL, FLU, JAR1, KAT5, LOX2, LOX3, LOX4, LOX5, LOX6, OPR1, OPR3, PED1]"/>
    <att type="string" name="Associated Genes Found0" value="[AT3G15850, AT3G25780, AT4G16760, AT5G46240]"/>
    <att type="string" name="GOGroups0" value="[Group2, Group5]"/>
    <att type="string" name="GOID0" value="GO:0031407"/>
    <att type="string" name="GOLevels0" value="[5, 6, 8]"/>
    <att type="string" name="GOTerm0" value="oxylipin metabolic process"/>
    <att type="string" name="Group PValue Corrected with Bonferroni0" value="{Group2=2.667419925045739E-10, Group5=2.6136523534972203E-9}"/>
    <att type="string" name="Group PValue0" value="{Group2=1.5690705441445522E-11, Group5=1.5374425608807179E-10}"/>
    <att type="integer" name="Nr. Genes0" value="4"/>
    <att type="string" name="Ontology Source0" value="GO_BiologicalProcess_05.05.2011_16h22"/>
    <att type="string" name="OverViewTerm0" value="FALSE"/>
    <att type="real" name="Term PValue Corrected with Bonferroni0" value="0.18899677613341656"/>
    <att type="real" name="Term PValue0" value="0.0012684347391504467"/>
    <att type="string" name="canonicalName" value="GO:00314070"/>
    <graphics type="ELLIPSE" h="30.0" w="30.000030517578125" x="436.7909393310547" y="432.6943359375" fill="#4d1a74" width="1" outline="#000000"/>
  </node>
  <node label="GO:00313470" id="-131">
    <att type="real" name="% Associated Genes0" value="6.49350643157959"/>
    <att type="string" name="All Associated Genes0" value="[ABCG36, ASHH2, AT1G02450, AT1G33520, AT1G74710, AT1G80680, AT1G80840, AT2G18790, AT2G18950, AT2G22330, AT2G25000, AT2G39940, AT2G43790, AT3G15210, AT3G18690, AT3G26830, AT3G61190, AT4G11260, AT4G12720, AT4G15900, AT4G18470, AT4G25230, AT4G31800, AT4G37000, AT4G39030, AT4g22300, AT5G13220, AT5G23570, AT5G35620, AT5G40990, AT5G47220, AT5G51450, AT5G59890, AT5G60410, ATMKK3, At1g25540, At1g71220, At1g77470, At2g25620, At3g05360, At4g16990, At4g37460/F6G17_110, At5g09230, At5g22330, At5g48380, CALS12, CPR30, CRT3, EFR, EIN2, F14G92, F22O6_190, F24J70, FMO1, GH32, ILL5, ILL6, JAR1, KIN11, MLO2, MOS4, PBA1, PYK10, RAP1, RIN4, RPS4, SAS1, SGT1A, SOBIR1, SYP121, SYP122, VTE1, WRKY53, WRKY54, WRKY58, WRKY70, erd2]"/>
    <att type="string" name="Associated Genes Found0" value="[AT1G02450, AT2G22330, AT3G26830, AT4G31800, AT5G13220]"/>
    <att type="string" name="GOGroups0" value="[Group11]"/>
    <att type="string" name="GOID0" value="GO:0031347"/>
    <att type="string" name="GOLevels0" value="[5]"/>
    <att type="string" name="GOTerm0" value="regulation of defense response"/>
    <att type="string" name="Group PValue Corrected with Bonferroni0" value="{Group11=1.5686285002411636E-22}"/>
    <att type="string" name="Group PValue0" value="{Group11=9.227226472006844E-24}"/>
    <att type="integer" name="Nr. Genes0" value="5"/>
    <att type="string" name="Ontology Source0" value="GO_BiologicalProcess_05.05.2011_16h22"/>
    <att type="string" name="OverViewTerm0" value="FALSE"/>
    <att type="real" name="Term PValue Corrected with Bonferroni0" value="0.600818517067925"/>
    <att type="real" name="Term PValue0" value="0.004032339040724329"/>
    <att type="string" name="canonicalName" value="GO:00313470"/>
    <graphics type="ELLIPSE" h="30.0" w="30.0" x="1058.0" y="906.0" fill="#02068d" width="1" outline="#000000"/>
  </node>
  <node label="GO:00313280" id="-130">
    <att type="real" name="% Associated Genes0" value="5.15463924407959"/>
    <att type="string" name="All Associated Genes0" value="[AT1G21600, AT1G28300, AT1G45249, AT1G62180, AT1G69120, AT2G20570, AT2G23430, AT2G36270, AT2G36490, AT2G42680, AT3G01470, AT3G08720, AT3G08730, AT3G11440, AT3G24140, AT3G24500, AT3G26744, AT3G26790, AT3G58680, AT3G60390, AT3G61890, AT4G40060, AT5G06100, AT5G08565, AT5G22220, AT5G22260, AT5G44190, AT5G47220, AT5G65310, ATHB-51, ATHB-6, ATHSFA2, At1g13950, At1g25540, At1g26630, At1g43860/F28H191, At1g61040, At1g69410, At1g71930, At1g73500/T9L24_8, At2g02540, At2g32460, At2g34210, At2g34640, At2g35530, At2g48070, At3g09210, At3g10800, At4g08350, At4g23450, At5g08565, At5g48930, At5g62380, At5g63670, BHLH54, BRN1, BRN2, CPL2, DOF3, DOF5, DPBF2, E2FA, ELF8, ERABP1, F18K100, F24M1200, F27K19_170, FZR1, GATA12, GATA2, GATA3, GATA4, GATA5, GATA6, GATA7, GATA8, GATA9, GCN5, IRX1, NAC012, NAC043, NAC066, NAC078, NAC69, NFYB6, NFYB9, NFYC1, NFYC2, NPR6, NP_182035, PTAC2, Q42021, RAP1, SCL14, WRKY53, ZAP1, sig]"/>
    <att type="string" name="Associated Genes Found0" value="[AT2G42680, AT3G08720, AT3G60390, AT3G61890, AT5G44190]"/>
    <att type="string" name="GOGroups0" value="[Group6]"/>
    <att type="string" name="GOID0" value="GO:0031328"/>
    <att type="string" name="GOLevels0" value="[6]"/>
    <att type="string" name="GOTerm0" value="positive regulation of cellular biosynthetic process"/>
    <att type="string" name="Group PValue Corrected with Bonferroni0" value="{Group6=0.005947125430452599}"/>
    <att type="string" name="Group PValue0" value="{Group6=3.498309076736823E-4}"/>
    <att type="integer" name="Nr. Genes0" value="5"/>
    <att type="string" name="Ontology Source0" value="GO_BiologicalProcess_05.05.2011_16h22"/>
    <att type="string" name="OverViewTerm0" value="FALSE"/>
    <att type="real" name="Term PValue Corrected with Bonferroni0" value="1.0"/>
    <att type="real" name="Term PValue0" value="0.010573781187021892"/>
    <att type="string" name="canonicalName" value="GO:00313280"/>
    <graphics type="ELLIPSE" h="30.0" w="30.0" x="1790.1171875" y="811.148681640625" fill="#6eee80" width="1" outline="#000000"/>
  </node>
  <node label="GO:00313250" id="-129">
    <att type="real" name="% Associated Genes0" value="4.6728973388671875"/>
    <att type="string" name="All Associated Genes0" value="[ASHH2, AT1G09530, AT1G21600, AT1G28300, AT1G45249, AT1G62180, AT1G69120, AT2G20570, AT2G23430, AT2G36270, AT2G36490, AT2G42680, AT3G01470, AT3G08720, AT3G08730, AT3G11440, AT3G24140, AT3G24500, AT3G26744, AT3G26790, AT3G58680, AT3G60390, AT3G61890, AT4G40060, AT5G06100, AT5G08565, AT5G11260, AT5G22220, AT5G22260, AT5G44190, AT5G47220, AT5G65310, ATHB-51, ATHB-6, ATHSFA2, At1g13950, At1g25540, At1g26630, At1g43860/F28H191, At1g61040, At1g67810, At1g69410, At1g71930, At1g73500/T9L24_8, At1g75500, At2g02540, At2g32460, At2g34210, At2g34640, At2g35530, At2g48070, At3g09210, At3g10800, At4g08350, At4g23450, At5g08565, At5g48930, At5g50210, At5g62380, At5g63670, BHLH54, BRN1, BRN2, CHR1, CPL2, DOF3, DOF5, DPBF2, E2FA, ELF8, ERABP1, F18K100, F24M1200, F27K19_170, FZR1, GATA12, GATA2, GATA3, GATA4, GATA5, GATA6, GATA7, GATA8, GATA9, GCN5, INO80, IRX1, NAC012, NAC043, NAC066, NAC078, NAC69, NFYB6, NFYB9, NFYC1, NFYC2, NPR6, NP_182035, PTAC2, Q42021, RABG3B, RAP1, REP, SCL14, WRKY53, ZAP1, sig]"/>
    <att type="string" name="Associated Genes Found0" value="[AT2G42680, AT3G08720, AT3G60390, AT3G61890, AT5G44190]"/>
    <att type="string" name="GOGroups0" value="[Group6]"/>
    <att type="string" name="GOID0" value="GO:0031325"/>
    <att type="string" name="GOLevels0" value="[5]"/>
    <att type="string" name="GOTerm0" value="positive regulation of cellular metabolic process"/>
    <att type="string" name="Group PValue Corrected with Bonferroni0" value="{Group6=0.005947125430452599}"/>
    <att type="string" name="Group PValue0" value="{Group6=3.498309076736823E-4}"/>
    <att type="integer" name="Nr. Genes0" value="5"/>
    <att type="string" name="Ontology Source0" value="GO_BiologicalProcess_05.05.2011_16h22"/>
    <att type="string" name="OverViewTerm0" value="FALSE"/>
    <att type="real" name="Term PValue Corrected with Bonferroni0" value="1.0"/>
    <att type="real" name="Term PValue0" value="0.01564826298322807"/>
    <att type="string" name="canonicalName" value="GO:00313250"/>
    <graphics type="ELLIPSE" h="30.0" w="30.0" x="1727.7197265625" y="759.663330078125" fill="#6eee80" width="1" outline="#000000"/>
  </node>
  <node label="GO:00313240" id="-128">
    <att type="real" name="% Associated Genes0" value="5.882352828979492"/>
    <att type="string" name="All Associated Genes0" value="[AHL21, AT1G02450, AT1G02580, AT1G02970, AT1G20330, AT1G24190, AT1G54160, AT1G59750, AT1G61720, AT1G63020, AT2G22540, AT2G27040, AT2G32940, AT2G36490, AT2G39810, AT2G43410, AT2G43640, AT3G01320, AT3G15850, AT3G26790, AT3G48160, AT4G03190, AT4G05420, AT4G15900, AT4G16280, AT4G16780, AT4G24960, AT4G32551, AT4G38130, AT4G38620, AT5G02030, AT5G08550, AT5G10480, AT5G13060, AT5G13240, AT5G15380, AT5G17690, AT5G54500, AT5G57050, AT5G57740, AT5G62000, At1g14410, At1g26110, At1g65770, At1g74660, At2g30280, At2g32700, At2g47210, At3g02820/F13E7_24, At4g28110, At4g37460/F6G17_110, At5g09230, At5g26230, At5g40530, At5g42750, At5g55760, CHR1, CMT3, CPL1, DEGP7, DOF5, DRT112, F13E74, FAD6, GRXC7, GRXC8, GTL1, HAG2, HD2B, KRP2, MEE58, MOM1, MSH2, NFYA4, NFYA7, NFYA9, NUA, OSB1, PAP12, PKL, PME18, PSBO1, PSBO2, PUB44, RING1A, RING1B, RNS2, SAL1, SAS1, SKP1, SRP14, SRP9, SUVH5, T27I15_140, T29H11_50, T5E8_30, T8P1980, VAR1, VAR2, WRKY27, WRKY42, WRKY6]"/>
    <att type="string" name="Associated Genes Found0" value="[AT1G02450, AT2G27040, AT3G15850, AT5G10480, AT5G54500, AT5G57050]"/>
    <att type="string" name="GOGroups0" value="[Group10, Group5]"/>
    <att type="string" name="GOID0" value="GO:0031324"/>
    <att type="string" name="GOLevels0" value="[5]"/>
    <att type="string" name="GOTerm0" value="negative regulation of cellular metabolic process"/>
    <att type="string" name="Group PValue Corrected with Bonferroni0" value="{Group10=0.006736712397954536, Group5=2.6136523534972203E-9}"/>
    <att type="string" name="Group PValue0" value="{Group10=3.962771998796786E-4, Group5=1.5374425608807179E-10}"/>
    <att type="integer" name="Nr. Genes0" value="6"/>
    <att type="string" name="Ontology Source0" value="GO_BiologicalProcess_05.05.2011_16h22"/>
    <att type="string" name="OverViewTerm0" value="FALSE"/>
    <att type="real" name="Term PValue Corrected with Bonferroni0" value="0.4083631202296175"/>
    <att type="real" name="Term PValue0" value="0.0027406920820779697"/>
    <att type="string" name="canonicalName" value="GO:00313240"/>
    <graphics type="ELLIPSE" h="29.999969482421875" w="30.0" x="1122.70068359375" y="439.76307678222656" fill="#8be2c9" width="1" outline="#000000"/>
  </node>
  <node label="GO:00302580" id="-127">
    <att type="real" name="% Associated Genes0" value="8.333333015441895"/>
    <att type="string" name="All Associated Genes0" value="[ASAT1, AT1G03000, AT1G06290, AT1G72970, AT1G79810, AT2G11810, AT2G26350, AT3G07020, AT3G07560, AT3G51840, AT4G16760, AT5G20410, AT5G25760, AT5G65110, At1g43620, At1g47510, At1g60490, At1g73740/F25P226, At3g01420/T13O15, At3g05290, At3g07020, At5g27520, At5g42890, ECH2, MFP2, MGD1, PED1, PEX1, PEX12, PI4KALPHA1, PI4KALPHA2, PI4KBETA1, PI4KBETA2, PIP5K1, PSAT, dl4380w]"/>
    <att type="string" name="Associated Genes Found0" value="[AT3G51840, AT4G16760, AT5G65110]"/>
    <att type="string" name="GOGroups0" value="[Group11, Group2]"/>
    <att type="string" name="GOID0" value="GO:0030258"/>
    <att type="string" name="GOLevels0" value="[4, 5]"/>
    <att type="string" name="GOTerm0" value="lipid modification"/>
    <att type="string" name="Group PValue Corrected with Bonferroni0" value="{Group11=1.5686285002411636E-22, Group2=2.667419925045739E-10}"/>
    <att type="string" name="Group PValue0" value="{Group11=9.227226472006844E-24, Group2=1.5690705441445522E-11}"/>
    <att type="integer" name="Nr. Genes0" value="3"/>
    <att type="string" name="Ontology Source0" value="GO_BiologicalProcess_05.05.2011_16h22"/>
    <att type="string" name="OverViewTerm0" value="FALSE"/>
    <att type="real" name="Term PValue Corrected with Bonferroni0" value="1.0"/>
    <att type="real" name="Term PValue0" value="0.012849756119705059"/>
    <att type="string" name="canonicalName" value="GO:00302580"/>
    <graphics type="ELLIPSE" h="30.0" w="30.0" x="519.0" y="678.0" fill="#02068d" width="1" outline="#000000"/>
  </node>
  <node label="GO:00230570" id="-126">
    <att type="real" name="% Associated Genes0" value="10.256410598754883"/>
    <att type="string" name="All Associated Genes0" value="[AHL25, AIP2, AT1G14920, AT1G50640, AT1G66340, AT1G66350, AT2G01570, AT2G25490, AT3G02140, AT3G03450, AT3G11540, AT3G15210, AT3G48040, AT3G59380, AT4G01060, AT4G26080, AT5G01810, AT5G03730, AT5G08335, AT5G10720, AT5G23320, AT5G25350, AT5G57050, AT5G64750, ATHB-6, At2g26070, At2g39550, DOR, DWA1, DWA2, EIN4, ERS1, ERS2, ETR2, GLIP2, NAC002, PKL, PP2CA, SAL1]"/>
    <att type="string" name="Associated Genes Found0" value="[AT2G25490, AT4G01060, AT4G26080, AT5G57050]"/>
    <att type="string" name="GOGroups0" value="[Group11, Group5]"/>
    <att type="string" name="GOID0" value="GO:0023057"/>
    <att type="string" name="GOLevels0" value="[4]"/>
    <att type="string" name="GOTerm0" value="negative regulation of signaling"/>
    <att type="string" name="Group PValue Corrected with Bonferroni0" value="{Group11=1.5686285002411636E-22, Group5=2.6136523534972203E-9}"/>
    <att type="string" name="Group PValue0" value="{Group11=9.227226472006844E-24, Group5=1.5374425608807179E-10}"/>
    <att type="integer" name="Nr. Genes0" value="4"/>
    <att type="string" name="Ontology Source0" value="GO_BiologicalProcess_05.05.2011_16h22"/>
    <att type="string" name="OverViewTerm0" value="FALSE"/>
    <att type="real" name="Term PValue Corrected with Bonferroni0" value="0.2845191509556112"/>
    <att type="real" name="Term PValue0" value="0.0019095245030577932"/>
    <att type="string" name="canonicalName" value="GO:00230570"/>
    <graphics type="ELLIPSE" h="30.0" w="30.0" x="938.5146484375" y="714.6439819335938" fill="#02068d" width="1" outline="#000000"/>
  </node>
  <node label="GO:00230510" id="-125">
    <att type="real" name="% Associated Genes0" value="5.833333492279053"/>
    <att type="string" name="All Associated Genes0" value="[AGD13, AGD4, AHL25, AIP2, AT1G04830, AT1G08680, AT1G14920, AT1G17440, AT1G50640, AT1G66340, AT1G66350, AT2G01570, AT2G04550, AT2G25490, AT2G35210, AT2G37290, AT2G37550, AT2G39280, AT2G43490, AT3G02140, AT3G03450, AT3G07490, AT3G11540, AT3G15210, AT3G16360, AT3G17660, AT3G21510, AT3G29350, AT3G43300, AT3G45640, AT3G48040, AT3G50500, AT3G53710, AT3G55530, AT3G59380, AT4G01060, AT4G09570, AT4G13730, AT4G17890, AT4G19660, AT4G21160, AT4G26080, AT4G33680, AT5G01810, AT5G03730, AT5G06100, AT5G08335, AT5G10720, AT5G13220, AT5G23320, AT5G25350, AT5G39340, AT5G46750, AT5G52200, AT5G52580, AT5G53000, AT5G54310, AT5G57050, AT5G60410, AT5G61980, AT5G64750, AT5G66880, ATCDPK2, ATHB-6, At1g01960, At1g04450, At1g14000, At1g52920, At2g14490, At2g26070, At2g31800, At2g32460, At2g39550, At2g43850, At3g06110/F28L1_5, At4g18950, At4g20380, At4g23450, At4g32630, At5g39500, At5g52200, BGLU18, DOR, DWA1, DWA2, EIN2, EIN4, ERS1, ERS2, ETR2, F20D1020, F23E120, F24G1600, F7K15_150, GID1A, GID1B, GID1C, GLIP2, GN, GP ALPHA 1, MMS21, NAC002, NP_001154777, NUDT6, PED1, PKL, PLDALPHA1, PP2AA1, PP2CA, PYL8, RHA2A, SAL1, SFC, SNE, SSP, T20N10_110, T22K7_10, T4C21_270, T9E80, TTL1]"/>
    <att type="string" name="Associated Genes Found0" value="[AT2G25490, AT3G45640, AT3G50500, AT4G01060, AT4G26080, AT5G13220, AT5G57050]"/>
    <att type="string" name="GOGroups0" value="[Group11, Group16, Group5]"/>
    <att type="string" name="GOID0" value="GO:0023051"/>
    <att type="string" name="GOLevels0" value="[3]"/>
    <att type="string" name="GOTerm0" value="regulation of signaling"/>
    <att type="string" name="Group PValue Corrected with Bonferroni0" value="{Group11=1.5686285002411636E-22, Group16=6.128750210897452E-6, Group5=2.6136523534972203E-9}"/>
    <att type="string" name="Group PValue0" value="{Group11=9.227226472006844E-24, Group16=3.605147182880854E-7, Group5=1.5374425608807179E-10}"/>
    <att type="integer" name="Nr. Genes0" value="7"/>
    <att type="string" name="Ontology Source0" value="GO_BiologicalProcess_05.05.2011_16h22"/>
    <att type="string" name="OverViewTerm0" value="FALSE"/>
    <att type="real" name="Term PValue Corrected with Bonferroni0" value="0.19331108817446008"/>
    <att type="real" name="Term PValue0" value="0.0012973898535198662"/>
    <att type="string" name="canonicalName" value="GO:00230510"/>
    <graphics type="ELLIPSE" h="29.99993896484375" w="30.0" x="924.7030639648438" y="628.6692810058594" fill="#02068d" width="1" outline="#000000"/>
  </node>
  <node label="GO:00197610" id="-124">
    <att type="real" name="% Associated Genes0" value="10.344827651977539"/>
    <att type="string" name="All Associated Genes0" value="[AT1G16400, AT1G16410, AT1G18570, AT1G24100, AT2G22330, AT3G09710, AT3G19710, AT4G13770, AT5G05260, AT5G23020, ATR1, At1g65880, CYP83B1, FMOGS-OX1, FMOGS-OX2, FMOGS-OX3, FMOGS-OX4, FMOGS-OX5, GSL-OH, IIL1, IMDH3, MAM1, RML1, RTY/SUR1, SOT16, SOT17, SOT18, T4I9, cyp81F2]"/>
    <att type="string" name="Associated Genes Found0" value="[AT1G16410, AT1G18570, AT2G22330]"/>
    <att type="string" name="GOGroups0" value="[Group11]"/>
    <att type="string" name="GOID0" value="GO:0019761"/>
    <att type="string" name="GOLevels0" value="[5, 7, 8, 9]"/>
    <att type="string" name="GOTerm0" value="glucosinolate biosynthetic process"/>
    <att type="string" name="Group PValue Corrected with Bonferroni0" value="{Group11=1.5686285002411636E-22}"/>
    <att type="string" name="Group PValue0" value="{Group11=9.227226472006844E-24}"/>
    <att type="integer" name="Nr. Genes0" value="3"/>
    <att type="string" name="Ontology Source0" value="GO_BiologicalProcess_05.05.2011_16h22"/>
    <att type="string" name="OverViewTerm0" value="FALSE"/>
    <att type="real" name="Term PValue Corrected with Bonferroni0" value="1.0"/>
    <att type="real" name="Term PValue0" value="0.0070508987772062645"/>
    <att type="string" name="canonicalName" value="GO:00197610"/>
    <graphics type="ELLIPSE" h="30.0" w="30.0" x="666.0" y="1271.0" fill="#02068d" width="1" outline="#000000"/>
  </node>
  <node label="GO:00197600" id="-123">
    <att type="real" name="% Associated Genes0" value="8.0"/>
    <att type="string" name="All Associated Genes0" value="[ABCG36, AT1G04580, AT1G16400, AT1G16410, AT1G18570, AT1G24100, AT2G22330, AT3G09710, AT3G19710, AT4G13770, AT4G37430, AT5G05260, AT5G23020, AT5G44070, ATR1, At1g21100, At1g21120, At1g65880, At4g37400, BGLU26, CYP83B1, ESM1, ESP, F6G170, FMOGS-OX1, FMOGS-OX2, FMOGS-OX3, FMOGS-OX4, FMOGS-OX5, GSL-OH, HOL1, IIL1, IMDH3, MAM1, NIT3, NSP1, NSP2, NSP3, NSP4, NSP5, RML1, RTY/SUR1, SOT16, SOT17, SOT18, T4I9, TGG1, TGG2, TGG4, cyp81F2]"/>
    <att type="string" name="Associated Genes Found0" value="[AT1G16410, AT1G18570, AT2G22330, AT5G44070]"/>
    <att type="string" name="GOGroups0" value="[Group11]"/>
    <att type="string" name="GOID0" value="GO:0019760"/>
    <att type="string" name="GOLevels0" value="[4, 6, 7, 8]"/>
    <att type="string" name="GOTerm0" value="glucosinolate metabolic process"/>
    <att type="string" name="Group PValue Corrected with Bonferroni0" value="{Group11=1.5686285002411636E-22}"/>
    <att type="string" name="Group PValue0" value="{Group11=9.227226472006844E-24}"/>
    <att type="integer" name="Nr. Genes0" value="4"/>
    <att type="string" name="Ontology Source0" value="GO_BiologicalProcess_05.05.2011_16h22"/>
    <att type="string" name="OverViewTerm0" value="FALSE"/>
    <att type="real" name="Term PValue Corrected with Bonferroni0" value="0.7089339515773669"/>
    <att type="real" name="Term PValue0" value="0.004757945983740718"/>
    <att type="string" name="canonicalName" value="GO:00197600"/>
    <graphics type="ELLIPSE" h="30.0" w="30.0" x="826.0" y="1326.0" fill="#02068d" width="1" outline="#000000"/>
  </node>
  <node label="GO:00197580" id="-122">
    <att type="real" name="% Associated Genes0" value="10.344827651977539"/>
    <att type="string" name="All Associated Genes0" value="[AT1G16400, AT1G16410, AT1G18570, AT1G24100, AT2G22330, AT3G09710, AT3G19710, AT4G13770, AT5G05260, AT5G23020, ATR1, At1g65880, CYP83B1, FMOGS-OX1, FMOGS-OX2, FMOGS-OX3, FMOGS-OX4, FMOGS-OX5, GSL-OH, IIL1, IMDH3, MAM1, RML1, RTY/SUR1, SOT16, SOT17, SOT18, T4I9, cyp81F2]"/>
    <att type="string" name="Associated Genes Found0" value="[AT1G16410, AT1G18570, AT2G22330]"/>
    <att type="string" name="GOGroups0" value="[Group11]"/>
    <att type="string" name="GOID0" value="GO:0019758"/>
    <att type="string" name="GOLevels0" value="[4, 6, 7, 8]"/>
    <att type="string" name="GOTerm0" value="glycosinolate biosynthetic process"/>
    <att type="string" name="Group PValue Corrected with Bonferroni0" value="{Group11=1.5686285002411636E-22}"/>
    <att type="string" name="Group PValue0" value="{Group11=9.227226472006844E-24}"/>
    <att type="integer" name="Nr. Genes0" value="3"/>
    <att type="string" name="Ontology Source0" value="GO_BiologicalProcess_05.05.2011_16h22"/>
    <att type="string" name="OverViewTerm0" value="FALSE"/>
    <att type="real" name="Term PValue Corrected with Bonferroni0" value="1.0"/>
    <att type="real" name="Term PValue0" value="0.0070508987772062645"/>
    <att type="string" name="canonicalName" value="GO:00197580"/>
    <graphics type="ELLIPSE" h="30.0" w="30.0" x="795.0" y="1296.0" fill="#02068d" width="1" outline="#000000"/>
  </node>
  <node label="GO:00197570" id="-121">
    <att type="real" name="% Associated Genes0" value="8.0"/>
    <att type="string" name="All Associated Genes0" value="[ABCG36, AT1G04580, AT1G16400, AT1G16410, AT1G18570, AT1G24100, AT2G22330, AT3G09710, AT3G19710, AT4G13770, AT4G37430, AT5G05260, AT5G23020, AT5G44070, ATR1, At1g21100, At1g21120, At1g65880, At4g37400, BGLU26, CYP83B1, ESM1, ESP, F6G170, FMOGS-OX1, FMOGS-OX2, FMOGS-OX3, FMOGS-OX4, FMOGS-OX5, GSL-OH, HOL1, IIL1, IMDH3, MAM1, NIT3, NSP1, NSP2, NSP3, NSP4, NSP5, RML1, RTY/SUR1, SOT16, SOT17, SOT18, T4I9, TGG1, TGG2, TGG4, cyp81F2]"/>
    <att type="string" name="Associated Genes Found0" value="[AT1G16410, AT1G18570, AT2G22330, AT5G44070]"/>
    <att type="string" name="GOGroups0" value="[Group11]"/>
    <att type="string" name="GOID0" value="GO:0019757"/>
    <att type="string" name="GOLevels0" value="[3, 5, 6, 7]"/>
    <att type="string" name="GOTerm0" value="glycosinolate metabolic process"/>
    <att type="string" name="Group PValue Corrected with Bonferroni0" value="{Group11=1.5686285002411636E-22}"/>
    <att type="string" name="Group PValue0" value="{Group11=9.227226472006844E-24}"/>
    <att type="integer" name="Nr. Genes0" value="4"/>
    <att type="string" name="Ontology Source0" value="GO_BiologicalProcess_05.05.2011_16h22"/>
    <att type="string" name="OverViewTerm0" value="FALSE"/>
    <att type="real" name="Term PValue Corrected with Bonferroni0" value="0.7089339515773669"/>
    <att type="real" name="Term PValue0" value="0.004757945983740718"/>
    <att type="string" name="canonicalName" value="GO:00197570"/>
    <graphics type="ELLIPSE" h="30.0" w="30.0" x="762.0" y="1311.0" fill="#02068d" width="1" outline="#000000"/>
  </node>
  <node label="GO:00197520" id="-120">
    <att type="real" name="% Associated Genes0" value="4.255319118499756"/>
    <att type="string" name="All Associated Genes0" value="[20ox1, 20ox2, 20ox3, 4CLL5, 4CLL7, 4CLL9, A0MF23, ACC2, ACL1, ACO3, ACP-1, AK2, AK3, AKHSDH1, AKHSDH2, ALAAT1, AMPBP7, ARD1, ARD2, ARD3, AT1G01480, AT1G01610, AT1G02205, AT1G02860, AT1G03000, AT1G04580, AT1G04640, AT1G05160, AT1G05560, AT1G06080, AT1G06290, AT1G06570, AT1G07720, AT1G08250, AT1G08630, AT1G09620, AT1G10070, AT1G11790, AT1G13280, AT1G14520, AT1G14610, AT1G15045, AT1G15550, AT1G16540, AT1G17745, AT1G18270, AT1G19640, AT1G22640, AT1G25220, AT1G25350, AT1G27140, AT1G29410, AT1G30100, AT1G49430, AT1G50200, AT1G51500, AT1G52340, AT1G53000, AT1G55020, AT1G55920, AT1G62180, AT1G62380, AT1G62800, AT1G62960, AT1G65960, AT1G66860, AT1G72970, AT1G73250, AT1G74710, AT1G76690, AT1G78390, AT1G78660, AT1G78680, AT1G79440, AT1G79810, AT1G80340, AT2G02390, AT2G11810, AT2G14750, AT2G15090, AT2G16370, AT2G16500, AT2G18790, AT2G18950, AT2G19590, AT2G19800, AT2G22330, AT2G22810, AT2G26310, AT2G26350, AT2G27150, AT2G27820, AT2G28630, AT2G29690, AT2G29980, AT2G31360, AT2G31810, AT2G32440, AT2G37550, AT2G38110, AT2G39800, AT2G43090, AT2G43360, AT2G44160, AT2G44810, AT2G45690, AT3G01120, AT3G02580, AT3G04520, AT3G07560, AT3G07630, AT3G09920, AT3G11430, AT3G14440, AT3G15850, AT3G19710, AT3G23940, AT3G24220, AT3G25760, AT3G25770, AT3G25780, AT3G25900, AT3G29200, AT3G44720, AT3G47340, AT3G49700, AT3G51840, AT3G52200, AT3G54010, AT3G59970, AT3G63250, AT3g04520/T27C4_17, AT4G00360, AT4G00400, AT4G02780, AT4G04610, AT4G08040, AT4G11280, AT4G14720, AT4G14850, AT4G14910, AT4G15090, AT4G16760, AT4G18350, AT4G21990, AT4G22753, AT4G26200, AT4G26260, AT4G26483, AT4G26850, AT4G27070, AT4G28680, AT4G29010, AT4G31180, AT4G31990, AT4G33950, AT4G34510, AT4G34570, AT4G34710, AT4G35260, AT4G36220, AT4G37770, AT4G38220, AT4G39030, AT4G39280, AT4G39660, AT4G39940, AT4G39950, AT4G39980, AT4g11640, AT4g13050, AT4g26300, AT4g34200, AT5G03730, AT5G04230, AT5G05590, AT5G05730, AT5G05920, AT5G07440, AT5G10160, AT5G10240, AT5G10480, AT5G10880, AT5G10920, AT5G11520, AT5G12320, AT5G13280, AT5G13520, AT5G13790, AT5G15530, AT5G16715, AT5G19550, AT5G20410, AT5G20960, AT5G22630, AT5G23020, AT5G23190, AT5G25760, AT5G27380, AT5G36880, AT5G37300, AT5G37830, AT5G42650, AT5G43850, AT5G46240, AT5G46290, AT5G47120, AT5G48150, AT5G48220, AT5G49030, AT5G49070, AT5G51690, AT5G54080, AT5G55120, AT5G56640, AT5G57800, AT5G60540, AT5G62530, AT5G64813, AT5G65010, AT5G65110, AT5G65800, AT5G66230, ATNADP-ME2, ATPLDDELTA, ATR1, ATS1, ATSERAT1, ATSERAT2, A_TM021B04, At1g01280, At1g01600, At1g02205, At1g02400, At1g04410, At1g06090, At1g06100, At1g06120, At1g06350, At1g06360, At1g07420, At1g07780, At1g08510/T27G79, At1g08630, At1g08980, At1g09795/F21M129, At1g10060, At1g10070, At1g10670, At1g11870, At1g12050, At1g13950, At1g14290, At1g14810, At1g17745, At1g17960, At1g18130, At1g18270, At1g22020, At1g22410, At1g24360, At1g25155, At1g25220, At1g26630, At1g27160, At1g27980, At1g28120, At1g29410, At1g29870, At1g30120, At1g31860, At1g32440, At1g32470, At1g33320, At1g35580, At1g36370, At1g44090, At1g44820, At1g47578, At1g47990, At1g51720, At1g53240, At1g53520, At1g54220, At1g57750, At1g60990, At1g61850, At1g62640, At1g63660, At1g63710, At1g64660/F1N193, At1g65290, At1g65520, At1g65930, At1g65960, At1g66200, At1g66530, At1g67070, At1g67080, At1g67730, At1g68320, At1g68420, At1g69370/F23O10_5, At1g69410, At1g69640, At1g69920, At1g72550, At1g73680, At1g74260, At1g75980, At1g78660, At1g78670, At1g79750, At1g79900, At1g80330, At1g80555, At2g02000/F14H20, At2g02010, At2g02380, At2g03667, At2g04240, At2g04400, At2g04842, At2g05830, At2g05990, At2g13560, At2g14060, At2g17265, At2g17630, At2g19900/F6F22, At2g19940, At2g21550, At2g21940, At2g22230, At2g22780, At2g22910, At2g23560, At2g23580, At2g23600, At2g23620, At2g24850, At2g25840, At2g26310, At2g26310/T1D16, At2g26560/T9J223, At2g28880, At2g29390, At2g30200, At2g30650, At2g30660, At2g31170, At2g31810, At2g33380/F4P95, At2g33840, At2g35080, At2g35120, At2g37250, At2g37500, At2g37700, At2g43080, At2g43400, At2g44620, At2g45300, At2g46110, At2g46210, At3g01420/T13O15, At3g02660, At3g02760, At3g03480, At3g03630, At3g04600, At3g05290, At3g06300, At3g10030, At3g10870, At3g11710, At3g12990, At3g13490, At3g13930, At3g15020, At3g15290, At3g16565, At3g16950, At3g17720, At3g17760, At3g18680, At3g19480, At3g21780, At3g22200, At3g22425, At3g22460, At3g23940, At3g24170, At3g25110, At3g25530, At3g27740, At3g30770, At3g45770, At3g47520, At3g49680, At3g53180/T4D210, At3g55400, At3g55610, At3g55870, At3g57050, At3g58140, At3g58180, At3g58610, At4g00570, At4g04320, At4g08870, At4g08900, At4g12110, At4g12130, At4g13780, At4g14710, At4g14910, At4g20930, At4g22753, At4g22756, At4g23590, At4g24670, At4g24830, At4g26870, At4g26900, At4g28420, At4g28680, At4g29210, At4g30550, At4g31990, At4g32520, At4g33010, At4g33510, At4g33760/T16L1_250, At4g35630, At4g38220, At4g39280, At4g39540/F23K16_170, At4g39640, At4g39650, At5g04620, At5g05270, At5g07010, At5g07440, At5g09660, At5g10330, At5g14590, At5g16290, At5g20980, At5g21060, At5g25880, At5g26780, At5g27470, At5g27520, At5g28840, At5g36160, At5g38020, At5g38200, At5g38530, At5g38830, At5g42890, At5g43280, At5g43330, At5g46180, At5g47630, At5g48220, At5g48840, At5g49030, At5g50210, At5g50950, At5g52520, At5g52570, At5g52920, At5g53850, At5g53970, At5g55240, At5g56720, At5g57590, At5g57850, At5g57890, At5g58330, At5g60600, At5g61780, At5g63910, At5g64050, At5g65010, At5g66120, At5g67030, At5g67160, AtATP-PRT1, AtHDC, AtcysD2, BCAT1, BCAT2, BCAT3, BCAT5, BCAT6, BCAT7, BGLU18, BIG, C7A1010, CAC1, CAC2, CAC3, CARB, CER1-like, CHI1, CHI2, CHY1, CIMS, CLA1, CM2, CSR 1, CTIMC, CYP20-3, CYP707A1, CYP707A2, CYP707A3, CYP83B1, CYP86A1, CYP86A8, Cyt ACS 1, DAP, DAPB1, DAPB2, DAPB3, DAPF, DCR, DGL, DHDPS1, DHDPS2, DHS2, DXR, ECH2, ELI5, EMB1144, EMB86, ETFB, F10M1020, F10M2310, F10M2370, F11M157, F12E4_150, F12F1, F12F19, F12M12_70, F13M2390, F16M2_20, F18A580, F18K105, F18O21_260, F19F1860, F20O900, F21E102, F24G2420, F27K19_50, F28J1220, F28J1230, F2A1930, F2J10, F3O94, F4F7, F5K20_210, F6I180, F8F6_70, F9D160, FAB1, FAD2, FAD6, FAD7, FAD8, FAR3, FAR4, FAR5, FLU, FOLB1, FUM1, FUM2, GA2, GA2OX7, GAD, GALAK, GCN2, GCR1, GDCSH, GDCSP, GDCST, GDH1, GDH2, GGH, GH32, GLN1-1, GLN1-2, GLN1-3, GLN1-4, GLN1-5, GLT1, GLU1, GLU2, GLYRS-1, GLYRS-2, GP ALPHA 1, GR, GS2, GSH3, HDF7, HDH, HHT1, HIS6, HMT3, HPA2, ICDH, ICL, IDH5, IDH6, IIL1, IMDH1, IMDH2, IMDH3, IMPL2, IMS1, IPMS1, ISPD, JAR1, KAS, KAS1, KAT5, KCS1, KCS10, KCS11, KCS13, KCS14, KCS16, KCS18, KCS19, KCS2, KCS20, KCS21, KCS4, KCS5, KCS6, KCS7, KCS9, KIN10, KIN11, KINB1, KINB2, KING1, KO1, L73G190, LACS1, LACS3, LACS4, LACS5, LACS6, LACS7, LACS8, LACS9, LIP2p, LOX2, LOX3, LOX4, LOX5, LOX6, LTA2, LYSA1, LYSA2, MAM1, MAM2, MCCA, MCCB, MEE32, METK3, METK4, MFP2, MMT1, MTK, MTN1, MTN2, MTO1, NAGK, NAS1, NAS2, NAS3, NAS4, NFS2, NFXL1, NIFS, NIT1, NIT2, NP_001078324, NP_001154311, NP_001154640, NP_194570, NS2, OASA1, OASB, OASC, OMR1, OPR1, OPR3, OTC, P5CSA, P5CSB, PAL1, PAL2, PAL3, PAL4, PAT, PDX13, PED1, PEX1, PEX12, PHYLLO, PLDALPHA1, PMM, POX1, POX2, PROC1, PSP, PYRB, Q41907, Q42021, Q8LAA9, Q8LF92, Q93Z97, Q94A74, Q94AA6, Q9LG24, Q9LJT0, Q9LJT1, Q9LJT5, Q9LM23, Q9LPP9, Q9LQR9, Q9LQU9, Q9LQY8, Q9MA03, Q9SGN2, Q9SKV1, RML1, RTY/SUR1, S-ACP-DES1, S-ACP-DES2, S-ACP-DES3, S-ACP-DES4, S-ACP-DES5, S-ACP-DES6, SAM1, SAM2, SAT2, SAT4, SDH, SGT1, SHM1, SMO, SSI2, SYNC1, SYNC3, SYNO, T13K140, T16L150, T16L160, T17J13, T18F153, T19B17, T1E22_60, T1J1, T22E16, T24P22, T28A8_90, T31P16_230, T32N15, T4D210, T9J141, TAA1, THRRS, TS1, TS2, TSB1, TYRAAT1, TYRAAT2, UROS, USP, VDE1, VTC4, VTE1, WIN1, Z973356, accD, atms2, cer2, cyt1, dl3005c, dl3255c, dl3260c, hsr1, oas5, sld1]"/>
    <att type="string" name="Associated Genes Found0" value="[AT1G02205, AT1G07720, AT1G10070, AT1G17745, AT1G51500, AT1G62380, AT2G02390, AT2G22330, AT3G15850, AT3G25780, AT3G44720, AT3G47340, AT3G51840, AT3G59970, AT4G00400, AT4G11280, AT4G16760, AT4G21990, AT4G27070, AT4G39950, AT4G39980, AT5G05730, AT5G07440, AT5G10160, AT5G10240, AT5G10480, AT5G16715, AT5G20960, AT5G36880, AT5G46240, AT5G48220, AT5G54080, AT5G65010, AT5G65110]"/>
    <att type="string" name="GOGroups0" value="[Group11, Group2]"/>
    <att type="string" name="GOID0" value="GO:0019752"/>
    <att type="string" name="GOLevels0" value="[5]"/>
    <att type="string" name="GOTerm0" value="carboxylic acid metabolic process"/>
    <att type="string" name="Group PValue Corrected with Bonferroni0" value="{Group11=1.5686285002411636E-22, Group2=2.667419925045739E-10}"/>
    <att type="string" name="Group PValue0" value="{Group11=9.227226472006844E-24, Group2=1.5690705441445522E-11}"/>
    <att type="integer" name="Nr. Genes0" value="34"/>
    <att type="string" name="Ontology Source0" value="GO_BiologicalProcess_05.05.2011_16h22"/>
    <att type="string" name="OverViewTerm0" value="FALSE"/>
    <att type="real" name="Term PValue Corrected with Bonferroni0" value="5.385444649402027E-7"/>
    <att type="real" name="Term PValue0" value="3.6143923821490113E-9"/>
    <att type="string" name="canonicalName" value="GO:00197520"/>
    <graphics type="ELLIPSE" h="50.0" w="50.0" x="337.853515625" y="794.619140625" fill="#02068d" width="1" outline="#000000"/>
  </node>
  <node label="GO:00194390" id="-119">
    <att type="real" name="% Associated Genes0" value="13.333333015441895"/>
    <att type="string" name="All Associated Genes0" value="[ABCG36, AT1G06570, AT2G22330, AT2G38080, AT4G39950, AT5G01050, AT5G04230, AT5G44070, AT5G54080, At5g36160, BGLU26, LAC1, LAC10, LAC11, LAC12, LAC13, LAC14, LAC16, LAC17, LAC2, LAC3, LAC5, LAC6, LAC7, LAC8, PAL1, PAL2, PAL3, PAL4, TT10]"/>
    <att type="string" name="Associated Genes Found0" value="[AT2G22330, AT4G39950, AT5G44070, AT5G54080]"/>
    <att type="string" name="GOGroups0" value="[Group11, Group2]"/>
    <att type="string" name="GOID0" value="GO:0019439"/>
    <att type="string" name="GOLevels0" value="[4]"/>
    <att type="string" name="GOTerm0" value="aromatic compound catabolic process"/>
    <att type="string" name="Group PValue Corrected with Bonferroni0" value="{Group11=1.5686285002411636E-22, Group2=2.667419925045739E-10}"/>
    <att type="string" name="Group PValue0" value="{Group11=9.227226472006844E-24, Group2=1.5690705441445522E-11}"/>
    <att type="integer" name="Nr. Genes0" value="4"/>
    <att type="string" name="Ontology Source0" value="GO_BiologicalProcess_05.05.2011_16h22"/>
    <att type="string" name="OverViewTerm0" value="FALSE"/>
    <att type="real" name="Term PValue Corrected with Bonferroni0" value="0.10433659067927839"/>
    <att type="real" name="Term PValue0" value="7.00245575028714E-4"/>
    <att type="string" name="canonicalName" value="GO:00194390"/>
    <graphics type="ELLIPSE" h="30.0" w="30.0" x="732.0" y="1124.0" fill="#02068d" width="1" outline="#000000"/>
  </node>
  <node label="GO:00194380" id="-118">
    <att type="real" name="% Associated Genes0" value="6.435643672943115"/>
    <att type="string" name="All Associated Genes0" value="[4CL4, 4CLL1, ABCB25, AT1G01290, AT1G02860, AT1G08250, AT1G11790, AT1G12910, AT1G16540, AT1G17260, AT1G18570, AT1G22640, AT1G29410, AT1G34790, AT1G56650, AT1G69500, AT1G74710, AT1G78570, AT2G22330, AT2G27820, AT2G29690, AT2G30770, AT2G31955, AT2G36790, AT2G38470, AT2G38660, AT2G43790, AT2G47460, AT3G07630, AT3G11430, AT3G19450, AT3G24503, AT3G26830, AT3G29200, AT3G44720, AT3G45640, AT3G51240, AT3G59030, AT4G15090, AT4G22880, AT4G27070, AT4G30000, AT4G30210, AT4G34230, AT4G34510, AT4G36220, AT4G39030, AT4G39950, AT4G39980, AT5G03430, AT5G05590, AT5G05730, AT5G07990, AT5G13050, AT5G13930, AT5G20990, AT5G22630, AT5G23190, AT5G35550, AT5G44070, AT5G48150, AT5G51110, AT5G66230, ATOMT1, ATR1, At1g01280, At1g02880, At1g03160, At1g06000, At1g07780, At1g08980, At1g16490, At1g22410, At1g29410, At1g32100, At1g43620, At1g53520, At1g67980, At1g67990, At1g68540, At1g69370/F23O10_5, At1g73500/T9L24_8, At1g76730, At1g78600, At2g04400, At2g12200, At2g12280, At2g21940, At2g26310/T1D16, At2g28880, At2g29630, At2g38660, At2g44750/F16B224, At2g45300, At3g13610, At3g21500, At3g24030, At3g29590, At3g55630, At3g55870, At4g10100, At4g24670, At4g26220, At4g30000/F6G3_30, At4g33510, At4g34050, At4g35420, At4g39540/F23K16_170, At5g05270, At5g13050, At5g20990, At5g38530, At5g48930, At5g49330, At5g57850, At5g66120, At5g67160, BGLU45, BGLU46, BHLH32, BHLH4, BIG, CAD3, CAD6, CAD7, CAD8, CAD9, CHI1, CHI2, CIP7, CLA1, CM2, CTL2, CYP83B1, CYP86A1, CYP98A3, DHS2, EMB1144, F10O3, F16M2_20, F18A50, F19G100, F1I16_40, F23N20, F26K9_40, F27K19_50, F28J15, F2P3, F6G30, F6N236, F6N238, FAR4, FAR5, FLS1, FOLB1, FZL, GCR1, GLB1, GP ALPHA 1, HHT1, MEE32, METK3, METK4, MOCS2, MOCS3, MYB86, NAC012, NAC043, NFXL1, NIT1, NIT2, PAL2, PAT, POM1, Q9FI88, Q9FN53, Q9LVF5, RML1, RNS1, RTY/SUR1, T22K18, T24P22, TAA1, THFS, THI1, TSB1, TT10, TT16, TYRAAT1, TYRAAT2, UGT73B2, UGT78D1, UROS, VHA-C, ccr1, cyp81F2, dhfs/fpgs1, dhfs/fpgs2, dhfs/fpgs3, hppk/dhps2, pdl1, pdl2]"/>
    <att type="string" name="Associated Genes Found0" value="[AT1G18570, AT2G22330, AT2G30770, AT3G26830, AT3G44720, AT3G45640, AT4G27070, AT4G34230, AT4G39950, AT4G39980, AT5G05730, AT5G44070, AT5G51110]"/>
    <att type="string" name="GOGroups0" value="[Group11]"/>
    <att type="string" name="GOID0" value="GO:0019438"/>
    <att type="string" name="GOLevels0" value="[4]"/>
    <att type="string" name="GOTerm0" value="aromatic compound biosynthetic process"/>
    <att type="string" name="Group PValue Corrected with Bonferroni0" value="{Group11=1.5686285002411636E-22}"/>
    <att type="string" name="Group PValue0" value="{Group11=9.227226472006844E-24}"/>
    <att type="integer" name="Nr. Genes0" value="13"/>
    <att type="string" name="Ontology Source0" value="GO_BiologicalProcess_05.05.2011_16h22"/>
    <att type="string" name="OverViewTerm0" value="FALSE"/>
    <att type="real" name="Term PValue Corrected with Bonferroni0" value="6.292404617861266E-4"/>
    <att type="real" name="Term PValue0" value="4.223090347557897E-6"/>
    <att type="string" name="canonicalName" value="GO:00194380"/>
    <graphics type="ELLIPSE" h="50.0" w="50.0" x="664.5664672851562" y="1171.95556640625" fill="#02068d" width="1" outline="#000000"/>
  </node>
  <node label="GO:00193950" id="-117">
    <att type="real" name="% Associated Genes0" value="15.789473533630371"/>
    <att type="string" name="All Associated Genes0" value="[AT1G03000, AT1G06290, AT1G72970, AT1G79810, AT2G26350, AT3G07560, AT3G51840, AT4G16760, AT5G25760, AT5G65110, At3g01420/T13O15, At3g05290, At5g27520, At5g42890, ECH2, MFP2, PED1, PEX1, PEX12]"/>
    <att type="string" name="Associated Genes Found0" value="[AT3G51840, AT4G16760, AT5G65110]"/>
    <att type="string" name="GOGroups0" value="[Group11, Group2]"/>
    <att type="string" name="GOID0" value="GO:0019395"/>
    <att type="string" name="GOLevels0" value="[4, 5, 6, 7, 8]"/>
    <att type="string" name="GOTerm0" value="fatty acid oxidation"/>
    <att type="string" name="Group PValue Corrected with Bonferroni0" value="{Group11=1.5686285002411636E-22, Group2=2.667419925045739E-10}"/>
    <att type="string" name="Group PValue0" value="{Group11=9.227226472006844E-24, Group2=1.5690705441445522E-11}"/>
    <att type="integer" name="Nr. Genes0" value="3"/>
    <att type="string" name="Ontology Source0" value="GO_BiologicalProcess_05.05.2011_16h22"/>
    <att type="string" name="OverViewTerm0" value="FALSE"/>
    <att type="real" name="Term PValue Corrected with Bonferroni0" value="0.3079614602568286"/>
    <att type="real" name="Term PValue0" value="0.0020668554379652923"/>
    <att type="string" name="canonicalName" value="GO:00193950"/>
    <graphics type="ELLIPSE" h="30.0" w="30.0" x="533.0" y="646.0" fill="#02068d" width="1" outline="#000000"/>
  </node>
  <node label="GO:00163110" id="-116">
    <att type="real" name="% Associated Genes0" value="6.756756782531738"/>
    <att type="string" name="All Associated Genes0" value="[AIP1, AT1G64040, AT2G20050, AT2G29400, AT2G39840, AT2G42810, AT3G17790, AT3G23610, AT3G44620, AT4G26080, AT5G11860, AT5G19280, AT5G51760, AT5G57050, AT5G59160, At1g07160, At1g22280, At1g43900, At1g47510, At1g48040, At1g67820, At2g20050, At2g25620, At2g29380, At2g30020, At2g33700, At2g35320/T4C15, At2g40570, At3g01510, At3g06110, At3g06110/F28L1_5, At3g06270, At3g10940, At3g12620, At3g17090, At3g17250, At3g19600, At3g23610, At3g51370, At3g51470, At3g62260, At4g31860, At4g33920, At4g38520, At5g02760, At5g06750, At5g10740, At5g24940, At5g39400/MUL8_80, At5g46410, At5g53140, At5g66080, CDC25, CPL1, CPL2, CVP2, F4F1590, F4P13, HAB1, HAB2, IP5P1, IP5P2, NP_001154720, PP2A3, PP2C5, PP2C6, PP2CA, PPC4-2, PPH1, PTP1, Q9LUG6, WIN2, dsPTP1, f4F1590]"/>
    <att type="string" name="Associated Genes Found0" value="[AT1G64040, AT2G29400, AT3G44620, AT4G26080, AT5G57050]"/>
    <att type="string" name="GOGroups0" value="[Group5]"/>
    <att type="string" name="GOID0" value="GO:0016311"/>
    <att type="string" name="GOLevels0" value="[5]"/>
    <att type="string" name="GOTerm0" value="dephosphorylation"/>
    <att type="string" name="Group PValue Corrected with Bonferroni0" value="{Group5=2.6136523534972203E-9}"/>
    <att type="string" name="Group PValue0" value="{Group5=1.5374425608807179E-10}"/>
    <att type="integer" name="Nr. Genes0" value="5"/>
    <att type="string" name="Ontology Source0" value="GO_BiologicalProcess_05.05.2011_16h22"/>
    <att type="string" name="OverViewTerm0" value="FALSE"/>
    <att type="real" name="Term PValue Corrected with Bonferroni0" value="0.5062222983022506"/>
    <att type="real" name="Term PValue0" value="0.00339746508927685"/>
    <att type="string" name="canonicalName" value="GO:00163110"/>
    <graphics type="ELLIPSE" h="30.000030517578125" w="29.9998779296875" x="864.6005859375" y="338.1068572998047" fill="#61b34b" width="1" outline="#000000"/>
  </node>
  <node label="GO:00161440" id="-115">
    <att type="real" name="% Associated Genes0" value="10.344827651977539"/>
    <att type="string" name="All Associated Genes0" value="[AT1G16400, AT1G16410, AT1G18570, AT1G24100, AT2G22330, AT3G09710, AT3G19710, AT4G13770, AT5G05260, AT5G23020, ATR1, At1g65880, CYP83B1, FMOGS-OX1, FMOGS-OX2, FMOGS-OX3, FMOGS-OX4, FMOGS-OX5, GSL-OH, IIL1, IMDH3, MAM1, RML1, RTY/SUR1, SOT16, SOT17, SOT18, T4I9, cyp81F2]"/>
    <att type="string" name="Associated Genes Found0" value="[AT1G16410, AT1G18570, AT2G22330]"/>
    <att type="string" name="GOGroups0" value="[Group11]"/>
    <att type="string" name="GOID0" value="GO:0016144"/>
    <att type="string" name="GOLevels0" value="[5, 6, 7]"/>
    <att type="string" name="GOTerm0" value="S-glycoside biosynthetic process"/>
    <att type="string" name="Group PValue Corrected with Bonferroni0" value="{Group11=1.5686285002411636E-22}"/>
    <att type="string" name="Group PValue0" value="{Group11=9.227226472006844E-24}"/>
    <att type="integer" name="Nr. Genes0" value="3"/>
    <att type="string" name="Ontology Source0" value="GO_BiologicalProcess_05.05.2011_16h22"/>
    <att type="string" name="OverViewTerm0" value="FALSE"/>
    <att type="real" name="Term PValue Corrected with Bonferroni0" value="1.0"/>
    <att type="real" name="Term PValue0" value="0.0070508987772062645"/>
    <att type="string" name="canonicalName" value="GO:00161440"/>
    <graphics type="ELLIPSE" h="30.0" w="30.0" x="734.0" y="1284.0" fill="#02068d" width="1" outline="#000000"/>
  </node>
  <node label="GO:00161430" id="-114">
    <att type="real" name="% Associated Genes0" value="8.0"/>
    <att type="string" name="All Associated Genes0" value="[ABCG36, AT1G04580, AT1G16400, AT1G16410, AT1G18570, AT1G24100, AT2G22330, AT3G09710, AT3G19710, AT4G13770, AT4G37430, AT5G05260, AT5G23020, AT5G44070, ATR1, At1g21100, At1g21120, At1g65880, At4g37400, BGLU26, CYP83B1, ESM1, ESP, F6G170, FMOGS-OX1, FMOGS-OX2, FMOGS-OX3, FMOGS-OX4, FMOGS-OX5, GSL-OH, HOL1, IIL1, IMDH3, MAM1, NIT3, NSP1, NSP2, NSP3, NSP4, NSP5, RML1, RTY/SUR1, SOT16, SOT17, SOT18, T4I9, TGG1, TGG2, TGG4, cyp81F2]"/>
    <att type="string" name="Associated Genes Found0" value="[AT1G16410, AT1G18570, AT2G22330, AT5G44070]"/>
    <att type="string" name="GOGroups0" value="[Group11]"/>
    <att type="string" name="GOID0" value="GO:0016143"/>
    <att type="string" name="GOLevels0" value="[4, 5, 6]"/>
    <att type="string" name="GOTerm0" value="S-glycoside metabolic process"/>
    <att type="string" name="Group PValue Corrected with Bonferroni0" value="{Group11=1.5686285002411636E-22}"/>
    <att type="string" name="Group PValue0" value="{Group11=9.227226472006844E-24}"/>
    <att type="integer" name="Nr. Genes0" value="4"/>
    <att type="string" name="Ontology Source0" value="GO_BiologicalProcess_05.05.2011_16h22"/>
    <att type="string" name="OverViewTerm0" value="FALSE"/>
    <att type="real" name="Term PValue Corrected with Bonferroni0" value="0.7089339515773669"/>
    <att type="real" name="Term PValue0" value="0.004757945983740718"/>
    <att type="string" name="canonicalName" value="GO:00161430"/>
    <graphics type="ELLIPSE" h="30.0" w="30.0" x="855.0" y="1317.0" fill="#02068d" width="1" outline="#000000"/>
  </node>
  <node label="GO:00161380" id="-113">
    <att type="real" name="% Associated Genes0" value="10.1694917678833"/>
    <att type="string" name="All Associated Genes0" value="[AT1G06410, AT1G16400, AT1G16410, AT1G16980, AT1G17000, AT1G18570, AT1G23870, AT1G24100, AT1G68020, AT1G78580, AT2G22330, AT2G24210, AT3G09710, AT3G19710, AT3G52340, AT4G13770, AT4G17770, AT4G27550, AT4g12430, AT4g22590, AT4g39770, AT5G05260, AT5G10100, AT5G23020, ATR1, ATTPS11, ATTPS8, At1g35910, At1g43670, At1g65880, At1g78090, At2g22190, At3g55800, At4g39770/T19P19_160, At5g51460, At5g65140, AtTPPA, CYP83B1, F16L1, FMOGS-OX1, FMOGS-OX2, FMOGS-OX3, FMOGS-OX4, FMOGS-OX5, GSL-OH, IIL1, IMDH3, MAM1, Q9FJQ1, RML1, RTY/SUR1, SOT16, SOT17, SOT18, SPP1, SPP3A, SPP3B, T4I9, cyp81F2]"/>
    <att type="string" name="Associated Genes Found0" value="[AT1G16410, AT1G18570, AT1G23870, AT1G78580, AT2G22330, AT4G17770]"/>
    <att type="string" name="GOGroups0" value="[Group11, Group3]"/>
    <att type="string" name="GOID0" value="GO:0016138"/>
    <att type="string" name="GOLevels0" value="[5, 6]"/>
    <att type="string" name="GOTerm0" value="glycoside biosynthetic process"/>
    <att type="string" name="Group PValue Corrected with Bonferroni0" value="{Group11=1.5686285002411636E-22, Group3=1.4156565253701234E-4}"/>
    <att type="string" name="Group PValue0" value="{Group11=9.227226472006844E-24, Group3=8.327391325706609E-6}"/>
    <att type="integer" name="Nr. Genes0" value="6"/>
    <att type="string" name="Ontology Source0" value="GO_BiologicalProcess_05.05.2011_16h22"/>
    <att type="string" name="OverViewTerm0" value="FALSE"/>
    <att type="real" name="Term PValue Corrected with Bonferroni0" value="0.022198431962796628"/>
    <att type="real" name="Term PValue0" value="1.489827648509841E-4"/>
    <att type="string" name="canonicalName" value="GO:00161380"/>
    <graphics type="ELLIPSE" h="49.99951171875" w="50.0" x="694.0" y="1435.0" fill="#02068d" width="1" outline="#000000"/>
  </node>
  <node label="GO:00161370" id="-112">
    <att type="real" name="% Associated Genes0" value="7.070706844329834"/>
    <att type="string" name="All Associated Genes0" value="[ABCG36, AT1G04580, AT1G06410, AT1G16400, AT1G16410, AT1G16980, AT1G17000, AT1G18570, AT1G23870, AT1G24100, AT1G68020, AT1G73370, AT1G78580, AT2G22330, AT2G24210, AT3G09710, AT3G19710, AT3G52340, AT4G13770, AT4G17770, AT4G27550, AT4G33950, AT4G37430, AT4g12430, AT4g22590, AT4g24040, AT4g39770, AT5G05260, AT5G10100, AT5G10300, AT5G23020, AT5G44070, ATR1, ATSPS2F, ATTPS11, ATTPS8, At1g04920, At1g21100, At1g21120, At1g35580, At1g35910, At1g43670, At1g65880, At1g73370, At1g78090, At2g22190, At3g03250, At3g55800, At4g02280, At4g09510, At4g37400, At4g39770/T19P19_160, At5g20280, At5g37180, At5g49190, At5g51460, At5g65140, AtTPPA, BGLU26, CWINV4, CYP83B1, ESM1, ESP, F16L1, F28M110, F6G170, F7K15_40, FBP, FMOGS-OX1, FMOGS-OX2, FMOGS-OX3, FMOGS-OX4, FMOGS-OX5, GSL-OH, HOL1, IIL1, IMDH3, MAM1, NIT3, NSP1, NSP2, NSP3, NSP4, NSP5, Q9FJQ1, RML1, RTY/SUR1, SOT16, SOT17, SOT18, SPP1, SPP3A, SPP3B, SUS1, T4I9, TGG1, TGG2, TGG4, cyp81F2]"/>
    <att type="string" name="Associated Genes Found0" value="[AT1G16410, AT1G18570, AT1G23870, AT1G78580, AT2G22330, AT4G17770, AT5G44070]"/>
    <att type="string" name="GOGroups0" value="[Group11, Group3]"/>
    <att type="string" name="GOID0" value="GO:0016137"/>
    <att type="string" name="GOLevels0" value="[4, 5]"/>
    <att type="string" name="GOTerm0" value="glycoside metabolic process"/>
    <att type="string" name="Group PValue Corrected with Bonferroni0" value="{Group11=1.5686285002411636E-22, Group3=1.4156565253701234E-4}"/>
    <att type="string" name="Group PValue0" value="{Group11=9.227226472006844E-24, Group3=8.327391325706609E-6}"/>
    <att type="integer" name="Nr. Genes0" value="7"/>
    <att type="string" name="Ontology Source0" value="GO_BiologicalProcess_05.05.2011_16h22"/>
    <att type="string" name="OverViewTerm0" value="FALSE"/>
    <att type="real" name="Term PValue Corrected with Bonferroni0" value="0.061548445254767215"/>
    <att type="real" name="Term PValue0" value="4.13076813790384E-4"/>
    <att type="string" name="canonicalName" value="GO:00161370"/>
    <graphics type="ELLIPSE" h="50.0" w="50.0" x="749.0" y="1414.0" fill="#02068d" width="1" outline="#000000"/>
  </node>
  <node label="GO:00160540" id="-111">
    <att type="real" name="% Associated Genes0" value="8.974358558654785"/>
    <att type="string" name="All Associated Genes0" value="[ALAAT1, AT1G03000, AT1G06290, AT1G06570, AT1G79440, AT1G79810, AT2G16500, AT2G22330, AT2G26350, AT3G07560, AT3G47340, AT3G51840, AT3g04520/T27C4_17, AT4G16760, AT4G34710, AT4G39660, AT4G39950, AT5G04230, AT5G13790, AT5G25760, AT5G37830, AT5G54080, AT5G62530, AT5G64813, AT5G65110, At1g02400, At1g08630, At1g32470, At1g47990, At1g60990, At1g64660/F1N193, At1g65520, At1g75980, At2g30650, At2g30660, At2g35120, At2g43400, At3g01420/T13O15, At3g05290, At3g21780, At3g22200, At4g12130, At4g29210, At4g33010, At4g39640, At4g39650, At5g27520, At5g36160, At5g42890, At5g43280, At5g46180, At5g63910, BCAT1, CHY1, CYP707A3, ECH2, ETFB, F28J1220, F28J1230, GDCSH, GDCST, MCCA, MCCB, MFP2, PAL1, PAL2, PAL3, PAL4, PED1, PEX1, PEX12, PHYLLO, POX1, POX2, Q9LQR9, SDH, dl3255c, dl3260c]"/>
    <att type="string" name="Associated Genes Found0" value="[AT2G22330, AT3G47340, AT3G51840, AT4G16760, AT4G39950, AT5G54080, AT5G65110]"/>
    <att type="string" name="GOGroups0" value="[Group11, Group2]"/>
    <att type="string" name="GOID0" value="GO:0016054"/>
    <att type="string" name="GOLevels0" value="[4]"/>
    <att type="string" name="GOTerm0" value="organic acid catabolic process"/>
    <att type="string" name="Group PValue Corrected with Bonferroni0" value="{Group11=1.5686285002411636E-22, Group2=2.667419925045739E-10}"/>
    <att type="string" name="Group PValue0" value="{Group11=9.227226472006844E-24, Group2=1.5690705441445522E-11}"/>
    <att type="integer" name="Nr. Genes0" value="7"/>
    <att type="string" name="Ontology Source0" value="GO_BiologicalProcess_05.05.2011_16h22"/>
    <att type="string" name="OverViewTerm0" value="FALSE"/>
    <att type="real" name="Term PValue Corrected with Bonferroni0" value="0.013909199035201717"/>
    <att type="real" name="Term PValue0" value="9.335032909531353E-5"/>
    <att type="string" name="canonicalName" value="GO:00160540"/>
    <graphics type="ELLIPSE" h="50.0" w="50.0" x="690.1806640625" y="894.6806640625" fill="#02068d" width="1" outline="#000000"/>
  </node>
  <node label="GO:00160530" id="-110">
    <att type="real" name="% Associated Genes0" value="5.194805145263672"/>
    <att type="string" name="All Associated Genes0" value="[20ox1, 20ox2, 20ox3, 4CLL5, 4CLL7, 4CLL9, A0MF23, ACC2, ACL1, ACP-1, AK2, AK3, AKHSDH1, AKHSDH2, ARD1, ARD2, ARD3, AT1G01480, AT1G01610, AT1G02205, AT1G02860, AT1G04580, AT1G04640, AT1G05160, AT1G06080, AT1G07720, AT1G08250, AT1G11790, AT1G13280, AT1G14520, AT1G15550, AT1G16540, AT1G17745, AT1G19640, AT1G29410, AT1G30100, AT1G49430, AT1G51500, AT1G52340, AT1G53000, AT1G55020, AT1G55920, AT1G62180, AT1G73250, AT1G74710, AT1G76690, AT1G78390, AT1G80340, AT2G14750, AT2G15090, AT2G16370, AT2G18950, AT2G19800, AT2G22330, AT2G22810, AT2G26310, AT2G27150, AT2G27820, AT2G28630, AT2G29690, AT2G29980, AT2G31360, AT2G31810, AT2G32440, AT2G38110, AT2G39800, AT2G43090, AT2G43360, AT2G44810, AT2G45690, AT3G02580, AT3G07630, AT3G14440, AT3G15850, AT3G23940, AT3G24220, AT3G25760, AT3G25770, AT3G25780, AT3G25900, AT3G29200, AT3G44720, AT3G47340, AT3G49700, AT3G54010, AT3G59970, AT3G63250, AT4G00400, AT4G02780, AT4G04610, AT4G08040, AT4G11280, AT4G14720, AT4G14910, AT4G16760, AT4G18350, AT4G21990, AT4G22753, AT4G26200, AT4G26260, AT4G26483, AT4G26850, AT4G27070, AT4G29010, AT4G33950, AT4G34510, AT4G34570, AT4G36220, AT4G37770, AT4G39030, AT4G39940, AT4G39950, AT4G39980, AT4g13050, AT4g34200, AT5G03730, AT5G05590, AT5G05730, AT5G05920, AT5G10160, AT5G10240, AT5G10480, AT5G10920, AT5G13280, AT5G13520, AT5G15530, AT5G20960, AT5G22630, AT5G23020, AT5G23190, AT5G27380, AT5G37300, AT5G42650, AT5G43850, AT5G46240, AT5G46290, AT5G48150, AT5G49070, AT5G55120, AT5G56640, AT5G57800, AT5G64813, AT5G65010, AT5G65800, AT5G66230, ATR1, ATS1, ATSERAT1, ATSERAT2, A_TM021B04, At1g01280, At1g02205, At1g06090, At1g06100, At1g06120, At1g06350, At1g06360, At1g07420, At1g07780, At1g08510/T27G79, At1g08980, At1g09795/F21M129, At1g10670, At1g13950, At1g14290, At1g14810, At1g17745, At1g22410, At1g24360, At1g26630, At1g29410, At1g30120, At1g31860, At1g32440, At1g44090, At1g47578, At1g53520, At1g57750, At1g61850, At1g62640, At1g63660, At1g65290, At1g66200, At1g67070, At1g67080, At1g67730, At1g68320, At1g69370/F23O10_5, At1g69410, At1g69640, At1g79750, At1g79900, At1g80330, At1g80555, At2g03667, At2g04400, At2g05830, At2g05990, At2g14060, At2g17265, At2g17630, At2g19940, At2g21550, At2g21940, At2g22230, At2g22910, At2g26310, At2g26310/T1D16, At2g26560/T9J223, At2g28880, At2g29390, At2g30200, At2g31810, At2g37250, At2g37500, At2g37700, At2g44620, At2g45300, At2g46110, At2g46210, At3g03630, At3g10030, At3g12990, At3g18680, At3g19480, At3g22425, At3g22460, At3g23940, At3g25110, At3g45770, At3g53180/T4D210, At3g55610, At3g55870, At3g57050, At3g58180, At3g58610, At4g04320, At4g12110, At4g14710, At4g14910, At4g22753, At4g22756, At4g24670, At4g24830, At4g26900, At4g30550, At4g33510, At4g35630, At4g39540/F23K16_170, At5g04620, At5g05270, At5g10330, At5g16290, At5g20980, At5g21060, At5g28840, At5g38020, At5g38530, At5g46180, At5g47630, At5g48840, At5g50210, At5g52570, At5g52920, At5g53850, At5g55240, At5g57590, At5g57850, At5g61780, At5g65010, At5g66120, At5g67030, At5g67160, AtATP-PRT1, AtcysD2, BCAT2, BCAT3, BCAT5, BCAT6, BIG, CAC1, CAC2, CAC3, CARB, CER1-like, CHI1, CHI2, CIMS, CM2, CSR 1, CTIMC, CYP20-3, CYP83B1, Cyt ACS 1, DAP, DAPB1, DAPB2, DAPB3, DAPF, DCR, DGL, DHDPS1, DHDPS2, DHS2, EMB1144, F10M2370, F13M2390, F16M2_20, F18K105, F19F1860, F27K19_50, F2A1930, F3O94, F6I180, FAB1, FAD2, FAD6, FAD7, FAD8, FAR3, FLU, FOLB1, GA2, GCN2, GCR1, GLN1-1, GLN1-2, GLN1-3, GLN1-4, GLN1-5, GLT1, GLU1, GLU2, GP ALPHA 1, GS2, HDF7, HDH, HIS6, HMT3, HPA2, IIL1, IMDH1, IMDH2, IMDH3, IMPL2, IMS1, IPMS1, KAS, KAS1, KAT5, KCS1, KCS10, KCS11, KCS13, KCS14, KCS16, KCS18, KCS19, KCS2, KCS20, KCS21, KCS4, KCS5, KCS6, KCS7, KCS9, KIN10, KIN11, KINB1, KINB2, KING1, KO1, L73G190, LACS1, LIP2p, LOX2, LOX3, LOX4, LOX5, LOX6, LYSA1, LYSA2, MEE32, METK3, METK4, MTK, MTN1, MTN2, MTO1, NAGK, NAS1, NAS2, NAS3, NAS4, NFXL1, NIT1, NIT2, NP_001078324, OASA1, OASB, OASC, OMR1, OPR1, OPR3, OTC, P5CSA, P5CSB, PAT, PED1, PMM, POX1, POX2, PROC1, PSP, Q41907, Q42021, Q8LF92, Q9LG24, Q9LQU9, Q9LQY8, Q9SKV1, RML1, RTY/SUR1, S-ACP-DES1, S-ACP-DES2, S-ACP-DES3, S-ACP-DES4, S-ACP-DES5, S-ACP-DES6, SAM1, SAM2, SAT2, SAT4, SMO, SSI2, T13K140, T16L160, T19B17, T1E22_60, T1J1, T22E16, T24P22, T31P16_230, T4D210, T9J141, TAA1, TS1, TS2, TSB1, TYRAAT1, TYRAAT2, UROS, VTC4, WIN1, Z973356, accD, atms2, cer2, cyt1, hsr1, oas5, sld1]"/>
    <att type="string" name="Associated Genes Found0" value="[AT1G02205, AT1G07720, AT1G17745, AT1G51500, AT2G22330, AT3G15850, AT3G25780, AT3G44720, AT3G47340, AT3G59970, AT4G00400, AT4G11280, AT4G16760, AT4G21990, AT4G27070, AT4G39950, AT4G39980, AT5G05730, AT5G10160, AT5G10240, AT5G10480, AT5G20960, AT5G46240, AT5G65010]"/>
    <att type="string" name="GOGroups0" value="[Group2]"/>
    <att type="string" name="GOID0" value="GO:0016053"/>
    <att type="string" name="GOLevels0" value="[4]"/>
    <att type="string" name="GOTerm0" value="organic acid biosynthetic process"/>
    <att type="string" name="Group PValue Corrected with Bonferroni0" value="{Group2=2.667419925045739E-10}"/>
    <att type="string" name="Group PValue0" value="{Group2=1.5690705441445522E-11}"/>
    <att type="integer" name="Nr. Genes0" value="24"/>
    <att type="string" name="Ontology Source0" value="GO_BiologicalProcess_05.05.2011_16h22"/>
    <att type="string" name="OverViewTerm0" value="FALSE"/>
    <att type="real" name="Term PValue Corrected with Bonferroni0" value="3.2778375907244935E-6"/>
    <att type="real" name="Term PValue0" value="2.199891000486237E-8"/>
    <att type="string" name="canonicalName" value="GO:00160530"/>
    <graphics type="ELLIPSE" h="50.0" w="50.00001525878906" x="239.48534393310547" y="499.4228515625" fill="#4d1a74" width="1" outline="#000000"/>
  </node>
  <node label="GO:00160510" id="-109">
    <att type="real" name="% Associated Genes0" value="4.661016941070557"/>
    <att type="string" name="All Associated Genes0" value="[AT1G02730, AT1G05570, AT1G06410, AT1G11720, AT1G16400, AT1G16410, AT1G16980, AT1G17000, AT1G18570, AT1G19300, AT1G23870, AT1G24100, AT1G25210, AT1G27680, AT1G30620, AT1G53000, AT1G53500, AT1G68020, AT1G73250, AT1G76890, AT1G78240, AT1G78570, AT1G78580, AT2G13680, AT2G20370, AT2G22330, AT2G24210, AT2G28110, AT2G37090, AT3G08550, AT3G09710, AT3G14570, AT3G14790, AT3G19710, AT3G20480, AT3G25140, AT3G52340, AT3G61130, AT4G13770, AT4G17770, AT4G27550, AT4G38190, AT4G39210, AT4g12430, AT4g22590, AT4g39770, AT5G05260, AT5G10100, AT5G10160, AT5G19220, AT5G23020, AT5G24810, AT5G33290, AT5G48300, AT5G54690, AT5g24810;F6A40, ATCSLD1, ATCSLD6, ATCSLE1, ATCSLG1, ATCSLG2, ATCSLG3, ATGH9A1, ATR1, ATTPS11, ATTPS8, At1g10670, At1g13440, At1g24793, At1g25054, At1g32060, At1g35910, At1g43620, At1g43670, At1g56190, At1g63680, At1g64440, At1g65880, At1g71100, At1g73740/F25P226, At1g78090, At2g04560, At2g05320, At2g21590, At2g22190, At2g22230, At2g22240, At2g32700, At2g35100, At2g35610, At2g40690, At3g01180/T4P133, At3g02230, At3g07020, At3g08840/T16O11_23, At3g20480, At3g24090, At3g55800, At3g57220, At4g00560, At4g18240, At4g24620, At4g39770/T19P19_160, At4g39800, At5g01360, At5g06700, At5g10170, At5g16510, At5g24300, At5g51460, At5g63840, At5g64380, At5g65140, At5g65690, At5g66680, At5g67210, AtTPPA, B3GALT15, CALS1, CALS10, CALS11, CALS12, CALS2, CALS3, CALS4, CALS6, CALS7, CALS8, CALS9, CESA1, CESA10, CESA2, CESA4, CESA5, CESA6, CESA9, CEV1, CSLB1, CSLB2, CSLB3, CSLB4, CSLB5, CSLB6, CSLD2, CSLD3, CTIMC, CYP83B1, F11C1_60, F16L1, F3F20, F3O94, F6N237, F8H, FBP, FMOGS-OX1, FMOGS-OX2, FMOGS-OX3, FMOGS-OX4, FMOGS-OX5, FUT1, FUT13, GAPA, GAPB, GAPC, GID1A, GID1B, GID1C, GSL-OH, HHT1, IIL1, IMDH3, IRX1, IRX10, IRX10L, IRX14, IRX14H, IRX3, IRX9H, ISA1, ISA2, KDSA, MAM1, MUR1, NP_001154712, NP_173888, NP_196804, NRS/ER, PCKA, PGIC, PGK1, PGMP, PGSIP1, PIGM, PMM, PU1, Q42189, Q500V1, Q9FJQ1, Q9LMZ6, Q9LQH8, QQS, RBCS-1A, RBCS-1B, RBCS-2B, RBCS-3B, RGP2, RGP4, RML1, RTY/SUR1, SBE2, SOT16, SOT17, SOT18, SPP1, SPP3A, SPP3B, SSIII, Sbe2, T12C14_110, T15B16, T16O113, T16O114, T16O116, T21B142, T4I9, T9A210, T9J146, TIM, TPST, VTC4, WAXY, XXT1, cyp81F2, cyt1, gnTII, rbcL]"/>
    <att type="string" name="Associated Genes Found0" value="[AT1G05570, AT1G16410, AT1G18570, AT1G19300, AT1G23870, AT1G78580, AT2G22330, AT4G17770, AT5G10160, AT5G19220, AT5G33290]"/>
    <att type="string" name="GOGroups0" value="[Group11, Group3]"/>
    <att type="string" name="GOID0" value="GO:0016051"/>
    <att type="string" name="GOLevels0" value="[3, 4]"/>
    <att type="string" name="GOTerm0" value="carbohydrate biosynthetic process"/>
    <att type="string" name="Group PValue Corrected with Bonferroni0" value="{Group11=1.5686285002411636E-22, Group3=1.4156565253701234E-4}"/>
    <att type="string" name="Group PValue0" value="{Group11=9.227226472006844E-24, Group3=8.327391325706609E-6}"/>
    <att type="integer" name="Nr. Genes0" value="11"/>
    <att type="string" name="Ontology Source0" value="GO_BiologicalProcess_05.05.2011_16h22"/>
    <att type="string" name="OverViewTerm0" value="FALSE"/>
    <att type="real" name="Term PValue Corrected with Bonferroni0" value="0.06120156504204792"/>
    <att type="real" name="Term PValue0" value="4.1074875867146257E-4"/>
    <att type="string" name="canonicalName" value="GO:00160510"/>
    <graphics type="ELLIPSE" h="50.00048828125" w="50.0" x="657.0" y="1491.0" fill="#02068d" width="1" outline="#000000"/>
  </node>
  <node label="GO:00160360" id="-108">
    <att type="real" name="% Associated Genes0" value="4.44444465637207"/>
    <att type="string" name="All Associated Genes0" value="[AT1G27320, AT2G11810, AT2G33770, AT3G04530, AT3G16785, AT3G23430, AT3G62980, AT4G00550, AT4G33030, AT5G20410, AT5G60410, At1g13300, At1g23010/F19G10_5, At1g68320, At2g22240, At3g03250, At3g03520, At3g09922, At3g27740, At5g21040, At5g23630, At5g42870, BGLU21, BHLH32, CARB, CAT1, CAT2, F11F8_14, PAP12, PCKA, PHF1, PHO1-H1, PHT1-1, PHT1-2, PLDEPSILON, PLDP2, PS2, PYRB, PYRE-F, SPX2, SPX3, T21P5, UPP, WOL, WRKY6]"/>
    <att type="string" name="Associated Genes Found0" value="[AT2G33770, AT3G16785]"/>
    <att type="string" name="GOGroups0" value="[Group1, Group12]"/>
    <att type="string" name="GOID0" value="GO:0016036"/>
    <att type="string" name="GOLevels0" value="[5, 6, 7]"/>
    <att type="string" name="GOTerm0" value="cellular response to phosphate starvation"/>
    <att type="string" name="Group PValue Corrected with Bonferroni0" value="{Group1=0.11288642812032629, Group12=0.17002625782107086}"/>
    <att type="string" name="Group PValue0" value="{Group1=0.0066403781247250755, Group12=0.010001544577710051}"/>
    <att type="integer" name="Nr. Genes0" value="2"/>
    <att type="string" name="Ontology Source0" value="GO_BiologicalProcess_05.05.2011_16h22"/>
    <att type="string" name="OverViewTerm0" value="FALSE"/>
    <att type="real" name="Term PValue Corrected with Bonferroni0" value="1.0"/>
    <att type="real" name="Term PValue0" value="0.12543603787580748"/>
    <att type="string" name="canonicalName" value="GO:00160360"/>
    <graphics type="ELLIPSE" h="30.0" w="29.999988555908203" x="49.88930320739746" y="1291.15869140625" fill="#1cf83d" width="1" outline="#000000"/>
  </node>
  <node label="GO:00159960" id="-107">
    <att type="real" name="% Associated Genes0" value="20.0"/>
    <att type="string" name="All Associated Genes0" value="[AT3G44880, AT4G37000, AT5G13800, CLH1, CLH2, ETFB, F7H1900, NOL, NYC1, PPD]"/>
    <att type="string" name="Associated Genes Found0" value="[AT3G44880, AT5G13800]"/>
    <att type="string" name="GOGroups0" value="[Group11, Group17, Group8]"/>
    <att type="string" name="GOID0" value="GO:0015996"/>
    <att type="string" name="GOLevels0" value="[4, 6, 7]"/>
    <att type="string" name="GOTerm0" value="chlorophyll catabolic process"/>
    <att type="string" name="Group PValue Corrected with Bonferroni0" value="{Group11=1.5686285002411636E-22, Group17=0.0032000058459379366, Group8=1.9149650656212817E-4}"/>
    <att type="string" name="Group PValue0" value="{Group11=9.227226472006844E-24, Group17=1.8823563799634922E-4, Group8=1.126450038600754E-5}"/>
    <att type="integer" name="Nr. Genes0" value="2"/>
    <att type="string" name="Ontology Source0" value="GO_BiologicalProcess_05.05.2011_16h22"/>
    <att type="string" name="OverViewTerm0" value="FALSE"/>
    <att type="real" name="Term PValue Corrected with Bonferroni0" value="1.0"/>
    <att type="real" name="Term PValue0" value="0.007759255761273985"/>
    <att type="string" name="canonicalName" value="GO:00159960"/>
    <graphics type="ELLIPSE" h="30.0" w="30.0" x="1253.0" y="1086.0" fill="#02068d" width="1" outline="#000000"/>
  </node>
  <node label="GO:00159940" id="-106">
    <att type="real" name="% Associated Genes0" value="4.081632614135742"/>
    <att type="string" name="All Associated Genes0" value="[AT2G20180, AT3G44880, AT3G56940, AT4G25080, AT4G37000, AT5G13800, AT5G54190, At1g10670, At1g78600, At2g40490, At3g14930, At5g13630, At5g18660, At5g45930, CAO, CHLD, CHLI, CHLP, CIP7, CLA1, CLH1, CLH2, CRD1, ETFB, F13M2320, F7H1900, FLU, G4, GSA1, GSA2, GUN4, HEMA1, HEMA2, HEMB, HEMC, IPP1, IPP2, ISPF, NOL, NYC1, PDX13, POR C, PORB, PPD, PPOX, SOX, UROS, VDE1, VTE1]"/>
    <att type="string" name="Associated Genes Found0" value="[AT3G44880, AT5G13800]"/>
    <att type="string" name="GOGroups0" value="[Group11, Group17, Group8]"/>
    <att type="string" name="GOID0" value="GO:0015994"/>
    <att type="string" name="GOLevels0" value="[5, 6]"/>
    <att type="string" name="GOTerm0" value="chlorophyll metabolic process"/>
    <att type="string" name="Group PValue Corrected with Bonferroni0" value="{Group11=1.5686285002411636E-22, Group17=0.0032000058459379366, Group8=1.9149650656212817E-4}"/>
    <att type="string" name="Group PValue0" value="{Group11=9.227226472006844E-24, Group17=1.8823563799634922E-4, Group8=1.126450038600754E-5}"/>
    <att type="integer" name="Nr. Genes0" value="2"/>
    <att type="string" name="Ontology Source0" value="GO_BiologicalProcess_05.05.2011_16h22"/>
    <att type="string" name="OverViewTerm0" value="FALSE"/>
    <att type="real" name="Term PValue Corrected with Bonferroni0" value="1.0"/>
    <att type="real" name="Term PValue0" value="0.14396568768788084"/>
    <att type="string" name="canonicalName" value="GO:00159940"/>
    <graphics type="ELLIPSE" h="30.0" w="30.0" x="1283.0" y="1138.0" fill="#02068d" width="1" outline="#000000"/>
  </node>
  <node label="GO:00157110" id="-105">
    <att type="real" name="% Associated Genes0" value="12.5"/>
    <att type="string" name="All Associated Genes0" value="[AT1G12480, AT5G01340, AT5G12860, AT5G46110, AT5G49630, At2g01170, At2g26900, At2g34960, At4g21120, FRD3, GPT1, GPT2, NIP2-1, PPT1, PPT2, XPT]"/>
    <att type="string" name="Associated Genes Found0" value="[AT5G12860, AT5G46110]"/>
    <att type="string" name="GOGroups0" value="[Group12]"/>
    <att type="string" name="GOID0" value="GO:0015711"/>
    <att type="string" name="GOLevels0" value="[5, 6]"/>
    <att type="string" name="GOTerm0" value="organic anion transport"/>
    <att type="string" name="Group PValue Corrected with Bonferroni0" value="{Group12=0.17002625782107086}"/>
    <att type="string" name="Group PValue0" value="{Group12=0.010001544577710051}"/>
    <att type="integer" name="Nr. Genes0" value="2"/>
    <att type="string" name="Ontology Source0" value="GO_BiologicalProcess_05.05.2011_16h22"/>
    <att type="string" name="OverViewTerm0" value="FALSE"/>
    <att type="real" name="Term PValue Corrected with Bonferroni0" value="1.0"/>
    <att type="real" name="Term PValue0" value="0.019609037702119848"/>
    <att type="string" name="canonicalName" value="GO:00157110"/>
    <graphics type="ELLIPSE" h="30.0" w="29.999958038330078" x="70.6832332611084" y="1353.6259765625" fill="#c822aa" width="1" outline="#000000"/>
  </node>
  <node label="GO:00106480" id="-104">
    <att type="real" name="% Associated Genes0" value="10.256410598754883"/>
    <att type="string" name="All Associated Genes0" value="[AHL25, AIP2, AT1G14920, AT1G50640, AT1G66340, AT1G66350, AT2G01570, AT2G25490, AT3G02140, AT3G03450, AT3G11540, AT3G15210, AT3G48040, AT3G59380, AT4G01060, AT4G26080, AT5G01810, AT5G03730, AT5G08335, AT5G10720, AT5G23320, AT5G25350, AT5G57050, AT5G64750, ATHB-6, At2g26070, At2g39550, DOR, DWA1, DWA2, EIN4, ERS1, ERS2, ETR2, GLIP2, NAC002, PKL, PP2CA, SAL1]"/>
    <att type="string" name="Associated Genes Found0" value="[AT2G25490, AT4G01060, AT4G26080, AT5G57050]"/>
    <att type="string" name="GOGroups0" value="[Group11, Group5]"/>
    <att type="string" name="GOID0" value="GO:0010648"/>
    <att type="string" name="GOLevels0" value="[5]"/>
    <att type="string" name="GOTerm0" value="negative regulation of cell communication"/>
    <att type="string" name="Group PValue Corrected with Bonferroni0" value="{Group11=1.5686285002411636E-22, Group5=2.6136523534972203E-9}"/>
    <att type="string" name="Group PValue0" value="{Group11=9.227226472006844E-24, Group5=1.5374425608807179E-10}"/>
    <att type="integer" name="Nr. Genes0" value="4"/>
    <att type="string" name="Ontology Source0" value="GO_BiologicalProcess_05.05.2011_16h22"/>
    <att type="string" name="OverViewTerm0" value="FALSE"/>
    <att type="real" name="Term PValue Corrected with Bonferroni0" value="0.2845191509556112"/>
    <att type="real" name="Term PValue0" value="0.0019095245030577932"/>
    <att type="string" name="canonicalName" value="GO:00106480"/>
    <graphics type="ELLIPSE" h="29.99993896484375" w="30.0" x="798.46875" y="719.5686340332031" fill="#02068d" width="1" outline="#000000"/>
  </node>
  <node label="GO:00106460" id="-103">
    <att type="real" name="% Associated Genes0" value="7.5757575035095215"/>
    <att type="string" name="All Associated Genes0" value="[AHL25, AIP2, AT1G14920, AT1G50640, AT1G66340, AT1G66350, AT2G01570, AT2G25490, AT3G02140, AT3G03450, AT3G11540, AT3G15210, AT3G48040, AT3G50500, AT3G55530, AT3G59380, AT4G01060, AT4G09570, AT4G26080, AT5G01810, AT5G03730, AT5G06100, AT5G08335, AT5G10720, AT5G23320, AT5G25350, AT5G57050, AT5G64750, AT5G66880, ATCDPK2, ATHB-6, At1g04450, At2g26070, At2g32460, At2g39550, At4g23450, At5g18200, BGLU18, DOR, DWA1, DWA2, EIN2, EIN4, ERS1, ERS2, ETR2, GAT1, GID1A, GID1B, GID1C, GLIP2, GP ALPHA 1, MMS21, NAC002, NUDT6, PED1, PKL, PLDALPHA1, PP2AA1, PP2CA, PYL8, RHA2A, SAL1, SPX3, SSP, TTL1]"/>
    <att type="string" name="Associated Genes Found0" value="[AT2G25490, AT3G50500, AT4G01060, AT4G26080, AT5G57050]"/>
    <att type="string" name="GOGroups0" value="[Group11, Group16, Group5]"/>
    <att type="string" name="GOID0" value="GO:0010646"/>
    <att type="string" name="GOLevels0" value="[4]"/>
    <att type="string" name="GOTerm0" value="regulation of cell communication"/>
    <att type="string" name="Group PValue Corrected with Bonferroni0" value="{Group11=1.5686285002411636E-22, Group16=6.128750210897452E-6, Group5=2.6136523534972203E-9}"/>
    <att type="string" name="Group PValue0" value="{Group11=9.227226472006844E-24, Group16=3.605147182880854E-7, Group5=1.5374425608807179E-10}"/>
    <att type="integer" name="Nr. Genes0" value="5"/>
    <att type="string" name="Ontology Source0" value="GO_BiologicalProcess_05.05.2011_16h22"/>
    <att type="string" name="OverViewTerm0" value="FALSE"/>
    <att type="real" name="Term PValue Corrected with Bonferroni0" value="0.30662234836349855"/>
    <att type="real" name="Term PValue0" value="0.002057868109822138"/>
    <att type="string" name="canonicalName" value="GO:00106460"/>
    <graphics type="ELLIPSE" h="30.00006103515625" w="30.0" x="804.2011108398438" y="829.0710144042969" fill="#02068d" width="1" outline="#000000"/>
  </node>
  <node label="GO:00106380" id="-102">
    <att type="real" name="% Associated Genes0" value="9.523809432983398"/>
    <att type="string" name="All Associated Genes0" value="[AMSH3, ASHH2, AT1G29170, AT1G57820, AT1G66050, AT1G73840, AT2G22640, AT2G29890, AT2G34150, AT5G18410, AT5G39550, At2g46225, CHR1, FH3, FH5, FH8, MAP65-1, MAP65-6, NAP1, SCAR2, SCAR4]"/>
    <att type="string" name="Associated Genes Found0" value="[AT1G73840, AT5G18410]"/>
    <att type="string" name="GOGroups0" value="[Group6, Group9]"/>
    <att type="string" name="GOID0" value="GO:0010638"/>
    <att type="string" name="GOLevels0" value="[5]"/>
    <att type="string" name="GOTerm0" value="positive regulation of organelle organization"/>
    <att type="string" name="Group PValue Corrected with Bonferroni0" value="{Group6=0.005947125430452599, Group9=0.011180158214547965}"/>
    <att type="string" name="Group PValue0" value="{Group6=3.498309076736823E-4, Group9=6.57656365561645E-4}"/>
    <att type="integer" name="Nr. Genes0" value="2"/>
    <att type="string" name="Ontology Source0" value="GO_BiologicalProcess_05.05.2011_16h22"/>
    <att type="string" name="OverViewTerm0" value="FALSE"/>
    <att type="real" name="Term PValue Corrected with Bonferroni0" value="1.0"/>
    <att type="real" name="Term PValue0" value="0.03282257061311215"/>
    <att type="string" name="canonicalName" value="GO:00106380"/>
    <graphics type="ELLIPSE" h="30.00006103515625" w="29.9998779296875" x="1775.3638305664062" y="637.4157409667969" fill="#6eee80" width="1" outline="#000000"/>
  </node>
  <node label="GO:00106280" id="-101">
    <att type="real" name="% Associated Genes0" value="5.063291072845459"/>
    <att type="string" name="All Associated Genes0" value="[AT1G21600, AT1G28300, AT1G45249, AT1G62180, AT1G69120, AT2G20570, AT2G36270, AT2G36490, AT2G42680, AT3G01470, AT3G11440, AT3G24140, AT3G24500, AT3G26744, AT3G58680, AT3G60390, AT3G61890, AT4G40060, AT5G06100, AT5G08565, AT5G22220, AT5G22260, AT5G44190, AT5G47220, AT5G65310, ATHB-51, ATHB-6, ATHSFA2, At1g25540, At1g61040, At1g71930, At1g73500/T9L24_8, At2g02540, At2g32460, At2g34640, At2g35530, At3g10800, At5g08565, At5g62380, At5g63670, BHLH54, BRN1, BRN2, CPL2, DOF3, DOF5, DPBF2, E2FA, ELF8, F24M1200, F27K19_170, GATA12, GATA2, GATA3, GATA4, GATA5, GATA6, GATA7, GATA8, GATA9, GCN5, NAC012, NAC043, NAC066, NAC078, NAC69, NFYB6, NFYB9, NFYC1, NFYC2, NPR6, NP_182035, PTAC2, RAP1, SCL14, T18I3, WRKY53, ZAP1, sig]"/>
    <att type="string" name="Associated Genes Found0" value="[AT2G42680, AT3G60390, AT3G61890, AT5G44190]"/>
    <att type="string" name="GOGroups0" value="[Group6]"/>
    <att type="string" name="GOID0" value="GO:0010628"/>
    <att type="string" name="GOLevels0" value="[6]"/>
    <att type="string" name="GOTerm0" value="positive regulation of gene expression"/>
    <att type="string" name="Group PValue Corrected with Bonferroni0" value="{Group6=0.005947125430452599}"/>
    <att type="string" name="Group PValue0" value="{Group6=3.498309076736823E-4}"/>
    <att type="integer" name="Nr. Genes0" value="4"/>
    <att type="string" name="Ontology Source0" value="GO_BiologicalProcess_05.05.2011_16h22"/>
    <att type="string" name="OverViewTerm0" value="FALSE"/>
    <att type="real" name="Term PValue Corrected with Bonferroni0" value="1.0"/>
    <att type="real" name="Term PValue0" value="0.022890583282604793"/>
    <att type="string" name="canonicalName" value="GO:00106280"/>
    <graphics type="ELLIPSE" h="29.99993896484375" w="29.9998779296875" x="1573.1004028320312" y="897.8849792480469" fill="#6eee80" width="1" outline="#000000"/>
  </node>
  <node label="GO:00106040" id="-100">
    <att type="real" name="% Associated Genes0" value="5.15463924407959"/>
    <att type="string" name="All Associated Genes0" value="[ASHH2, AT1G21600, AT1G28300, AT1G45249, AT1G62180, AT1G69120, AT2G20570, AT2G23430, AT2G36270, AT2G36490, AT2G42680, AT3G01470, AT3G08720, AT3G08730, AT3G11440, AT3G24140, AT3G24500, AT3G26744, AT3G58680, AT3G60390, AT3G61890, AT4G40060, AT5G06100, AT5G08565, AT5G22220, AT5G22260, AT5G44190, AT5G47220, AT5G65310, ATHB-51, ATHB-6, ATHSFA2, At1g13950, At1g25540, At1g26630, At1g43860/F28H191, At1g61040, At1g69410, At1g71930, At1g73500/T9L24_8, At2g02540, At2g32460, At2g34210, At2g34640, At2g35530, At3g09210, At3g10800, At4g08350, At5g08565, At5g62380, At5g63670, BHLH54, BRN1, BRN2, CHR1, CPL2, DOF3, DOF5, DPBF2, E2FA, ELF8, ERABP1, F18K100, F24M1200, F27K19_170, FZR1, GATA12, GATA2, GATA3, GATA4, GATA5, GATA6, GATA7, GATA8, GATA9, GCN5, INO80, NAC012, NAC043, NAC066, NAC078, NAC69, NFYB6, NFYB9, NFYC1, NFYC2, NPR6, NP_182035, PTAC2, Q42021, RAP1, REP, SCL14, T18I3, WRKY53, ZAP1, sig]"/>
    <att type="string" name="Associated Genes Found0" value="[AT2G42680, AT3G08720, AT3G60390, AT3G61890, AT5G44190]"/>
    <att type="string" name="GOGroups0" value="[Group6]"/>
    <att type="string" name="GOID0" value="GO:0010604"/>
    <att type="string" name="GOLevels0" value="[5]"/>
    <att type="string" name="GOTerm0" value="positive regulation of macromolecule metabolic process"/>
    <att type="string" name="Group PValue Corrected with Bonferroni0" value="{Group6=0.005947125430452599}"/>
    <att type="string" name="Group PValue0" value="{Group6=3.498309076736823E-4}"/>
    <att type="integer" name="Nr. Genes0" value="5"/>
    <att type="string" name="Ontology Source0" value="GO_BiologicalProcess_05.05.2011_16h22"/>
    <att type="string" name="OverViewTerm0" value="FALSE"/>
    <att type="real" name="Term PValue Corrected with Bonferroni0" value="1.0"/>
    <att type="real" name="Term PValue0" value="0.010573781187021892"/>
    <att type="string" name="canonicalName" value="GO:00106040"/>
    <graphics type="ELLIPSE" h="30.00006103515625" w="30.000244140625" x="1674.7196044921875" y="721.6632385253906" fill="#6eee80" width="1" outline="#000000"/>
  </node>
  <node label="GO:00105570" id="-99">
    <att type="real" name="% Associated Genes0" value="5.617977619171143"/>
    <att type="string" name="All Associated Genes0" value="[AT1G21600, AT1G28300, AT1G45249, AT1G62180, AT1G69120, AT2G20570, AT2G23430, AT2G36270, AT2G36490, AT2G42680, AT3G01470, AT3G08720, AT3G08730, AT3G11440, AT3G24140, AT3G24500, AT3G26744, AT3G58680, AT3G60390, AT3G61890, AT4G40060, AT5G06100, AT5G08565, AT5G22220, AT5G22260, AT5G44190, AT5G47220, AT5G65310, ATHB-51, ATHB-6, ATHSFA2, At1g13950, At1g25540, At1g26630, At1g43860/F28H191, At1g61040, At1g69410, At1g71930, At1g73500/T9L24_8, At2g02540, At2g32460, At2g34640, At2g35530, At3g10800, At5g08565, At5g62380, At5g63670, BHLH54, BRN1, BRN2, CPL2, DOF3, DOF5, DPBF2, E2FA, ELF8, ERABP1, F18K100, F24M1200, F27K19_170, FZR1, GATA12, GATA2, GATA3, GATA4, GATA5, GATA6, GATA7, GATA8, GATA9, GCN5, NAC012, NAC043, NAC066, NAC078, NAC69, NFYB6, NFYB9, NFYC1, NFYC2, NPR6, NP_182035, PTAC2, Q42021, RAP1, SCL14, WRKY53, ZAP1, sig]"/>
    <att type="string" name="Associated Genes Found0" value="[AT2G42680, AT3G08720, AT3G60390, AT3G61890, AT5G44190]"/>
    <att type="string" name="GOGroups0" value="[Group6]"/>
    <att type="string" name="GOID0" value="GO:0010557"/>
    <att type="string" name="GOLevels0" value="[6]"/>
    <att type="string" name="GOTerm0" value="positive regulation of macromolecule biosynthetic process"/>
    <att type="string" name="Group PValue Corrected with Bonferroni0" value="{Group6=0.005947125430452599}"/>
    <att type="string" name="Group PValue0" value="{Group6=3.498309076736823E-4}"/>
    <att type="integer" name="Nr. Genes0" value="5"/>
    <att type="string" name="Ontology Source0" value="GO_BiologicalProcess_05.05.2011_16h22"/>
    <att type="string" name="OverViewTerm0" value="FALSE"/>
    <att type="real" name="Term PValue Corrected with Bonferroni0" value="1.0"/>
    <att type="real" name="Term PValue0" value="0.007430111661917234"/>
    <att type="string" name="canonicalName" value="GO:00105570"/>
    <graphics type="ELLIPSE" h="30.0" w="30.0" x="1672.719482421875" y="794.663330078125" fill="#6eee80" width="1" outline="#000000"/>
  </node>
  <node label="GO:00103830" id="-98">
    <att type="real" name="% Associated Genes0" value="7.142857074737549"/>
    <att type="string" name="All Associated Genes0" value="[ASD1, AT1G19300, AT2G28110, AT2G37090, AT4G08160, AT5G33290, AT5G54690, At2g35610, At5g67210, BXL4, F11C1_60, F8H, GPDL1, HHT1, IRX10, IRX10L, IRX14, IRX14H, IRX3, IRX9H, PGSIP1, SHV3, XTH12, XTH13, XTH17, XTH18, XTH19, XYL1]"/>
    <att type="string" name="Associated Genes Found0" value="[AT1G19300, AT5G33290]"/>
    <att type="string" name="GOGroups0" value="[Group15]"/>
    <att type="string" name="GOID0" value="GO:0010383"/>
    <att type="string" name="GOLevels0" value="[4, 5]"/>
    <att type="string" name="GOTerm0" value="cell wall polysaccharide metabolic process"/>
    <att type="string" name="Group PValue Corrected with Bonferroni0" value="{Group15=7.871587599059506E-7}"/>
    <att type="string" name="Group PValue0" value="{Group15=4.6303456465055917E-8}"/>
    <att type="integer" name="Nr. Genes0" value="2"/>
    <att type="string" name="Ontology Source0" value="GO_BiologicalProcess_05.05.2011_16h22"/>
    <att type="string" name="OverViewTerm0" value="FALSE"/>
    <att type="real" name="Term PValue Corrected with Bonferroni0" value="1.0"/>
    <att type="real" name="Term PValue0" value="0.05553709718858124"/>
    <att type="string" name="canonicalName" value="GO:00103830"/>
    <graphics type="ELLIPSE" h="29.9998779296875" w="30.0" x="1488.49462890625" y="1500.5501098632812" fill="#9c0e2d" width="1" outline="#000000"/>
  </node>
  <node label="GO:00103820" id="-97">
    <att type="real" name="% Associated Genes0" value="7.142857074737549"/>
    <att type="string" name="All Associated Genes0" value="[AT1G19300, AT2G28110, AT2G37090, AT5G33290, AT5G54690, At1g63680, At1g73740/F25P226, At2g35610, At3g08840/T16O11_23, At5g67210, F11C1_60, F8H, HHT1, IRX10, IRX10L, IRX14, IRX14H, IRX3, IRX9H, PGSIP1, T16O113, T16O114, XTH12, XTH13, XTH17, XTH18, XTH19, XYL1]"/>
    <att type="string" name="Associated Genes Found0" value="[AT1G19300, AT5G33290]"/>
    <att type="string" name="GOGroups0" value="[Group15]"/>
    <att type="string" name="GOID0" value="GO:0010382"/>
    <att type="string" name="GOLevels0" value="[4]"/>
    <att type="string" name="GOTerm0" value="cellular cell wall macromolecule metabolic process"/>
    <att type="string" name="Group PValue Corrected with Bonferroni0" value="{Group15=7.871587599059506E-7}"/>
    <att type="string" name="Group PValue0" value="{Group15=4.6303456465055917E-8}"/>
    <att type="integer" name="Nr. Genes0" value="2"/>
    <att type="string" name="Ontology Source0" value="GO_BiologicalProcess_05.05.2011_16h22"/>
    <att type="string" name="OverViewTerm0" value="FALSE"/>
    <att type="real" name="Term PValue Corrected with Bonferroni0" value="1.0"/>
    <att type="real" name="Term PValue0" value="0.05553709718858124"/>
    <att type="string" name="canonicalName" value="GO:00103820"/>
    <graphics type="ELLIPSE" h="29.9998779296875" w="30.0" x="1410.8868408203125" y="1599.9801635742188" fill="#9c0e2d" width="1" outline="#000000"/>
  </node>
  <node label="GO:00102050" id="-95">
    <att type="real" name="% Associated Genes0" value="22.22222137451172"/>
    <att type="string" name="All Associated Genes0" value="[AT3G15850, AT5G57050, DEGP7, FAD6, PAP12, PSBO1, PSBO2, VAR1, VAR2]"/>
    <att type="string" name="Associated Genes Found0" value="[AT3G15850, AT5G57050]"/>
    <att type="string" name="GOGroups0" value="[Group2, Group5]"/>
    <att type="string" name="GOID0" value="GO:0010205"/>
    <att type="string" name="GOLevels0" value="[7, 8]"/>
    <att type="string" name="GOTerm0" value="photoinhibition"/>
    <att type="string" name="Group PValue Corrected with Bonferroni0" value="{Group2=2.667419925045739E-10, Group5=2.6136523534972203E-9}"/>
    <att type="string" name="Group PValue0" value="{Group2=1.5690705441445522E-11, Group5=1.5374425608807179E-10}"/>
    <att type="integer" name="Nr. Genes0" value="2"/>
    <att type="string" name="Ontology Source0" value="GO_BiologicalProcess_05.05.2011_16h22"/>
    <att type="string" name="OverViewTerm0" value="FALSE"/>
    <att type="real" name="Term PValue Corrected with Bonferroni0" value="0.9332553429838425"/>
    <att type="real" name="Term PValue0" value="0.006263458677743909"/>
    <att type="string" name="canonicalName" value="GO:00102050"/>
    <graphics type="ELLIPSE" h="29.999969482421875" w="30.000030517578125" x="425.99195861816406" y="307.6651153564453" fill="#4d1a74" width="1" outline="#000000"/>
  </node>
  <node label="GO:00101820" id="-94">
    <att type="real" name="% Associated Genes0" value="6.25"/>
    <att type="string" name="All Associated Genes0" value="[ASL2, AT1G05630, AT1G16540, AT1G45249, AT1G52340, AT1G56650, AT1G66340, AT1G76030, AT1G78580, AT2G19860, AT2G36270, AT2G40220, AT3G20770, AT3G51770, AT4G02060, AT4G15900, AT5G03730, AT5G45830, AT5G46210, AT5G64930, At3g26090, At5g67030, BT2, EIN2, GATA21, HXK1, KIN10, LBA1, PSB29, RPT5B, SIS3, SR45]"/>
    <att type="string" name="Associated Genes Found0" value="[AT1G78580, AT2G19860]"/>
    <att type="string" name="GOGroups0" value="[Group3, Group4]"/>
    <att type="string" name="GOID0" value="GO:0010182"/>
    <att type="string" name="GOLevels0" value="[4, 5, 6, 7]"/>
    <att type="string" name="GOTerm0" value="sugar mediated signaling pathway"/>
    <att type="string" name="Group PValue Corrected with Bonferroni0" value="{Group3=1.4156565253701234E-4, Group4=0.0036532098882545404}"/>
    <att type="string" name="Group PValue0" value="{Group3=8.327391325706609E-6, Group4=2.1489469930909062E-4}"/>
    <att type="integer" name="Nr. Genes0" value="2"/>
    <att type="string" name="Ontology Source0" value="GO_BiologicalProcess_05.05.2011_16h22"/>
    <att type="string" name="OverViewTerm0" value="FALSE"/>
    <att type="real" name="Term PValue Corrected with Bonferroni0" value="1.0"/>
    <att type="real" name="Term PValue0" value="0.07035955889051548"/>
    <att type="string" name="canonicalName" value="GO:00101820"/>
    <graphics type="ELLIPSE" h="30.0" w="30.0" x="288.8661804199219" y="1687.296875" fill="#98e702" width="1" outline="#000000"/>
  </node>
  <node label="GO:00101580" id="-93">
    <att type="real" name="% Associated Genes0" value="28.571428298950195"/>
    <att type="string" name="All Associated Genes0" value="[AT1G08465, AT1G68480, AT2G45190, AT4G00180, AT5G16560, AT5G60450, ETT]"/>
    <att type="string" name="Associated Genes Found0" value="[AT2G45190, AT4G00180]"/>
    <att type="string" name="GOGroups0" value="[Group15]"/>
    <att type="string" name="GOID0" value="GO:0010158"/>
    <att type="string" name="GOLevels0" value="[4, 5, 6]"/>
    <att type="string" name="GOTerm0" value="abaxial cell fate specification"/>
    <att type="string" name="Group PValue Corrected with Bonferroni0" value="{Group15=7.871587599059506E-7}"/>
    <att type="string" name="Group PValue0" value="{Group15=4.6303456465055917E-8}"/>
    <att type="integer" name="Nr. Genes0" value="2"/>
    <att type="string" name="Ontology Source0" value="GO_BiologicalProcess_05.05.2011_16h22"/>
    <att type="string" name="OverViewTerm0" value="FALSE"/>
    <att type="real" name="Term PValue Corrected with Bonferroni0" value="0.5542921554462441"/>
    <att type="real" name="Term PValue0" value="0.0037200815801761346"/>
    <att type="string" name="canonicalName" value="GO:00101580"/>
    <graphics type="ELLIPSE" h="29.9998779296875" w="30.0001220703125" x="1245.2893676757812" y="1584.4789428710938" fill="#9c0e2d" width="1" outline="#000000"/>
  </node>
  <node label="GO:00101200" id="-91">
    <att type="real" name="% Associated Genes0" value="62.5"/>
    <att type="string" name="All Associated Genes0" value="[AT2G22330, AT2G30770, AT2G38470, AT2G43790, AT3G26830, AT3G45640, AT4G39950, At1g73500/T9L24_8]"/>
    <att type="string" name="Associated Genes Found0" value="[AT2G22330, AT2G30770, AT3G26830, AT3G45640, AT4G39950]"/>
    <att type="string" name="GOGroups0" value="[Group11]"/>
    <att type="string" name="GOID0" value="GO:0010120"/>
    <att type="string" name="GOLevels0" value="[5, 6, 7]"/>
    <att type="string" name="GOTerm0" value="camalexin biosynthetic process"/>
    <att type="string" name="Group PValue Corrected with Bonferroni0" value="{Group11=1.5686285002411636E-22}"/>
    <att type="string" name="Group PValue0" value="{Group11=9.227226472006844E-24}"/>
    <att type="integer" name="Nr. Genes0" value="5"/>
    <att type="string" name="Ontology Source0" value="GO_BiologicalProcess_05.05.2011_16h22"/>
    <att type="string" name="OverViewTerm0" value="FALSE"/>
    <att type="real" name="Term PValue Corrected with Bonferroni0" value="3.6557816590166254E-6"/>
    <att type="real" name="Term PValue0" value="2.4535447375950506E-8"/>
    <att type="string" name="canonicalName" value="GO:00101200"/>
    <graphics type="ELLIPSE" h="50.0" w="50.0" x="807.0166625976562" y="969.2314453125" fill="#02068d" width="1" outline="#000000"/>
  </node>
  <node label="GO:00101120" id="-90">
    <att type="real" name="% Associated Genes0" value="44.44444274902344"/>
    <att type="string" name="All Associated Genes0" value="[AT1G02450, AT2G22330, AT3G26830, AT4G18470, AT5G13220, AT5G60410, GH32, ILL5, ILL6]"/>
    <att type="string" name="Associated Genes Found0" value="[AT1G02450, AT2G22330, AT3G26830, AT5G13220]"/>
    <att type="string" name="GOGroups0" value="[Group11]"/>
    <att type="string" name="GOID0" value="GO:0010112"/>
    <att type="string" name="GOLevels0" value="[4, 5, 6, 7]"/>
    <att type="string" name="GOTerm0" value="regulation of systemic acquired resistance"/>
    <att type="string" name="Group PValue Corrected with Bonferroni0" value="{Group11=1.5686285002411636E-22}"/>
    <att type="string" name="Group PValue0" value="{Group11=9.227226472006844E-24}"/>
    <att type="integer" name="Nr. Genes0" value="4"/>
    <att type="string" name="Ontology Source0" value="GO_BiologicalProcess_05.05.2011_16h22"/>
    <att type="string" name="OverViewTerm0" value="FALSE"/>
    <att type="real" name="Term PValue Corrected with Bonferroni0" value="6.008488790612901E-4"/>
    <att type="real" name="Term PValue0" value="4.0325428124918795E-6"/>
    <att type="string" name="canonicalName" value="GO:00101120"/>
    <graphics type="ELLIPSE" h="50.0" w="50.0" x="834.6172485351562" y="903.21484375" fill="#02068d" width="1" outline="#000000"/>
  </node>
  <node label="GO:00101090" id="-89">
    <att type="real" name="% Associated Genes0" value="8.69565200805664"/>
    <att type="string" name="All Associated Genes0" value="[AT3G11670, AT3G15850, AT5G57050, At1g76560, At5g52520, C7A1030, DEGP7, FAD6, GPT2, PAP12, PHYLLO, PPH1, PSAG, PSBO1, PSBO2, STN7, STN8, T12C14_110, T8I134, VAR1, VAR2, psbZ, secA]"/>
    <att type="string" name="Associated Genes Found0" value="[AT3G15850, AT5G57050]"/>
    <att type="string" name="GOGroups0" value="[Group2, Group5]"/>
    <att type="string" name="GOID0" value="GO:0010109"/>
    <att type="string" name="GOLevels0" value="[5]"/>
    <att type="string" name="GOTerm0" value="regulation of photosynthesis"/>
    <att type="string" name="Group PValue Corrected with Bonferroni0" value="{Group2=2.667419925045739E-10, Group5=2.6136523534972203E-9}"/>
    <att type="string" name="Group PValue0" value="{Group2=1.5690705441445522E-11, Group5=1.5374425608807179E-10}"/>
    <att type="integer" name="Nr. Genes0" value="2"/>
    <att type="string" name="Ontology Source0" value="GO_BiologicalProcess_05.05.2011_16h22"/>
    <att type="string" name="OverViewTerm0" value="FALSE"/>
    <att type="real" name="Term PValue Corrected with Bonferroni0" value="1.0"/>
    <att type="real" name="Term PValue0" value="0.03884869575958855"/>
    <att type="string" name="canonicalName" value="GO:00101090"/>
    <graphics type="ELLIPSE" h="30.000030517578125" w="30.0" x="621.113037109375" y="497.09605407714844" fill="#4d1a74" width="1" outline="#000000"/>
  </node>
  <node label="GO:00100510" id="-88">
    <att type="real" name="% Associated Genes0" value="4.651162624359131"/>
    <att type="string" name="All Associated Genes0" value="[AT1G15750, AT1G19300, AT1G20330, AT2G46990, AT3G54720, AT4G08150, AT5G02030, AT5G10250, AT5G16560, AT5G16780, AT5G42080, AT5G60690, At1g13290, At1g14000, At1g23320, At1g48920, At2g32010, At2g36120, At2g42580, At4g17220/dl4645c, At4g24670, At4g39403, At5g46700, At5g55540, BRL1, CAND1, COV, CVP2, F14L2_150, F16M2_150, F18A540, F23E1350, F24M1200, F3C22_170, IAA12, IRX14, MP, PCMP-H45, PIN1, SFC, T22A60, TAA1, map70-1]"/>
    <att type="string" name="Associated Genes Found0" value="[AT1G15750, AT1G19300]"/>
    <att type="string" name="GOGroups0" value="[Group15]"/>
    <att type="string" name="GOID0" value="GO:0010051"/>
    <att type="string" name="GOLevels0" value="[4, 5]"/>
    <att type="string" name="GOTerm0" value="xylem and phloem pattern formation"/>
    <att type="string" name="Group PValue Corrected with Bonferroni0" value="{Group15=7.871587599059506E-7}"/>
    <att type="string" name="Group PValue0" value="{Group15=4.6303456465055917E-8}"/>
    <att type="integer" name="Nr. Genes0" value="2"/>
    <att type="string" name="Ontology Source0" value="GO_BiologicalProcess_05.05.2011_16h22"/>
    <att type="string" name="OverViewTerm0" value="FALSE"/>
    <att type="real" name="Term PValue Corrected with Bonferroni0" value="1.0"/>
    <att type="real" name="Term PValue0" value="0.11640474762815994"/>
    <att type="string" name="canonicalName" value="GO:00100510"/>
    <graphics type="ELLIPSE" h="30.0" w="30.0" x="1404.97998046875" y="1510.0106201171875" fill="#9c0e2d" width="1" outline="#000000"/>
  </node>
  <node label="GO:00100390" id="-87">
    <att type="real" name="% Associated Genes0" value="7.692307472229004"/>
    <att type="string" name="All Associated Genes0" value="[AT1G16890, AT1G62380, AT1G66340, AT1G78870, AT2G19590, AT2G22810, AT3G20770, AT3G49700, AT3G53280, AT4G11280, AT4G24120, AT5G03730, ATNRAMP4, At1g21140, At1g76800, At2g05830, At3g25190, At5g38820, At5g42130, At5g55620, BGLU42, EIL1, EIL3, EIN2, F14G92, FER1, FER3, FER4, FIT, FRD3, IRT1, MTK, NAS1, NAS2, SAM1, SAM2, SODCC, SODCP, YSL2]"/>
    <att type="string" name="Associated Genes Found0" value="[AT1G62380, AT4G11280, AT4G24120]"/>
    <att type="string" name="GOGroups0" value="[Group8]"/>
    <att type="string" name="GOID0" value="GO:0010039"/>
    <att type="string" name="GOLevels0" value="[5]"/>
    <att type="string" name="GOTerm0" value="response to iron ion"/>
    <att type="string" name="Group PValue Corrected with Bonferroni0" value="{Group8=1.9149650656212817E-4}"/>
    <att type="string" name="Group PValue0" value="{Group8=1.126450038600754E-5}"/>
    <att type="integer" name="Nr. Genes0" value="3"/>
    <att type="string" name="Ontology Source0" value="GO_BiologicalProcess_05.05.2011_16h22"/>
    <att type="string" name="OverViewTerm0" value="FALSE"/>
    <att type="real" name="Term PValue Corrected with Bonferroni0" value="1.0"/>
    <att type="real" name="Term PValue0" value="0.015964824581889945"/>
    <att type="string" name="canonicalName" value="GO:00100390"/>
    <graphics type="ELLIPSE" h="30.0" w="30.0" x="1727.0" y="1244.0" fill="#8bac27" width="1" outline="#000000"/>
  </node>
  <node label="GO:00100290" id="-86">
    <att type="real" name="% Associated Genes0" value="8.108108520507812"/>
    <att type="string" name="All Associated Genes0" value="[ABCC1, ARIA, AT1G14920, AT1G20450, AT1G27320, AT1G62380, AT2G01570, AT2G18790, AT2G19450, AT2G20180, AT2G34900, AT2G36270, AT3G03450, AT3G50500, AT4G36930, AT5G13910, AT5G35750, AT5G55630, AT5G66880, ATE1, At1g03790, At1g16060, At1g54060, At2g42160, At3g11240, BRIZ2, F28J1210, GATA21, GATA22, HSR2, MFT, RPN10, T1E22_60, TCP14, VAL1, VAL2, WOL]"/>
    <att type="string" name="Associated Genes Found0" value="[AT1G20450, AT1G62380, AT3G50500]"/>
    <att type="string" name="GOGroups0" value="[Group7, Group8]"/>
    <att type="string" name="GOID0" value="GO:0010029"/>
    <att type="string" name="GOLevels0" value="[6]"/>
    <att type="string" name="GOTerm0" value="regulation of seed germination"/>
    <att type="string" name="Group PValue Corrected with Bonferroni0" value="{Group7=0.005947125430452599, Group8=1.9149650656212817E-4}"/>
    <att type="string" name="Group PValue0" value="{Group7=3.498309076736823E-4, Group8=1.126450038600754E-5}"/>
    <att type="integer" name="Nr. Genes0" value="3"/>
    <att type="string" name="Ontology Source0" value="GO_BiologicalProcess_05.05.2011_16h22"/>
    <att type="string" name="OverViewTerm0" value="FALSE"/>
    <att type="real" name="Term PValue Corrected with Bonferroni0" value="1.0"/>
    <att type="real" name="Term PValue0" value="0.01384535929296746"/>
    <att type="string" name="canonicalName" value="GO:00100290"/>
    <graphics type="ELLIPSE" h="30.0" w="30.0" x="1603.6571044921875" y="1108.380859375" fill="#fed31a" width="1" outline="#000000"/>
  </node>
  <node label="GO:00099680" id="-85">
    <att type="real" name="% Associated Genes0" value="10.256410598754883"/>
    <att type="string" name="All Associated Genes0" value="[AHL25, AIP2, AT1G14920, AT1G50640, AT1G66340, AT1G66350, AT2G01570, AT2G25490, AT3G02140, AT3G03450, AT3G11540, AT3G15210, AT3G48040, AT3G59380, AT4G01060, AT4G26080, AT5G01810, AT5G03730, AT5G08335, AT5G10720, AT5G23320, AT5G25350, AT5G57050, AT5G64750, ATHB-6, At2g26070, At2g39550, DOR, DWA1, DWA2, EIN4, ERS1, ERS2, ETR2, GLIP2, NAC002, PKL, PP2CA, SAL1]"/>
    <att type="string" name="Associated Genes Found0" value="[AT2G25490, AT4G01060, AT4G26080, AT5G57050]"/>
    <att type="string" name="GOGroups0" value="[Group11, Group5]"/>
    <att type="string" name="GOID0" value="GO:0009968"/>
    <att type="string" name="GOLevels0" value="[5, 6]"/>
    <att type="string" name="GOTerm0" value="negative regulation of signal transduction"/>
    <att type="string" name="Group PValue Corrected with Bonferroni0" value="{Group11=1.5686285002411636E-22, Group5=2.6136523534972203E-9}"/>
    <att type="string" name="Group PValue0" value="{Group11=9.227226472006844E-24, Group5=1.5374425608807179E-10}"/>
    <att type="integer" name="Nr. Genes0" value="4"/>
    <att type="string" name="Ontology Source0" value="GO_BiologicalProcess_05.05.2011_16h22"/>
    <att type="string" name="OverViewTerm0" value="FALSE"/>
    <att type="real" name="Term PValue Corrected with Bonferroni0" value="0.2845191509556112"/>
    <att type="real" name="Term PValue0" value="0.0019095245030577932"/>
    <att type="string" name="canonicalName" value="GO:00099680"/>
    <graphics type="ELLIPSE" h="30.0" w="30.0" x="728.3349609375" y="801.3804931640625" fill="#02068d" width="1" outline="#000000"/>
  </node>
  <node label="GO:00099660" id="-84">
    <att type="real" name="% Associated Genes0" value="5.833333492279053"/>
    <att type="string" name="All Associated Genes0" value="[AGD13, AGD4, AHL25, AIP2, AT1G04830, AT1G08680, AT1G14920, AT1G17440, AT1G50640, AT1G66340, AT1G66350, AT2G01570, AT2G04550, AT2G25490, AT2G35210, AT2G37290, AT2G37550, AT2G39280, AT2G43490, AT3G02140, AT3G03450, AT3G07490, AT3G11540, AT3G15210, AT3G16360, AT3G17660, AT3G21510, AT3G29350, AT3G43300, AT3G45640, AT3G48040, AT3G50500, AT3G53710, AT3G55530, AT3G59380, AT4G01060, AT4G09570, AT4G13730, AT4G17890, AT4G19660, AT4G21160, AT4G26080, AT4G33680, AT5G01810, AT5G03730, AT5G06100, AT5G08335, AT5G10720, AT5G13220, AT5G23320, AT5G25350, AT5G39340, AT5G46750, AT5G52200, AT5G52580, AT5G53000, AT5G54310, AT5G57050, AT5G60410, AT5G61980, AT5G64750, AT5G66880, ATCDPK2, ATHB-6, At1g01960, At1g04450, At1g14000, At1g52920, At2g14490, At2g26070, At2g31800, At2g32460, At2g39550, At2g43850, At3g06110/F28L1_5, At4g18950, At4g20380, At4g23450, At4g32630, At5g39500, At5g52200, BGLU18, DOR, DWA1, DWA2, EIN2, EIN4, ERS1, ERS2, ETR2, F20D1020, F23E120, F24G1600, F7K15_150, GID1A, GID1B, GID1C, GLIP2, GN, GP ALPHA 1, MMS21, NAC002, NP_001154777, NUDT6, PED1, PKL, PLDALPHA1, PP2AA1, PP2CA, PYL8, RHA2A, SAL1, SFC, SNE, SSP, T20N10_110, T22K7_10, T4C21_270, T9E80, TTL1]"/>
    <att type="string" name="Associated Genes Found0" value="[AT2G25490, AT3G45640, AT3G50500, AT4G01060, AT4G26080, AT5G13220, AT5G57050]"/>
    <att type="string" name="GOGroups0" value="[Group11, Group16, Group5]"/>
    <att type="string" name="GOID0" value="GO:0009966"/>
    <att type="string" name="GOLevels0" value="[4]"/>
    <att type="string" name="GOTerm0" value="regulation of signal transduction"/>
    <att type="string" name="Group PValue Corrected with Bonferroni0" value="{Group11=1.5686285002411636E-22, Group16=6.128750210897452E-6, Group5=2.6136523534972203E-9}"/>
    <att type="string" name="Group PValue0" value="{Group11=9.227226472006844E-24, Group16=3.605147182880854E-7, Group5=1.5374425608807179E-10}"/>
    <att type="integer" name="Nr. Genes0" value="7"/>
    <att type="string" name="Ontology Source0" value="GO_BiologicalProcess_05.05.2011_16h22"/>
    <att type="string" name="OverViewTerm0" value="FALSE"/>
    <att type="real" name="Term PValue Corrected with Bonferroni0" value="0.19331108817446008"/>
    <att type="real" name="Term PValue0" value="0.0012973898535198662"/>
    <att type="string" name="canonicalName" value="GO:00099660"/>
    <graphics type="ELLIPSE" h="29.999969482421875" w="30.0" x="886.5399780273438" y="526.5940704345703" fill="#02068d" width="1" outline="#000000"/>
  </node>
  <node label="GO:00099330" id="-83">
    <att type="real" name="% Associated Genes0" value="6.666666507720947"/>
    <att type="string" name="All Associated Genes0" value="[AT1G15750, AT1G20700, AT1G52150, AT1G69120, AT1G72560, AT2G25700, AT2G34710, AT2G45190, AT4G32880, AT5G16780, AT5G60690, AT5G64630, ATHB-9, At1g13870, At5g46700, At5g51430, At5g55540, CDC27B, F14L2_150, NAC021, NAC031, NAC054, NAC098, OBE1, OBE2, RPT2A, SKP1, SUB, TOP1ALPHA, TSK]"/>
    <att type="string" name="Associated Genes Found0" value="[AT1G15750, AT2G45190]"/>
    <att type="string" name="GOGroups0" value="[Group15]"/>
    <att type="string" name="GOID0" value="GO:0009933"/>
    <att type="string" name="GOLevels0" value="[3, 4, 5, 6]"/>
    <att type="string" name="GOTerm0" value="meristem structural organization"/>
    <att type="string" name="Group PValue Corrected with Bonferroni0" value="{Group15=7.871587599059506E-7}"/>
    <att type="string" name="Group PValue0" value="{Group15=4.6303456465055917E-8}"/>
    <att type="integer" name="Nr. Genes0" value="2"/>
    <att type="string" name="Ontology Source0" value="GO_BiologicalProcess_05.05.2011_16h22"/>
    <att type="string" name="OverViewTerm0" value="FALSE"/>
    <att type="real" name="Term PValue Corrected with Bonferroni0" value="1.0"/>
    <att type="real" name="Term PValue0" value="0.06279810604953844"/>
    <att type="string" name="canonicalName" value="GO:00099330"/>
    <graphics type="ELLIPSE" h="30.0" w="30.0" x="1333.86279296875" y="1561.2322998046875" fill="#9c0e2d" width="1" outline="#000000"/>
  </node>
  <node label="GO:00098930" id="-82">
    <att type="real" name="% Associated Genes0" value="4.629629611968994"/>
    <att type="string" name="All Associated Genes0" value="[ASHH2, AT1G09530, AT1G21600, AT1G28300, AT1G45249, AT1G62180, AT1G69120, AT2G20570, AT2G23430, AT2G36270, AT2G36490, AT2G42680, AT3G01470, AT3G08720, AT3G08730, AT3G11440, AT3G24140, AT3G24500, AT3G26744, AT3G26790, AT3G58680, AT3G60390, AT3G61890, AT4G40060, AT5G06100, AT5G08565, AT5G11260, AT5G22220, AT5G22260, AT5G44190, AT5G47220, AT5G65310, ATHB-51, ATHB-6, ATHSFA2, At1g13950, At1g25540, At1g26630, At1g43860/F28H191, At1g61040, At1g67810, At1g69410, At1g71930, At1g73500/T9L24_8, At1g75500, At2g02540, At2g32460, At2g34210, At2g34640, At2g35530, At2g48070, At3g09210, At3g10800, At4g08350, At4g23450, At5g08565, At5g48930, At5g50210, At5g62380, At5g63670, BHLH54, BRN1, BRN2, CHR1, CPL2, DOF3, DOF5, DPBF2, E2FA, ELF8, ERABP1, F18K100, F24M1200, F27K19_170, FZR1, GATA12, GATA2, GATA3, GATA4, GATA5, GATA6, GATA7, GATA8, GATA9, GCN5, INO80, IRX1, NAC012, NAC043, NAC066, NAC078, NAC69, NFYB6, NFYB9, NFYC1, NFYC2, NPR6, NP_182035, PTAC2, Q42021, RABG3B, RAP1, REP, SCL14, T18I3, WRKY53, ZAP1, sig]"/>
    <att type="string" name="Associated Genes Found0" value="[AT2G42680, AT3G08720, AT3G60390, AT3G61890, AT5G44190]"/>
    <att type="string" name="GOGroups0" value="[Group6]"/>
    <att type="string" name="GOID0" value="GO:0009893"/>
    <att type="string" name="GOLevels0" value="[4]"/>
    <att type="string" name="GOTerm0" value="positive regulation of metabolic process"/>
    <att type="string" name="Group PValue Corrected with Bonferroni0" value="{Group6=0.005947125430452599}"/>
    <att type="string" name="Group PValue0" value="{Group6=3.498309076736823E-4}"/>
    <att type="integer" name="Nr. Genes0" value="5"/>
    <att type="string" name="Ontology Source0" value="GO_BiologicalProcess_05.05.2011_16h22"/>
    <att type="string" name="OverViewTerm0" value="FALSE"/>
    <att type="real" name="Term PValue Corrected with Bonferroni0" value="1.0"/>
    <att type="real" name="Term PValue0" value="0.016231126875669976"/>
    <att type="string" name="canonicalName" value="GO:00098930"/>
    <graphics type="ELLIPSE" h="30.0" w="30.0" x="1631.6610107421875" y="682.5001831054688" fill="#6eee80" width="1" outline="#000000"/>
  </node>
  <node label="GO:00098910" id="-81">
    <att type="real" name="% Associated Genes0" value="5.15463924407959"/>
    <att type="string" name="All Associated Genes0" value="[AT1G21600, AT1G28300, AT1G45249, AT1G62180, AT1G69120, AT2G20570, AT2G23430, AT2G36270, AT2G36490, AT2G42680, AT3G01470, AT3G08720, AT3G08730, AT3G11440, AT3G24140, AT3G24500, AT3G26744, AT3G26790, AT3G58680, AT3G60390, AT3G61890, AT4G40060, AT5G06100, AT5G08565, AT5G22220, AT5G22260, AT5G44190, AT5G47220, AT5G65310, ATHB-51, ATHB-6, ATHSFA2, At1g13950, At1g25540, At1g26630, At1g43860/F28H191, At1g61040, At1g69410, At1g71930, At1g73500/T9L24_8, At2g02540, At2g32460, At2g34210, At2g34640, At2g35530, At2g48070, At3g09210, At3g10800, At4g08350, At4g23450, At5g08565, At5g48930, At5g62380, At5g63670, BHLH54, BRN1, BRN2, CPL2, DOF3, DOF5, DPBF2, E2FA, ELF8, ERABP1, F18K100, F24M1200, F27K19_170, FZR1, GATA12, GATA2, GATA3, GATA4, GATA5, GATA6, GATA7, GATA8, GATA9, GCN5, IRX1, NAC012, NAC043, NAC066, NAC078, NAC69, NFYB6, NFYB9, NFYC1, NFYC2, NPR6, NP_182035, PTAC2, Q42021, RAP1, SCL14, WRKY53, ZAP1, sig]"/>
    <att type="string" name="Associated Genes Found0" value="[AT2G42680, AT3G08720, AT3G60390, AT3G61890, AT5G44190]"/>
    <att type="string" name="GOGroups0" value="[Group6]"/>
    <att type="string" name="GOID0" value="GO:0009891"/>
    <att type="string" name="GOLevels0" value="[5]"/>
    <att type="string" name="GOTerm0" value="positive regulation of biosynthetic process"/>
    <att type="string" name="Group PValue Corrected with Bonferroni0" value="{Group6=0.005947125430452599}"/>
    <att type="string" name="Group PValue0" value="{Group6=3.498309076736823E-4}"/>
    <att type="integer" name="Nr. Genes0" value="5"/>
    <att type="string" name="Ontology Source0" value="GO_BiologicalProcess_05.05.2011_16h22"/>
    <att type="string" name="OverViewTerm0" value="FALSE"/>
    <att type="real" name="Term PValue Corrected with Bonferroni0" value="1.0"/>
    <att type="real" name="Term PValue0" value="0.010573781187021892"/>
    <att type="string" name="canonicalName" value="GO:00098910"/>
    <graphics type="ELLIPSE" h="30.0" w="30.0" x="1538.5272216796875" y="796.663330078125" fill="#6eee80" width="1" outline="#000000"/>
  </node>
  <node label="GO:00098670" id="-80">
    <att type="real" name="% Associated Genes0" value="4.761904716491699"/>
    <att type="string" name="All Associated Genes0" value="[AFPH2, AT1G14920, AT1G15750, AT1G17440, AT1G19180, AT1G66350, AT2G01570, AT2G18790, AT2G39940, AT2G43790, AT3G03450, AT3G15210, AT3G27810, AT3G50660, AT4G01370, AT4G02570, AT4G11260, AT5G40350, AT5G47220, AT5G60410, ATMKK3, At1g25540, At1g32230, At1g53130, At2g44050, At3g01530/F4P13_8, At5g11270, CESA4, ERF1B, GB1, GRXC9, IRX1, JAR1, NAC055, RNS1, SYP121, SYP122, THI2, TIFY6B, WRKY50, WRKY51, WRKY70]"/>
    <att type="string" name="Associated Genes Found0" value="[AT1G15750, AT1G19180]"/>
    <att type="string" name="GOGroups0" value="[Group15]"/>
    <att type="string" name="GOID0" value="GO:0009867"/>
    <att type="string" name="GOLevels0" value="[3, 4, 5, 6]"/>
    <att type="string" name="GOTerm0" value="jasmonic acid mediated signaling pathway"/>
    <att type="string" name="Group PValue Corrected with Bonferroni0" value="{Group15=7.871587599059506E-7}"/>
    <att type="string" name="Group PValue0" value="{Group15=4.6303456465055917E-8}"/>
    <att type="integer" name="Nr. Genes0" value="2"/>
    <att type="string" name="Ontology Source0" value="GO_BiologicalProcess_05.05.2011_16h22"/>
    <att type="string" name="OverViewTerm0" value="FALSE"/>
    <att type="real" name="Term PValue Corrected with Bonferroni0" value="1.0"/>
    <att type="real" name="Term PValue0" value="0.11195435538772656"/>
    <att type="string" name="canonicalName" value="GO:00098670"/>
    <graphics type="ELLIPSE" h="30.0" w="30.0" x="1401.9708251953125" y="1422.6485595703125" fill="#9c0e2d" width="1" outline="#000000"/>
  </node>
  <node label="GO:00098510" id="-79">
    <att type="real" name="% Associated Genes0" value="10.714285850524902"/>
    <att type="string" name="All Associated Genes0" value="[4CLL7, 4CLL9, AT1G25220, AT1G48910, AT2G22330, AT2G27150, AT4G32540, AT4G39950, AT5G11320, AT5G20960, AT5G25620, At1g08980, At4g24670, At5g17300, BIG, CYP83B1, NIT1, NIT2, RTY/SUR1, TAA1, TSB1, YUC11, YUC2, YUC3, YUC5, YUC7, YUC8, YUC9]"/>
    <att type="string" name="Associated Genes Found0" value="[AT2G22330, AT4G39950, AT5G20960]"/>
    <att type="string" name="GOGroups0" value="[Group11]"/>
    <att type="string" name="GOID0" value="GO:0009851"/>
    <att type="string" name="GOLevels0" value="[4, 6]"/>
    <att type="string" name="GOTerm0" value="auxin biosynthetic process"/>
    <att type="string" name="Group PValue Corrected with Bonferroni0" value="{Group11=1.5686285002411636E-22}"/>
    <att type="string" name="Group PValue0" value="{Group11=9.227226472006844E-24}"/>
    <att type="integer" name="Nr. Genes0" value="3"/>
    <att type="string" name="Ontology Source0" value="GO_BiologicalProcess_05.05.2011_16h22"/>
    <att type="string" name="OverViewTerm0" value="FALSE"/>
    <att type="real" name="Term PValue Corrected with Bonferroni0" value="0.9513575403231634"/>
    <att type="real" name="Term PValue0" value="0.006384949935054788"/>
    <att type="string" name="canonicalName" value="GO:00098510"/>
    <graphics type="ELLIPSE" h="30.0" w="30.0" x="664.201171875" y="1059.5537109375" fill="#02068d" width="1" outline="#000000"/>
  </node>
  <node label="GO:00098500" id="-78">
    <att type="real" name="% Associated Genes0" value="6.818181991577148"/>
    <att type="string" name="All Associated Genes0" value="[4CLL7, 4CLL9, AT1G25220, AT1G48410, AT1G48910, AT2G22330, AT2G27150, AT3G02875, AT4G32540, AT4G32810, AT4G39950, AT5G11320, AT5G14420, AT5G20960, AT5G25620, At1g05680, At1g08980, At1g55320, At3g05290, At3g10870, At3g18485, At4g24670, At5g17300, At5g27520, BIG, CVP2, CYP83B1, ETT, ILL2, NIT1, NIT2, RGLG1, RTY/SUR1, T1J24, TAA1, TSB1, YUC11, YUC2, YUC3, YUC5, YUC7, YUC8, YUC9, dl3255c]"/>
    <att type="string" name="Associated Genes Found0" value="[AT2G22330, AT4G39950, AT5G20960]"/>
    <att type="string" name="GOGroups0" value="[Group11]"/>
    <att type="string" name="GOID0" value="GO:0009850"/>
    <att type="string" name="GOLevels0" value="[3, 5]"/>
    <att type="string" name="GOTerm0" value="auxin metabolic process"/>
    <att type="string" name="Group PValue Corrected with Bonferroni0" value="{Group11=1.5686285002411636E-22}"/>
    <att type="string" name="Group PValue0" value="{Group11=9.227226472006844E-24}"/>
    <att type="integer" name="Nr. Genes0" value="3"/>
    <att type="string" name="Ontology Source0" value="GO_BiologicalProcess_05.05.2011_16h22"/>
    <att type="string" name="OverViewTerm0" value="FALSE"/>
    <att type="real" name="Term PValue Corrected with Bonferroni0" value="1.0"/>
    <att type="real" name="Term PValue0" value="0.022018829793368853"/>
    <att type="string" name="canonicalName" value="GO:00098500"/>
    <graphics type="ELLIPSE" h="30.0" w="30.0" x="674.369140625" y="1094.21484375" fill="#02068d" width="1" outline="#000000"/>
  </node>
  <node label="GO:00098350" id="-77">
    <att type="real" name="% Associated Genes0" value="22.22222137451172"/>
    <att type="string" name="All Associated Genes0" value="[AT1G01480, AT1G05010, AT2G22810, AT3G49700, AT4G08040, AT4G11280, AT4G26200, AT4G37770, AT5G65800]"/>
    <att type="string" name="Associated Genes Found0" value="[AT1G05010, AT4G11280]"/>
    <att type="string" name="GOGroups0" value="[Group8]"/>
    <att type="string" name="GOID0" value="GO:0009835"/>
    <att type="string" name="GOLevels0" value="[3, 4, 5, 6]"/>
    <att type="string" name="GOTerm0" value="ripening"/>
    <att type="string" name="Group PValue Corrected with Bonferroni0" value="{Group8=1.9149650656212817E-4}"/>
    <att type="string" name="Group PValue0" value="{Group8=1.126450038600754E-5}"/>
    <att type="integer" name="Nr. Genes0" value="2"/>
    <att type="string" name="Ontology Source0" value="GO_BiologicalProcess_05.05.2011_16h22"/>
    <att type="string" name="OverViewTerm0" value="FALSE"/>
    <att type="real" name="Term PValue Corrected with Bonferroni0" value="0.9332553429838425"/>
    <att type="real" name="Term PValue0" value="0.006263458677743909"/>
    <att type="string" name="canonicalName" value="GO:00098350"/>
    <graphics type="ELLIPSE" h="30.0" w="30.0" x="1878.0" y="1370.0" fill="#8bac27" width="1" outline="#000000"/>
  </node>
  <node label="GO:00098160" id="-76">
    <att type="real" name="% Associated Genes0" value="11.11111068725586"/>
    <att type="string" name="All Associated Genes0" value="[AT1G12220, AT2G27040, AT3G20600, AT3G44880, AT4G11850, AT4G14400, AT4G19660, AT4G23190, AT4G35450, AT5G13160, AT5G51700, At1g32230, At2g34690, At2g40000, At4g36290, At4g37460/F6G17_110, F22O6_190, GH32, HSP90-1, HSP90-2, NPR3, PLDBETA1, RIN4, RML1, SD113, WRKY52, WRKY53]"/>
    <att type="string" name="Associated Genes Found0" value="[AT1G12220, AT2G27040, AT3G44880]"/>
    <att type="string" name="GOGroups0" value="[Group10, Group11, Group17, Group8]"/>
    <att type="string" name="GOID0" value="GO:0009816"/>
    <att type="string" name="GOLevels0" value="[4, 5, 6]"/>
    <att type="string" name="GOTerm0" value="defense response to bacterium, incompatible interaction"/>
    <att type="string" name="Group PValue Corrected with Bonferroni0" value="{Group10=0.006736712397954536, Group11=1.5686285002411636E-22, Group17=0.0032000058459379366, Group8=1.9149650656212817E-4}"/>
    <att type="string" name="Group PValue0" value="{Group10=3.962771998796786E-4, Group11=9.227226472006844E-24, Group17=1.8823563799634922E-4, Group8=1.126450038600754E-5}"/>
    <att type="integer" name="Nr. Genes0" value="3"/>
    <att type="string" name="Ontology Source0" value="GO_BiologicalProcess_05.05.2011_16h22"/>
    <att type="string" name="OverViewTerm0" value="FALSE"/>
    <att type="real" name="Term PValue Corrected with Bonferroni0" value="0.85795873444348"/>
    <att type="real" name="Term PValue0" value="0.005758112311701208"/>
    <att type="string" name="canonicalName" value="GO:00098160"/>
    <graphics type="ELLIPSE" h="30.0" w="30.0" x="1198.1541748046875" y="710.1974487304688" fill="#8be2c9" width="1" outline="#000000"/>
  </node>
  <node label="GO:00098090" id="-75">
    <att type="real" name="% Associated Genes0" value="6.896551609039307"/>
    <att type="string" name="All Associated Genes0" value="[AT3G19450, AT4G34230, AT4G36220, AT5G44070, ATOMT1, At1g16490, At1g67980, At1g67990, At4g26220, At4g34050, At5g48930, BGLU45, BGLU46, CAD3, CAD6, CAD7, CAD8, CAD9, CTL2, CYP98A3, METK3, METK4, NAC012, NAC043, POM1, RML1, TT10, VHA-C, ccr1]"/>
    <att type="string" name="Associated Genes Found0" value="[AT4G34230, AT5G44070]"/>
    <att type="string" name="GOGroups0" value="[Group11, Group12]"/>
    <att type="string" name="GOID0" value="GO:0009809"/>
    <att type="string" name="GOLevels0" value="[5, 6]"/>
    <att type="string" name="GOTerm0" value="lignin biosynthetic process"/>
    <att type="string" name="Group PValue Corrected with Bonferroni0" value="{Group11=1.5686285002411636E-22, Group12=0.17002625782107086}"/>
    <att type="string" name="Group PValue0" value="{Group11=9.227226472006844E-24, Group12=0.010001544577710051}"/>
    <att type="integer" name="Nr. Genes0" value="2"/>
    <att type="string" name="Ontology Source0" value="GO_BiologicalProcess_05.05.2011_16h22"/>
    <att type="string" name="OverViewTerm0" value="FALSE"/>
    <att type="real" name="Term PValue Corrected with Bonferroni0" value="1.0"/>
    <att type="real" name="Term PValue0" value="0.05912866743905815"/>
    <att type="string" name="canonicalName" value="GO:00098090"/>
    <graphics type="ELLIPSE" h="30.0" w="30.0" x="577.0" y="1311.0" fill="#02068d" width="1" outline="#000000"/>
  </node>
  <node label="GO:00098080" id="-74">
    <att type="real" name="% Associated Genes0" value="4.0"/>
    <att type="string" name="All Associated Genes0" value="[AT2G38080, AT3G02130, AT3G19450, AT4G34230, AT4G36220, AT5G01050, AT5G44070, ATOMT1, At1g16490, At1g67980, At1g67990, At3g50740, At4g26220, At4g34050, At5g48930, At5g66690/MSN2, BGLU45, BGLU46, C4H, CAD3, CAD6, CAD7, CAD8, CAD9, CTL2, CYP98A3, LAC1, LAC10, LAC11, LAC12, LAC13, LAC14, LAC16, LAC17, LAC2, LAC3, LAC5, LAC6, LAC7, LAC8, METK3, METK4, NAC012, NAC043, PAL1, POM1, RML1, TT10, VHA-C, ccr1]"/>
    <att type="string" name="Associated Genes Found0" value="[AT4G34230, AT5G44070]"/>
    <att type="string" name="GOGroups0" value="[Group11, Group12]"/>
    <att type="string" name="GOID0" value="GO:0009808"/>
    <att type="string" name="GOLevels0" value="[4, 5]"/>
    <att type="string" name="GOTerm0" value="lignin metabolic process"/>
    <att type="string" name="Group PValue Corrected with Bonferroni0" value="{Group11=1.5686285002411636E-22, Group12=0.17002625782107086}"/>
    <att type="string" name="Group PValue0" value="{Group11=9.227226472006844E-24, Group12=0.010001544577710051}"/>
    <att type="integer" name="Nr. Genes0" value="2"/>
    <att type="string" name="Ontology Source0" value="GO_BiologicalProcess_05.05.2011_16h22"/>
    <att type="string" name="OverViewTerm0" value="FALSE"/>
    <att type="real" name="Term PValue Corrected with Bonferroni0" value="1.0"/>
    <att type="real" name="Term PValue0" value="0.1486844813743704"/>
    <att type="string" name="canonicalName" value="GO:00098080"/>
    <graphics type="ELLIPSE" h="30.0" w="30.0" x="603.0" y="1337.0" fill="#02068d" width="1" outline="#000000"/>
  </node>
  <node label="GO:00097880" id="-73">
    <att type="real" name="% Associated Genes0" value="15.0"/>
    <att type="string" name="All Associated Genes0" value="[AIP2, AT3G02140, AT3G48040, AT3G59380, AT4G01060, AT4G26080, AT5G01810, AT5G08335, AT5G10720, AT5G23320, AT5G57050, AT5G64750, ATHB-6, At2g39550, DOR, DWA1, DWA2, NAC002, PKL, PP2CA]"/>
    <att type="string" name="Associated Genes Found0" value="[AT4G01060, AT4G26080, AT5G57050]"/>
    <att type="string" name="GOGroups0" value="[Group11, Group5]"/>
    <att type="string" name="GOID0" value="GO:0009788"/>
    <att type="string" name="GOLevels0" value="[6, 7]"/>
    <att type="string" name="GOTerm0" value="negative regulation of abscisic acid mediated signaling pathway"/>
    <att type="string" name="Group PValue Corrected with Bonferroni0" value="{Group11=1.5686285002411636E-22, Group5=2.6136523534972203E-9}"/>
    <att type="string" name="Group PValue0" value="{Group11=9.227226472006844E-24, Group5=1.5374425608807179E-10}"/>
    <att type="integer" name="Nr. Genes0" value="3"/>
    <att type="string" name="Ontology Source0" value="GO_BiologicalProcess_05.05.2011_16h22"/>
    <att type="string" name="OverViewTerm0" value="FALSE"/>
    <att type="real" name="Term PValue Corrected with Bonferroni0" value="0.35868492420022124"/>
    <att type="real" name="Term PValue0" value="0.0024072813704712837"/>
    <att type="string" name="canonicalName" value="GO:00097880"/>
    <graphics type="ELLIPSE" h="29.99993896484375" w="30.0" x="698.7158203125" y="702.8198547363281" fill="#02068d" width="1" outline="#000000"/>
  </node>
  <node label="GO:00097870" id="-72">
    <att type="real" name="% Associated Genes0" value="10.256410598754883"/>
    <att type="string" name="All Associated Genes0" value="[AIP2, AT3G02140, AT3G48040, AT3G50500, AT3G55530, AT3G59380, AT4G01060, AT4G09570, AT4G26080, AT5G01810, AT5G06100, AT5G08335, AT5G10720, AT5G23320, AT5G57050, AT5G60410, AT5G64750, AT5G66880, ATCDPK2, ATHB-6, At1g52920, At2g32460, At2g39550, At4g23450, BGLU18, DOR, DWA1, DWA2, EIN2, GP ALPHA 1, NAC002, PED1, PKL, PLDALPHA1, PP2AA1, PP2CA, PYL8, RHA2A, TTL1]"/>
    <att type="string" name="Associated Genes Found0" value="[AT3G50500, AT4G01060, AT4G26080, AT5G57050]"/>
    <att type="string" name="GOGroups0" value="[Group11, Group16, Group5]"/>
    <att type="string" name="GOID0" value="GO:0009787"/>
    <att type="string" name="GOLevels0" value="[5]"/>
    <att type="string" name="GOTerm0" value="regulation of abscisic acid mediated signaling pathway"/>
    <att type="string" name="Group PValue Corrected with Bonferroni0" value="{Group11=1.5686285002411636E-22, Group16=6.128750210897452E-6, Group5=2.6136523534972203E-9}"/>
    <att type="string" name="Group PValue0" value="{Group11=9.227226472006844E-24, Group16=3.605147182880854E-7, Group5=1.5374425608807179E-10}"/>
    <att type="integer" name="Nr. Genes0" value="4"/>
    <att type="string" name="Ontology Source0" value="GO_BiologicalProcess_05.05.2011_16h22"/>
    <att type="string" name="OverViewTerm0" value="FALSE"/>
    <att type="real" name="Term PValue Corrected with Bonferroni0" value="0.2845191509556112"/>
    <att type="real" name="Term PValue0" value="0.0019095245030577932"/>
    <att type="string" name="canonicalName" value="GO:00097870"/>
    <graphics type="ELLIPSE" h="29.99993896484375" w="30.0" x="744.7740478515625" y="513.5647888183594" fill="#02068d" width="1" outline="#000000"/>
  </node>
  <node label="GO:00097560" id="-71">
    <att type="real" name="% Associated Genes0" value="6.25"/>
    <att type="string" name="All Associated Genes0" value="[ASL2, AT1G05630, AT1G16540, AT1G45249, AT1G52340, AT1G56650, AT1G66340, AT1G76030, AT1G78580, AT2G19860, AT2G36270, AT2G40220, AT3G20770, AT3G51770, AT4G02060, AT4G15900, AT5G03730, AT5G45830, AT5G46210, AT5G64930, At3g26090, At5g67030, BT2, EIN2, GATA21, HXK1, KIN10, LBA1, PSB29, RPT5B, SIS3, SR45]"/>
    <att type="string" name="Associated Genes Found0" value="[AT1G78580, AT2G19860]"/>
    <att type="string" name="GOGroups0" value="[Group3, Group4]"/>
    <att type="string" name="GOID0" value="GO:0009756"/>
    <att type="string" name="GOLevels0" value="[3, 4, 5, 6]"/>
    <att type="string" name="GOTerm0" value="carbohydrate mediated signaling"/>
    <att type="string" name="Group PValue Corrected with Bonferroni0" value="{Group3=1.4156565253701234E-4, Group4=0.0036532098882545404}"/>
    <att type="string" name="Group PValue0" value="{Group3=8.327391325706609E-6, Group4=2.1489469930909062E-4}"/>
    <att type="integer" name="Nr. Genes0" value="2"/>
    <att type="string" name="Ontology Source0" value="GO_BiologicalProcess_05.05.2011_16h22"/>
    <att type="string" name="OverViewTerm0" value="FALSE"/>
    <att type="real" name="Term PValue Corrected with Bonferroni0" value="1.0"/>
    <att type="real" name="Term PValue0" value="0.07035955889051548"/>
    <att type="string" name="canonicalName" value="GO:00097560"/>
    <graphics type="ELLIPSE" h="30.0" w="30.0" x="412.8535461425781" y="1721.4013671875" fill="#98e702" width="1" outline="#000000"/>
  </node>
  <node label="GO:00097530" id="-70">
    <att type="real" name="% Associated Genes0" value="5.98802375793457"/>
    <att type="string" name="All Associated Genes0" value="[ABCG40, AFPH2, AT1G01060, AT1G14920, AT1G15750, AT1G17440, AT1G18570, AT1G19180, AT1G55020, AT1G56650, AT1G61120, AT1G66350, AT1G66370, AT1G66380, AT1G70700, AT1G72450, AT1G74950, AT2G01570, AT2G18790, AT2G24210, AT2G39940, AT2G43790, AT2G46410, AT2G46830, AT3G03450, AT3G05420, AT3G06490, AT3G15210, AT3G23050, AT3G27810, AT3G50660, AT4G01060, AT4G01370, AT4G02570, AT4G11260, AT4G11280, AT4G14110, AT4G22880, AT4G26850, AT4G30210, AT4G34710, AT4G38620, AT4g35770, AT5G07700, AT5G10280, AT5G13220, AT5G13930, AT5G15310, AT5G27380, AT5G40350, AT5G42650, AT5G47220, AT5G55120, AT5G59780, AT5G60410, AT5G61420, ATMKK3, ATR1, ATTRB2, At1g06180, At1g06910, At1g08810/F22O13_32, At1g17520/F1L3_25, At1g25540, At1g28290, At1g32230, At1g47510, At1g49010, At1g51360, At1g53130, At1g57560, At1g58220/F16M22_4, At1g70000, At1g74430/F1M20_11, At1g79180, At2g14580, At2g24850, At2g28900, At2g31180, At2g34810, At2g44050, At3g01530/F4P13_8, At3g09600, At3g09940, At3g16350, At3g16470, At3g23250, At4g01280, At4g05100, At4g12670, At4g37760, At5g07010, At5g07690, At5g11270, At5g18860, At5g37260, At5g47390, At5g52660, BT2, BT4, C7A1000, CESA4, DHAR1, DOF1, ERF012, ERF094, ERF113, ERF1B, ESP, EXT1, F1I16_140, F23N20, F25A49, F6a148, F9D160, GB1, GLIP2, GORK, GRXC9, IRX1, JAR1, LECRKS2, LOX2, LOX3, MYB32, MYB44, MYB6, NAC055, NAC081, NRT1, PDF1A, PEP1, PEP4, PEPR1, PEPR2, PTR3-A, RAP1, RAP2-3, RAP2-6, RAX2, RCA, RML1, RNS1, SAS1, SOT16, SS1, SYP121, SYP122, T16H570, T16K500, T20K1250, THI2, TIFY 5B, TIFY11A, TIFY6B, TPS03, TRB1, TSB1, UPL5, VSP1, VSP2, WRKY50, WRKY51, WRKY70, cyt1, hsr1, lcl1]"/>
    <att type="string" name="Associated Genes Found0" value="[AT1G15750, AT1G18570, AT1G19180, AT1G70700, AT1G72450, AT1G74950, AT3G23050, AT4G01060, AT4G11280, AT5G13220]"/>
    <att type="string" name="GOGroups0" value="[Group15]"/>
    <att type="string" name="GOID0" value="GO:0009753"/>
    <att type="string" name="GOLevels0" value="[3, 4]"/>
    <att type="string" name="GOTerm0" value="response to jasmonic acid stimulus"/>
    <att type="string" name="Group PValue Corrected with Bonferroni0" value="{Group15=7.871587599059506E-7}"/>
    <att type="string" name="Group PValue0" value="{Group15=4.6303456465055917E-8}"/>
    <att type="integer" name="Nr. Genes0" value="10"/>
    <att type="string" name="Ontology Source0" value="GO_BiologicalProcess_05.05.2011_16h22"/>
    <att type="string" name="OverViewTerm0" value="FALSE"/>
    <att type="real" name="Term PValue Corrected with Bonferroni0" value="0.014995548483335322"/>
    <att type="real" name="Term PValue0" value="1.0064126498882766E-4"/>
    <att type="string" name="canonicalName" value="GO:00097530"/>
    <graphics type="ELLIPSE" h="50.0" w="50.0" x="1291.8984375" y="1393.5693359375" fill="#9c0e2d" width="1" outline="#000000"/>
  </node>
  <node label="GO:00097460" id="-69">
    <att type="real" name="% Associated Genes0" value="6.896551609039307"/>
    <att type="string" name="All Associated Genes0" value="[AT1G31930, AT1G45249, AT1G52340, AT1G72320, AT1G76030, AT2G19450, AT2G19860, AT2G40220, AT3G08550, AT3G47340, AT4G15900, AT4G34390, AT5G03730, AT5G57090, AT5G64750, At1g20950/F9H16, At1g43670, At1g74670, At2g28900, At3g26090, At5g41670, C7A1040, CIPK8, GATA21, GP ALPHA 1, GPT2, HXK1, RPT5B, XLG]"/>
    <att type="string" name="Associated Genes Found0" value="[AT2G19860, AT3G47340]"/>
    <att type="string" name="GOGroups0" value="[Group1, Group11, Group13, Group3, Group4]"/>
    <att type="string" name="GOID0" value="GO:0009746"/>
    <att type="string" name="GOLevels0" value="[6]"/>
    <att type="string" name="GOTerm0" value="response to hexose stimulus"/>
    <att type="string" name="Group PValue Corrected with Bonferroni0" value="{Group1=0.11288642812032629, Group11=1.5686285002411636E-22, Group13=8.207728626942202E-5, Group3=1.4156565253701234E-4, Group4=0.0036532098882545404}"/>
    <att type="string" name="Group PValue0" value="{Group1=0.0066403781247250755, Group11=9.227226472006844E-24, Group13=4.828075662907178E-6, Group3=8.327391325706609E-6, Group4=2.1489469930909062E-4}"/>
    <att type="integer" name="Nr. Genes0" value="2"/>
    <att type="string" name="Ontology Source0" value="GO_BiologicalProcess_05.05.2011_16h22"/>
    <att type="string" name="OverViewTerm0" value="FALSE"/>
    <att type="real" name="Term PValue Corrected with Bonferroni0" value="1.0"/>
    <att type="real" name="Term PValue0" value="0.05912866743905815"/>
    <att type="string" name="canonicalName" value="GO:00097460"/>
    <graphics type="ELLIPSE" h="30.0" w="30.000030517578125" x="167.01565551757812" y="1150.253173828125" fill="#1cf83d" width="1" outline="#000000"/>
  </node>
  <node label="GO:00097000" id="-66">
    <att type="real" name="% Associated Genes0" value="55.55555725097656"/>
    <att type="string" name="All Associated Genes0" value="[AT2G22330, AT2G30770, AT2G38470, AT2G43790, AT3G26830, AT3G45640, AT4G39950, At1g73500/T9L24_8, RML1]"/>
    <att type="string" name="Associated Genes Found0" value="[AT2G22330, AT2G30770, AT3G26830, AT3G45640, AT4G39950]"/>
    <att type="string" name="GOGroups0" value="[Group11]"/>
    <att type="string" name="GOID0" value="GO:0009700"/>
    <att type="string" name="GOLevels0" value="[4, 5, 6]"/>
    <att type="string" name="GOTerm0" value="indole phytoalexin biosynthetic process"/>
    <att type="string" name="Group PValue Corrected with Bonferroni0" value="{Group11=1.5686285002411636E-22}"/>
    <att type="string" name="Group PValue0" value="{Group11=9.227226472006844E-24}"/>
    <att type="integer" name="Nr. Genes0" value="5"/>
    <att type="string" name="Ontology Source0" value="GO_BiologicalProcess_05.05.2011_16h22"/>
    <att type="string" name="OverViewTerm0" value="FALSE"/>
    <att type="real" name="Term PValue Corrected with Bonferroni0" value="8.134025338267946E-6"/>
    <att type="real" name="Term PValue0" value="5.459077408233521E-8"/>
    <att type="string" name="canonicalName" value="GO:00097000"/>
    <graphics type="ELLIPSE" h="50.0" w="50.0" x="921.4765625" y="1067.0908203125" fill="#02068d" width="1" outline="#000000"/>
  </node>
  <node label="GO:00096950" id="-65">
    <att type="real" name="% Associated Genes0" value="11.11111068725586"/>
    <att type="string" name="All Associated Genes0" value="[4CLL5, 4CLL7, 4CLL9, AT1G13280, AT1G76690, AT2G44810, AT3G25760, AT3G25770, AT3G25780, AT4G16760, AT4G29010, AT5G42650, At1g61850, DGL, LOX2, OPR1, OPR3, PED1]"/>
    <att type="string" name="Associated Genes Found0" value="[AT3G25780, AT4G16760]"/>
    <att type="string" name="GOGroups0" value="[Group2]"/>
    <att type="string" name="GOID0" value="GO:0009695"/>
    <att type="string" name="GOLevels0" value="[6, 7, 8, 9, 10]"/>
    <att type="string" name="GOTerm0" value="jasmonic acid biosynthetic process"/>
    <att type="string" name="Group PValue Corrected with Bonferroni0" value="{Group2=2.667419925045739E-10}"/>
    <att type="string" name="Group PValue0" value="{Group2=1.5690705441445522E-11}"/>
    <att type="integer" name="Nr. Genes0" value="2"/>
    <att type="string" name="Ontology Source0" value="GO_BiologicalProcess_05.05.2011_16h22"/>
    <att type="string" name="OverViewTerm0" value="FALSE"/>
    <att type="real" name="Term PValue Corrected with Bonferroni0" value="1.0"/>
    <att type="real" name="Term PValue0" value="0.02455977535165873"/>
    <att type="string" name="canonicalName" value="GO:00096950"/>
    <graphics type="ELLIPSE" h="30.0" w="30.000015258789062" x="260.3180465698242" y="426.7197265625" fill="#4d1a74" width="1" outline="#000000"/>
  </node>
  <node label="GO:00096940" id="-64">
    <att type="real" name="% Associated Genes0" value="9.090909004211426"/>
    <att type="string" name="All Associated Genes0" value="[4CLL5, 4CLL7, 4CLL9, AT1G13280, AT1G19640, AT1G76690, AT2G44810, AT3G25760, AT3G25770, AT3G25780, AT4G16760, AT4G29010, AT5G42650, At1g61850, At5g07010, C7A1010, DGL, JAR1, LOX2, OPR1, OPR3, PED1]"/>
    <att type="string" name="Associated Genes Found0" value="[AT3G25780, AT4G16760]"/>
    <att type="string" name="GOGroups0" value="[Group2]"/>
    <att type="string" name="GOID0" value="GO:0009694"/>
    <att type="string" name="GOLevels0" value="[6, 7, 9]"/>
    <att type="string" name="GOTerm0" value="jasmonic acid metabolic process"/>
    <att type="string" name="Group PValue Corrected with Bonferroni0" value="{Group2=2.667419925045739E-10}"/>
    <att type="string" name="Group PValue0" value="{Group2=1.5690705441445522E-11}"/>
    <att type="integer" name="Nr. Genes0" value="2"/>
    <att type="string" name="Ontology Source0" value="GO_BiologicalProcess_05.05.2011_16h22"/>
    <att type="string" name="OverViewTerm0" value="FALSE"/>
    <att type="real" name="Term PValue Corrected with Bonferroni0" value="1.0"/>
    <att type="real" name="Term PValue0" value="0.03578609771760703"/>
    <att type="string" name="canonicalName" value="GO:00096940"/>
    <graphics type="ELLIPSE" h="30.0" w="30.000030517578125" x="390.2763214111328" y="547.4434204101562" fill="#4d1a74" width="1" outline="#000000"/>
  </node>
  <node label="GO:00096930" id="-63">
    <att type="real" name="% Associated Genes0" value="14.285714149475098"/>
    <att type="string" name="All Associated Genes0" value="[AT1G01480, AT1G05010, AT1G62380, AT2G19590, AT2G22810, AT3G15010, AT3G49700, AT4G08040, AT4G11280, AT4G26200, AT4G37770, AT5G65800, At1g12010, At1g73500/T9L24_8, At1g77330, At2g41060, OASB, PIL6, RUB1, SAM1, T8M16_190]"/>
    <att type="string" name="Associated Genes Found0" value="[AT1G05010, AT1G62380, AT4G11280]"/>
    <att type="string" name="GOGroups0" value="[Group8]"/>
    <att type="string" name="GOID0" value="GO:0009693"/>
    <att type="string" name="GOLevels0" value="[5]"/>
    <att type="string" name="GOTerm0" value="ethylene biosynthetic process"/>
    <att type="string" name="Group PValue Corrected with Bonferroni0" value="{Group8=1.9149650656212817E-4}"/>
    <att type="string" name="Group PValue0" value="{Group8=1.126450038600754E-5}"/>
    <att type="integer" name="Nr. Genes0" value="3"/>
    <att type="string" name="Ontology Source0" value="GO_BiologicalProcess_05.05.2011_16h22"/>
    <att type="string" name="OverViewTerm0" value="FALSE"/>
    <att type="real" name="Term PValue Corrected with Bonferroni0" value="0.4142843458740269"/>
    <att type="real" name="Term PValue0" value="0.0027804318515035364"/>
    <att type="string" name="canonicalName" value="GO:00096930"/>
    <graphics type="ELLIPSE" h="30.0" w="30.0" x="1768.0" y="1358.0" fill="#8bac27" width="1" outline="#000000"/>
  </node>
  <node label="GO:00096920" id="-62">
    <att type="real" name="% Associated Genes0" value="14.285714149475098"/>
    <att type="string" name="All Associated Genes0" value="[AT1G01480, AT1G05010, AT1G62380, AT2G19590, AT2G22810, AT3G15010, AT3G49700, AT4G08040, AT4G11280, AT4G26200, AT4G37770, AT5G65800, At1g12010, At1g73500/T9L24_8, At1g77330, At2g41060, OASB, PIL6, RUB1, SAM1, T8M16_190]"/>
    <att type="string" name="Associated Genes Found0" value="[AT1G05010, AT1G62380, AT4G11280]"/>
    <att type="string" name="GOGroups0" value="[Group8]"/>
    <att type="string" name="GOID0" value="GO:0009692"/>
    <att type="string" name="GOLevels0" value="[4]"/>
    <att type="string" name="GOTerm0" value="ethylene metabolic process"/>
    <att type="string" name="Group PValue Corrected with Bonferroni0" value="{Group8=1.9149650656212817E-4}"/>
    <att type="string" name="Group PValue0" value="{Group8=1.126450038600754E-5}"/>
    <att type="integer" name="Nr. Genes0" value="3"/>
    <att type="string" name="Ontology Source0" value="GO_BiologicalProcess_05.05.2011_16h22"/>
    <att type="string" name="OverViewTerm0" value="FALSE"/>
    <att type="real" name="Term PValue Corrected with Bonferroni0" value="0.4142843458740269"/>
    <att type="real" name="Term PValue0" value="0.0027804318515035364"/>
    <att type="string" name="canonicalName" value="GO:00096920"/>
    <graphics type="ELLIPSE" h="30.0" w="30.000244140625" x="1798.0" y="1323.0" fill="#8bac27" width="1" outline="#000000"/>
  </node>
  <node label="GO:00096840" id="-61">
    <att type="real" name="% Associated Genes0" value="20.0"/>
    <att type="string" name="All Associated Genes0" value="[AT2G22330, AT4G39950, At1g08980, At4g24670, CYP83B1, NIT1, NIT2, RTY/SUR1, TAA1, TSB1]"/>
    <att type="string" name="Associated Genes Found0" value="[AT2G22330, AT4G39950]"/>
    <att type="string" name="GOGroups0" value="[Group11]"/>
    <att type="string" name="GOID0" value="GO:0009684"/>
    <att type="string" name="GOLevels0" value="[5, 6, 7, 8]"/>
    <att type="string" name="GOTerm0" value="indoleacetic acid biosynthetic process"/>
    <att type="string" name="Group PValue Corrected with Bonferroni0" value="{Group11=1.5686285002411636E-22}"/>
    <att type="string" name="Group PValue0" value="{Group11=9.227226472006844E-24}"/>
    <att type="integer" name="Nr. Genes0" value="2"/>
    <att type="string" name="Ontology Source0" value="GO_BiologicalProcess_05.05.2011_16h22"/>
    <att type="string" name="OverViewTerm0" value="FALSE"/>
    <att type="real" name="Term PValue Corrected with Bonferroni0" value="1.0"/>
    <att type="real" name="Term PValue0" value="0.007759255761273985"/>
    <att type="string" name="canonicalName" value="GO:00096840"/>
    <graphics type="ELLIPSE" h="30.0" w="30.0" x="829.0" y="1059.0" fill="#02068d" width="1" outline="#000000"/>
  </node>
  <node label="GO:00096830" id="-60">
    <att type="real" name="% Associated Genes0" value="18.18181800842285"/>
    <att type="string" name="All Associated Genes0" value="[AT2G22330, AT4G39950, At1g08980, At3g10870, At4g24670, CYP83B1, NIT1, NIT2, RTY/SUR1, TAA1, TSB1]"/>
    <att type="string" name="Associated Genes Found0" value="[AT2G22330, AT4G39950]"/>
    <att type="string" name="GOGroups0" value="[Group11]"/>
    <att type="string" name="GOID0" value="GO:0009683"/>
    <att type="string" name="GOLevels0" value="[4, 5, 6, 7]"/>
    <att type="string" name="GOTerm0" value="indoleacetic acid metabolic process"/>
    <att type="string" name="Group PValue Corrected with Bonferroni0" value="{Group11=1.5686285002411636E-22}"/>
    <att type="string" name="Group PValue0" value="{Group11=9.227226472006844E-24}"/>
    <att type="integer" name="Nr. Genes0" value="2"/>
    <att type="string" name="Ontology Source0" value="GO_BiologicalProcess_05.05.2011_16h22"/>
    <att type="string" name="OverViewTerm0" value="FALSE"/>
    <att type="real" name="Term PValue Corrected with Bonferroni0" value="1.0"/>
    <att type="real" name="Term PValue0" value="0.00939875803023577"/>
    <att type="string" name="canonicalName" value="GO:00096830"/>
    <graphics type="ELLIPSE" h="30.0" w="30.0" x="889.0" y="1090.0" fill="#02068d" width="1" outline="#000000"/>
  </node>
  <node label="GO:00096440" id="-59">
    <att type="real" name="% Associated Genes0" value="8.69565200805664"/>
    <att type="string" name="All Associated Genes0" value="[AT1G01470, AT1G07600, AT1G74310, AT2G41430, AT2G47180, AT3G15850, AT3G51910, AT3G59770, AT3G63350, AT5G09810, AT5G57050, ATHSFA2, ATJ13, At1g17870, At1g27730, At2g17840, At2g22240, At2g32120, At2g46240, At5g61510, CAO, DEGP7, FAD6, FTSH11, HSC70-4, HSP17, HSP17B, HSP18, HSP25, HSP26, LOX3, NAC078, OHP, PAP12, PED1, PGR5, PSBO1, PSBO2, RPL23AA, RPL23AB, SEP1, T21L840, T4C940, VAR1, VAR2, VTE1]"/>
    <att type="string" name="Associated Genes Found0" value="[AT1G74310, AT2G41430, AT3G15850, AT5G57050]"/>
    <att type="string" name="GOGroups0" value="[Group5]"/>
    <att type="string" name="GOID0" value="GO:0009644"/>
    <att type="string" name="GOLevels0" value="[6]"/>
    <att type="string" name="GOTerm0" value="response to high light intensity"/>
    <att type="string" name="Group PValue Corrected with Bonferroni0" value="{Group5=2.6136523534972203E-9}"/>
    <att type="string" name="Group PValue0" value="{Group5=1.5374425608807179E-10}"/>
    <att type="integer" name="Nr. Genes0" value="4"/>
    <att type="string" name="Ontology Source0" value="GO_BiologicalProcess_05.05.2011_16h22"/>
    <att type="string" name="OverViewTerm0" value="FALSE"/>
    <att type="real" name="Term PValue Corrected with Bonferroni0" value="0.5240630768080357"/>
    <att type="real" name="Term PValue0" value="0.0035172018577720515"/>
    <att type="string" name="canonicalName" value="GO:00096440"/>
    <graphics type="ELLIPSE" h="30.000030517578125" w="30.0" x="821.0617065429688" y="302.9235076904297" fill="#61b34b" width="1" outline="#000000"/>
  </node>
  <node label="GO:00096420" id="-58">
    <att type="real" name="% Associated Genes0" value="7.792207717895508"/>
    <att type="string" name="All Associated Genes0" value="[AHL22, AT1G01470, AT1G02340, AT1G02580, AT1G07600, AT1G09570, AT1G31812, AT1G74310, AT2G18790, AT2G27820, AT2G32950, AT2G41430, AT2G46990, AT2G47180, AT3G15850, AT3G47340, AT3G51910, AT3G59770, AT3G61140, AT3G63350, AT5G09810, AT5G46110, AT5G57050, ATBCB, ATHB-52, ATHSFA2, ATJ13, At1g17870, At1g27730, At2g17840, At2g22240, At2g32120, At2g43400, At2g46240, At5g61510, CAO, CHIB1, CML12, CYP20-3, DEGP7, F25C20, FAD6, FTSH11, GCR1, GDH1, GP ALPHA 1, GPT2, HMA1, HSC70-4, HSP17, HSP17B, HSP18, HSP25, HSP26, LOX3, NAC078, NFXL1, OHP, PAP12, PED1, PGR5, PSBO1, PSBO2, RPL23AA, RPL23AB, RPN12A, SEP1, T15K4, T21L840, T4C940, TCH2, VAR1, VAR2, VTE1, XTH4, Zat12, secA]"/>
    <att type="string" name="Associated Genes Found0" value="[AT1G74310, AT2G41430, AT3G15850, AT3G47340, AT5G46110, AT5G57050]"/>
    <att type="string" name="GOGroups0" value="[Group5]"/>
    <att type="string" name="GOID0" value="GO:0009642"/>
    <att type="string" name="GOLevels0" value="[5]"/>
    <att type="string" name="GOTerm0" value="response to light intensity"/>
    <att type="string" name="Group PValue Corrected with Bonferroni0" value="{Group5=2.6136523534972203E-9}"/>
    <att type="string" name="Group PValue0" value="{Group5=1.5374425608807179E-10}"/>
    <att type="integer" name="Nr. Genes0" value="6"/>
    <att type="string" name="Ontology Source0" value="GO_BiologicalProcess_05.05.2011_16h22"/>
    <att type="string" name="OverViewTerm0" value="FALSE"/>
    <att type="real" name="Term PValue Corrected with Bonferroni0" value="0.0952792415270343"/>
    <att type="real" name="Term PValue0" value="6.394579968257336E-4"/>
    <att type="string" name="canonicalName" value="GO:00096420"/>
    <graphics type="ELLIPSE" h="49.99993896484375" w="50.0" x="808.529296875" y="404.562255859375" fill="#61b34b" width="1" outline="#000000"/>
  </node>
  <node label="GO:00096360" id="-57">
    <att type="real" name="% Associated Genes0" value="8.333333015441895"/>
    <att type="string" name="All Associated Genes0" value="[AKR4C8, AKR4C9, AT1G77760, AT1G80460, AT2G03800, AT5G22300, AT5G35750, At1g52827, At4g01070, CSR 1, F9D160, HMA1, HMA5, JAR1, MTPA2, NFXL1, NIA2, NRT1, PNG1, TRX3, TRX5, gst, oas5, psbA]"/>
    <att type="string" name="Associated Genes Found0" value="[AT1G77760, AT5G22300]"/>
    <att type="string" name="GOGroups0" value="[None]"/>
    <att type="string" name="GOID0" value="GO:0009636"/>
    <att type="string" name="GOLevels0" value="[3]"/>
    <att type="string" name="GOTerm0" value="response to toxin"/>
    <att type="string" name="Group PValue Corrected with Bonferroni0" value="{None=NaN}"/>
    <att type="string" name="Group PValue0" value="{None=NaN}"/>
    <att type="integer" name="Nr. Genes0" value="2"/>
    <att type="string" name="Ontology Source0" value="GO_BiologicalProcess_05.05.2011_16h22"/>
    <att type="string" name="OverViewTerm0" value="FALSE"/>
    <att type="real" name="Term PValue Corrected with Bonferroni0" value="1.0"/>
    <att type="real" name="Term PValue0" value="0.04200713495966533"/>
    <att type="string" name="canonicalName" value="GO:00096360"/>
    <graphics type="ELLIPSE" h="30.0" w="30.0" x="75.0" y="2748.0" fill="#ffffff" width="1" outline="#000000"/>
  </node>
  <node label="GO:00096260" id="-56">
    <att type="real" name="% Associated Genes0" value="4.878048896789551"/>
    <att type="string" name="All Associated Genes0" value="[AT1G02860, AT1G12220, AT1G33560, AT1G51660, AT2G43790, AT3G20600, AT3G21220, AT3G45640, AT3G48090, AT4G12720, AT5G06950, AT5G51700, AT5G54250, ATHCHIB, ATPAP1, At1g28380, At1g71220, At2g20310, At2g26560/T9J223, At4g02640, At4g20380, At4g36290, CPR30, CRK13, CRT3, CYP18-3, DND1, EFR, FMO1, HSR2, RIN4, RPH8A, RPM1, RPP13, RPP8, RPS2, RPS4, SHM1, T19K24, TGA3, TTR1]"/>
    <att type="string" name="Associated Genes Found0" value="[AT1G12220, AT3G45640]"/>
    <att type="string" name="GOGroups0" value="[Group17]"/>
    <att type="string" name="GOID0" value="GO:0009626"/>
    <att type="string" name="GOLevels0" value="[4, 5]"/>
    <att type="string" name="GOTerm0" value="plant-type hypersensitive response"/>
    <att type="string" name="Group PValue Corrected with Bonferroni0" value="{Group17=0.0032000058459379366}"/>
    <att type="string" name="Group PValue0" value="{Group17=1.8823563799634922E-4}"/>
    <att type="integer" name="Nr. Genes0" value="2"/>
    <att type="string" name="Ontology Source0" value="GO_BiologicalProcess_05.05.2011_16h22"/>
    <att type="string" name="OverViewTerm0" value="FALSE"/>
    <att type="real" name="Term PValue Corrected with Bonferroni0" value="1.0"/>
    <att type="real" name="Term PValue0" value="0.10755020586468675"/>
    <att type="string" name="canonicalName" value="GO:00096260"/>
    <graphics type="ELLIPSE" h="30.0" w="30.0" x="1439.8892822265625" y="755.4031372070312" fill="#7774fd" width="1" outline="#000000"/>
  </node>
  <node label="GO:00096170" id="-55">
    <att type="real" name="% Associated Genes0" value="6.854838848114014"/>
    <att type="string" name="All Associated Genes0" value="[ABCG36, AT1G01580, AT1G02450, AT1G02860, AT1G08720, AT1G12220, AT1G12820, AT1G16540, AT1G18570, AT1G19180, AT1G24100, AT1G27320, AT1G33520, AT1G33960, AT1G56360, AT1G61120, AT1G66340, AT1G74710, AT1G80460, AT1G80840, AT2G17310, AT2G22330, AT2G24570, AT2G25000, AT2G26330, AT2G27040, AT2G30770, AT2G38470, AT2G39940, AT2G41430, AT2G41560, AT2G43790, AT3G15210, AT3G20600, AT3G20770, AT3G26810, AT3G26830, AT3G28930, AT3G44880, AT3G45640, AT3G57330, AT3G62980, AT4G03190, AT4G11850, AT4G12720, AT4G14400, AT4G15900, AT4G19660, AT4G23190, AT4G26070, AT4G26850, AT4G31550, AT4G31800, AT4G33950, AT4G35450, AT4G39090, AT4G39950, AT4g09650, AT5G03760, AT5G10720, AT5G13160, AT5G40990, AT5G44070, AT5G47220, AT5G51700, AT5G59890, AT5G60410, ATCOX17, ATGSTF6, ATGSTF8, ATL55, ATMKK3, ATNRAMP4, ATOZI1, At1g02120, At1g07360, At1g09340, At1g13440, At1g18350, At1g26630, At1g32060, At1g32230, At1g51890, At1g52740, At1g53130, At1g53240, At1g65930, At1g73260, At2g03440, At2g17265, At2g20310, At2g22240, At2g25110, At2g30860, At2g34690, At2g37660, At2g40000, At3g01280, At3g15020, At3g17210, At3g55800, At3g57240, At4g01050, At4g08900, At4g14465/FCAALL96, At4g36290, At4g37460/F6G17_110, At5g06290, At5g06320, At5g09230, At5g17880, At5g19510, At5g33340, At5g37055, At5g44510, At5g46470, At5g48810, At5g56360, At5g57490, At5g60600, At5g63840, At5g64440, At5g67500, BAK1, BAS1, BGLU26, CA1, CAD7, CAD8, CAF1-11, CAF1-9, CALS12, CESA4, CRK13, CRK19, CRK20, CRK4, CRK5, CRRSP2, CRT3, CYP20-3, CYP38, CYP71A12, CYP83B1, EFR, EIL1, EIN2, EMB2024, ERF011, ESM1, ESP, F10M600, F14G92, F18E530, F22O6_190, F9D1640, FER1, FLS2, FMO1, GCA2, GH32, GLIP2, GRF6, GSTF7, H2AV, HEMC, HSC70-1, HSC70-2, HSC70-4, HSP90-1, HSP90-2, HSR2, IPK1, IRT1, IRX1, JAR1, K18P6, LECRKS2, LFNR1, LFNR2, LOX2, LOX4, MO1, MOS4, NFXL1, NPR3, NQR, NRAMP3, PAB2, PDH2, PEPR2, PER33, PER34, PIE1, PLDBETA1, PM24, POX1, PPA1, PR4, PRP19A, PRP19B, PRXIIE, PSBO1, PSBP1, PTR3-A, Q8L9L6, RAT5, RCA, RIN4, RML1, RPL12C, RPS2, RPS4, RRF, SAS1, SD113, SIRK, SODA, SODCC, SPL14, T16H50, T19F6, T9J146, TCTP, TGA1, TGA3, TGA4, TGA7, TIP1-2, TSA1, TUF, U2AF65A, WAKL10, WIN1, WIN2, WOL, WRKY27, WRKY38, WRKY48, WRKY51, WRKY52, WRKY53, WRKY62, WRKY70, WRKY8, cyp81F2, cyt1, petC]"/>
    <att type="string" name="Associated Genes Found0" value="[AT1G02450, AT1G12220, AT1G18570, AT1G19180, AT1G33960, AT2G22330, AT2G27040, AT2G30770, AT2G41430, AT3G26830, AT3G28930, AT3G44880, AT3G45640, AT4G31800, AT4G39950, AT5G03760, AT5G44070]"/>
    <att type="string" name="GOGroups0" value="[Group11]"/>
    <att type="string" name="GOID0" value="GO:0009617"/>
    <att type="string" name="GOLevels0" value="[3, 4]"/>
    <att type="string" name="GOTerm0" value="response to bacterium"/>
    <att type="string" name="Group PValue Corrected with Bonferroni0" value="{Group11=1.5686285002411636E-22}"/>
    <att type="string" name="Group PValue0" value="{Group11=9.227226472006844E-24}"/>
    <att type="integer" name="Nr. Genes0" value="17"/>
    <att type="string" name="Ontology Source0" value="GO_BiologicalProcess_05.05.2011_16h22"/>
    <att type="string" name="OverViewTerm0" value="FALSE"/>
    <att type="real" name="Term PValue Corrected with Bonferroni0" value="8.216185394808091E-6"/>
    <att type="real" name="Term PValue0" value="5.514218385777242E-8"/>
    <att type="string" name="canonicalName" value="GO:00096170"/>
    <graphics type="ELLIPSE" h="50.0" w="50.0" x="929.0" y="1146.0" fill="#02068d" width="1" outline="#000000"/>
  </node>
  <node label="GO:00096110" id="-54">
    <att type="real" name="% Associated Genes0" value="7.971014499664307"/>
    <att type="string" name="All Associated Genes0" value="[4CLL5, A0MF11, ABCC4, ABCG30, AIB, AT1G01470, AT1G05630, AT1G19640, AT1G22640, AT1G52030, AT1G61120, AT1G65060, AT1G66760, AT1G72450, AT1G74950, AT1G76690, AT1G80840, AT2G02860, AT2G22330, AT2G24210, AT2G28290, AT2G38900, AT2G39940, AT2G44810, AT3G23050, AT3G45640, AT3G61190, AT4G01370, AT4G08500, AT4G11280, AT4G13300, AT4G15090, AT4G16760, AT4G22880, AT4G34510, AT4G34710, AT4G38130, AT4G39980, AT4g08720, AT4g35770, AT5G09810, AT5G10300, AT5G13220, AT5G13930, AT5G40990, AT5G42650, ATHCHIB, At1g26630, At1g27730, At1g32920, At1g53165, At1g71697, At1g72920, At1g73500/T9L24_8, At2g24850, At2g28900, At2g30020, At2g34810, At2g38870, At2g38900, At3g11480, At3g14050, At3g16470, At4g02260, At4g10390, At4g15440, At4g16990, At4g24350, At4g37760, At5g18860, At5g43570, At5g43580, At5g53750, At5g54170, At5g63770/MBK55, BT2, BT4, CAF1-9, CHIB1, CIPK9, CML38, CPL1, CWINV1, CYS1, DGL, DOF1, EIN2, ELI5, ERF018, ERF094, EXT1, F3A400, F5D210, F9D160, FAR4, FAR5, GLR3, ILL4, ITPK2, JAR1, LECRKS2, LOX2, LOX3, LOX4, MYB102, NAC002, NAC081, NRT1, NRT3, NUDT8, OPR1, PDF1A, PED1, PEP1, PEPR1, PEPR2, PP2A13, PSKR1, PSKR2, PSYR1, PTR3-A, Q9LJB1, RAP1, RAP2-4, RAP2-6, RAT5, RNS1, ROF1, SOT16, SS1, T22A60, TPS03, TPS12, VSP2, WRKY20, ZKT, Zat12, syt]"/>
    <att type="string" name="Associated Genes Found0" value="[AT1G65060, AT1G66760, AT1G72450, AT1G74950, AT2G22330, AT3G23050, AT3G45640, AT4G11280, AT4G16760, AT4G39980, AT5G13220]"/>
    <att type="string" name="GOGroups0" value="[Group11, Group15]"/>
    <att type="string" name="GOID0" value="GO:0009611"/>
    <att type="string" name="GOLevels0" value="[3]"/>
    <att type="string" name="GOTerm0" value="response to wounding"/>
    <att type="string" name="Group PValue Corrected with Bonferroni0" value="{Group11=1.5686285002411636E-22, Group15=7.871587599059506E-7}"/>
    <att type="string" name="Group PValue0" value="{Group11=9.227226472006844E-24, Group15=4.6303456465055917E-8}"/>
    <att type="integer" name="Nr. Genes0" value="11"/>
    <att type="string" name="Ontology Source0" value="GO_BiologicalProcess_05.05.2011_16h22"/>
    <att type="string" name="OverViewTerm0" value="TRUE"/>
    <att type="real" name="Term PValue Corrected with Bonferroni0" value="4.519570377084637E-4"/>
    <att type="real" name="Term PValue0" value="3.0332687094527765E-6"/>
    <att type="string" name="canonicalName" value="GO:00096110"/>
    <graphics type="ELLIPSE" h="50.0" w="49.9998779296875" x="1111.4699096679688" y="1182.6612548828125" fill="#02068d" width="1" outline="#000000"/>
  </node>
  <node label="GO:00094150" id="-53">
    <att type="real" name="% Associated Genes0" value="4.34782600402832"/>
    <att type="string" name="All Associated Genes0" value="[ABCC4, AKR4C8, AKR4C9, ANN1, ANN2, ANN3, ANN4, ANNAT7, ANNAT8, AT1G01470, AT1G02730, AT1G05180, AT1G08720, AT1G08930, AT1G12480, AT1G20440, AT1G20450, AT1G27320, AT1G30270, AT1G33560, AT1G44170, AT1G45249, AT1G52340, AT1G54100, AT1G54160, AT1G56600, AT1G68090, AT1G69270, AT1G74920, AT2G05520, AT2G18960, AT2G30580, AT2G35930, AT2G36270, AT2G36640, AT2G38470, AT2G40220, AT2G41430, AT2G42620, AT2G46680, AT3G02130, AT3G06190, AT3G14440, AT3G19290, AT3G19580, AT3G20310, AT3G23050, AT3G24500, AT3G48170, AT3G50970, AT3G50980, AT3G51920, AT3G52450, AT3G55530, AT3G59380, AT3G61890, AT4G01420, AT4G08920, AT4G24960, AT4G25480, AT4G26070, AT4G33950, AT4G34000, AT4G34240, AT5G05410, AT5G08120, AT5G10220, AT5G15960, AT5G20520, AT5G35750, AT5G47120, AT5G48870, AT5G52300, AT5G52310, AT5G57050, AT5G58670, AT5G60410, AT5G66400, ATGSTF10, ATGSTF6, ATHB-6, ATHK1, ATsEH, AVP1, At1g05680, At1g08810/F22O13_32, At1g16060, At1g27730, At1g29395/F15D2_29, At1g32230, At1g60650, At1g69600, At1g80710, At2g04030, At2g17840, At2g33380/F4P95, At2g35300, At2g39550, At2g41010, At2g44060, At2g46140, At3g02480, At3g05640, At3g06010, At3g09940, At3g19600, At3g26090, At3g29320, At3g45930, At3g46970, At4g23450, At4g37840, At5g04280, At5g06760, At5g11270, At5g44650, At5g59220, At5g62470, At5g67030, BAM1, BGLU18, BHLH100, BPM1, BPM4, BPM5, CBL1, CBL9, CDSP32, CHIB1, COR413-PM1, CRY2, CYP707A3, CYS1, DI19-1, DOR, DREB2E, Dr4, ERD14, ERF107, ERF113, F22I1380, F25C20, F27K19_170, GORK, GPX3, GTL1, HD2C, HSP90-2, HVA22A, HVA22C, HVA22E, His1-3, IRX1, KIN2, LAC2, LTP2, LTP3, LTP4, LTP6, MYB44, NAC019, NAC055, NAC072, NFYB1, NRT1, P5CSA, PAL1, PER1, PER3, PGR5, PIP1-1, PIP1-2, PIP1-3, PIP1A, PIP2-1, PIP2-2, PIP2-3, PLDZETA, POM1, POX2, PP2CA, Q42253, RAP1, RAP2-1, RAP2-4, RAP2-6, RECQL1, RECQL5, RFS5, RH25, RH9, SAL1, SAP5, SHD, SIP3, SUGTL2, SUS1, T22F80, T22K7_60, T27I15_140, T9G5, WIN1, WOL, XDH1, XF1, XTH6, gst8]"/>
    <att type="string" name="Associated Genes Found0" value="[AT1G20450, AT1G44170, AT1G54100, AT2G41430, AT3G23050, AT3G61890, AT4G34240, AT5G05410, AT5G57050]"/>
    <att type="string" name="GOGroups0" value="[Group14, Group16]"/>
    <att type="string" name="GOID0" value="GO:0009415"/>
    <att type="string" name="GOLevels0" value="[3]"/>
    <att type="string" name="GOTerm0" value="response to water"/>
    <att type="string" name="Group PValue Corrected with Bonferroni0" value="{Group14=3.4516262904800604E-5, Group16=6.128750210897452E-6}"/>
    <att type="string" name="Group PValue0" value="{Group14=2.0303684061647416E-6, Group16=3.605147182880854E-7}"/>
    <att type="integer" name="Nr. Genes0" value="9"/>
    <att type="string" name="Ontology Source0" value="GO_BiologicalProcess_05.05.2011_16h22"/>
    <att type="string" name="OverViewTerm0" value="FALSE"/>
    <att type="real" name="Term PValue Corrected with Bonferroni0" value="0.32736909617821924"/>
    <att type="real" name="Term PValue0" value="0.00219710802804174"/>
    <att type="string" name="canonicalName" value="GO:00094150"/>
    <graphics type="ELLIPSE" h="30.0" w="30.0" x="1315.787109375" y="606.6539306640625" fill="#ce51ee" width="1" outline="#000000"/>
  </node>
  <node label="GO:00094140" id="-52">
    <att type="real" name="% Associated Genes0" value="4.522613048553467"/>
    <att type="string" name="All Associated Genes0" value="[ABCC4, AKR4C8, AKR4C9, ANN1, ANN2, ANN3, ANN4, ANNAT7, ANNAT8, AT1G01470, AT1G02730, AT1G05180, AT1G08720, AT1G08930, AT1G20440, AT1G20450, AT1G27320, AT1G30270, AT1G33560, AT1G44170, AT1G45249, AT1G52340, AT1G54100, AT1G54160, AT1G56600, AT1G68090, AT1G69270, AT1G74920, AT2G05520, AT2G18960, AT2G30580, AT2G35930, AT2G36270, AT2G38470, AT2G40220, AT2G41430, AT2G42620, AT2G46680, AT3G02130, AT3G06190, AT3G14440, AT3G19290, AT3G19580, AT3G20310, AT3G23050, AT3G24500, AT3G48170, AT3G50970, AT3G51920, AT3G52450, AT3G55530, AT3G59380, AT3G61890, AT4G01420, AT4G08920, AT4G24960, AT4G25480, AT4G26070, AT4G33950, AT4G34000, AT4G34240, AT5G05410, AT5G08120, AT5G10220, AT5G15960, AT5G35750, AT5G47120, AT5G48870, AT5G52300, AT5G52310, AT5G57050, AT5G58670, AT5G60410, AT5G66400, ATGSTF10, ATGSTF6, ATHB-6, ATHK1, ATsEH, AVP1, At1g05680, At1g08810/F22O13_32, At1g16060, At1g27730, At1g29395/F15D2_29, At1g32230, At1g60650, At1g69600, At1g80710, At2g04030, At2g17840, At2g33380/F4P95, At2g35300, At2g39550, At2g41010, At2g44060, At2g46140, At3g02480, At3g05640, At3g06010, At3g09940, At3g19600, At3g26090, At3g29320, At3g45930, At3g46970, At4g23450, At4g37840, At5g04280, At5g06760, At5g11270, At5g44650, At5g59220, At5g62470, At5g67030, BAM1, BGLU18, BHLH100, BPM1, BPM4, BPM5, CBL1, CBL9, CDSP32, CHIB1, COR413-PM1, CRY2, CYP707A3, CYS1, DI19-1, DOR, DREB2E, Dr4, ERD14, ERF107, ERF113, F25C20, F27K19_170, GORK, GPX3, GTL1, HD2C, HSP90-2, HVA22A, HVA22C, HVA22E, His1-3, IRX1, KIN2, LAC2, LTP2, LTP3, LTP4, LTP6, MYB44, NAC019, NAC055, NAC072, NFYB1, NRT1, P5CSA, PAL1, PER1, PER3, PGR5, PIP1-1, PIP1-2, PIP1-3, PIP1A, PIP2-1, PIP2-2, PIP2-3, PLDZETA, POM1, POX2, PP2CA, RAP1, RAP2-1, RAP2-4, RAP2-6, RECQL1, RECQL5, RFS5, RH25, RH9, SAL1, SAP5, SHD, SIP3, SUGTL2, T22K7_60, T27I15_140, T9G5, WIN1, WOL, XDH1, XF1, XTH6, gst8]"/>
    <att type="string" name="Associated Genes Found0" value="[AT1G20450, AT1G44170, AT1G54100, AT2G41430, AT3G23050, AT3G61890, AT4G34240, AT5G05410, AT5G57050]"/>
    <att type="string" name="GOGroups0" value="[Group14, Group16]"/>
    <att type="string" name="GOID0" value="GO:0009414"/>
    <att type="string" name="GOLevels0" value="[3, 4]"/>
    <att type="string" name="GOTerm0" value="response to water deprivation"/>
    <att type="string" name="Group PValue Corrected with Bonferroni0" value="{Group14=3.4516262904800604E-5, Group16=6.128750210897452E-6}"/>
    <att type="string" name="Group PValue0" value="{Group14=2.0303684061647416E-6, Group16=3.605147182880854E-7}"/>
    <att type="integer" name="Nr. Genes0" value="9"/>
    <att type="string" name="Ontology Source0" value="GO_BiologicalProcess_05.05.2011_16h22"/>
    <att type="string" name="OverViewTerm0" value="FALSE"/>
    <att type="real" name="Term PValue Corrected with Bonferroni0" value="0.25025824008594544"/>
    <att type="real" name="Term PValue0" value="0.0016795855039325196"/>
    <att type="string" name="canonicalName" value="GO:00094140"/>
    <graphics type="ELLIPSE" h="30.0" w="30.0" x="1457.085693359375" y="626.7255249023438" fill="#ce51ee" width="1" outline="#000000"/>
  </node>
  <node label="GO:00093120" id="-49">
    <att type="real" name="% Associated Genes0" value="8.108108520507812"/>
    <att type="string" name="All Associated Genes0" value="[AT1G06410, AT1G16980, AT1G17000, AT1G23870, AT1G68020, AT1G78580, AT2G24210, AT3G52340, AT4G17770, AT4G27550, AT4g12430, AT4g22590, AT4g39770, AT5G10100, AT5G24810, AT5g24810;F6A40, ATTPS11, ATTPS8, At1g35910, At1g43670, At1g78090, At2g05320, At2g22190, At3g55800, At4g39770/T19P19_160, At5g51460, At5g65140, AtTPPA, F16L1, GID1A, GID1B, GID1C, Q9FJQ1, SPP1, SPP3A, SPP3B, gnTII]"/>
    <att type="string" name="Associated Genes Found0" value="[AT1G23870, AT1G78580, AT4G17770]"/>
    <att type="string" name="GOGroups0" value="[Group11, Group3]"/>
    <att type="string" name="GOID0" value="GO:0009312"/>
    <att type="string" name="GOLevels0" value="[4, 5]"/>
    <att type="string" name="GOTerm0" value="oligosaccharide biosynthetic process"/>
    <att type="string" name="Group PValue Corrected with Bonferroni0" value="{Group11=1.5686285002411636E-22, Group3=1.4156565253701234E-4}"/>
    <att type="string" name="Group PValue0" value="{Group11=9.227226472006844E-24, Group3=8.327391325706609E-6}"/>
    <att type="integer" name="Nr. Genes0" value="3"/>
    <att type="string" name="Ontology Source0" value="GO_BiologicalProcess_05.05.2011_16h22"/>
    <att type="string" name="OverViewTerm0" value="FALSE"/>
    <att type="real" name="Term PValue Corrected with Bonferroni0" value="1.0"/>
    <att type="real" name="Term PValue0" value="0.01384535929296746"/>
    <att type="string" name="canonicalName" value="GO:00093120"/>
    <graphics type="ELLIPSE" h="30.0" w="30.0" x="683.3555297851562" y="1671.970703125" fill="#02068d" width="1" outline="#000000"/>
  </node>
  <node label="GO:00093110" id="-48">
    <att type="real" name="% Associated Genes0" value="4.411764621734619"/>
    <att type="string" name="All Associated Genes0" value="[AT1G06410, AT1G16980, AT1G17000, AT1G21270, AT1G23870, AT1G68020, AT1G73370, AT1G78580, AT2G24210, AT2G40840, AT3G52340, AT4G17770, AT4G27550, AT4G33950, AT4G38240, AT4g12430, AT4g22590, AT4g24040, AT4g39770, AT5G10100, AT5G24810, AT5g24810;F6A40, ATSPS2F, ATTPS11, ATTPS8, At1g04920, At1g24320, At1g35580, At1g35910, At1g43670, At1g67490, At1g73370, At1g78090, At2g05320, At2g22190, At3g03250, At3g55800, At4g02280, At4g09510, At4g39770/T19P19_160, At5g20280, At5g37180, At5g49190, At5g51460, At5g65140, AtTPPA, CWINV4, DPE1, F12B7, F16L1, F28M110, F3I66, F7K15_40, FBP, GID1A, GID1B, GID1C, MNS1, MNS2, MNS3, Q9FJQ1, RCP1, RFS2, SPP1, SPP3A, SPP3B, SUS1, gnTII]"/>
    <att type="string" name="Associated Genes Found0" value="[AT1G23870, AT1G78580, AT4G17770]"/>
    <att type="string" name="GOGroups0" value="[Group11, Group3]"/>
    <att type="string" name="GOID0" value="GO:0009311"/>
    <att type="string" name="GOLevels0" value="[4]"/>
    <att type="string" name="GOTerm0" value="oligosaccharide metabolic process"/>
    <att type="string" name="Group PValue Corrected with Bonferroni0" value="{Group11=1.5686285002411636E-22, Group3=1.4156565253701234E-4}"/>
    <att type="string" name="Group PValue0" value="{Group11=9.227226472006844E-24, Group3=8.327391325706609E-6}"/>
    <att type="integer" name="Nr. Genes0" value="3"/>
    <att type="string" name="Ontology Source0" value="GO_BiologicalProcess_05.05.2011_16h22"/>
    <att type="string" name="OverViewTerm0" value="FALSE"/>
    <att type="real" name="Term PValue Corrected with Bonferroni0" value="1.0"/>
    <att type="real" name="Term PValue0" value="0.0658714060912076"/>
    <att type="string" name="canonicalName" value="GO:00093110"/>
    <graphics type="ELLIPSE" h="30.0" w="30.0" x="746.3428955078125" y="1539.9248046875" fill="#02068d" width="1" outline="#000000"/>
  </node>
  <node label="GO:00093100" id="-47">
    <att type="real" name="% Associated Genes0" value="7.407407283782959"/>
    <att type="string" name="All Associated Genes0" value="[ALAAT1, AT1G06570, AT1G79440, AT2G16500, AT2G22330, AT3G47340, AT3g04520/T27C4_17, AT4G34710, AT4G39660, AT4G39950, AT5G04230, AT5G05920, AT5G37830, AT5G54080, AT5G62530, AT5G64813, At1g08630, At1g32470, At1g60990, At1g64660/F1N193, At1g75980, At2g30650, At2g30660, At2g35120, At2g43400, At3g22200, At4g12130, At4g29210, At4g33010, At4g39640, At4g39650, At5g36160, At5g46180, At5g63910, BCAT1, CHY1, ETFB, F28J1220, F28J1230, GDCSH, GDCST, MCCA, MCCB, PAL1, PAL2, PAL3, PAL4, PAO3, PAO4, PHYLLO, POX1, POX2, Q9LQR9, SDH]"/>
    <att type="string" name="Associated Genes Found0" value="[AT2G22330, AT3G47340, AT4G39950, AT5G54080]"/>
    <att type="string" name="GOGroups0" value="[Group11, Group2, Group4]"/>
    <att type="string" name="GOID0" value="GO:0009310"/>
    <att type="string" name="GOLevels0" value="[3, 4]"/>
    <att type="string" name="GOTerm0" value="amine catabolic process"/>
    <att type="string" name="Group PValue Corrected with Bonferroni0" value="{Group11=1.5686285002411636E-22, Group2=2.667419925045739E-10, Group4=0.0036532098882545404}"/>
    <att type="string" name="Group PValue0" value="{Group11=9.227226472006844E-24, Group2=1.5690705441445522E-11, Group4=2.1489469930909062E-4}"/>
    <att type="integer" name="Nr. Genes0" value="4"/>
    <att type="string" name="Ontology Source0" value="GO_BiologicalProcess_05.05.2011_16h22"/>
    <att type="string" name="OverViewTerm0" value="FALSE"/>
    <att type="real" name="Term PValue Corrected with Bonferroni0" value="0.933225825077485"/>
    <att type="real" name="Term PValue0" value="0.006263260570989832"/>
    <att type="string" name="canonicalName" value="GO:00093100"/>
    <graphics type="ELLIPSE" h="30.0" w="30.0" x="613.30859375" y="1039.09375" fill="#02068d" width="1" outline="#000000"/>
  </node>
  <node label="GO:00093090" id="-46">
    <att type="real" name="% Associated Genes0" value="4.819277286529541"/>
    <att type="string" name="All Associated Genes0" value="[AIH, AK2, AK3, AKHSDH1, AKHSDH2, ARD1, ARD2, ARD3, AT1G01480, AT1G08250, AT1G11790, AT1G17745, AT1G29410, AT1G52340, AT1G55920, AT1G62180, AT2G14750, AT2G16370, AT2G16500, AT2G22810, AT2G26310, AT2G27450, AT2G27820, AT2G29690, AT2G31810, AT2G39800, AT2G43090, AT3G02470, AT3G07630, AT3G23940, AT3G25900, AT3G29200, AT3G44720, AT3G47340, AT3G49700, AT3G59970, AT3G63250, AT4G04610, AT4G08040, AT4G11280, AT4G14720, AT4G14910, AT4G21990, AT4G26200, AT4G26483, AT4G27070, AT4G34570, AT4G34710, AT4G37770, AT4G39940, AT4G39980, AT4g34200, AT5G05590, AT5G05730, AT5G05920, AT5G10240, AT5G10920, AT5G13280, AT5G19530, AT5G22630, AT5G23020, AT5G27380, AT5G43850, AT5G48150, AT5G53120, AT5G57020, AT5G65010, AT5G65800, AT5G66230, ATR1, ATSERAT1, ATSERAT2, At1g07780, At1g09795/F21M129, At1g13950, At1g14810, At1g17745, At1g22410, At1g26630, At1g29410, At1g31860, At1g53520, At1g63660, At1g66200, At1g67990, At1g69370/F23O10_5, At1g69410, At1g79900, At1g80555, At2g03667, At2g04400, At2g05830, At2g17265, At2g17630, At2g19070, At2g19940, At2g21550, At2g21940, At2g22910, At2g26310, At2g26310/T1D16, At2g28880, At2g31810, At2g37250, At2g37500, At2g38670, At2g45300, At2g46110, At3g03630, At3g10030, At3g18680, At3g19480, At3g22425, At3g22460, At3g23940, At3g25570, At3g53180/T4D210, At3g55610, At3g55870, At3g57050, At3g58180, At3g58610, At4g14710, At4g14910, At4g24830, At4g26900, At4g30550, At4g33510, At4g35630, At4g39540/F23K16_170, At5g05270, At5g10330, At5g16290, At5g20980, At5g21060, At5g38530, At5g46180, At5g48840, At5g53850, At5g65010, At5g66120, AtATP-PRT1, AtcysD2, BCAT2, BCAT3, BCAT5, BCAT6, BIG, CARB, CHI1, CHI2, CIMS, CM2, CSR 1, CYP20-3, CYP83B1, Cyt ACS 1, DAP, DAPB1, DAPB2, DAPB3, DAPF, DHDPS1, DHDPS2, DHS2, EMB1144, F16M2_20, F19F1860, F27K19_50, F2A1930, FOLB1, GCN2, GCR1, GLN1-1, GLN1-2, GLN1-3, GLN1-4, GLN1-5, GLT1, GLU1, GLU2, GP ALPHA 1, GS2, HDH, HIS6, HMT3, HPA2, IIL1, IMDH1, IMDH2, IMDH3, IMPL2, IMS1, IPMS1, LYSA1, LYSA2, MEE32, METK3, METK4, MTK, MTN1, MTN2, MTO1, NAGK, NAS1, NAS2, NAS3, NAS4, NP_001078324, OASA1, OASB, OASC, OMR1, OTC, P5CSA, P5CSB, PAT, POX1, POX2, PROC1, PSP, Q41907, Q42021, Q8GW86, Q8LF92, Q9LG24, Q9LQU9, Q9LQY8, RML1, SAM1, SAM2, SAMDC1, SAMDC2, SAT2, SAT4, SPDSYN1, SPDSYN2, T24P22, T31P16_230, T4D210, T9J141, TS1, TS2, TSB1, TYRAAT1, TYRAAT2, WIN1, atms2, oas5]"/>
    <att type="string" name="Associated Genes Found0" value="[AT1G17745, AT3G44720, AT3G47340, AT3G59970, AT4G11280, AT4G21990, AT4G27070, AT4G39980, AT5G05730, AT5G10240, AT5G53120, AT5G65010]"/>
    <att type="string" name="GOGroups0" value="[Group11, Group13, Group2]"/>
    <att type="string" name="GOID0" value="GO:0009309"/>
    <att type="string" name="GOLevels0" value="[4, 5]"/>
    <att type="string" name="GOTerm0" value="amine biosynthetic process"/>
    <att type="string" name="Group PValue Corrected with Bonferroni0" value="{Group11=1.5686285002411636E-22, Group13=8.207728626942202E-5, Group2=2.667419925045739E-10}"/>
    <att type="string" name="Group PValue0" value="{Group11=9.227226472006844E-24, Group13=4.828075662907178E-6, Group2=1.5690705441445522E-11}"/>
    <att type="integer" name="Nr. Genes0" value="12"/>
    <att type="string" name="Ontology Source0" value="GO_BiologicalProcess_05.05.2011_16h22"/>
    <att type="string" name="OverViewTerm0" value="FALSE"/>
    <att type="real" name="Term PValue Corrected with Bonferroni0" value="0.024714968157170617"/>
    <att type="real" name="Term PValue0" value="1.658722695112122E-4"/>
    <att type="string" name="canonicalName" value="GO:00093090"/>
    <graphics type="ELLIPSE" h="50.0" w="49.999969482421875" x="332.5313262939453" y="887.5439453125" fill="#02068d" width="1" outline="#000000"/>
  </node>
  <node label="GO:00092690" id="-45">
    <att type="real" name="% Associated Genes0" value="16.66666603088379"/>
    <att type="string" name="All Associated Genes0" value="[AT1G01470, AT1G44170, AT1G54100, AT2G05520, At2g33380/F4P95, At2g44060, At2g46140, ERD14, PER1, PER3, RAP1, T22K7_60]"/>
    <att type="string" name="Associated Genes Found0" value="[AT1G44170, AT1G54100]"/>
    <att type="string" name="GOGroups0" value="[Group14]"/>
    <att type="string" name="GOID0" value="GO:0009269"/>
    <att type="string" name="GOLevels0" value="[4, 5]"/>
    <att type="string" name="GOTerm0" value="response to desiccation"/>
    <att type="string" name="Group PValue Corrected with Bonferroni0" value="{Group14=3.4516262904800604E-5}"/>
    <att type="string" name="Group PValue0" value="{Group14=2.0303684061647416E-6}"/>
    <att type="integer" name="Nr. Genes0" value="2"/>
    <att type="string" name="Ontology Source0" value="GO_BiologicalProcess_05.05.2011_16h22"/>
    <att type="string" name="OverViewTerm0" value="FALSE"/>
    <att type="real" name="Term PValue Corrected with Bonferroni0" value="1.0"/>
    <att type="real" name="Term PValue0" value="0.011177800074800352"/>
    <att type="string" name="canonicalName" value="GO:00092690"/>
    <graphics type="ELLIPSE" h="30.0" w="30.0" x="1359.6236572265625" y="683.9326782226562" fill="#ce51ee" width="1" outline="#000000"/>
  </node>
  <node label="GO:00092670" id="-44">
    <att type="real" name="% Associated Genes0" value="5.7971014976501465"/>
    <att type="string" name="All Associated Genes0" value="[AT1G27320, AT1G43700, AT1G55920, AT2G11810, AT2G19590, AT2G33770, AT2G45170, AT3G04530, AT3G16785, AT3G23430, AT3G47340, AT3G62980, AT4G00550, AT4G33030, AT4g04955, AT5G20410, AT5G60410, AT5G61420, ATG12A, ATG12B, ATR1, At1g09020, At1g13300, At1g23010/F19G10_5, At1g54210, At1g68320, At2g22240, At3g03250, At3g03520, At3g09922, At3g18290, At3g27740, At3g55880, At3g61710, At5g07690, At5g21040, At5g23630, At5g26880, At5g42870, At5g45380, At5g48850, BGLU21, BHLH32, BHLH47, CARB, CAT1, CAT2, CIPK9, F11F8_14, GTE10, NIT3, PAP12, PCKA, PHF1, PHO1-H1, PHT1-1, PHT1-2, PLDEPSILON, PLDP2, PS2, PYRB, PYRE-F, SPX2, SPX3, SULTR1, T21P5, UPP, WOL, WRKY6]"/>
    <att type="string" name="Associated Genes Found0" value="[AT2G33770, AT2G45170, AT3G16785, AT3G47340]"/>
    <att type="string" name="GOGroups0" value="[Group1, Group4]"/>
    <att type="string" name="GOID0" value="GO:0009267"/>
    <att type="string" name="GOLevels0" value="[4, 5, 6]"/>
    <att type="string" name="GOTerm0" value="cellular response to starvation"/>
    <att type="string" name="Group PValue Corrected with Bonferroni0" value="{Group1=0.11288642812032629, Group4=0.0036532098882545404}"/>
    <att type="string" name="Group PValue0" value="{Group1=0.0066403781247250755, Group4=2.1489469930909062E-4}"/>
    <att type="integer" name="Nr. Genes0" value="4"/>
    <att type="string" name="Ontology Source0" value="GO_BiologicalProcess_05.05.2011_16h22"/>
    <att type="string" name="OverViewTerm0" value="FALSE"/>
    <att type="real" name="Term PValue Corrected with Bonferroni0" value="1.0"/>
    <att type="real" name="Term PValue0" value="0.01462207114165606"/>
    <att type="string" name="canonicalName" value="GO:00092670"/>
    <graphics type="ELLIPSE" h="30.0" w="30.00003433227539" x="-18.110727310180664" y="1152.15869140625" fill="#1cf83d" width="1" outline="#000000"/>
  </node>
  <node label="GO:00090740" id="-43">
    <att type="real" name="% Associated Genes0" value="30.0"/>
    <att type="string" name="All Associated Genes0" value="[AT1G06570, AT2G22330, AT4G39950, AT5G04230, AT5G54080, At5g36160, PAL1, PAL2, PAL3, PAL4]"/>
    <att type="string" name="Associated Genes Found0" value="[AT2G22330, AT4G39950, AT5G54080]"/>
    <att type="string" name="GOGroups0" value="[Group11, Group2]"/>
    <att type="string" name="GOID0" value="GO:0009074"/>
    <att type="string" name="GOLevels0" value="[5, 6, 7, 8]"/>
    <att type="string" name="GOTerm0" value="aromatic amino acid family catabolic process"/>
    <att type="string" name="Group PValue Corrected with Bonferroni0" value="{Group11=1.5686285002411636E-22, Group2=2.667419925045739E-10}"/>
    <att type="string" name="Group PValue0" value="{Group11=9.227226472006844E-24, Group2=1.5690705441445522E-11}"/>
    <att type="integer" name="Nr. Genes0" value="3"/>
    <att type="string" name="Ontology Source0" value="GO_BiologicalProcess_05.05.2011_16h22"/>
    <att type="string" name="OverViewTerm0" value="FALSE"/>
    <att type="real" name="Term PValue Corrected with Bonferroni0" value="0.0417602812574313"/>
    <att type="real" name="Term PValue0" value="2.8027034400960606E-4"/>
    <att type="string" name="canonicalName" value="GO:00090740"/>
    <graphics type="ELLIPSE" h="50.0" w="50.0" x="708.0" y="1038.0" fill="#02068d" width="1" outline="#000000"/>
  </node>
  <node label="GO:00090730" id="-42">
    <att type="real" name="% Associated Genes0" value="9.756097793579102"/>
    <att type="string" name="All Associated Genes0" value="[AT1G08250, AT1G11790, AT1G29410, AT2G27820, AT2G29690, AT3G07630, AT3G29200, AT3G44720, AT4G27070, AT4G39980, AT5G05590, AT5G05730, AT5G22630, AT5G48150, ATR1, At1g07780, At1g22410, At1g29410, At1g69370/F23O10_5, At2g04400, At2g21940, At2g45300, At3g55870, At4g33510, At4g39540/F23K16_170, At5g38530, At5g66120, BIG, CM2, CYP83B1, DHS2, EMB1144, F27K19_50, GCR1, GP ALPHA 1, MEE32, PAT, T24P22, TSB1, TYRAAT1, TYRAAT2]"/>
    <att type="string" name="Associated Genes Found0" value="[AT3G44720, AT4G27070, AT4G39980, AT5G05730]"/>
    <att type="string" name="GOGroups0" value="[Group11, Group2]"/>
    <att type="string" name="GOID0" value="GO:0009073"/>
    <att type="string" name="GOLevels0" value="[5, 6, 7, 8]"/>
    <att type="string" name="GOTerm0" value="aromatic amino acid family biosynthetic process"/>
    <att type="string" name="Group PValue Corrected with Bonferroni0" value="{Group11=1.5686285002411636E-22, Group2=2.667419925045739E-10}"/>
    <att type="string" name="Group PValue0" value="{Group11=9.227226472006844E-24, Group2=1.5690705441445522E-11}"/>
    <att type="integer" name="Nr. Genes0" value="4"/>
    <att type="string" name="Ontology Source0" value="GO_BiologicalProcess_05.05.2011_16h22"/>
    <att type="string" name="OverViewTerm0" value="FALSE"/>
    <att type="real" name="Term PValue Corrected with Bonferroni0" value="0.3429426021130617"/>
    <att type="real" name="Term PValue0" value="0.0023016282021010854"/>
    <att type="string" name="canonicalName" value="GO:00090730"/>
    <graphics type="ELLIPSE" h="30.0" w="30.0" x="427.0" y="999.0" fill="#02068d" width="1" outline="#000000"/>
  </node>
  <node label="GO:00090720" id="-41">
    <att type="real" name="% Associated Genes0" value="14.516129493713379"/>
    <att type="string" name="All Associated Genes0" value="[AT1G05560, AT1G06570, AT1G08250, AT1G11790, AT1G29410, AT2G02390, AT2G22330, AT2G27820, AT2G29690, AT3G07630, AT3G29200, AT3G44720, AT4G27070, AT4G39950, AT4G39980, AT5G04230, AT5G05590, AT5G05730, AT5G22630, AT5G48150, AT5G48220, AT5G54080, ATR1, At1g07780, At1g12050, At1g22410, At1g29410, At1g69370/F23O10_5, At2g02380, At2g04400, At2g21940, At2g28880, At2g45300, At3g55870, At4g33510, At4g39540/F23K16_170, At5g36160, At5g38530, At5g48220, At5g57850, At5g66120, BIG, CM2, CYP83B1, DHS2, EMB1144, F12F1, F27K19_50, GCR1, GP ALPHA 1, MEE32, NP_001154311, PAL1, PAL2, PAL3, PAL4, PAT, SGT1, T24P22, TSB1, TYRAAT1, TYRAAT2]"/>
    <att type="string" name="Associated Genes Found0" value="[AT2G02390, AT2G22330, AT3G44720, AT4G27070, AT4G39950, AT4G39980, AT5G05730, AT5G48220, AT5G54080]"/>
    <att type="string" name="GOGroups0" value="[Group11, Group2]"/>
    <att type="string" name="GOID0" value="GO:0009072"/>
    <att type="string" name="GOLevels0" value="[4, 6, 7]"/>
    <att type="string" name="GOTerm0" value="aromatic amino acid family metabolic process"/>
    <att type="string" name="Group PValue Corrected with Bonferroni0" value="{Group11=1.5686285002411636E-22, Group2=2.667419925045739E-10}"/>
    <att type="string" name="Group PValue0" value="{Group11=9.227226472006844E-24, Group2=1.5690705441445522E-11}"/>
    <att type="integer" name="Nr. Genes0" value="9"/>
    <att type="string" name="Ontology Source0" value="GO_BiologicalProcess_05.05.2011_16h22"/>
    <att type="string" name="OverViewTerm0" value="FALSE"/>
    <att type="real" name="Term PValue Corrected with Bonferroni0" value="2.26559132491572E-5"/>
    <att type="real" name="Term PValue0" value="1.5205310905474632E-7"/>
    <att type="string" name="canonicalName" value="GO:00090720"/>
    <graphics type="ELLIPSE" h="50.0" w="50.0" x="568.0" y="941.0" fill="#02068d" width="1" outline="#000000"/>
  </node>
  <node label="GO:00090700" id="-40">
    <att type="real" name="% Associated Genes0" value="6.25"/>
    <att type="string" name="All Associated Genes0" value="[AT1G17745, AT1G55920, AT1G62180, AT2G14750, AT2G16370, AT4G04610, AT4G21990, AT4G34570, AT4G39940, AT4g34200, ATSERAT1, ATSERAT2, At1g17745, At2g17630, At2g21550, At3g03630, At3g19480, At3g22460, At4g35630, AtcysD2, CYP20-3, Cyt ACS 1, NP_001078324, OASA1, OASB, OASC, PSP, Q9LG24, SAT2, SAT4, T9J141, oas5]"/>
    <att type="string" name="Associated Genes Found0" value="[AT1G17745, AT4G21990]"/>
    <att type="string" name="GOGroups0" value="[Group0]"/>
    <att type="string" name="GOID0" value="GO:0009070"/>
    <att type="string" name="GOLevels0" value="[5, 6, 7, 8]"/>
    <att type="string" name="GOTerm0" value="serine family amino acid biosynthetic process"/>
    <att type="string" name="Group PValue Corrected with Bonferroni0" value="{Group0=1.3381211412481791E-5}"/>
    <att type="string" name="Group PValue0" value="{Group0=7.871300830871642E-7}"/>
    <att type="integer" name="Nr. Genes0" value="2"/>
    <att type="string" name="Ontology Source0" value="GO_BiologicalProcess_05.05.2011_16h22"/>
    <att type="string" name="OverViewTerm0" value="FALSE"/>
    <att type="real" name="Term PValue Corrected with Bonferroni0" value="1.0"/>
    <att type="real" name="Term PValue0" value="0.07035955889051548"/>
    <att type="string" name="canonicalName" value="GO:00090700"/>
    <graphics type="ELLIPSE" h="30.0" w="30.0" x="838.3511962890625" y="1498.7529296875" fill="#789f62" width="1" outline="#000000"/>
  </node>
  <node label="GO:00090670" id="-39">
    <att type="real" name="% Associated Genes0" value="8.333333015441895"/>
    <att type="string" name="All Associated Genes0" value="[AK2, AK3, AKHSDH1, AKHSDH2, ARD1, ARD2, ARD3, AT3G25900, AT3G47340, AT3G59970, AT3G63250, AT4G14720, AT5G10240, AT5G13280, AT5G43850, AT5G65010, At1g14810, At1g63660, At2g03667, At2g05830, At2g17265, At3g57050, At4g14710, At4g30550, At5g20980, At5g21060, At5g53850, At5g65010, CIMS, DAP, DAPB1, DAPB2, DAPB3, DAPF, DHDPS1, DHDPS2, HMT3, LYSA1, LYSA2, MTK, MTN1, MTN2, MTO1, Q8LF92, T31P16_230, TS1, TS2, atms2]"/>
    <att type="string" name="Associated Genes Found0" value="[AT3G47340, AT3G59970, AT5G10240, AT5G65010]"/>
    <att type="string" name="GOGroups0" value="[Group0, Group13, Group2, Group4]"/>
    <att type="string" name="GOID0" value="GO:0009067"/>
    <att type="string" name="GOLevels0" value="[5, 6, 7, 8]"/>
    <att type="string" name="GOTerm0" value="aspartate family amino acid biosynthetic process"/>
    <att type="string" name="Group PValue Corrected with Bonferroni0" value="{Group0=1.3381211412481791E-5, Group13=8.207728626942202E-5, Group2=2.667419925045739E-10, Group4=0.0036532098882545404}"/>
    <att type="string" name="Group PValue0" value="{Group0=7.871300830871642E-7, Group13=4.828075662907178E-6, Group2=1.5690705441445522E-11, Group4=2.1489469930909062E-4}"/>
    <att type="integer" name="Nr. Genes0" value="4"/>
    <att type="string" name="Ontology Source0" value="GO_BiologicalProcess_05.05.2011_16h22"/>
    <att type="string" name="OverViewTerm0" value="FALSE"/>
    <att type="real" name="Term PValue Corrected with Bonferroni0" value="0.611788758694914"/>
    <att type="real" name="Term PValue0" value="0.0041059648234557985"/>
    <att type="string" name="canonicalName" value="GO:00090670"/>
    <graphics type="ELLIPSE" h="30.0" w="30.0" x="1096.7569580078125" y="1379.7569580078125" fill="#789f62" width="1" outline="#000000"/>
  </node>
  <node label="GO:00090660" id="-38">
    <att type="real" name="% Associated Genes0" value="6.779661178588867"/>
    <att type="string" name="All Associated Genes0" value="[AK2, AK3, AKHSDH1, AKHSDH2, ARD1, ARD2, ARD3, AT1G62800, AT2G37550, AT2G44160, AT3G25900, AT3G47340, AT3G59970, AT3G63250, AT3g04520/T27C4_17, AT4G14720, AT4G31990, AT5G10240, AT5G11520, AT5G13280, AT5G19550, AT5G43850, AT5G65010, At1g08630, At1g14810, At1g63660, At1g64660/F1N193, At2g03667, At2g05830, At2g17265, At3g57050, At4g14710, At4g30550, At5g20980, At5g21060, At5g53850, At5g65010, CIMS, DAP, DAPB1, DAPB2, DAPB3, DAPF, DHDPS1, DHDPS2, HMT3, LYSA1, LYSA2, METK4, MTK, MTN1, MTN2, MTO1, Q8LF92, SDH, T31P16_230, TS1, TS2, atms2]"/>
    <att type="string" name="Associated Genes Found0" value="[AT3G47340, AT3G59970, AT5G10240, AT5G65010]"/>
    <att type="string" name="GOGroups0" value="[Group0, Group13, Group2, Group4]"/>
    <att type="string" name="GOID0" value="GO:0009066"/>
    <att type="string" name="GOLevels0" value="[4, 6, 7]"/>
    <att type="string" name="GOTerm0" value="aspartate family amino acid metabolic process"/>
    <att type="string" name="Group PValue Corrected with Bonferroni0" value="{Group0=1.3381211412481791E-5, Group13=8.207728626942202E-5, Group2=2.667419925045739E-10, Group4=0.0036532098882545404}"/>
    <att type="string" name="Group PValue0" value="{Group0=7.871300830871642E-7, Group13=4.828075662907178E-6, Group2=1.5690705441445522E-11, Group4=2.1489469930909062E-4}"/>
    <att type="integer" name="Nr. Genes0" value="4"/>
    <att type="string" name="Ontology Source0" value="GO_BiologicalProcess_05.05.2011_16h22"/>
    <att type="string" name="OverViewTerm0" value="FALSE"/>
    <att type="real" name="Term PValue Corrected with Bonferroni0" value="1.0"/>
    <att type="real" name="Term PValue0" value="0.008550727054507563"/>
    <att type="string" name="canonicalName" value="GO:00090660"/>
    <graphics type="ELLIPSE" h="30.0" w="30.0" x="1078.3885498046875" y="1471.890869140625" fill="#789f62" width="1" outline="#000000"/>
  </node>
  <node label="GO:00090630" id="-37">
    <att type="real" name="% Associated Genes0" value="7.843137264251709"/>
    <att type="string" name="All Associated Genes0" value="[ALAAT1, AT1G06570, AT1G79440, AT2G16500, AT2G22330, AT3G47340, AT3g04520/T27C4_17, AT4G34710, AT4G39660, AT4G39950, AT5G04230, AT5G37830, AT5G54080, AT5G62530, AT5G64813, At1g08630, At1g32470, At1g60990, At1g64660/F1N193, At1g75980, At2g30650, At2g30660, At2g35120, At2g43400, At3g22200, At4g12130, At4g29210, At4g33010, At4g39640, At4g39650, At5g36160, At5g46180, At5g63910, BCAT1, CHY1, ETFB, F28J1220, F28J1230, GDCSH, GDCST, MCCA, MCCB, PAL1, PAL2, PAL3, PAL4, PHYLLO, POX1, POX2, Q9LQR9, SDH]"/>
    <att type="string" name="Associated Genes Found0" value="[AT2G22330, AT3G47340, AT4G39950, AT5G54080]"/>
    <att type="string" name="GOGroups0" value="[Group11, Group2, Group4]"/>
    <att type="string" name="GOID0" value="GO:0009063"/>
    <att type="string" name="GOLevels0" value="[4, 5, 6, 7]"/>
    <att type="string" name="GOTerm0" value="cellular amino acid catabolic process"/>
    <att type="string" name="Group PValue Corrected with Bonferroni0" value="{Group11=1.5686285002411636E-22, Group2=2.667419925045739E-10, Group4=0.0036532098882545404}"/>
    <att type="string" name="Group PValue0" value="{Group11=9.227226472006844E-24, Group2=1.5690705441445522E-11, Group4=2.1489469930909062E-4}"/>
    <att type="integer" name="Nr. Genes0" value="4"/>
    <att type="string" name="Ontology Source0" value="GO_BiologicalProcess_05.05.2011_16h22"/>
    <att type="string" name="OverViewTerm0" value="FALSE"/>
    <att type="real" name="Term PValue Corrected with Bonferroni0" value="0.7611768940565466"/>
    <att type="real" name="Term PValue0" value="0.0051085697587687695"/>
    <att type="string" name="canonicalName" value="GO:00090630"/>
    <graphics type="ELLIPSE" h="30.0" w="30.0" x="639.26171875" y="1077.5703125" fill="#02068d" width="1" outline="#000000"/>
  </node>
  <node label="GO:00090620" id="-36">
    <att type="real" name="% Associated Genes0" value="13.636363983154297"/>
    <att type="string" name="All Associated Genes0" value="[AT1G03000, AT1G06290, AT1G79810, AT2G26350, AT3G07560, AT3G51840, AT4G16760, AT5G25760, AT5G65110, At1g65520, At3g01420/T13O15, At3g05290, At5g27520, At5g42890, At5g43280, ECH2, MFP2, PED1, PEX1, PEX12, dl3255c, dl3260c]"/>
    <att type="string" name="Associated Genes Found0" value="[AT3G51840, AT4G16760, AT5G65110]"/>
    <att type="string" name="GOGroups0" value="[Group11, Group2]"/>
    <att type="string" name="GOID0" value="GO:0009062"/>
    <att type="string" name="GOLevels0" value="[5, 6, 7, 8]"/>
    <att type="string" name="GOTerm0" value="fatty acid catabolic process"/>
    <att type="string" name="Group PValue Corrected with Bonferroni0" value="{Group11=1.5686285002411636E-22, Group2=2.667419925045739E-10}"/>
    <att type="string" name="Group PValue0" value="{Group11=9.227226472006844E-24, Group2=1.5690705441445522E-11}"/>
    <att type="integer" name="Nr. Genes0" value="3"/>
    <att type="string" name="Ontology Source0" value="GO_BiologicalProcess_05.05.2011_16h22"/>
    <att type="string" name="OverViewTerm0" value="FALSE"/>
    <att type="real" name="Term PValue Corrected with Bonferroni0" value="0.4749076361937524"/>
    <att type="real" name="Term PValue0" value="0.0031872995717701505"/>
    <att type="string" name="canonicalName" value="GO:00090620"/>
    <graphics type="ELLIPSE" h="30.0" w="30.0" x="566.0" y="670.0" fill="#02068d" width="1" outline="#000000"/>
  </node>
  <node label="GO:00086520" id="-35">
    <att type="real" name="% Associated Genes0" value="4.845815181732178"/>
    <att type="string" name="All Associated Genes0" value="[AK2, AK3, AKHSDH1, AKHSDH2, ARD1, ARD2, ARD3, AT1G01480, AT1G08250, AT1G11790, AT1G17745, AT1G29410, AT1G52340, AT1G55920, AT1G62180, AT2G14750, AT2G16370, AT2G22810, AT2G26310, AT2G27820, AT2G29690, AT2G31810, AT2G39800, AT2G43090, AT3G07630, AT3G23940, AT3G25900, AT3G29200, AT3G44720, AT3G47340, AT3G49700, AT3G59970, AT3G63250, AT4G04610, AT4G08040, AT4G11280, AT4G14720, AT4G14910, AT4G21990, AT4G26200, AT4G27070, AT4G34570, AT4G37770, AT4G39940, AT4G39980, AT4g34200, AT5G05590, AT5G05730, AT5G05920, AT5G10240, AT5G10920, AT5G13280, AT5G22630, AT5G23020, AT5G27380, AT5G43850, AT5G48150, AT5G65010, AT5G65800, AT5G66230, ATR1, ATSERAT1, ATSERAT2, At1g07780, At1g09795/F21M129, At1g13950, At1g14810, At1g17745, At1g22410, At1g26630, At1g29410, At1g31860, At1g53520, At1g63660, At1g66200, At1g69370/F23O10_5, At1g69410, At1g79900, At1g80555, At2g03667, At2g04400, At2g05830, At2g17265, At2g17630, At2g19940, At2g21550, At2g21940, At2g22910, At2g26310, At2g26310/T1D16, At2g28880, At2g31810, At2g37250, At2g37500, At2g45300, At2g46110, At3g03630, At3g10030, At3g18680, At3g19480, At3g22425, At3g22460, At3g23940, At3g53180/T4D210, At3g55610, At3g55870, At3g57050, At3g58180, At3g58610, At4g14710, At4g14910, At4g24830, At4g26900, At4g30550, At4g33510, At4g35630, At4g39540/F23K16_170, At5g05270, At5g10330, At5g16290, At5g20980, At5g21060, At5g38530, At5g46180, At5g48840, At5g53850, At5g65010, At5g66120, AtATP-PRT1, AtcysD2, BCAT2, BCAT3, BCAT5, BCAT6, BIG, CARB, CHI1, CHI2, CIMS, CM2, CSR 1, CYP20-3, CYP83B1, Cyt ACS 1, DAP, DAPB1, DAPB2, DAPB3, DAPF, DHDPS1, DHDPS2, DHS2, EMB1144, F16M2_20, F19F1860, F27K19_50, F2A1930, FOLB1, GCN2, GCR1, GLN1-1, GLN1-2, GLN1-3, GLN1-4, GLN1-5, GLT1, GLU1, GLU2, GP ALPHA 1, GS2, HDH, HIS6, HMT3, HPA2, IIL1, IMDH1, IMDH2, IMDH3, IMPL2, IMS1, IPMS1, LYSA1, LYSA2, MEE32, METK3, METK4, MTK, MTN1, MTN2, MTO1, NAGK, NP_001078324, OASA1, OASB, OASC, OMR1, OTC, P5CSA, P5CSB, PAT, POX1, POX2, PROC1, PSP, Q41907, Q42021, Q8LF92, Q9LG24, Q9LQU9, Q9LQY8, RML1, SAM1, SAM2, SAT2, SAT4, T24P22, T31P16_230, T4D210, T9J141, TS1, TS2, TSB1, TYRAAT1, TYRAAT2, WIN1, atms2, oas5]"/>
    <att type="string" name="Associated Genes Found0" value="[AT1G17745, AT3G44720, AT3G47340, AT3G59970, AT4G11280, AT4G21990, AT4G27070, AT4G39980, AT5G05730, AT5G10240, AT5G65010]"/>
    <att type="string" name="GOGroups0" value="[Group11, Group13, Group2]"/>
    <att type="string" name="GOID0" value="GO:0008652"/>
    <att type="string" name="GOLevels0" value="[4, 5, 6, 7]"/>
    <att type="string" name="GOTerm0" value="cellular amino acid biosynthetic process"/>
    <att type="string" name="Group PValue Corrected with Bonferroni0" value="{Group11=1.5686285002411636E-22, Group13=8.207728626942202E-5, Group2=2.667419925045739E-10}"/>
    <att type="string" name="Group PValue0" value="{Group11=9.227226472006844E-24, Group13=4.828075662907178E-6, Group2=1.5690705441445522E-11}"/>
    <att type="integer" name="Nr. Genes0" value="11"/>
    <att type="string" name="Ontology Source0" value="GO_BiologicalProcess_05.05.2011_16h22"/>
    <att type="string" name="OverViewTerm0" value="FALSE"/>
    <att type="real" name="Term PValue Corrected with Bonferroni0" value="0.04398060690178677"/>
    <att type="real" name="Term PValue0" value="2.951718584012535E-4"/>
    <att type="string" name="canonicalName" value="GO:00086520"/>
    <graphics type="ELLIPSE" h="50.0" w="50.0" x="281.6778564453125" y="858.17578125" fill="#02068d" width="1" outline="#000000"/>
  </node>
  <node label="GO:00070150" id="-34">
    <att type="real" name="% Associated Genes0" value="7.142857074737549"/>
    <att type="string" name="All Associated Genes0" value="[AT1G13180, AT2G22640, AT2G29890, AT3G30775, AT3G46010, AT3G57410, AT4G14147, AT4g01710, AT5G18410, At1g30825/T17H73, At2g30910, At2g31300, At2g39900, At2g45800, At2g46225, At3g61230, F14N23, F1I16_180, FH3, FH4, FH5, FH8, NAP1, PFN2, RPL3B, SCAR2, T1N69, dl3115c]"/>
    <att type="string" name="Associated Genes Found0" value="[AT3G30775, AT5G18410]"/>
    <att type="string" name="GOGroups0" value="[Group9]"/>
    <att type="string" name="GOID0" value="GO:0007015"/>
    <att type="string" name="GOLevels0" value="[4, 7]"/>
    <att type="string" name="GOTerm0" value="actin filament organization"/>
    <att type="string" name="Group PValue Corrected with Bonferroni0" value="{Group9=0.011180158214547965}"/>
    <att type="string" name="Group PValue0" value="{Group9=6.57656365561645E-4}"/>
    <att type="integer" name="Nr. Genes0" value="2"/>
    <att type="string" name="Ontology Source0" value="GO_BiologicalProcess_05.05.2011_16h22"/>
    <att type="string" name="OverViewTerm0" value="FALSE"/>
    <att type="real" name="Term PValue Corrected with Bonferroni0" value="1.0"/>
    <att type="real" name="Term PValue0" value="0.05553709718858124"/>
    <att type="string" name="canonicalName" value="GO:00070150"/>
    <graphics type="ELLIPSE" h="30.00006103515625" w="30.0" x="1851.2421875" y="638.0551452636719" fill="#d2a258" width="1" outline="#000000"/>
  </node>
  <node label="GO:00069140" id="-32">
    <att type="real" name="% Associated Genes0" value="21.7391300201416"/>
    <att type="string" name="All Associated Genes0" value="[AT1G62040, AT2G05630, AT2G45170, AT3G06420, AT3G15580, AT3G60640, AT4G04620, AT4G16520, AT4G21980, AT5G17290, AT5G45900, ATG12A, ATG12B, ATG3, ATG4A, ATG4B, At1g54210, At3g61710, At3g62770, AtAPG9, B0FZE0, T10C2140, TIP3-1]"/>
    <att type="string" name="Associated Genes Found0" value="[AT2G45170, AT3G06420, AT3G60640, AT4G04620, AT5G45900]"/>
    <att type="string" name="GOGroups0" value="[None]"/>
    <att type="string" name="GOID0" value="GO:0006914"/>
    <att type="string" name="GOLevels0" value="[4]"/>
    <att type="string" name="GOTerm0" value="autophagy"/>
    <att type="string" name="Group PValue Corrected with Bonferroni0" value="{None=NaN}"/>
    <att type="string" name="Group PValue0" value="{None=NaN}"/>
    <att type="integer" name="Nr. Genes0" value="5"/>
    <att type="string" name="Ontology Source0" value="GO_BiologicalProcess_05.05.2011_16h22"/>
    <att type="string" name="OverViewTerm0" value="FALSE"/>
    <att type="real" name="Term PValue Corrected with Bonferroni0" value="0.001858011577974544"/>
    <att type="real" name="Term PValue0" value="1.2469876362245261E-5"/>
    <att type="string" name="canonicalName" value="GO:00069140"/>
    <graphics type="ELLIPSE" h="50.0" w="50.0" x="150.0" y="2748.0" fill="#ffffff" width="1" outline="#000000"/>
  </node>
  <node label="GO:00068200" id="-31">
    <att type="real" name="% Associated Genes0" value="5.263157844543457"/>
    <att type="string" name="All Associated Genes0" value="[ABCC1, ALMT12, AT1G08090, AT1G12480, AT1G43700, AT2G29650, AT2G33770, AT2G47160, AT3G12520, AT3G23430, AT3G45650, AT4G35440, AT5G01340, AT5G12860, AT5G40890, AT5G44070, AT5G46110, AT5G49630, At1g16460, At1g79230, At2g01170, At2g25680, At2g26900, At2g34960, At2g47160, At4g21120, At5g62290, At5g62290/mmi9_110, BOR2, BOR3, BOR4, BOR5, BOR6, BOR7, FRD3, GPT1, GPT2, NIP1-1, NIP1-2, NIP2-1, NIP5-1, NIP6-1, NRT1, NRT3, PHF1, PHO1-H1, PHO1-H10, PHO1-H2, PHO1-H4, PHO1-H5, PHO1-H6, PHO1-H7, PHO1-H8, PHO1-H9, PHO1;H3, PHT1-1, PHT1-2, PHT1-3, PHT1-4, PHT1-5, PHT1-6, PHT1-7, PHT1-8, PHT1-9, PHT2-1, PPT1, PPT2, RDH2, SULTR1, SULTR2, SULTR3, SULTR4, WOL, XPT, YUP8H12R7, ccc]"/>
    <att type="string" name="Associated Genes Found0" value="[AT2G33770, AT5G12860, AT5G44070, AT5G46110]"/>
    <att type="string" name="GOGroups0" value="[Group1, Group11, Group12]"/>
    <att type="string" name="GOID0" value="GO:0006820"/>
    <att type="string" name="GOLevels0" value="[4, 5]"/>
    <att type="string" name="GOTerm0" value="anion transport"/>
    <att type="string" name="Group PValue Corrected with Bonferroni0" value="{Group1=0.11288642812032629, Group11=1.5686285002411636E-22, Group12=0.17002625782107086}"/>
    <att type="string" name="Group PValue0" value="{Group1=0.0066403781247250755, Group11=9.227226472006844E-24, Group12=0.010001544577710051}"/>
    <att type="integer" name="Nr. Genes0" value="4"/>
    <att type="string" name="Ontology Source0" value="GO_BiologicalProcess_05.05.2011_16h22"/>
    <att type="string" name="OverViewTerm0" value="TRUE"/>
    <att type="real" name="Term PValue Corrected with Bonferroni0" value="1.0"/>
    <att type="real" name="Term PValue0" value="0.0201677067690792"/>
    <att type="string" name="canonicalName" value="GO:00068200"/>
    <graphics type="ELLIPSE" h="30.0" w="30.0" x="201.8265380859375" y="1163.53955078125" fill="#1cf83d" width="1" outline="#000000"/>
  </node>
  <node label="GO:00067900" id="-30">
    <att type="real" name="% Associated Genes0" value="6.097560882568359"/>
[truncated: 874,081 more chars]
