# Supplementary material for: Molecular Signatures in Arabidopsis thaliana in Response to Insect Attack and Bacterial Infection
Source: PLOS journal article supplement (doi:10.1371/journal.pone.0058987), 2013-03-25
Supplement: S1 (10.1371/journal.pone.0058987.s001) [file journal.pone.0058987.s001 › CytoscapeSession-2011_06_01-13_25/cysession.xml]

<?xml version="1.0" encoding="UTF-8" standalone="yes"?>
<cysession xmlns:xlink="http://www.w3.org/1999/xlink" xmlns:xsi="http://www.w3.org/2001/XMLSchema-instance" documentVersion="0.9" id="CytoscapeSession-2011_06_01-13_25">
    <sessionNote>You can add note for this session here.</sessionNote>
    <sessionState>
        <desktop>
            <desktopSize height="1186" width="1936"/>
            <networkFrames>
                <networkFrame y="0" x="0" height="734" width="1230" frameID="ClueGO Results for Analysis0 (Kappa:0.3)"/>
            </networkFrames>
        </desktop>
        <server>
            <ontologyServer/>
        </server>
        <cytopanels>
            <cytopanel id="CytoPanel1">
                <panelState>dock</panelState>
                <selectedPanel>0</selectedPanel>
                <panels>
                    <panel id="test"/>
                </panels>
            </cytopanel>
            <cytopanel id="CytoPanel2">
                <panelState>dock</panelState>
                <selectedPanel>3</selectedPanel>
                <panels>
                    <panel id="test"/>
                </panels>
            </cytopanel>
            <cytopanel id="CytoPanel3">
                <panelState>dock</panelState>
                <selectedPanel>-1</selectedPanel>
                <panels>
                    <panel id="test"/>
                </panels>
            </cytopanel>
        </cytopanels>
    </sessionState>
    <networkTree>
        <network visualStyle="ClueGOVisualStyleForGroups_0" viewAvailable="true" id="ClueGO Results for Analysis0 (Kappa:0.3)" filename="ClueGO Results for Analysis0 (Kappa30.3).xgmml">
            <parent id="Network Root"/>
            <selectedEdges>
                <edge interaction="term-term" target="GO:00096110" source="GO:00097530" id="GO:00097530 (term-term) GO:00096110"/>
            </selectedEdges>
        </network>
        <network visualStyle="default" viewAvailable="false" id="Network Root" filename="Network Root.xgmml">
            <parent id="NULL"/>
            <child id="ClueGO Results for Analysis0 (Kappa:0.3)"/>
        </network>
    </networkTree>
</cysession>
