# Supplementary material for: Molecular Signatures in Arabidopsis thaliana in Response to Insect Attack and Bacterial Infection
Source: PLOS journal article supplement (doi:10.1371/journal.pone.0058987), 2013-03-25
Supplement: S1 (10.1371/journal.pone.0058987.s001) [file journal.pone.0058987.s001 › CytoscapeSession-2011_06_01-13_25/plugins/AttributeBrowserPlugin/attributeBrowser.props]

#Cytoscape Attribute Browser Plugin Properties
#Wed Jun 01 13:25:15 CEST 2011
attributeBrowser.edge.selectedAttr0=ID\t254
attributeBrowser.node.selectedAttr0=ID\t106
attributeBrowser.network.selectedAttr1=Value\t64
attributeBrowser.network.selectedAttr0=Network Attribute Name\t154
