# Supplementary material for: Molecular Signatures in Arabidopsis thaliana in Response to Insect Attack and Bacterial Infection
Source: PLOS journal article supplement (doi:10.1371/journal.pone.0058987), 2013-03-25
Supplement: S1 (10.1371/journal.pone.0058987.s001) [file journal.pone.0058987.s001 › CytoscapeSession-2011_06_01-13_25/plugins/FilterPlugin/session_filters.props]

FilterVersion=0.2
<Composite>
name=Default
<AdvancedSetting>
scope.global=false
scope.session=true
selection.node=false
selection.edge=false
edge.source=true
edge.target=true
Relation=AND
</AdvancedSetting>
Negation=false
</Composite>
