# Supplementary material for: Molecular Signatures in Arabidopsis thaliana in Response to Insect Attack and Bacterial Infection
Source: PLOS journal article supplement (doi:10.1371/journal.pone.0058987), 2013-03-25
Supplement: S1 (10.1371/journal.pone.0058987.s001) [file journal.pone.0058987.s001 › CytoscapeSession-2011_06_01-13_25/session_bookmarks.xml]

<?xml version="1.0" encoding="UTF-8" standalone="yes"?>
<bookmarks xmlns:ns2="http://www.w3.org/1999/xlink" version="0.5">
    <description>
		Bookmark file for Cytoscape 2.4 and later.
	</description>
    <category name="ontology">
        <dataSource ns2:href="http://www.geneontology.org/ontology/gene_ontology_edit.obo" name="Gene Ontology Full" format="obo">
            <attribute name="description">
				The Gene Ontology (GO) project provides a
				controlled vocabulary to describe gene and gene product attributes
				in any organism. This data source contains full size GO dag, which
				contains all GO terms. This OBO file is written in version 1.2
				format.
			</attribute>
            <attribute name="ontologyType">GO</attribute>
        </dataSource>
        <dataSource ns2:href="http://www.geneontology.org/GO_slims/goslim_generic.obo" name="Generic GO slim" format="obo">
            <attribute name="description">
				Subset of general GO Terms.
			</attribute>
            <attribute name="ontologyType">GO</attribute>
        </dataSource>
        <dataSource ns2:href="http://www.geneontology.org/GO_slims/goslim_yeast.obo" name="Yeast GO slim" format="obo">
            <attribute name="description">
				Subset of GO Terms for annotating Yeast
				data sets. Maintained by SGD.
			</attribute>
            <attribute name="ontologyType">GO</attribute>
        </dataSource>
        <dataSource ns2:href="http://obo.cvs.sourceforge.net/*checkout*/obo/obo/ontology/genomic-proteomic/molecule_role.obo" name="Molecule role (INOH Protein name/family name ontology)" format="obo">
            <attribute name="description">
				A structured controlled vocabulary of
				concrete protein names and generic (abstract) protein names. This
				ontology is a INOH pathway annotation ontology, one of a set of
				ontologies intended to be used in pathway data annotation to ease
				data integration. This ontology is used to annotate protein names,
				protein family names, generic/concrete protein names in the INOH
				pathway data.
				INOH is part of the BioPAX working group.
			</attribute>
        </dataSource>
        <dataSource ns2:href="http://obo.cvs.sourceforge.net/*checkout*/obo/obo/ontology/genomic-proteomic/event.obo" name="Event (INOH pathway ontology)" format="obo">
            <attribute name="description">
				A structured controlled vocabulary of
				pathway centric biological processes. This ontology is a INOH
				pathway annotation ontology, one of a set of ontologies intended to
				be used in pathway data annotation to ease data integration. This
				ontology is used to annotate biological processes, pathways,
				sub-pathways in the INOH pathway data.
				INOH is part of the BioPAX
				working group.
			</attribute>
        </dataSource>
        <dataSource ns2:href="http://obo.cvs.sourceforge.net/*checkout*/obo/obo/ontology/genomic-proteomic/protein/psi-mi.obo" name="Protein-protein interaction" format="obo">
            <attribute name="description">
				A structured controlled vocabulary for the
				annotation of experiments concerned with protein-protein
				interactions.
			</attribute>
        </dataSource>
        <dataSource ns2:href="http://obo.cvs.sourceforge.net/*checkout*/obo/obo/ontology/genomic-proteomic/pathway.obo" name="Pathway Ontology" format="obo">
            <attribute name="description">
				The Pathway Ontology is a controlled
				vocabulary for pathways that provides standard terms for the
				annotation of geneproducts.
			</attribute>
        </dataSource>
        <dataSource ns2:href="http://obo.cvs.sourceforge.net/*checkout*/obo/obo/ontology/phenotype/quality.obo" name="PATO" format="obo">
            <attribute name="description">
				PATO is an ontology of phenotypic
				qualities, intended for use in a number of applications, primarily
				phenotype annotation. For more information, please visit PATO wiki
				(http://www.bioontology.org/wiki/index.php/PATO:Main_Page). 
			</attribute>
        </dataSource>
        <dataSource ns2:href="http://obo.cvs.sourceforge.net/*checkout*/obo/obo/ontology/phenotype/mouse_pathology/mouse_pathology.obo" name="Mouse pathology" format="obo">
            <attribute name="description">
				Mouse Pathology Ontology (MPATH) is an
				ontology for mutant mouse pathology. This is Version 1.
			</attribute>
        </dataSource>
        <dataSource ns2:href="http://obo.cvs.sourceforge.net/*checkout*/obo/obo/ontology/phenotype/human_disease.obo" name="Human disease" format="obo">
            <attribute name="description">
				This ontology is a comprehensive
				hierarchical controlled vocabulary for human disease representation.
				For more information, please visit Disease Ontology website
				(http://diseaseontology.sourceforge.net/).
			</attribute>
        </dataSource>
        <category name="annotation">
            <dataSource ns2:href="http://www.geneontology.org/gene-associations/gene_association.jcvi_Aphagocytophilum.gz" name="Gene Association file for Anaplasma phagocytophilum HZ" format="Gene Association">
                <attribute name="curator">JCVI</attribute>
                <attribute name="species">Anaplasma phagocytophilum HZ</attribute>
            </dataSource>
            <dataSource ns2:href="http://www.geneontology.org/gene-associations/gene_association.PAMGO_Atumefaciens.gz" name="Gene Association file for Agrobacterium tumefaciensstr. C58" format="Gene Association">
                <attribute name="curator">PAMGO</attribute>
                <attribute name="species">Agrobacterium tumefaciensstr. C58</attribute>
            </dataSource>
            <dataSource ns2:href="http://www.geneontology.org/gene-associations/gene_association.tair.gz" name="Gene Association file for Arabidopsis thaliana" format="Gene Association">
                <attribute name="curator">TAIR/JCVI</attribute>
                <attribute name="species">Arabidopsis thaliana</attribute>
            </dataSource>
            <dataSource ns2:href="http://www.geneontology.org/gene-associations/gene_association.aspgd.gz" name="Gene Association file for Aspergillus nidulans" format="Gene Association">
                <attribute name="curator">AspGD</attribute>
                <attribute name="species">Aspergillus nidulans</attribute>
            </dataSource>
            <dataSource ns2:href="http://www.geneontology.org/gene-associations/gene_association.jcvi_Banthracis.gz" name="Gene Association file for Bacillus anthracis Ames" format="Gene Association">
                <attribute name="curator">JCVI</attribute>
                <attribute name="species">Bacillus anthracis Ames</attribute>
            </dataSource>
            <dataSource ns2:href="http://www.geneontology.org/gene-associations/gene_association.goa_cow.gz" name="Gene Association file for Bos taurus" format="Gene Association">
                <attribute name="curator">GO Annotations @ EBI</attribute>
                <attribute name="species">Bos taurus</attribute>
            </dataSource>
            <dataSource ns2:href="http://www.geneontology.org/gene-associations/gene_association.jcvi_Chydrogenoformans.gz" name="Gene Association file for Carboxydothermus hydrogenoformans Z-2901" format="Gene Association">
                <attribute name="curator">JCVI</attribute>
                <attribute name="species">Carboxydothermus hydrogenoformans Z-2901</attribute>
            </dataSource>
            <dataSource ns2:href="http://www.geneontology.org/gene-associations/gene_association.wb.gz" name="Gene Association file for Caenorhabditis elegans" format="Gene Association">
                <attribute name="curator">WormBase</attribute>
                <attribute name="species">Caenorhabditis elegans</attribute>
            </dataSource>
            <dataSource ns2:href="http://www.geneontology.org/gene-associations/gene_association.jcvi_Cjejuni.gz" name="Gene Association file for Campylobacter jejuni RM1221" format="Gene Association">
                <attribute name="curator">JCVI</attribute>
                <attribute name="species">Campylobacter jejuni RM1221</attribute>
            </dataSource>
            <dataSource ns2:href="http://www.geneontology.org/gene-associations/gene_association.cgd.gz" name="Gene Association file for Candida albicans" format="Gene Association">
                <attribute name="curator">CGD</attribute>
                <attribute name="species">Candida albicans</attribute>
            </dataSource>
            <dataSource ns2:href="http://www.geneontology.org/gene-associations/gene_association.jcvi_Cperfringens.gz" name="Gene Association file for Clostridium perfringens ATCC13124" format="Gene Association">
                <attribute name="curator">JCVI</attribute>
                <attribute name="species">Clostridium perfringens ATCC13124</attribute>
            </dataSource>
            <dataSource ns2:href="http://www.geneontology.org/gene-associations/gene_association.jcvi_Cpsychrerythraea.gz" name="Gene Association file for Colwellia psychrerythraea 34H" format="Gene Association">
                <attribute name="curator">JCVI</attribute>
                <attribute name="species">Colwellia psychrerythraea 34H</attribute>
            </dataSource>
            <dataSource ns2:href="http://www.geneontology.org/gene-associations/gene_association.jcvi_Cburnetii.gz" name="Gene Association file for Coxiella burnetii RSA 493" format="Gene Association">
                <attribute name="curator">JCVI</attribute>
                <attribute name="species">Coxiella burnetii RSA 493</attribute>
            </dataSource>
            <dataSource ns2:href="http://www.geneontology.org/gene-associations/gene_association.zfin.gz" name="Gene Association file for Danio rerio" format="Gene Association">
                <attribute name="curator">ZFIN</attribute>
                <attribute name="species">Danio rerio</attribute>
            </dataSource>
            <dataSource ns2:href="http://www.geneontology.org/gene-associations/gene_association.jcvi_Dethenogenes.gz" name="Gene Association file for Dehalococcoides ethenogenes 195" format="Gene Association">
                <attribute name="curator">JCVI</attribute>
                <attribute name="species">Dehalococcoides ethenogenes 195</attribute>
            </dataSource>
            <dataSource ns2:href="http://www.geneontology.org/gene-associations/gene_association.PAMGO_Ddadantii.gz" name="Gene Association file for Dickeya dadantii" format="Gene Association">
                <attribute name="curator">PAMGO</attribute>
                <attribute name="species">Dickeya dadantii</attribute>
            </dataSource>
            <dataSource ns2:href="http://www.geneontology.org/gene-associations/gene_association.dictyBase.gz" name="Gene Association file for Dictyostelium discoideum" format="Gene Association">
                <attribute name="curator">dictyBase</attribute>
                <attribute name="species">Dictyostelium discoideum</attribute>
            </dataSource>
            <dataSource ns2:href="http://www.geneontology.org/gene-associations/gene_association.fb.gz" name="Gene Association file for Drosophila melanogaster" format="Gene Association">
                <attribute name="curator">FlyBase</attribute>
                <attribute name="species">Drosophila melanogaster</attribute>
            </dataSource>
            <dataSource ns2:href="http://www.geneontology.org/gene-associations/gene_association.ecocyc.gz" name="Gene Association file for Escherichia coli" format="Gene Association">
                <attribute name="curator">EcoCyc and EcoliHub</attribute>
                <attribute name="species">Escherichia coli</attribute>
            </dataSource>
            <dataSource ns2:href="http://www.geneontology.org/gene-associations/gene_association.jcvi_Echaffeensis.gz" name="Gene Association file for Ehrlichia chaffeensis Arkansas" format="Gene Association">
                <attribute name="curator">JCVI</attribute>
                <attribute name="species">Ehrlichia chaffeensis Arkansas</attribute>
            </dataSource>
            <dataSource ns2:href="http://www.geneontology.org/gene-associations/gene_association.goa_chicken.gz" name="Gene Association file for Gallus gallus" format="Gene Association">
                <attribute name="curator">GO Annotations @ EBI</attribute>
                <attribute name="species">Gallus gallus</attribute>
            </dataSource>
            <dataSource ns2:href="http://www.geneontology.org/gene-associations/gene_association.jcvi_Gsulfurreducens.gz" name="Gene Association file for Geobacter sulfurreducens PCA" format="Gene Association">
                <attribute name="curator">JCVI</attribute>
                <attribute name="species">Geobacter sulfurreducens PCA</attribute>
            </dataSource>
            <dataSource ns2:href="http://www.geneontology.org/gene-associations/gene_association.goa_human.gz" name="Gene Association file for Homo sapiens" format="Gene Association">
                <attribute name="curator">GO Annotations @ EBI</attribute>
                <attribute name="species">Homo sapiens</attribute>
            </dataSource>
            <dataSource ns2:href="http://www.geneontology.org/gene-associations/gene_association.jcvi_Hneptunium.gz" name="Gene Association file for Hyphomonas neptunium ATCC 15444" format="Gene Association">
                <attribute name="curator">JCVI</attribute>
                <attribute name="species">Hyphomonas neptunium ATCC 15444</attribute>
            </dataSource>
            <dataSource ns2:href="http://www.geneontology.org/gene-associations/gene_association.GeneDB_Lmajor.gz" name="Gene Association file for Leishmania major" format="Gene Association">
                <attribute name="curator">Sanger GeneDB</attribute>
                <attribute name="species">Leishmania major</attribute>
            </dataSource>
            <dataSource ns2:href="http://www.geneontology.org/gene-associations/gene_association.jcvi_Lmonocytogenes.gz" name="Gene Association file for Listeria monocytogenes 4b F2365" format="Gene Association">
                <attribute name="curator">JCVI</attribute>
                <attribute name="species">Listeria monocytogenes 4b F2365</attribute>
            </dataSource>
            <dataSource ns2:href="http://www.geneontology.org/gene-associations/gene_association.PAMGO_Mgrisea.gz" name="Gene Association file for Magnaporthe grisea" format="Gene Association">
                <attribute name="curator">PAMGO</attribute>
                <attribute name="species">Magnaporthe grisea</attribute>
            </dataSource>
            <dataSource ns2:href="http://www.geneontology.org/gene-associations/gene_association.jcvi_Mcapsulatus.gz" name="Gene Association file for Methylococcus capsulatus Bath" format="Gene Association">
                <attribute name="curator">JCVI</attribute>
                <attribute name="species">Methylococcus capsulatus Bath</attribute>
            </dataSource>
            <dataSource ns2:href="http://www.geneontology.org/gene-associations/gene_association.mgi.gz" name="Gene Association file for Mus musculus" format="Gene Association">
                <attribute name="curator">MGI</attribute>
                <attribute name="species">Mus musculus</attribute>
            </dataSource>
            <dataSource ns2:href="http://www.geneontology.org/gene-associations/gene_association.jcvi_Nsennetsu.gz" name="Gene Association file for Neorickettsia sennetsu Miyayama" format="Gene Association">
                <attribute name="curator">JCVI</attribute>
                <attribute name="species">Neorickettsia sennetsu Miyayama</attribute>
            </dataSource>
            <dataSource ns2:href="http://www.geneontology.org/gene-associations/gene_association.PAMGO_Oomycetes.gz" name="Gene Association file for Oomycetes" format="Gene Association">
                <attribute name="curator">PAMGO</attribute>
                <attribute name="species">Oomycetes</attribute>
            </dataSource>
            <dataSource ns2:href="http://www.geneontology.org/gene-associations/gene_association.gramene_oryza.gz" name="Gene Association file for Oryza sativa" format="Gene Association">
                <attribute name="curator">Gramene</attribute>
                <attribute name="species">Oryza sativa</attribute>
            </dataSource>
            <dataSource ns2:href="http://www.geneontology.org/gene-associations/gene_association.goa_pdb.gz" name="Gene Association file for Protein Data Bank [multispecies]" format="Gene Association">
                <attribute name="curator">GO Annotations @ EBI</attribute>
                <attribute name="species">Protein Data Bank [multispecies]</attribute>
            </dataSource>
            <dataSource ns2:href="http://www.geneontology.org/gene-associations/gene_association.GeneDB_Pfalciparum.gz" name="Gene Association file for Plasmodium falciparum" format="Gene Association">
                <attribute name="curator">Sanger GeneDB</attribute>
                <attribute name="species">Plasmodium falciparum</attribute>
            </dataSource>
            <dataSource ns2:href="http://www.geneontology.org/gene-associations/gene_association.pseudocap.gz" name="Gene Association file for Pseudomonas aeruginosa PAO1" format="Gene Association">
                <attribute name="curator">PseudoCAP</attribute>
                <attribute name="species">Pseudomonas aeruginosa PAO1</attribute>
            </dataSource>
            <dataSource ns2:href="http://www.geneontology.org/gene-associations/gene_association.jcvi_Pfluorescens.gz" name="Gene Association file for Pseudomonas fluorescens Pf-5" format="Gene Association">
                <attribute name="curator">JCVI</attribute>
                <attribute name="species">Pseudomonas fluorescens Pf-5</attribute>
            </dataSource>
            <dataSource ns2:href="http://www.geneontology.org/gene-associations/gene_association.jcvi_Psyringae.gz" name="Gene Association file for Pseudomonas syringae DC3000" format="Gene Association">
                <attribute name="curator">JCVI</attribute>
                <attribute name="species">Pseudomonas syringae DC3000</attribute>
            </dataSource>
            <dataSource ns2:href="http://www.geneontology.org/gene-associations/gene_association.jcvi_Psyringae_phaseolicola.gz" name="Gene Association file for Pseudomonas syringae pv. phaseolicola 1448A" format="Gene Association">
                <attribute name="curator">JCVI</attribute>
                <attribute name="species">Pseudomonas syringae pv. phaseolicola
					1448A</attribute>
            </dataSource>
            <dataSource ns2:href="http://www.geneontology.org/gene-associations/gene_association.rgd.gz" name="Gene Association file for Rattus norvegicus" format="Gene Association">
                <attribute name="curator">RGD</attribute>
                <attribute name="species">Rattus norvegicus</attribute>
            </dataSource>
            <dataSource ns2:href="http://www.geneontology.org/gene-associations/gene_association.reactome.gz" name="Gene Association file for Reactome [multispecies]" format="Gene Association">
                <attribute name="curator">CSHL and EBI</attribute>
                <attribute name="species">Reactome [multispecies]</attribute>
            </dataSource>
            <dataSource ns2:href="http://www.geneontology.org/gene-associations/gene_association.sgd.gz" name="Gene Association file for Saccharomyces cerevisiae" format="Gene Association">
                <attribute name="curator">SGD</attribute>
                <attribute name="species">Saccharomyces cerevisiae</attribute>
            </dataSource>
            <dataSource ns2:href="http://www.geneontology.org/gene-associations/gene_association.GeneDB_Spombe.gz" name="Gene Association file for Schizosaccharomyces pombe" format="Gene Association">
                <attribute name="curator">Sanger GeneDB</attribute>
                <attribute name="species">Schizosaccharomyces pombe</attribute>
            </dataSource>
            <dataSource ns2:href="http://www.geneontology.org/gene-associations/gene_association.jcvi_Soneidensis.gz" name="Gene Association file for Shewanella oneidensis MR-1" format="Gene Association">
                <attribute name="curator">JCVI</attribute>
                <attribute name="species">Shewanella oneidensis MR-1</attribute>
            </dataSource>
            <dataSource ns2:href="http://www.geneontology.org/gene-associations/gene_association.jcvi_Spomeroyi.gz" name="Gene Association file for Silicibacter pomeroyi DSS-3" format="Gene Association">
                <attribute name="curator">JCVI</attribute>
                <attribute name="species">Silicibacter pomeroyi DSS-3</attribute>
            </dataSource>
            <dataSource ns2:href="http://www.geneontology.org/gene-associations/gene_association.sgn.gz" name="Gene Association file for Solanaceae" format="Gene Association">
                <attribute name="curator">SGN</attribute>
                <attribute name="species">Solanaceae</attribute>
            </dataSource>
            <dataSource ns2:href="http://www.geneontology.org/gene-associations/gene_association.GeneDB_Tbrucei.gz" name="Gene Association file for Trypanosoma brucei" format="Gene Association">
                <attribute name="curator">Sanger GeneDB</attribute>
                <attribute name="species">Trypanosoma brucei</attribute>
            </dataSource>
            <dataSource ns2:href="http://www.geneontology.org/gene-associations/gene_association.goa_uniprot_noiea.gz" name="Gene Association file for UniProt [multispecies] IEA annotations removed" format="Gene Association">
                <attribute name="curator">GO Annotations @ EBI</attribute>
                <attribute name="species">UniProt [multispecies] IEA annotations
					removed</attribute>
            </dataSource>
            <dataSource ns2:href="http://www.geneontology.org/gene-associations/gene_association.jcvi_Vcholerae.gz" name="Gene Association file for Vibrio cholerae" format="Gene Association">
                <attribute name="curator">JCVI</attribute>
                <attribute name="species">Vibrio cholerae</attribute>
            </dataSource>
        </category>
    </category>
    <category name="network">
        <dataSource ns2:href="http://chianti.ucsd.edu/kono/data/galFiltered.sif" name="Yeast Protein-Protein: Ideker, T. et al. (galFiltered.sif)" format="sif"/>
        <dataSource ns2:href="http://cytoscape.org/datasets/HPRD.sif" name="Human Protein-Protein: HPRD Literature Curated Interactions" format="sif"/>
        <dataSource ns2:href="http://cytoscape.org/datasets/rual.sif" name="Human Protein-Protein: Rual et al. Toward a proteome-scale map of the human protein-protein interaction network. Nature 2005." format="sif"/>
        <dataSource ns2:href="http://www.cytoscape.org/tut/getting.started/RUAL.subset.sif" name="Human Protein-Protein: Rual et al. (Subnetwork for tutorial)" format="sif"/>
        <dataSource ns2:href="http://cytoscape.org/datasets/stelzl.sif" name="Human Protein-Protein: Stelzl et al. A human protein-protein interaction network: a resource for annotating the proteome. Cell 2005." format="sif"/>
        <dataSource ns2:href="http://cytoscape.org/datasets/ptacek.sif" name="Yeast Protein-Protein: Ptacek et al. Global analysis of protein phosphorylation in yeast. Nature 2005" format="sif"/>
    </category>
    <category name="plugins">
        <dataSource ns2:href="http://cytoscape.org/plugins/plugins.xml" name="Cytoscape"/>
    </category>
</bookmarks>
