# Supplementary material for: Molecular Signatures in Arabidopsis thaliana in Response to Insect Attack and Bacterial Infection
Source: PLOS journal article supplement (doi:10.1371/journal.pone.0058987), 2013-03-25
Supplement: S1 (10.1371/journal.pone.0058987.s001) [file journal.pone.0058987.s001 › CytoscapeSession-2011_06_01-13_25/session_vizmap.props]

#This file specifies visual mappings for Cytoscape and has been automatically generated.
# WARNING: any changes you make to this file while Cytoscape is running may be overwritten.
# Any changes may make these visual mappings unreadable.
# Please make sure you know what you are doing before modifying this file by hand.
#
#Wed Jun 01 13:25:15 CEST 2011
edgeAppearanceCalculator.ClueGOVisualStyleForGroups_0.defaultEdgeColor=0,0,0
edgeAppearanceCalculator.ClueGOVisualStyleForGroups_0.defaultEdgeFont=SanSerif,plain,10
edgeAppearanceCalculator.ClueGOVisualStyleForGroups_0.defaultEdgeFontSize=10.0
edgeAppearanceCalculator.ClueGOVisualStyleForGroups_0.defaultEdgeLabel=
edgeAppearanceCalculator.ClueGOVisualStyleForGroups_0.defaultEdgeLabelColor=0,0,0
edgeAppearanceCalculator.ClueGOVisualStyleForGroups_0.defaultEdgeLabelOpacity=255
edgeAppearanceCalculator.ClueGOVisualStyleForGroups_0.defaultEdgeLabelPosition=C,C,c,0,0
edgeAppearanceCalculator.ClueGOVisualStyleForGroups_0.defaultEdgeLabelWidth=100.0
edgeAppearanceCalculator.ClueGOVisualStyleForGroups_0.defaultEdgeLineStyle=SOLID
edgeAppearanceCalculator.ClueGOVisualStyleForGroups_0.defaultEdgeLineWidth=1.0
edgeAppearanceCalculator.ClueGOVisualStyleForGroups_0.defaultEdgeOpacity=255
edgeAppearanceCalculator.ClueGOVisualStyleForGroups_0.defaultEdgeSourceArrowColor=0,0,0
edgeAppearanceCalculator.ClueGOVisualStyleForGroups_0.defaultEdgeSourceArrowOpacity=255
edgeAppearanceCalculator.ClueGOVisualStyleForGroups_0.defaultEdgeSourceArrowShape=NONE
edgeAppearanceCalculator.ClueGOVisualStyleForGroups_0.defaultEdgeTargetArrowColor=0,0,0
edgeAppearanceCalculator.ClueGOVisualStyleForGroups_0.defaultEdgeTargetArrowOpacity=255
edgeAppearanceCalculator.ClueGOVisualStyleForGroups_0.defaultEdgeTargetArrowShape=NONE
edgeAppearanceCalculator.ClueGOVisualStyleForGroups_0.defaultEdgeToolTip=
edgeAppearanceCalculator.ClueGOVisualStyleForGroups_0.defaultNodeBorderColor=0,0,0
edgeAppearanceCalculator.ClueGOVisualStyleForGroups_0.defaultNodeBorderOpacity=255
edgeAppearanceCalculator.ClueGOVisualStyleForGroups_0.defaultNodeFillColor=255,255,255
edgeAppearanceCalculator.ClueGOVisualStyleForGroups_0.defaultNodeFont=Default,plain,12
edgeAppearanceCalculator.ClueGOVisualStyleForGroups_0.defaultNodeFontSize=12.0
edgeAppearanceCalculator.ClueGOVisualStyleForGroups_0.defaultNodeHight=30.0
edgeAppearanceCalculator.ClueGOVisualStyleForGroups_0.defaultNodeLabel=
edgeAppearanceCalculator.ClueGOVisualStyleForGroups_0.defaultNodeLabelColor=0,0,0
edgeAppearanceCalculator.ClueGOVisualStyleForGroups_0.defaultNodeLabelOpacity=255
edgeAppearanceCalculator.ClueGOVisualStyleForGroups_0.defaultNodeLabelPosition=C,C,c,0,0
edgeAppearanceCalculator.ClueGOVisualStyleForGroups_0.defaultNodeLabelWidth=100.0
edgeAppearanceCalculator.ClueGOVisualStyleForGroups_0.defaultNodeLineStyle=SOLID
edgeAppearanceCalculator.ClueGOVisualStyleForGroups_0.defaultNodeLineWidth=1.0
edgeAppearanceCalculator.ClueGOVisualStyleForGroups_0.defaultNodeOpacity=255
edgeAppearanceCalculator.ClueGOVisualStyleForGroups_0.defaultNodeShape=rect
edgeAppearanceCalculator.ClueGOVisualStyleForGroups_0.defaultNodeShowNestedNetwork=true
edgeAppearanceCalculator.ClueGOVisualStyleForGroups_0.defaultNodeSize=35.0
edgeAppearanceCalculator.ClueGOVisualStyleForGroups_0.defaultNodeToolTip=
edgeAppearanceCalculator.ClueGOVisualStyleForGroups_0.defaultNodeWidth=70.0
edgeAppearanceCalculator.ClueGOVisualStyleForGroups_0.edgeLineWidthCalculator=KappaScore0
edgeAppearanceCalculator.ClueGOVisualStyleForGroups_0.edgeSourceArrowShapeCalculator=Regulates Source0
edgeAppearanceCalculator.ClueGOVisualStyleForGroups_0.edgeTargetArrowShapeCalculator=Regulates Target0
edgeAppearanceCalculator.Nested\ Network\ Style.defaultEdgeColor=51,51,51
edgeAppearanceCalculator.Nested\ Network\ Style.defaultEdgeFont=SanSerif,plain,10
edgeAppearanceCalculator.Nested\ Network\ Style.defaultEdgeFontSize=10.0
edgeAppearanceCalculator.Nested\ Network\ Style.defaultEdgeLabel=
edgeAppearanceCalculator.Nested\ Network\ Style.defaultEdgeLabelColor=0,0,0
edgeAppearanceCalculator.Nested\ Network\ Style.defaultEdgeLabelOpacity=255.0
edgeAppearanceCalculator.Nested\ Network\ Style.defaultEdgeLabelPosition=C,C,c,0,0
edgeAppearanceCalculator.Nested\ Network\ Style.defaultEdgeLabelWidth=100.0
edgeAppearanceCalculator.Nested\ Network\ Style.defaultEdgeLineStyle=SOLID
edgeAppearanceCalculator.Nested\ Network\ Style.defaultEdgeLineWidth=2.0
edgeAppearanceCalculator.Nested\ Network\ Style.defaultEdgeOpacity=255.0
edgeAppearanceCalculator.Nested\ Network\ Style.defaultEdgeSourceArrowColor=0,0,0
edgeAppearanceCalculator.Nested\ Network\ Style.defaultEdgeSourceArrowOpacity=255.0
edgeAppearanceCalculator.Nested\ Network\ Style.defaultEdgeSourceArrowShape=NONE
edgeAppearanceCalculator.Nested\ Network\ Style.defaultEdgeTargetArrowColor=0,0,0
edgeAppearanceCalculator.Nested\ Network\ Style.defaultEdgeTargetArrowOpacity=255.0
edgeAppearanceCalculator.Nested\ Network\ Style.defaultEdgeTargetArrowShape=NONE
edgeAppearanceCalculator.Nested\ Network\ Style.defaultEdgeToolTip=
edgeAppearanceCalculator.Nested\ Network\ Style.defaultNodeBorderColor=0,0,0
edgeAppearanceCalculator.Nested\ Network\ Style.defaultNodeBorderOpacity=255.0
edgeAppearanceCalculator.Nested\ Network\ Style.defaultNodeFillColor=255,255,255
edgeAppearanceCalculator.Nested\ Network\ Style.defaultNodeFont=Default,plain,12
edgeAppearanceCalculator.Nested\ Network\ Style.defaultNodeFontSize=12.0
edgeAppearanceCalculator.Nested\ Network\ Style.defaultNodeHight=30.0
edgeAppearanceCalculator.Nested\ Network\ Style.defaultNodeLabel=
edgeAppearanceCalculator.Nested\ Network\ Style.defaultNodeLabelColor=0,0,0
edgeAppearanceCalculator.Nested\ Network\ Style.defaultNodeLabelOpacity=255.0
edgeAppearanceCalculator.Nested\ Network\ Style.defaultNodeLabelPosition=C,C,c,0,0
edgeAppearanceCalculator.Nested\ Network\ Style.defaultNodeLabelWidth=100.0
edgeAppearanceCalculator.Nested\ Network\ Style.defaultNodeLineStyle=SOLID
edgeAppearanceCalculator.Nested\ Network\ Style.defaultNodeLineWidth=1.0
edgeAppearanceCalculator.Nested\ Network\ Style.defaultNodeOpacity=255.0
edgeAppearanceCalculator.Nested\ Network\ Style.defaultNodeShape=rect
edgeAppearanceCalculator.Nested\ Network\ Style.defaultNodeShowNestedNetwork=true
edgeAppearanceCalculator.Nested\ Network\ Style.defaultNodeSize=35.0
edgeAppearanceCalculator.Nested\ Network\ Style.defaultNodeToolTip=
edgeAppearanceCalculator.Nested\ Network\ Style.defaultNodeWidth=70.0
edgeAppearanceCalculator.Nested\ Network\ Style.nodeSizeLocked=true
edgeAppearanceCalculator.Sample1.defaultEdgeColor=0,0,0
edgeAppearanceCalculator.Sample1.defaultEdgeFont=Default,plain,10
edgeAppearanceCalculator.Sample1.defaultEdgeFontSize=10.0
edgeAppearanceCalculator.Sample1.defaultEdgeLabel=
edgeAppearanceCalculator.Sample1.defaultEdgeLabelColor=0,0,0
edgeAppearanceCalculator.Sample1.defaultEdgeLabelOpacity=255.0
edgeAppearanceCalculator.Sample1.defaultEdgeLabelPosition=C,C,c,0,0
edgeAppearanceCalculator.Sample1.defaultEdgeLabelWidth=100.0
edgeAppearanceCalculator.Sample1.defaultEdgeLineStyle=SOLID
edgeAppearanceCalculator.Sample1.defaultEdgeLineWidth=1.0
edgeAppearanceCalculator.Sample1.defaultEdgeOpacity=255.0
edgeAppearanceCalculator.Sample1.defaultEdgeSourceArrowColor=0,0,0
edgeAppearanceCalculator.Sample1.defaultEdgeSourceArrowOpacity=255.0
edgeAppearanceCalculator.Sample1.defaultEdgeSourceArrowShape=NONE
edgeAppearanceCalculator.Sample1.defaultEdgeTargetArrowColor=0,0,0
edgeAppearanceCalculator.Sample1.defaultEdgeTargetArrowOpacity=255.0
edgeAppearanceCalculator.Sample1.defaultEdgeTargetArrowShape=NONE
edgeAppearanceCalculator.Sample1.defaultEdgeToolTip=
edgeAppearanceCalculator.Sample1.defaultNodeBorderColor=0,0,0
edgeAppearanceCalculator.Sample1.defaultNodeBorderOpacity=255.0
edgeAppearanceCalculator.Sample1.defaultNodeFillColor=255,255,255
edgeAppearanceCalculator.Sample1.defaultNodeFont=Default,plain,12
edgeAppearanceCalculator.Sample1.defaultNodeFontSize=12.0
edgeAppearanceCalculator.Sample1.defaultNodeHight=30.0
edgeAppearanceCalculator.Sample1.defaultNodeLabel=
edgeAppearanceCalculator.Sample1.defaultNodeLabelColor=0,0,0
edgeAppearanceCalculator.Sample1.defaultNodeLabelOpacity=255.0
edgeAppearanceCalculator.Sample1.defaultNodeLabelPosition=C,C,c,0,0
edgeAppearanceCalculator.Sample1.defaultNodeLabelWidth=100.0
edgeAppearanceCalculator.Sample1.defaultNodeLineStyle=SOLID
edgeAppearanceCalculator.Sample1.defaultNodeLineWidth=1.0
edgeAppearanceCalculator.Sample1.defaultNodeOpacity=255.0
edgeAppearanceCalculator.Sample1.defaultNodeShape=rect
edgeAppearanceCalculator.Sample1.defaultNodeShowNestedNetwork=true
edgeAppearanceCalculator.Sample1.defaultNodeSize=35.0
edgeAppearanceCalculator.Sample1.defaultNodeToolTip=
edgeAppearanceCalculator.Sample1.defaultNodeWidth=70.0
edgeAppearanceCalculator.Sample1.edgeColorCalculator=BasicDiscrete
edgeAppearanceCalculator.Sample1.edgeLabelCalculator=EdgeLabel
edgeAppearanceCalculator.Sample1.edgeLineStyleCalculator=Sample1-Edge Line Style-Discrete Mapper
edgeAppearanceCalculator.Sample1.nodeSizeLocked=true
edgeAppearanceCalculator.Solid.defaultEdgeColor=204,204,204
edgeAppearanceCalculator.Solid.defaultEdgeFont=SanSerif,plain,10
edgeAppearanceCalculator.Solid.defaultEdgeFontSize=10.0
edgeAppearanceCalculator.Solid.defaultEdgeLabel=
edgeAppearanceCalculator.Solid.defaultEdgeLabelColor=102,102,102
edgeAppearanceCalculator.Solid.defaultEdgeLabelOpacity=190.0
edgeAppearanceCalculator.Solid.defaultEdgeLabelPosition=C,C,c,0,0
edgeAppearanceCalculator.Solid.defaultEdgeLabelWidth=100.0
edgeAppearanceCalculator.Solid.defaultEdgeLineStyle=SOLID
edgeAppearanceCalculator.Solid.defaultEdgeLineWidth=12.0
edgeAppearanceCalculator.Solid.defaultEdgeOpacity=255.0
edgeAppearanceCalculator.Solid.defaultEdgeSourceArrowColor=0,0,0
edgeAppearanceCalculator.Solid.defaultEdgeSourceArrowOpacity=255.0
edgeAppearanceCalculator.Solid.defaultEdgeSourceArrowShape=NONE
edgeAppearanceCalculator.Solid.defaultEdgeTargetArrowColor=0,0,0
edgeAppearanceCalculator.Solid.defaultEdgeTargetArrowOpacity=255.0
edgeAppearanceCalculator.Solid.defaultEdgeTargetArrowShape=NONE
edgeAppearanceCalculator.Solid.defaultEdgeToolTip=
edgeAppearanceCalculator.Solid.defaultNodeBorderColor=0,0,0
edgeAppearanceCalculator.Solid.defaultNodeBorderOpacity=255.0
edgeAppearanceCalculator.Solid.defaultNodeFillColor=255,255,255
edgeAppearanceCalculator.Solid.defaultNodeFont=Default,plain,12
edgeAppearanceCalculator.Solid.defaultNodeFontSize=12.0
edgeAppearanceCalculator.Solid.defaultNodeHight=30.0
edgeAppearanceCalculator.Solid.defaultNodeLabel=
edgeAppearanceCalculator.Solid.defaultNodeLabelColor=0,0,0
edgeAppearanceCalculator.Solid.defaultNodeLabelOpacity=255.0
edgeAppearanceCalculator.Solid.defaultNodeLabelPosition=C,C,c,0,0
edgeAppearanceCalculator.Solid.defaultNodeLabelWidth=100.0
edgeAppearanceCalculator.Solid.defaultNodeLineStyle=SOLID
edgeAppearanceCalculator.Solid.defaultNodeLineWidth=1.0
edgeAppearanceCalculator.Solid.defaultNodeOpacity=255.0
edgeAppearanceCalculator.Solid.defaultNodeShape=rect
edgeAppearanceCalculator.Solid.defaultNodeShowNestedNetwork=true
edgeAppearanceCalculator.Solid.defaultNodeSize=35.0
edgeAppearanceCalculator.Solid.defaultNodeToolTip=
edgeAppearanceCalculator.Solid.defaultNodeWidth=70.0
edgeAppearanceCalculator.Solid.edgeLabelCalculator=Solid-Edge Label-Passthrough Mapper
edgeAppearanceCalculator.Solid.nodeSizeLocked=true
edgeAppearanceCalculator.Universe.defaultEdgeColor=255,255,255
edgeAppearanceCalculator.Universe.defaultEdgeFont=SanSerif,plain,10
edgeAppearanceCalculator.Universe.defaultEdgeFontSize=10.0
edgeAppearanceCalculator.Universe.defaultEdgeLabel=
edgeAppearanceCalculator.Universe.defaultEdgeLabelColor=0,0,0
edgeAppearanceCalculator.Universe.defaultEdgeLabelOpacity=255.0
edgeAppearanceCalculator.Universe.defaultEdgeLabelPosition=C,C,c,0,0
edgeAppearanceCalculator.Universe.defaultEdgeLabelWidth=100.0
edgeAppearanceCalculator.Universe.defaultEdgeLineStyle=LONG_DASH
edgeAppearanceCalculator.Universe.defaultEdgeLineWidth=3.0
edgeAppearanceCalculator.Universe.defaultEdgeOpacity=100.0
edgeAppearanceCalculator.Universe.defaultEdgeSourceArrowColor=0,0,0
edgeAppearanceCalculator.Universe.defaultEdgeSourceArrowOpacity=255.0
edgeAppearanceCalculator.Universe.defaultEdgeSourceArrowShape=NONE
edgeAppearanceCalculator.Universe.defaultEdgeTargetArrowColor=0,0,0
edgeAppearanceCalculator.Universe.defaultEdgeTargetArrowOpacity=255.0
edgeAppearanceCalculator.Universe.defaultEdgeTargetArrowShape=NONE
edgeAppearanceCalculator.Universe.defaultEdgeToolTip=
edgeAppearanceCalculator.Universe.defaultNodeBorderColor=0,0,0
edgeAppearanceCalculator.Universe.defaultNodeBorderOpacity=255.0
edgeAppearanceCalculator.Universe.defaultNodeFillColor=255,255,255
edgeAppearanceCalculator.Universe.defaultNodeFont=Default,plain,12
edgeAppearanceCalculator.Universe.defaultNodeFontSize=12.0
edgeAppearanceCalculator.Universe.defaultNodeHight=30.0
edgeAppearanceCalculator.Universe.defaultNodeLabel=
edgeAppearanceCalculator.Universe.defaultNodeLabelColor=0,0,0
edgeAppearanceCalculator.Universe.defaultNodeLabelOpacity=255.0
edgeAppearanceCalculator.Universe.defaultNodeLabelPosition=C,C,c,0,0
edgeAppearanceCalculator.Universe.defaultNodeLabelWidth=100.0
edgeAppearanceCalculator.Universe.defaultNodeLineStyle=SOLID
edgeAppearanceCalculator.Universe.defaultNodeLineWidth=1.0
edgeAppearanceCalculator.Universe.defaultNodeOpacity=255.0
edgeAppearanceCalculator.Universe.defaultNodeShape=rect
edgeAppearanceCalculator.Universe.defaultNodeShowNestedNetwork=true
edgeAppearanceCalculator.Universe.defaultNodeSize=35.0
edgeAppearanceCalculator.Universe.defaultNodeToolTip=
edgeAppearanceCalculator.Universe.defaultNodeWidth=70.0
edgeAppearanceCalculator.Universe.nodeSizeLocked=true
edgeAppearanceCalculator.default.defaultEdgeColor=0,0,255
edgeAppearanceCalculator.default.defaultEdgeFont=Default,plain,10
edgeAppearanceCalculator.default.defaultEdgeFontSize=10.0
edgeAppearanceCalculator.default.defaultEdgeLabel=
edgeAppearanceCalculator.default.defaultEdgeLabelColor=0,0,0
edgeAppearanceCalculator.default.defaultEdgeLabelOpacity=255.0
edgeAppearanceCalculator.default.defaultEdgeLabelPosition=C,C,c,0,0
edgeAppearanceCalculator.default.defaultEdgeLabelWidth=100.0
edgeAppearanceCalculator.default.defaultEdgeLineStyle=SOLID
edgeAppearanceCalculator.default.defaultEdgeLineWidth=1.5
edgeAppearanceCalculator.default.defaultEdgeOpacity=255.0
edgeAppearanceCalculator.default.defaultEdgeSourceArrowColor=0,0,0
edgeAppearanceCalculator.default.defaultEdgeSourceArrowOpacity=255.0
edgeAppearanceCalculator.default.defaultEdgeSourceArrowShape=NONE
edgeAppearanceCalculator.default.defaultEdgeTargetArrowColor=0,0,0
edgeAppearanceCalculator.default.defaultEdgeTargetArrowOpacity=255.0
edgeAppearanceCalculator.default.defaultEdgeTargetArrowShape=NONE
edgeAppearanceCalculator.default.defaultEdgeToolTip=
edgeAppearanceCalculator.default.defaultNodeBorderColor=0,0,0
edgeAppearanceCalculator.default.defaultNodeBorderOpacity=255.0
edgeAppearanceCalculator.default.defaultNodeFillColor=255,255,255
edgeAppearanceCalculator.default.defaultNodeFont=Default,plain,12
edgeAppearanceCalculator.default.defaultNodeFontSize=12.0
edgeAppearanceCalculator.default.defaultNodeHight=30.0
edgeAppearanceCalculator.default.defaultNodeLabel=
edgeAppearanceCalculator.default.defaultNodeLabelColor=0,0,0
edgeAppearanceCalculator.default.defaultNodeLabelOpacity=255.0
edgeAppearanceCalculator.default.defaultNodeLabelPosition=C,C,c,0,0
edgeAppearanceCalculator.default.defaultNodeLabelWidth=100.0
edgeAppearanceCalculator.default.defaultNodeLineStyle=SOLID
edgeAppearanceCalculator.default.defaultNodeLineWidth=1.0
edgeAppearanceCalculator.default.defaultNodeOpacity=255.0
edgeAppearanceCalculator.default.defaultNodeShape=rect
edgeAppearanceCalculator.default.defaultNodeShowNestedNetwork=true
edgeAppearanceCalculator.default.defaultNodeSize=35.0
edgeAppearanceCalculator.default.defaultNodeToolTip=
edgeAppearanceCalculator.default.defaultNodeWidth=70.0
edgeAppearanceCalculator.default.nodeSizeLocked=true
edgeColorCalculator.BasicDiscrete.mapping.controller=interaction
edgeColorCalculator.BasicDiscrete.mapping.controllerType=4
edgeColorCalculator.BasicDiscrete.mapping.map.pd=255,0,51
edgeColorCalculator.BasicDiscrete.mapping.map.pp=0,204,0
edgeColorCalculator.BasicDiscrete.mapping.type=DiscreteMapping
edgeColorCalculator.BasicDiscrete.visualPropertyType=EDGE_COLOR
edgeLabelCalculator.EdgeLabel.mapping.controller=interaction
edgeLabelCalculator.EdgeLabel.mapping.type=PassThroughMapping
edgeLabelCalculator.EdgeLabel.visualPropertyType=EDGE_LABEL
edgeLabelCalculator.Solid-Edge\ Label-Passthrough\ Mapper.mapping.controller=interaction
edgeLabelCalculator.Solid-Edge\ Label-Passthrough\ Mapper.mapping.type=PassThroughMapping
edgeLabelCalculator.Solid-Edge\ Label-Passthrough\ Mapper.visualPropertyType=EDGE_LABEL
edgeLineStyleCalculator.Sample1-Edge\ Line\ Style-Discrete\ Mapper.mapping.controller=interaction
edgeLineStyleCalculator.Sample1-Edge\ Line\ Style-Discrete\ Mapper.mapping.controllerType=4
edgeLineStyleCalculator.Sample1-Edge\ Line\ Style-Discrete\ Mapper.mapping.map.pd=LONG_DASH
edgeLineStyleCalculator.Sample1-Edge\ Line\ Style-Discrete\ Mapper.mapping.map.pp=SOLID
edgeLineStyleCalculator.Sample1-Edge\ Line\ Style-Discrete\ Mapper.mapping.type=DiscreteMapping
edgeLineStyleCalculator.Sample1-Edge\ Line\ Style-Discrete\ Mapper.visualPropertyType=EDGE_LINE_STYLE
edgeLineWidthCalculator.KappaScore0.mapping.boundaryvalues=2
edgeLineWidthCalculator.KappaScore0.mapping.bv0.domainvalue=0.0
edgeLineWidthCalculator.KappaScore0.mapping.bv0.equal=0.5
edgeLineWidthCalculator.KappaScore0.mapping.bv0.greater=0.5
edgeLineWidthCalculator.KappaScore0.mapping.bv0.lesser=0.5
edgeLineWidthCalculator.KappaScore0.mapping.bv1.domainvalue=1.0
edgeLineWidthCalculator.KappaScore0.mapping.bv1.equal=3
edgeLineWidthCalculator.KappaScore0.mapping.bv1.greater=3
edgeLineWidthCalculator.KappaScore0.mapping.bv1.lesser=0.5
edgeLineWidthCalculator.KappaScore0.mapping.controller=KappaScore0
edgeLineWidthCalculator.KappaScore0.mapping.interpolator=LinearNumberToNumberInterpolator
edgeLineWidthCalculator.KappaScore0.mapping.type=ContinuousMapping
edgeLineWidthCalculator.KappaScore0.visualPropertyType=EDGE_LINE_WIDTH
edgeSourceArrowShapeCalculator.Regulates\ Source0.mapping.controller=Regulates Source0
edgeSourceArrowShapeCalculator.Regulates\ Source0.mapping.controllerType=-1
edgeSourceArrowShapeCalculator.Regulates\ Source0.mapping.map.NEGATIVELY_REGULATES=T
edgeSourceArrowShapeCalculator.Regulates\ Source0.mapping.map.POSITIVELY_REGULATES=ARROW
edgeSourceArrowShapeCalculator.Regulates\ Source0.mapping.map.REGULATES=DIAMOND
edgeSourceArrowShapeCalculator.Regulates\ Source0.mapping.type=DiscreteMapping
edgeSourceArrowShapeCalculator.Regulates\ Source0.visualPropertyType=EDGE_SRCARROW_SHAPE
edgeTargetArrowShapeCalculator.Regulates\ Target0.mapping.controller=Regulates Target0
edgeTargetArrowShapeCalculator.Regulates\ Target0.mapping.controllerType=-1
edgeTargetArrowShapeCalculator.Regulates\ Target0.mapping.map.NEGATIVELY_REGULATES=T
edgeTargetArrowShapeCalculator.Regulates\ Target0.mapping.map.POSITIVELY_REGULATES=ARROW
edgeTargetArrowShapeCalculator.Regulates\ Target0.mapping.map.REGULATES=DIAMOND
edgeTargetArrowShapeCalculator.Regulates\ Target0.mapping.type=DiscreteMapping
edgeTargetArrowShapeCalculator.Regulates\ Target0.visualPropertyType=EDGE_TGTARROW_SHAPE
globalAppearanceCalculator.ClueGOVisualStyleForGroups_0.defaultBackgroundColor=255,255,255
globalAppearanceCalculator.ClueGOVisualStyleForGroups_0.defaultEdgeReverseSelectionColor=0,255,0
globalAppearanceCalculator.ClueGOVisualStyleForGroups_0.defaultEdgeSelectionColor=255,0,0
globalAppearanceCalculator.ClueGOVisualStyleForGroups_0.defaultNodeReverseSelectionColor=0,255,0
globalAppearanceCalculator.ClueGOVisualStyleForGroups_0.defaultNodeSelectionColor=255,255,0
globalAppearanceCalculator.Nested\ Network\ Style.defaultBackgroundColor=255,255,255
globalAppearanceCalculator.Nested\ Network\ Style.defaultEdgeReverseSelectionColor=0,255,0
globalAppearanceCalculator.Nested\ Network\ Style.defaultEdgeSelectionColor=255,0,0
globalAppearanceCalculator.Nested\ Network\ Style.defaultNodeReverseSelectionColor=0,255,0
globalAppearanceCalculator.Nested\ Network\ Style.defaultNodeSelectionColor=255,255,0
globalAppearanceCalculator.Sample1.defaultBackgroundColor=255,255,255
globalAppearanceCalculator.Sample1.defaultEdgeReverseSelectionColor=0,255,0
globalAppearanceCalculator.Sample1.defaultEdgeSelectionColor=255,0,0
globalAppearanceCalculator.Sample1.defaultNodeReverseSelectionColor=0,255,0
globalAppearanceCalculator.Sample1.defaultNodeSelectionColor=255,255,0
globalAppearanceCalculator.Solid.defaultBackgroundColor=255,255,255
globalAppearanceCalculator.Solid.defaultEdgeReverseSelectionColor=0,255,0
globalAppearanceCalculator.Solid.defaultEdgeSelectionColor=255,0,0
globalAppearanceCalculator.Solid.defaultNodeReverseSelectionColor=0,255,0
globalAppearanceCalculator.Solid.defaultNodeSelectionColor=255,255,0
globalAppearanceCalculator.Universe.defaultBackgroundColor=0,0,0
globalAppearanceCalculator.Universe.defaultEdgeReverseSelectionColor=0,255,0
globalAppearanceCalculator.Universe.defaultEdgeSelectionColor=255,0,0
globalAppearanceCalculator.Universe.defaultNodeReverseSelectionColor=0,255,0
globalAppearanceCalculator.Universe.defaultNodeSelectionColor=255,255,0
globalAppearanceCalculator.default.defaultBackgroundColor=204,204,255
globalAppearanceCalculator.default.defaultEdgeReverseSelectionColor=0,255,0
globalAppearanceCalculator.default.defaultEdgeSelectionColor=255,0,0
globalAppearanceCalculator.default.defaultNodeReverseSelectionColor=0,255,0
globalAppearanceCalculator.default.defaultNodeSelectionColor=255,255,0
nodeAppearanceCalculator.ClueGOVisualStyleForGroups_0.defaultEdgeColor=0,0,0
nodeAppearanceCalculator.ClueGOVisualStyleForGroups_0.defaultEdgeFont=SanSerif,plain,10
nodeAppearanceCalculator.ClueGOVisualStyleForGroups_0.defaultEdgeFontSize=10.0
nodeAppearanceCalculator.ClueGOVisualStyleForGroups_0.defaultEdgeLabel=
nodeAppearanceCalculator.ClueGOVisualStyleForGroups_0.defaultEdgeLabelColor=0,0,0
nodeAppearanceCalculator.ClueGOVisualStyleForGroups_0.defaultEdgeLabelOpacity=255
nodeAppearanceCalculator.ClueGOVisualStyleForGroups_0.defaultEdgeLabelPosition=C,C,c,0,0
nodeAppearanceCalculator.ClueGOVisualStyleForGroups_0.defaultEdgeLabelWidth=100.0
nodeAppearanceCalculator.ClueGOVisualStyleForGroups_0.defaultEdgeLineStyle=SOLID
nodeAppearanceCalculator.ClueGOVisualStyleForGroups_0.defaultEdgeLineWidth=1.0
nodeAppearanceCalculator.ClueGOVisualStyleForGroups_0.defaultEdgeOpacity=255
nodeAppearanceCalculator.ClueGOVisualStyleForGroups_0.defaultEdgeSourceArrowColor=0,0,0
nodeAppearanceCalculator.ClueGOVisualStyleForGroups_0.defaultEdgeSourceArrowOpacity=255
nodeAppearanceCalculator.ClueGOVisualStyleForGroups_0.defaultEdgeSourceArrowShape=NONE
nodeAppearanceCalculator.ClueGOVisualStyleForGroups_0.defaultEdgeTargetArrowColor=0,0,0
nodeAppearanceCalculator.ClueGOVisualStyleForGroups_0.defaultEdgeTargetArrowOpacity=255
nodeAppearanceCalculator.ClueGOVisualStyleForGroups_0.defaultEdgeTargetArrowShape=NONE
nodeAppearanceCalculator.ClueGOVisualStyleForGroups_0.defaultEdgeToolTip=
nodeAppearanceCalculator.ClueGOVisualStyleForGroups_0.defaultNodeBorderColor=0,0,0
nodeAppearanceCalculator.ClueGOVisualStyleForGroups_0.defaultNodeBorderOpacity=255
nodeAppearanceCalculator.ClueGOVisualStyleForGroups_0.defaultNodeFillColor=255,255,255
nodeAppearanceCalculator.ClueGOVisualStyleForGroups_0.defaultNodeFont=Default,plain,12
nodeAppearanceCalculator.ClueGOVisualStyleForGroups_0.defaultNodeFontSize=12.0
nodeAppearanceCalculator.ClueGOVisualStyleForGroups_0.defaultNodeHight=30.0
nodeAppearanceCalculator.ClueGOVisualStyleForGroups_0.defaultNodeLabel=
nodeAppearanceCalculator.ClueGOVisualStyleForGroups_0.defaultNodeLabelColor=0,0,0
nodeAppearanceCalculator.ClueGOVisualStyleForGroups_0.defaultNodeLabelOpacity=255
nodeAppearanceCalculator.ClueGOVisualStyleForGroups_0.defaultNodeLabelPosition=C,C,c,0,0
nodeAppearanceCalculator.ClueGOVisualStyleForGroups_0.defaultNodeLabelWidth=100.0
nodeAppearanceCalculator.ClueGOVisualStyleForGroups_0.defaultNodeLineStyle=SOLID
nodeAppearanceCalculator.ClueGOVisualStyleForGroups_0.defaultNodeLineWidth=1.0
nodeAppearanceCalculator.ClueGOVisualStyleForGroups_0.defaultNodeOpacity=255
nodeAppearanceCalculator.ClueGOVisualStyleForGroups_0.defaultNodeShape=ellipse
nodeAppearanceCalculator.ClueGOVisualStyleForGroups_0.defaultNodeShowNestedNetwork=true
nodeAppearanceCalculator.ClueGOVisualStyleForGroups_0.defaultNodeSize=35.0
nodeAppearanceCalculator.ClueGOVisualStyleForGroups_0.defaultNodeToolTip=
nodeAppearanceCalculator.ClueGOVisualStyleForGroups_0.defaultNodeWidth=70.0
nodeAppearanceCalculator.ClueGOVisualStyleForGroups_0.nodeFillColorCalculator=GOGroups0
nodeAppearanceCalculator.ClueGOVisualStyleForGroups_0.nodeFontFaceCalculator=OverViewTerm0
nodeAppearanceCalculator.ClueGOVisualStyleForGroups_0.nodeFontSizeCalculator=OverViewTerm0
nodeAppearanceCalculator.ClueGOVisualStyleForGroups_0.nodeLabelCalculator=GOTerm0
nodeAppearanceCalculator.ClueGOVisualStyleForGroups_0.nodeLabelColor=GOID0
nodeAppearanceCalculator.ClueGOVisualStyleForGroups_0.nodeLabelPositionCalculator=OverViewTerm0
nodeAppearanceCalculator.ClueGOVisualStyleForGroups_0.nodeUniformSizeCalculator=Term PValue Corrected with Bonferroni0
nodeAppearanceCalculator.Nested\ Network\ Style.defaultEdgeColor=0,0,0
nodeAppearanceCalculator.Nested\ Network\ Style.defaultEdgeFont=SanSerif,plain,10
nodeAppearanceCalculator.Nested\ Network\ Style.defaultEdgeFontSize=10.0
nodeAppearanceCalculator.Nested\ Network\ Style.defaultEdgeLabel=
nodeAppearanceCalculator.Nested\ Network\ Style.defaultEdgeLabelColor=0,0,0
nodeAppearanceCalculator.Nested\ Network\ Style.defaultEdgeLabelOpacity=255.0
nodeAppearanceCalculator.Nested\ Network\ Style.defaultEdgeLabelPosition=C,C,c,0,0
nodeAppearanceCalculator.Nested\ Network\ Style.defaultEdgeLabelWidth=100.0
nodeAppearanceCalculator.Nested\ Network\ Style.defaultEdgeLineStyle=SOLID
nodeAppearanceCalculator.Nested\ Network\ Style.defaultEdgeLineWidth=1.0
nodeAppearanceCalculator.Nested\ Network\ Style.defaultEdgeOpacity=255.0
nodeAppearanceCalculator.Nested\ Network\ Style.defaultEdgeSourceArrowColor=0,0,0
nodeAppearanceCalculator.Nested\ Network\ Style.defaultEdgeSourceArrowOpacity=255.0
nodeAppearanceCalculator.Nested\ Network\ Style.defaultEdgeSourceArrowShape=NONE
nodeAppearanceCalculator.Nested\ Network\ Style.defaultEdgeTargetArrowColor=0,0,0
nodeAppearanceCalculator.Nested\ Network\ Style.defaultEdgeTargetArrowOpacity=255.0
nodeAppearanceCalculator.Nested\ Network\ Style.defaultEdgeTargetArrowShape=NONE
nodeAppearanceCalculator.Nested\ Network\ Style.defaultEdgeToolTip=
nodeAppearanceCalculator.Nested\ Network\ Style.defaultNodeBorderColor=0,153,0
nodeAppearanceCalculator.Nested\ Network\ Style.defaultNodeBorderOpacity=190.0
nodeAppearanceCalculator.Nested\ Network\ Style.defaultNodeFillColor=153,255,153
nodeAppearanceCalculator.Nested\ Network\ Style.defaultNodeFont=SansSerif,plain,12
nodeAppearanceCalculator.Nested\ Network\ Style.defaultNodeFontSize=13.0
nodeAppearanceCalculator.Nested\ Network\ Style.defaultNodeHight=30.0
nodeAppearanceCalculator.Nested\ Network\ Style.defaultNodeLabel=
nodeAppearanceCalculator.Nested\ Network\ Style.defaultNodeLabelColor=0,0,0
nodeAppearanceCalculator.Nested\ Network\ Style.defaultNodeLabelOpacity=255.0
nodeAppearanceCalculator.Nested\ Network\ Style.defaultNodeLabelPosition=C,C,c,0,0
nodeAppearanceCalculator.Nested\ Network\ Style.defaultNodeLabelWidth=100.0
nodeAppearanceCalculator.Nested\ Network\ Style.defaultNodeLineStyle=SOLID
nodeAppearanceCalculator.Nested\ Network\ Style.defaultNodeLineWidth=2.0
nodeAppearanceCalculator.Nested\ Network\ Style.defaultNodeOpacity=150.0
nodeAppearanceCalculator.Nested\ Network\ Style.defaultNodeShape=ellipse
nodeAppearanceCalculator.Nested\ Network\ Style.defaultNodeShowNestedNetwork=true
nodeAppearanceCalculator.Nested\ Network\ Style.defaultNodeSize=40.0
nodeAppearanceCalculator.Nested\ Network\ Style.defaultNodeToolTip=
nodeAppearanceCalculator.Nested\ Network\ Style.defaultNodeWidth=70.0
nodeAppearanceCalculator.Nested\ Network\ Style.nodeBorderColorCalculator=Nested Network Style-Node Border Color-Discrete Mapper
nodeAppearanceCalculator.Nested\ Network\ Style.nodeFillColorCalculator=Nested Network Style-Node Color-Discrete Mapper
nodeAppearanceCalculator.Nested\ Network\ Style.nodeLabelCalculator=Nested Network Style-Node Label-Passthrough Mapper
nodeAppearanceCalculator.Nested\ Network\ Style.nodeLabelColor=Nested Network Style-Node Label Color-Discrete Mapper
nodeAppearanceCalculator.Nested\ Network\ Style.nodeLabelPositionCalculator=Nested Network Style-Node Label Position-Discrete Mapper
nodeAppearanceCalculator.Nested\ Network\ Style.nodeLineWidthCalculator=Nested Network Style-Node Line Width-Discrete Mapper
nodeAppearanceCalculator.Nested\ Network\ Style.nodeShapeCalculator=Nested Network Style-Node Shape-Discrete Mapper
nodeAppearanceCalculator.Nested\ Network\ Style.nodeSizeLocked=true
nodeAppearanceCalculator.Nested\ Network\ Style.nodeUniformSizeCalculator=Nested Network Style-Node Size-Discrete Mapper
nodeAppearanceCalculator.Sample1.defaultEdgeColor=0,0,0
nodeAppearanceCalculator.Sample1.defaultEdgeFont=SanSerif,plain,10
nodeAppearanceCalculator.Sample1.defaultEdgeFontSize=10.0
nodeAppearanceCalculator.Sample1.defaultEdgeLabel=
nodeAppearanceCalculator.Sample1.defaultEdgeLabelColor=0,0,0
nodeAppearanceCalculator.Sample1.defaultEdgeLabelOpacity=255.0
nodeAppearanceCalculator.Sample1.defaultEdgeLabelPosition=C,C,c,0,0
nodeAppearanceCalculator.Sample1.defaultEdgeLabelWidth=100.0
nodeAppearanceCalculator.Sample1.defaultEdgeLineStyle=SOLID
nodeAppearanceCalculator.Sample1.defaultEdgeLineWidth=1.0
nodeAppearanceCalculator.Sample1.defaultEdgeOpacity=255.0
nodeAppearanceCalculator.Sample1.defaultEdgeSourceArrowColor=0,0,0
nodeAppearanceCalculator.Sample1.defaultEdgeSourceArrowOpacity=255.0
nodeAppearanceCalculator.Sample1.defaultEdgeSourceArrowShape=NONE
nodeAppearanceCalculator.Sample1.defaultEdgeTargetArrowColor=0,0,0
nodeAppearanceCalculator.Sample1.defaultEdgeTargetArrowOpacity=255.0
nodeAppearanceCalculator.Sample1.defaultEdgeTargetArrowShape=NONE
nodeAppearanceCalculator.Sample1.defaultEdgeToolTip=
nodeAppearanceCalculator.Sample1.defaultNodeBorderColor=0,0,0
nodeAppearanceCalculator.Sample1.defaultNodeBorderOpacity=255.0
nodeAppearanceCalculator.Sample1.defaultNodeFillColor=204,204,255
nodeAppearanceCalculator.Sample1.defaultNodeFont=Dialog.bold,plain,12
nodeAppearanceCalculator.Sample1.defaultNodeFontSize=12.0
nodeAppearanceCalculator.Sample1.defaultNodeHight=30.0
nodeAppearanceCalculator.Sample1.defaultNodeLabel=
nodeAppearanceCalculator.Sample1.defaultNodeLabelColor=0,0,0
nodeAppearanceCalculator.Sample1.defaultNodeLabelOpacity=255.0
nodeAppearanceCalculator.Sample1.defaultNodeLabelPosition=C,C,c,0,0
nodeAppearanceCalculator.Sample1.defaultNodeLabelWidth=100.0
nodeAppearanceCalculator.Sample1.defaultNodeLineStyle=SOLID
nodeAppearanceCalculator.Sample1.defaultNodeLineWidth=0.0
nodeAppearanceCalculator.Sample1.defaultNodeOpacity=255.0
nodeAppearanceCalculator.Sample1.defaultNodeShape=ellipse
nodeAppearanceCalculator.Sample1.defaultNodeShowNestedNetwork=true
nodeAppearanceCalculator.Sample1.defaultNodeSize=40.0
nodeAppearanceCalculator.Sample1.defaultNodeToolTip=
nodeAppearanceCalculator.Sample1.defaultNodeWidth=70.0
nodeAppearanceCalculator.Sample1.nodeLabelCalculator=NodeLabel
nodeAppearanceCalculator.Sample1.nodeSizeLocked=true
nodeAppearanceCalculator.Solid.defaultEdgeColor=0,0,0
nodeAppearanceCalculator.Solid.defaultEdgeFont=SanSerif,plain,10
nodeAppearanceCalculator.Solid.defaultEdgeFontSize=10.0
nodeAppearanceCalculator.Solid.defaultEdgeLabel=
nodeAppearanceCalculator.Solid.defaultEdgeLabelColor=0,0,0
nodeAppearanceCalculator.Solid.defaultEdgeLabelOpacity=255.0
nodeAppearanceCalculator.Solid.defaultEdgeLabelPosition=C,C,c,0,0
nodeAppearanceCalculator.Solid.defaultEdgeLabelWidth=100.0
nodeAppearanceCalculator.Solid.defaultEdgeLineStyle=SOLID
nodeAppearanceCalculator.Solid.defaultEdgeLineWidth=1.0
nodeAppearanceCalculator.Solid.defaultEdgeOpacity=255.0
nodeAppearanceCalculator.Solid.defaultEdgeSourceArrowColor=0,0,0
nodeAppearanceCalculator.Solid.defaultEdgeSourceArrowOpacity=255.0
nodeAppearanceCalculator.Solid.defaultEdgeSourceArrowShape=NONE
nodeAppearanceCalculator.Solid.defaultEdgeTargetArrowColor=0,0,0
nodeAppearanceCalculator.Solid.defaultEdgeTargetArrowOpacity=255.0
nodeAppearanceCalculator.Solid.defaultEdgeTargetArrowShape=NONE
nodeAppearanceCalculator.Solid.defaultEdgeToolTip=
nodeAppearanceCalculator.Solid.defaultNodeBorderColor=0,0,0
nodeAppearanceCalculator.Solid.defaultNodeBorderOpacity=255.0
nodeAppearanceCalculator.Solid.defaultNodeFillColor=102,102,102
nodeAppearanceCalculator.Solid.defaultNodeFont=Courier 10 Pitch Bold,plain,12
nodeAppearanceCalculator.Solid.defaultNodeFontSize=18.0
nodeAppearanceCalculator.Solid.defaultNodeHight=30.0
nodeAppearanceCalculator.Solid.defaultNodeLabel=
nodeAppearanceCalculator.Solid.defaultNodeLabelColor=0,0,0
nodeAppearanceCalculator.Solid.defaultNodeLabelOpacity=160.0
nodeAppearanceCalculator.Solid.defaultNodeLabelPosition=S,NW,c,0,5
nodeAppearanceCalculator.Solid.defaultNodeLabelWidth=100.0
nodeAppearanceCalculator.Solid.defaultNodeLineStyle=SOLID
nodeAppearanceCalculator.Solid.defaultNodeLineWidth=0.0
nodeAppearanceCalculator.Solid.defaultNodeOpacity=255.0
nodeAppearanceCalculator.Solid.defaultNodeShape=ellipse
nodeAppearanceCalculator.Solid.defaultNodeShowNestedNetwork=true
nodeAppearanceCalculator.Solid.defaultNodeSize=40.0
nodeAppearanceCalculator.Solid.defaultNodeToolTip=
nodeAppearanceCalculator.Solid.defaultNodeWidth=70.0
nodeAppearanceCalculator.Solid.nodeLabelCalculator=Solid-Node Label-Passthrough Mapper
nodeAppearanceCalculator.Solid.nodeSizeLocked=true
nodeAppearanceCalculator.Universe.defaultEdgeColor=0,0,0
nodeAppearanceCalculator.Universe.defaultEdgeFont=SanSerif,plain,10
nodeAppearanceCalculator.Universe.defaultEdgeFontSize=10.0
nodeAppearanceCalculator.Universe.defaultEdgeLabel=
nodeAppearanceCalculator.Universe.defaultEdgeLabelColor=0,0,0
nodeAppearanceCalculator.Universe.defaultEdgeLabelOpacity=255.0
nodeAppearanceCalculator.Universe.defaultEdgeLabelPosition=C,C,c,0,0
nodeAppearanceCalculator.Universe.defaultEdgeLabelWidth=100.0
nodeAppearanceCalculator.Universe.defaultEdgeLineStyle=SOLID
nodeAppearanceCalculator.Universe.defaultEdgeLineWidth=1.0
nodeAppearanceCalculator.Universe.defaultEdgeOpacity=255.0
nodeAppearanceCalculator.Universe.defaultEdgeSourceArrowColor=0,0,0
nodeAppearanceCalculator.Universe.defaultEdgeSourceArrowOpacity=255.0
nodeAppearanceCalculator.Universe.defaultEdgeSourceArrowShape=NONE
nodeAppearanceCalculator.Universe.defaultEdgeTargetArrowColor=0,0,0
nodeAppearanceCalculator.Universe.defaultEdgeTargetArrowOpacity=255.0
nodeAppearanceCalculator.Universe.defaultEdgeTargetArrowShape=NONE
nodeAppearanceCalculator.Universe.defaultEdgeToolTip=
nodeAppearanceCalculator.Universe.defaultNodeBorderColor=0,0,0
nodeAppearanceCalculator.Universe.defaultNodeBorderOpacity=255.0
nodeAppearanceCalculator.Universe.defaultNodeFillColor=0,0,0
nodeAppearanceCalculator.Universe.defaultNodeFont=Monospaced.bold,plain,12
nodeAppearanceCalculator.Universe.defaultNodeFontSize=20.0
nodeAppearanceCalculator.Universe.defaultNodeHight=30.0
nodeAppearanceCalculator.Universe.defaultNodeLabel=
nodeAppearanceCalculator.Universe.defaultNodeLabelColor=255,255,204
nodeAppearanceCalculator.Universe.defaultNodeLabelOpacity=180.0
nodeAppearanceCalculator.Universe.defaultNodeLabelPosition=C,C,c,0,0
nodeAppearanceCalculator.Universe.defaultNodeLabelWidth=100.0
nodeAppearanceCalculator.Universe.defaultNodeLineStyle=SOLID
nodeAppearanceCalculator.Universe.defaultNodeLineWidth=0.0
nodeAppearanceCalculator.Universe.defaultNodeOpacity=0.0
nodeAppearanceCalculator.Universe.defaultNodeShape=ellipse
nodeAppearanceCalculator.Universe.defaultNodeShowNestedNetwork=true
nodeAppearanceCalculator.Universe.defaultNodeSize=40.0
nodeAppearanceCalculator.Universe.defaultNodeToolTip=
nodeAppearanceCalculator.Universe.defaultNodeWidth=100.0
nodeAppearanceCalculator.Universe.nodeLabelCalculator=Universe-Node Label-Passthrough Mapper
nodeAppearanceCalculator.Universe.nodeSizeLocked=true
nodeAppearanceCalculator.default.defaultEdgeColor=0,0,0
nodeAppearanceCalculator.default.defaultEdgeFont=SanSerif,plain,10
nodeAppearanceCalculator.default.defaultEdgeFontSize=10.0
nodeAppearanceCalculator.default.defaultEdgeLabel=
nodeAppearanceCalculator.default.defaultEdgeLabelColor=0,0,0
nodeAppearanceCalculator.default.defaultEdgeLabelOpacity=255.0
nodeAppearanceCalculator.default.defaultEdgeLabelPosition=C,C,c,0,0
nodeAppearanceCalculator.default.defaultEdgeLabelWidth=100.0
nodeAppearanceCalculator.default.defaultEdgeLineStyle=SOLID
nodeAppearanceCalculator.default.defaultEdgeLineWidth=1.0
nodeAppearanceCalculator.default.defaultEdgeOpacity=255.0
nodeAppearanceCalculator.default.defaultEdgeSourceArrowColor=0,0,0
nodeAppearanceCalculator.default.defaultEdgeSourceArrowOpacity=255.0
nodeAppearanceCalculator.default.defaultEdgeSourceArrowShape=NONE
nodeAppearanceCalculator.default.defaultEdgeTargetArrowColor=0,0,0
nodeAppearanceCalculator.default.defaultEdgeTargetArrowOpacity=255.0
nodeAppearanceCalculator.default.defaultEdgeTargetArrowShape=NONE
nodeAppearanceCalculator.default.defaultEdgeToolTip=
nodeAppearanceCalculator.default.defaultNodeBorderColor=102,102,102
nodeAppearanceCalculator.default.defaultNodeBorderOpacity=255.0
nodeAppearanceCalculator.default.defaultNodeFillColor=255,153,153
nodeAppearanceCalculator.default.defaultNodeFont=SansSerif.bold,plain,12
nodeAppearanceCalculator.default.defaultNodeFontSize=12.0
nodeAppearanceCalculator.default.defaultNodeHight=30.0
nodeAppearanceCalculator.default.defaultNodeLabel=
nodeAppearanceCalculator.default.defaultNodeLabelColor=0,0,0
nodeAppearanceCalculator.default.defaultNodeLabelOpacity=255.0
nodeAppearanceCalculator.default.defaultNodeLabelPosition=C,C,c,0,0
nodeAppearanceCalculator.default.defaultNodeLabelWidth=100.0
nodeAppearanceCalculator.default.defaultNodeLineStyle=SOLID
nodeAppearanceCalculator.default.defaultNodeLineWidth=1.5
nodeAppearanceCalculator.default.defaultNodeOpacity=255.0
nodeAppearanceCalculator.default.defaultNodeShape=ellipse
nodeAppearanceCalculator.default.defaultNodeShowNestedNetwork=true
nodeAppearanceCalculator.default.defaultNodeSize=40.0
nodeAppearanceCalculator.default.defaultNodeToolTip=
nodeAppearanceCalculator.default.defaultNodeWidth=70.0
nodeAppearanceCalculator.default.nodeLabelCalculator=NodeLabel
nodeAppearanceCalculator.default.nodeSizeLocked=true
nodeBorderColorCalculator.Nested\ Network\ Style-Node\ Border\ Color-Discrete\ Mapper.mapping.controller=has_nested_network
nodeBorderColorCalculator.Nested\ Network\ Style-Node\ Border\ Color-Discrete\ Mapper.mapping.controllerType=-1
nodeBorderColorCalculator.Nested\ Network\ Style-Node\ Border\ Color-Discrete\ Mapper.mapping.map.yes=0,102,204
nodeBorderColorCalculator.Nested\ Network\ Style-Node\ Border\ Color-Discrete\ Mapper.mapping.type=DiscreteMapping
nodeBorderColorCalculator.Nested\ Network\ Style-Node\ Border\ Color-Discrete\ Mapper.visualPropertyType=NODE_BORDER_COLOR
nodeFillColorCalculator.GOGroups0.mapping.controller=GOGroups0
nodeFillColorCalculator.GOGroups0.mapping.controllerType=4
nodeFillColorCalculator.GOGroups0.mapping.map.[Group0,\ Group11,\ Group13]=120,159,98
nodeFillColorCalculator.GOGroups0.mapping.map.[Group0,\ Group11]=120,159,98
nodeFillColorCalculator.GOGroups0.mapping.map.[Group0,\ Group13,\ Group2,\ Group4]=120,159,98
nodeFillColorCalculator.GOGroups0.mapping.map.[Group0]=120,159,98
nodeFillColorCalculator.GOGroups0.mapping.map.[Group1,\ Group11,\ Group12]=28,248,61
nodeFillColorCalculator.GOGroups0.mapping.map.[Group1,\ Group11,\ Group13,\ Group3,\ Group4]=28,248,61
nodeFillColorCalculator.GOGroups0.mapping.map.[Group1,\ Group12]=28,248,61
nodeFillColorCalculator.GOGroups0.mapping.map.[Group1,\ Group4]=28,248,61
nodeFillColorCalculator.GOGroups0.mapping.map.[Group10,\ Group11,\ Group17,\ Group8]=139,226,201
nodeFillColorCalculator.GOGroups0.mapping.map.[Group10,\ Group11,\ Group5]=139,226,201
nodeFillColorCalculator.GOGroups0.mapping.map.[Group10,\ Group17,\ Group5]=139,226,201
nodeFillColorCalculator.GOGroups0.mapping.map.[Group10,\ Group5]=139,226,201
nodeFillColorCalculator.GOGroups0.mapping.map.[Group10]=139,226,201
nodeFillColorCalculator.GOGroups0.mapping.map.[Group11,\ Group12]=2,6,141
nodeFillColorCalculator.GOGroups0.mapping.map.[Group11,\ Group13,\ Group2]=2,6,141
nodeFillColorCalculator.GOGroups0.mapping.map.[Group11,\ Group14,\ Group16,\ Group5]=2,6,141
nodeFillColorCalculator.GOGroups0.mapping.map.[Group11,\ Group15]=2,6,141
nodeFillColorCalculator.GOGroups0.mapping.map.[Group11,\ Group16,\ Group5]=2,6,141
nodeFillColorCalculator.GOGroups0.mapping.map.[Group11,\ Group17,\ Group8]=2,6,141
nodeFillColorCalculator.GOGroups0.mapping.map.[Group11,\ Group17]=2,6,141
nodeFillColorCalculator.GOGroups0.mapping.map.[Group11,\ Group2,\ Group3]=2,6,141
nodeFillColorCalculator.GOGroups0.mapping.map.[Group11,\ Group2,\ Group4]=2,6,141
nodeFillColorCalculator.GOGroups0.mapping.map.[Group11,\ Group2]=2,6,141
nodeFillColorCalculator.GOGroups0.mapping.map.[Group11,\ Group3]=2,6,141
nodeFillColorCalculator.GOGroups0.mapping.map.[Group11,\ Group5]=2,6,141
nodeFillColorCalculator.GOGroups0.mapping.map.[Group11,\ Group8]=2,6,141
nodeFillColorCalculator.GOGroups0.mapping.map.[Group11]=2,6,141
nodeFillColorCalculator.GOGroups0.mapping.map.[Group12]=200,34,170
nodeFillColorCalculator.GOGroups0.mapping.map.[Group13,\ Group2,\ Group4]=203,54,0
nodeFillColorCalculator.GOGroups0.mapping.map.[Group13]=203,54,0
nodeFillColorCalculator.GOGroups0.mapping.map.[Group14,\ Group16]=206,81,238
nodeFillColorCalculator.GOGroups0.mapping.map.[Group14]=206,81,238
nodeFillColorCalculator.GOGroups0.mapping.map.[Group15]=156,14,45
nodeFillColorCalculator.GOGroups0.mapping.map.[Group16]=69,93,28
nodeFillColorCalculator.GOGroups0.mapping.map.[Group17]=119,116,253
nodeFillColorCalculator.GOGroups0.mapping.map.[Group1]=28,248,61
nodeFillColorCalculator.GOGroups0.mapping.map.[Group2,\ Group3,\ Group4]=77,26,116
nodeFillColorCalculator.GOGroups0.mapping.map.[Group2,\ Group5]=77,26,116
nodeFillColorCalculator.GOGroups0.mapping.map.[Group2]=77,26,116
nodeFillColorCalculator.GOGroups0.mapping.map.[Group3,\ Group4]=152,231,2
nodeFillColorCalculator.GOGroups0.mapping.map.[Group3]=152,231,2
nodeFillColorCalculator.GOGroups0.mapping.map.[Group4]=113,218,185
nodeFillColorCalculator.GOGroups0.mapping.map.[Group5]=97,179,75
nodeFillColorCalculator.GOGroups0.mapping.map.[Group6,\ Group7,\ Group8]=110,238,128
nodeFillColorCalculator.GOGroups0.mapping.map.[Group6,\ Group7]=110,238,128
nodeFillColorCalculator.GOGroups0.mapping.map.[Group6,\ Group9]=110,238,128
nodeFillColorCalculator.GOGroups0.mapping.map.[Group6]=110,238,128
nodeFillColorCalculator.GOGroups0.mapping.map.[Group7,\ Group8]=254,211,26
nodeFillColorCalculator.GOGroups0.mapping.map.[Group7]=254,211,26
nodeFillColorCalculator.GOGroups0.mapping.map.[Group8]=139,172,39
nodeFillColorCalculator.GOGroups0.mapping.map.[Group9]=210,162,88
nodeFillColorCalculator.GOGroups0.mapping.map.[None]=255,255,255
nodeFillColorCalculator.GOGroups0.mapping.type=DiscreteMapping
nodeFillColorCalculator.GOGroups0.visualPropertyType=NODE_FILL_COLOR
nodeFillColorCalculator.Nested\ Network\ Style-Node\ Color-Discrete\ Mapper.mapping.controller=has_nested_network
nodeFillColorCalculator.Nested\ Network\ Style-Node\ Color-Discrete\ Mapper.mapping.controllerType=-1
nodeFillColorCalculator.Nested\ Network\ Style-Node\ Color-Discrete\ Mapper.mapping.map.yes=255,255,255
nodeFillColorCalculator.Nested\ Network\ Style-Node\ Color-Discrete\ Mapper.mapping.type=DiscreteMapping
nodeFillColorCalculator.Nested\ Network\ Style-Node\ Color-Discrete\ Mapper.visualPropertyType=NODE_FILL_COLOR
nodeFontFaceCalculator.OverViewTerm0.mapping.controller=OverViewTerm0
nodeFontFaceCalculator.OverViewTerm0.mapping.controllerType=4
nodeFontFaceCalculator.OverViewTerm0.mapping.map.FALSE=SansSerif,plain,12
nodeFontFaceCalculator.OverViewTerm0.mapping.map.TRUE=SansSerif,bold,14
nodeFontFaceCalculator.OverViewTerm0.mapping.type=DiscreteMapping
nodeFontFaceCalculator.OverViewTerm0.visualPropertyType=NODE_FONT_FACE
nodeFontSizeCalculator.OverViewTerm0.mapping.controller=OverViewTerm0
nodeFontSizeCalculator.OverViewTerm0.mapping.controllerType=4
nodeFontSizeCalculator.OverViewTerm0.mapping.map.FALSE=12
nodeFontSizeCalculator.OverViewTerm0.mapping.map.TRUE=20
nodeFontSizeCalculator.OverViewTerm0.mapping.type=DiscreteMapping
nodeFontSizeCalculator.OverViewTerm0.visualPropertyType=NODE_FONT_SIZE
nodeLabelCalculator.BasicPassThrough.mapping.controller=label
nodeLabelCalculator.BasicPassThrough.mapping.type=PassThroughMapping
nodeLabelCalculator.BasicPassThrough.visualPropertyType=NODE_LABEL
nodeLabelCalculator.GOTerm0.mapping.controller=GOTerm0
nodeLabelCalculator.GOTerm0.mapping.type=PassThroughMapping
nodeLabelCalculator.GOTerm0.visualPropertyType=NODE_LABEL
nodeLabelCalculator.Nested\ Network\ Style-Node\ Label-Passthrough\ Mapper.mapping.controller=ID
nodeLabelCalculator.Nested\ Network\ Style-Node\ Label-Passthrough\ Mapper.mapping.type=PassThroughMapping
nodeLabelCalculator.Nested\ Network\ Style-Node\ Label-Passthrough\ Mapper.visualPropertyType=NODE_LABEL
nodeLabelCalculator.NodeLabel.mapping.controller=ID
nodeLabelCalculator.NodeLabel.mapping.type=PassThroughMapping
nodeLabelCalculator.NodeLabel.visualPropertyType=NODE_LABEL
nodeLabelCalculator.Solid-Node\ Label-Passthrough\ Mapper.mapping.controller=ID
nodeLabelCalculator.Solid-Node\ Label-Passthrough\ Mapper.mapping.type=PassThroughMapping
nodeLabelCalculator.Solid-Node\ Label-Passthrough\ Mapper.visualPropertyType=NODE_LABEL
nodeLabelCalculator.Universe-Node\ Label-Passthrough\ Mapper.mapping.controller=ID
nodeLabelCalculator.Universe-Node\ Label-Passthrough\ Mapper.mapping.type=PassThroughMapping
nodeLabelCalculator.Universe-Node\ Label-Passthrough\ Mapper.visualPropertyType=NODE_LABEL
nodeLabelCalculator.id\ as\ node\ labels.mapping.controller=ID
nodeLabelCalculator.id\ as\ node\ labels.mapping.type=PassThroughMapping
nodeLabelCalculator.id\ as\ node\ labels.visualPropertyType=NODE_LABEL
nodeLabelColor.GOID0.mapping.controller=GOID0
nodeLabelColor.GOID0.mapping.controllerType=4
nodeLabelColor.GOID0.mapping.map.GO\:0006520=203,54,0
nodeLabelColor.GOID0.mapping.map.GO\:0006528=113,218,185
nodeLabelColor.GOID0.mapping.map.GO\:0006820=28,248,61
nodeLabelColor.GOID0.mapping.map.GO\:0009611=156,14,45
nodeLabelColor.GOID0.mapping.map.GO\:0009737=206,81,238
nodeLabelColor.GOID0.mapping.map.GO\:0033993=139,172,39
nodeLabelColor.GOID0.mapping.map.GO\:0034637=152,231,2
nodeLabelColor.GOID0.mapping.map.GO\:0042180=77,26,116
nodeLabelColor.GOID0.mapping.map.GO\:0042430=2,6,141
nodeLabelColor.GOID0.mapping.map.GO\:0042742=119,116,253
nodeLabelColor.GOID0.mapping.map.GO\:0044272=120,159,98
nodeLabelColor.GOID0.mapping.map.GO\:0048518=110,238,128
nodeLabelColor.GOID0.mapping.map.GO\:0048522=210,162,88
nodeLabelColor.GOID0.mapping.map.GO\:0048523=139,226,201
nodeLabelColor.GOID0.mapping.type=DiscreteMapping
nodeLabelColor.GOID0.visualPropertyType=NODE_LABEL_COLOR
nodeLabelColor.Nested\ Network\ Style-Node\ Label\ Color-Discrete\ Mapper.mapping.controller=has_nested_network
nodeLabelColor.Nested\ Network\ Style-Node\ Label\ Color-Discrete\ Mapper.mapping.controllerType=-1
nodeLabelColor.Nested\ Network\ Style-Node\ Label\ Color-Discrete\ Mapper.mapping.map.yes=0,102,204
nodeLabelColor.Nested\ Network\ Style-Node\ Label\ Color-Discrete\ Mapper.mapping.type=DiscreteMapping
nodeLabelColor.Nested\ Network\ Style-Node\ Label\ Color-Discrete\ Mapper.visualPropertyType=NODE_LABEL_COLOR
nodeLabelPositionCalculator.Nested\ Network\ Style-Node\ Label\ Position-Discrete\ Mapper.mapping.controller=has_nested_network
nodeLabelPositionCalculator.Nested\ Network\ Style-Node\ Label\ Position-Discrete\ Mapper.mapping.controllerType=-1
nodeLabelPositionCalculator.Nested\ Network\ Style-Node\ Label\ Position-Discrete\ Mapper.mapping.map.yes=SE,NW,c,0,0
nodeLabelPositionCalculator.Nested\ Network\ Style-Node\ Label\ Position-Discrete\ Mapper.mapping.type=DiscreteMapping
nodeLabelPositionCalculator.Nested\ Network\ Style-Node\ Label\ Position-Discrete\ Mapper.visualPropertyType=NODE_LABEL_POSITION
nodeLabelPositionCalculator.OverViewTerm0.mapping.controller=OverViewTerm0
nodeLabelPositionCalculator.OverViewTerm0.mapping.controllerType=4
nodeLabelPositionCalculator.OverViewTerm0.mapping.map.FALSE=C,C,c,0,0
nodeLabelPositionCalculator.OverViewTerm0.mapping.map.TRUE=S,N,c,0,0
nodeLabelPositionCalculator.OverViewTerm0.mapping.type=DiscreteMapping
nodeLabelPositionCalculator.OverViewTerm0.visualPropertyType=NODE_LABEL_POSITION
nodeLineWidthCalculator.Nested\ Network\ Style-Node\ Line\ Width-Discrete\ Mapper.mapping.controller=has_nested_network
nodeLineWidthCalculator.Nested\ Network\ Style-Node\ Line\ Width-Discrete\ Mapper.mapping.controllerType=-1
nodeLineWidthCalculator.Nested\ Network\ Style-Node\ Line\ Width-Discrete\ Mapper.mapping.map.yes=5.0
nodeLineWidthCalculator.Nested\ Network\ Style-Node\ Line\ Width-Discrete\ Mapper.mapping.type=DiscreteMapping
nodeLineWidthCalculator.Nested\ Network\ Style-Node\ Line\ Width-Discrete\ Mapper.visualPropertyType=NODE_LINE_WIDTH
nodeShapeCalculator.Nested\ Network\ Style-Node\ Shape-Discrete\ Mapper.mapping.controller=has_nested_network
nodeShapeCalculator.Nested\ Network\ Style-Node\ Shape-Discrete\ Mapper.mapping.controllerType=-1
nodeShapeCalculator.Nested\ Network\ Style-Node\ Shape-Discrete\ Mapper.mapping.map.yes=rect
nodeShapeCalculator.Nested\ Network\ Style-Node\ Shape-Discrete\ Mapper.mapping.type=DiscreteMapping
nodeShapeCalculator.Nested\ Network\ Style-Node\ Shape-Discrete\ Mapper.visualPropertyType=NODE_SHAPE
nodeUniformSizeCalculator.Nested\ Network\ Style-Node\ Size-Discrete\ Mapper.mapping.controller=has_nested_network
nodeUniformSizeCalculator.Nested\ Network\ Style-Node\ Size-Discrete\ Mapper.mapping.controllerType=-1
nodeUniformSizeCalculator.Nested\ Network\ Style-Node\ Size-Discrete\ Mapper.mapping.map.yes=60.0
nodeUniformSizeCalculator.Nested\ Network\ Style-Node\ Size-Discrete\ Mapper.mapping.type=DiscreteMapping
nodeUniformSizeCalculator.Nested\ Network\ Style-Node\ Size-Discrete\ Mapper.visualPropertyType=NODE_SIZE
nodeUniformSizeCalculator.Node\ Size-Continuous\ Mapper.mapping.boundaryvalues=2
nodeUniformSizeCalculator.Node\ Size-Continuous\ Mapper.mapping.bv0.domainvalue=0.0
nodeUniformSizeCalculator.Node\ Size-Continuous\ Mapper.mapping.bv0.equal=10.0
nodeUniformSizeCalculator.Node\ Size-Continuous\ Mapper.mapping.bv0.greater=10.0
nodeUniformSizeCalculator.Node\ Size-Continuous\ Mapper.mapping.bv0.lesser=
nodeUniformSizeCalculator.Node\ Size-Continuous\ Mapper.mapping.bv1.domainvalue=0.0
nodeUniformSizeCalculator.Node\ Size-Continuous\ Mapper.mapping.bv1.equal=30.0
nodeUniformSizeCalculator.Node\ Size-Continuous\ Mapper.mapping.bv1.greater=
nodeUniformSizeCalculator.Node\ Size-Continuous\ Mapper.mapping.bv1.lesser=30.0
nodeUniformSizeCalculator.Node\ Size-Continuous\ Mapper.mapping.controller=Degree
nodeUniformSizeCalculator.Node\ Size-Continuous\ Mapper.mapping.interpolator=LinearNumberToNumberInterpolator
nodeUniformSizeCalculator.Node\ Size-Continuous\ Mapper.mapping.type=ContinuousMapping
nodeUniformSizeCalculator.Node\ Size-Continuous\ Mapper.visualPropertyType=NODE_SIZE
nodeUniformSizeCalculator.Term\ PValue\ Corrected\ with\ Bonferroni0.mapping.boundaryvalues=2
nodeUniformSizeCalculator.Term\ PValue\ Corrected\ with\ Bonferroni0.mapping.bv0.domainvalue=0.05
nodeUniformSizeCalculator.Term\ PValue\ Corrected\ with\ Bonferroni0.mapping.bv0.equal=50
nodeUniformSizeCalculator.Term\ PValue\ Corrected\ with\ Bonferroni0.mapping.bv0.greater=50
nodeUniformSizeCalculator.Term\ PValue\ Corrected\ with\ Bonferroni0.mapping.bv0.lesser=50
nodeUniformSizeCalculator.Term\ PValue\ Corrected\ with\ Bonferroni0.mapping.bv1.domainvalue=0.1
nodeUniformSizeCalculator.Term\ PValue\ Corrected\ with\ Bonferroni0.mapping.bv1.equal=30
nodeUniformSizeCalculator.Term\ PValue\ Corrected\ with\ Bonferroni0.mapping.bv1.greater=30
nodeUniformSizeCalculator.Term\ PValue\ Corrected\ with\ Bonferroni0.mapping.bv1.lesser=50
nodeUniformSizeCalculator.Term\ PValue\ Corrected\ with\ Bonferroni0.mapping.controller=Term PValue Corrected with Bonferroni0
nodeUniformSizeCalculator.Term\ PValue\ Corrected\ with\ Bonferroni0.mapping.interpolator=LinearNumberToNumberInterpolator
nodeUniformSizeCalculator.Term\ PValue\ Corrected\ with\ Bonferroni0.mapping.type=ContinuousMapping
nodeUniformSizeCalculator.Term\ PValue\ Corrected\ with\ Bonferroni0.visualPropertyType=NODE_SIZE
